# Supplementary material for: Tryptophan metabolism-related gene expression patterns: unveiling prognostic insights and immune landscapes in uveal melanoma
Source: Aging (Albany NY). 2023 Oct 13;15(20):11201–16. doi: 10.18632/aging.205122 (PMC10637787; doi:10.18632/aging.205122)
Supplement: Supplementary File 1 [file aging-15-205122-s001.xlsx]

## Sheet: TCGA-UVM
Supplementary File 1. The processed data from TCGA UVM and GSE22138.
geneNames	TCGA-WC-A88A	TCGA-V4-A9EU	TCGA-VD-A8KE	TCGA-RZ-AB0B	TCGA-WC-A87U	TCGA-YZ-A983	TCGA-V4-A9EC	TCGA-V3-A9ZX	TCGA-V3-A9ZY	TCGA-V4-A9ET	TCGA-WC-A884	TCGA-VD-AA8S	TCGA-VD-A8KB	TCGA-V4-A9F2	TCGA-WC-AA9E	TCGA-V4-A9E9	TCGA-V4-A9EX	TCGA-V4-A9F1	TCGA-VD-A8KH	TCGA-WC-AA9A	TCGA-WC-A881	TCGA-VD-A8KI	TCGA-VD-A8K8	TCGA-V4-A9F5	TCGA-V4-A9EO	TCGA-V4-A9F4	TCGA-VD-A8KM	TCGA-V4-A9E7	TCGA-VD-A8KO	TCGA-V4-A9ES	TCGA-V4-A9EQ	TCGA-V4-A9EL	TCGA-VD-A8KA	TCGA-WC-A885	TCGA-VD-A8KK	TCGA-V4-A9EA	TCGA-VD-AA8O	TCGA-V4-A9F0	TCGA-V4-A9EH	TCGA-VD-A8KG	TCGA-VD-AA8R	TCGA-WC-A87T	TCGA-VD-AA8Q	TCGA-V4-A9EK	TCGA-WC-A882	TCGA-YZ-A982	TCGA-V4-A9EI	TCGA-V4-A9EJ	TCGA-WC-A87W
TSPAN6	5.72099	7.07304	8.16125	4.92679	11.3201	10.7065	10.5611	7.44662	7.68512	6.29	10.5594	9.42857	9.5414	7.30061	11.1293	7.09038	8.6772	8.85386	10.6893	4.20726	5.74396	7.11825	6.98364	5.00819	7.4102	9.19838	5.21874	6.48637	11.3539	3.47751	3.82465	5.97683	8.08959	8.97469	4.32912	5.98	5.7769	5.46207	12.9795	8.69533	10.1558	10.8279	6.5593	12.1352	6.15737	7.05301	10.4211	14.0941	9.79661
TNMD	0.982006	0.982006	0.982006	0.982006	0.982006	0.982006	0.982006	0.982006	0.982006	0.982006	0.982006	0.982006	0.982006	0.982006	1.10025	0.982006	1.00013	0.982006	0.982006	0.982006	0.982006	0.982006	0.982006	0.982006	0.982006	0.982006	1.00135	0.982006	0.982006	0.982006	0.982006	0.982006	0.982006	0.982006	0.982006	0.982006	0.982006	0.982006	0.982006	0.982006	0.982006	0.982006	0.982006	0.982006	0.982006	1.02224	0.982006	0.982006	0.982006
DPM1	10.5559	16.7779	8.44306	16.9662	11.5302	12.3383	6.23915	15.5552	7.18976	6.0998	8.52213	7.09671	9.42499	8.82879	17.4535	6.6863	14.2936	15.229	13.8975	14.0588	13.9113	8.13709	14.9951	8.87325	13.4604	15.3717	13.5874	11.539	13.8112	14.7231	6.28461	18.8551	9.7658	8.03662	6.79295	3.50833	15.3041	10.4881	29.8386	8.07039	13.4462	14.8073	5.15951	14.2409	5.47442	10.4968	17.0261	11.7235	14.2682
SCYL3	3.17655	4.0319	3.22955	3.98057	3.6737	3.72011	3.00418	3.48564	2.83859	3.03342	3.40025	3.03982	3.2393	3.14351	3.88793	2.7117	3.66024	3.62915	3.578	3.43682	3.34446	3.15381	3.73385	2.88286	3.93406	3.94594	3.92552	3.19493	4.18394	3.56872	2.75895	3.72651	3.72689	3.01838	2.86068	2.57062	3.58097	3.39969	3.50959	3.03648	3.55053	3.99913	2.8397	3.80142	2.62324	3.08336	3.42438	3.45752	3.96599
C1orf112	1.32704	1.48585	1.23576	1.61941	1.30387	1.42389	1.112	1.57996	1.16184	1.1787	1.23634	1.21275	1.30379	1.22413	1.81784	1.14024	1.47472	1.51899	1.43892	1.38643	1.19282	1.20993	1.44432	1.14938	1.43145	1.55462	1.32073	1.35013	1.70131	1.56991	1.16798	1.34938	1.29731	1.17413	1.18393	1.0733	1.46675	1.32912	1.55354	1.26973	1.29714	1.50886	0.985252	1.41799	1.04132	1.22496	1.46019	1.29706	1.41533
FGR	1.5527	1.82408	1.515	1.52601	1.39577	1.54646	1.46289	1.88554	1.54072	1.4249	2.84657	1.56449	1.36587	2.61172	1.6053	1.45139	1.63735	2.45966	1.34434	1.36499	1.93123	1.44643	1.7892	1.30937	1.50575	1.767	7.55574	1.35126	1.33265	1.42207	1.60238	1.93687	1.42256	1.37142	1.47214	1.55133	2.05006	2.20202	1.61845	1.72005	1.40892	1.34658	3.37783	3.75869	1.84687	2.99589	1.59351	1.54179	1.42831
CFH	1.46019	1.44849	2.32851	1.41579	3.18208	1.38222	1.42877	1.62318	1.37981	1.0826	2.76259	1.64249	1.22756	2.76675	1.25577	1.0314	1.38839	1.83897	1.13589	1.04189	1.23509	1.07579	1.19847	1.14462	1.79867	2.62171	4.17685	1.09406	2.9299	1.06738	1.07491	1.78633	1.30329	1.04334	1.55322	1.05343	1.27332	19.907	1.31434	1.19671	1.48302	2.31825	1.58407	1.63359	1.59858	1.12163	1.20865	1.31162	7.06396
FUCA2	9.83024	11.3329	23.6647	20.9101	16.0178	15.6936	13.8151	13.3738	25.2478	6.00026	21.0802	12.6623	6.36408	16.1467	6.65771	5.85749	19.4925	33.5092	18.4401	17.2569	5.74207	10.8592	20.3725	11.5844	25.2837	5.24427	19.858	12.3429	14.0869	11.8221	16.2386	15.814	13.5275	13.2131	15.4392	9.64707	27.7684	12.9847	18.478	14.5898	15.0041	14.5746	13.9305	11.2354	6.56926	13.5873	14.2709	17.3094	13.134
GCLC	3.8692	5.08342	3.75343	4.58199	4.63362	4.42781	2.69487	5.58821	2.86345	3.10963	3.26342	3.47729	3.00918	3.44975	7.20655	2.34387	5.69405	5.0145	3.94938	3.33797	3.28149	3.65173	4.0244	2.74243	4.67274	5.44772	6.05733	3.68146	4.02495	3.5182	2.64442	5.07521	3.50873	2.60139	2.55594	2.11522	3.6795	3.46563	3.44608	2.8234	3.94218	4.0736	2.33855	6.5694	2.46544	3.82414	5.41197	3.19951	5.00418
NFYA	9.83684	12.0246	4.54303	8.77574	6.76805	4.57044	3.73505	15.4294	3.6311	5.52608	6.66418	6.71048	9.49637	6.11527	21.9698	2.61036	16.2852	7.39905	5.43226	5.78614	8.93063	5.91956	5.95017	4.78596	7.46127	15.2833	9.50048	6.29484	8.04178	5.16032	3.38231	9.0013	11.2897	3.65029	2.87628	1.51072	4.28365	4.83218	2.98967	4.51493	5.22041	6.0708	1.87556	18.0545	1.95301	7.62949	18.4652	8.04262	15.7
STPG1	1.44422	1.57984	3.46668	1.32886	2.81796	2.91082	2.3862	1.56068	3.21482	1.7584	2.76383	3.78897	2.60968	2.19342	1.46727	2.05477	1.75069	1.68908	1.62516	1.24428	1.35915	1.64718	2.08665	1.06318	1.85952	1.63319	1.44128	1.42538	2.62717	1.3295	1.28601	1.23124	1.70044	2.16997	1.59845	3.55349	1.50281	1.50162	3.36492	2.45211	2.28524	2.49671	1.83003	2.57994	2.42548	2.38954	1.50686	2.51992	2.31513
NIPAL3	2.148	6.2102	7.10634	3.49137	4.69053	9.47529	4.57772	3.95924	3.94617	1.9533	4.51115	3.90612	4.04344	2.46849	1.96753	3.28515	6.37149	5.69578	8.09203	2.57465	2.29777	3.42008	8.71755	1.89199	5.46374	2.85293	3.37075	2.91224	10.7708	2.27828	2.09898	3.74599	4.30092	3.38242	2.97316	6.4202	2.49277	3.70415	6.95255	4.45301	4.23388	3.32088	1.87815	3.31075	2.58602	2.9594	5.40359	6.29332	4.33022
LAS1L	4.78466	5.0043	4.78491	5.16723	5.08696	4.35006	4.53315	5.34365	4.45939	6.40632	4.46457	4.661	4.91391	4.04134	6.44032	4.60033	5.78566	5.46541	4.65145	5.67559	5.09272	5.58355	5.48962	5.89524	4.25769	4.66669	3.97737	7.30326	4.5581	5.69016	5.39684	5.11536	5.38786	4.6396	5.33666	4.27778	3.81066	5.363	5.31591	4.69937	4.12292	6.21162	3.92443	4.76572	4.26436	3.57306	5.42219	4.03994	6.39183
ENPP4	1.3087	1.93601	1.41447	1.78312	1.31035	1.46394	1.36488	1.57394	1.3449	1.27756	1.56242	1.28238	1.27521	1.29589	1.46418	1.28344	1.5958	1.77055	2.59258	1.66454	1.45619	1.29601	1.49297	1.55243	1.75057	1.34983	2.29984	1.33515	1.43586	1.44373	1.33855	1.94188	1.34278	1.26287	1.39496	1.36699	1.28085	1.61683	1.87032	1.28978	2.85922	1.40377	1.40413	1.50507	1.50002	1.36065	1.63493	1.32151	1.46136
SEMA3F	2.70509	2.54301	1.94565	2.4927	1.78564	1.98185	2.15873	2.99656	2.37841	1.92103	2.93673	2.60944	2.06599	2.19248	1.79362	2.0762	2.75441	2.4107	1.86465	1.67504	1.92731	2.17307	2.0245	2.17476	2.15244	1.96843	4.29347	2.15957	1.67504	1.94112	3.07304	2.89462	1.92164	1.56397	2.12713	2.38094	2.01108	3.22452	2.08394	2.75801	1.62763	1.67113	2.16149	1.74047	2.71069	2.64649	2.7317	2.06369	1.73279
CFTR	1.14477	1.16418	1.14477	1.18318	1.15079	1.14477	1.24127	1.17542	1.14477	1.14477	1.14477	1.14477	1.14772	1.15842	1.14477	1.14477	1.14946	1.14932	1.15735	1.14477	1.14879	1.14477	1.14477	1.14477	1.14745	1.14477	1.14732	1.14477	1.15106	1.14477	1.14477	1.15013	1.14732	1.14477	1.14477	1.14477	1.14477	1.14477	1.14477	1.14477	1.14718	1.18747	1.15749	1.14477	1.14477	1.14477	1.14477	1.14477	1.14477
ANKIB1	4.61249	7.44246	4.12671	6.20859	5.27765	5.51108	3.19322	5.64251	3.10705	2.4988	4.02533	3.10643	3.67313	3.82131	5.167	2.6676	6.77136	6.51878	5.7371	4.4518	4.60863	3.11956	5.09866	3.0777	5.17225	4.56068	6.45916	3.47329	6.89228	5.8137	2.6347	5.75324	4.35227	3.03145	3.20504	2.30436	3.89622	4.12409	4.2186	3.47777	5.69053	8.48714	2.86296	6.46086	2.51949	3.07392	6.17492	5.007	5.92914
KRIT1	2.74767	3.25431	2.31388	2.98338	3.12055	2.6605	2.39684	2.82188	2.2616	2.19693	2.29728	2.22523	2.33252	2.60959	2.75904	2.12522	3.02645	2.92553	2.91996	3.05725	2.83836	2.27751	2.83813	2.38661	2.8212	2.45696	2.83779	2.4373	2.87575	2.88678	2.16511	3.47752	2.45219	2.1567	2.46116	2.02464	2.5722	2.51447	2.57288	2.2083	2.48208	3.72527	2.29524	3.26818	2.17875	2.34945	3.00383	2.41582	3.50354
RAD52	1.88212	2.70691	2.0681	2.84891	2.63279	2.76711	1.44428	2.43221	1.81008	1.4878	1.80601	1.7169	2.30305	1.77126	2.73651	1.45666	3.31066	2.45589	2.84176	3.48987	3.3195	1.65002	2.3328	1.8975	3.42821	2.46196	2.25161	1.92902	4.01159	3.31074	1.75219	2.90926	2.25784	1.57567	2.08578	1.17973	1.55284	2.13229	2.4991	1.56522	2.53339	3.96792	1.63656	2.67193	1.50163	1.98868	2.6557	2.01997	5.26876
MYH16	1.12915	1.1533	1.12798	1.15096	1.15642	1.15096	1.12155	1.13714	1.12954	1.13636	1.12837	1.14999	1.12155	1.12155	1.13324	1.12155	1.13227	1.13733	1.13129	1.14921	1.16752	1.12155	1.13188	1.12155	1.12779	1.13636	1.13305	1.14454	1.15038	1.13266	1.14941	1.13986	1.13889	1.12155	1.14629	1.12155	1.12993	1.15038	1.13791	1.12155	1.1272	1.23783	1.13129	1.17141	1.12155	1.18115	1.13168	1.13266	1.19595
BAD	6.69104	5.69637	4.87113	6.98053	5.49198	3.64654	6.60487	6.70791	7.32775	5.39806	7.24334	8.03354	5.96102	12.3157	4.24278	8.40599	5.27908	8.07824	5.38342	8.06383	6.8942	10.5285	6.13406	13.6786	4.88386	3.57064	8.09311	11.6178	3.94332	6.93936	13.0244	7.52325	6.0268	6.49408	11.3493	6.02903	10.3799	8.80051	8.69832	9.59033	4.31185	4.35111	7.16944	4.56025	11.9505	8.48204	7.20079	5.44843	4.5923
LAP3	9.61442	25.0767	4.87865	14.1547	10.1214	8.812	3.59724	27.3721	3.71698	3.90605	8.9674	9.37973	4.91605	5.19774	16.2642	3.6971	39.2743	24.2923	12.5686	8.81901	4.9277	5.7609	33.6519	8.26987	9.75268	10.537	82.9035	11.112	10.7735	8.98118	5.35017	43.0757	6.25406	4.89266	5.45559	2.25451	6.41852	9.95782	14.2252	6.28315	10.4996	12.6433	1.81696	11.5971	4.11241	5.18022	34.9816	6.89095	12.4352
CD99	9.93975	6.51102	18.0446	9.53459	24.6972	10.8239	19.0775	6.31252	17.4083	21.1609	29.6604	30.9031	20.3303	30.5543	11.2447	23.2518	7.41441	17.9519	5.83817	7.94129	8.06203	25.5086	8.75126	22.3268	20.7434	16.8126	18.3909	5.37015	15.1787	19.1812	16.7744	8.34686	19.1992	30.4853	26.5732	30.5357	30.1711	22.404	11.3443	35.6291	7.28971	18.3878	18.815	23.6286	20.4611	22.7728	5.18369	27.6206	29.1871
HS3ST1	1.1748	1.1582	1.13285	1.12512	1.07033	1.14331	1.13012	1.26848	1.12228	1.0743	1.28099	1.10921	1.07681	1.08749	1.08715	1.06691	1.20754	1.24404	1.58498	1.1216	1.13501	1.12239	1.16343	1.17696	1.10409	1.08874	1.38308	1.17355	1.35522	1.14911	1.10818	1.22971	1.07828	1.06691	1.11591	1.14092	1.09613	1.13535	1.09932	1.11102	1.09761	1.0851	1.10534	1.07931	1.08726	1.10238	1.28508	1.0834	1.15889
AOC1	1.04779	1.05991	1.08062	1.03267	1.05017	1.03743	1.0461	1.02845	1.04441	1.03766	1.05868	1.17699	1.084	1.1206	1.11799	1.03267	1.0428	1.22187	1.05615	1.03988	1.04825	1.02799	1.0283	1.02339	1.03052	1.02784	1.14653	1.05346	1.03229	1.04357	1.04549	1.03812	1.0484	1.03367	1.04518	1.05323	1.4604	1.16939	1.07188	1.09612	1.04403	1.03827	1.07541	1.2089	1.11699	1.06513	1.04472	1.05462	1.03444
WNT16	1.09985	1.10739	1.09985	1.10858	1.09985	1.12606	1.09985	1.09985	1.09985	1.09985	1.10799	1.09985	1.10775	1.09985	1.11373	1.09985	1.13169	1.09985	1.12271	1.09985	1.09985	1.09985	1.09985	1.09985	1.09985	1.10858	1.12714	1.09985	1.09985	1.10643	1.09985	1.12151	1.09985	1.09985	1.09985	1.11253	1.1099	1.09985	1.10631	1.09985	1.09985	1.09985	1.09985	1.09985	1.09985	1.09985	1.09985	1.09985	1.09985
HECW1	1.14948	1.16665	1.14335	1.42812	1.13648	1.13806	1.13648	1.26309	1.13648	1.14289	1.20304	1.14261	1.13648	1.14994	1.13648	1.13648	1.13992	1.1376	1.13751	1.13648	1.13648	1.16387	1.14094	1.13648	1.13788	1.13648	1.1402	1.1415	1.13648	1.1389	1.16637	1.14307	1.13899	1.13648	1.13648	1.14567	1.14372	1.17621	1.14122	1.13751	1.13648	1.13648	1.14066	1.13648	1.16006	1.16479	1.13973	1.13648	1.13778
MAD1L1	7.58534	3.12101	2.91448	2.52209	2.79326	2.41461	2.41326	4.09733	2.46609	2.5974	2.4268	2.42565	2.62987	3.56306	2.41441	2.91333	2.67646	3.49467	2.44928	2.88221	2.67271	3.28853	5.07	4.62689	2.4951	2.45274	5.44337	6.18061	2.40759	2.57905	7.60993	3.12331	2.49789	2.63573	4.91448	2.56513	7.39208	6.72967	4.38166	2.43631	2.45658	2.43459	2.79768	2.61604	2.61815	3.1358	2.9409	2.50336	2.51527
LASP1	16.5962	10.0764	24.4472	11.887	10.5619	12.9371	15.3241	16.0282	19.5541	33.2445	13.792	44.4643	29.9869	18.0126	21.7127	25.709	15.0766	15.5216	8.45681	12.8122	13.2716	21.4458	14.7671	11.6462	25.5677	25.0336	20.4808	17.7066	11.2394	27.1583	23.6362	14.2549	27.2859	23.181	15.3655	42.2822	25.2599	17.5922	17.5272	20.3598	8.70565	11.056	5.86223	18.5651	25.9671	43.0531	11.7504	28.0304	21.7376
SNX11	4.87159	5.91093	7.45357	5.06235	5.12651	6.16949	3.99507	5.33992	7.16384	5.64567	6.9079	9.22754	4.41778	4.23263	5.69342	5.54497	5.38933	5.16108	4.89898	4.25725	4.2608	6.20295	5.91338	4.33862	5.24095	4.25599	6.72732	5.66075	5.1902	3.68876	5.06787	6.14881	4.87688	5.09818	4.45929	5.06077	5.88221	5.2464	11.7996	6.19411	7.72452	5.75893	3.27213	6.36032	5.73391	6.2724	4.58557	5.98331	5.29257
TMEM176A	2.33808	2.24857	3.02883	3.63219	2.04001	1.60963	2.80851	5.81394	1.90998	3.12352	11.7232	6.12228	1.73222	7.66007	1.98358	1.57389	2.02574	6.23781	2.10624	2.88399	2.29231	2.95665	2.14323	2.99976	2.17161	2.06243	8.21076	1.73057	1.36948	1.63706	4.04243	3.78989	1.6971	1.62876	3.8928	2.70121	6.30843	13.8869	8.70533	3.4781	2.38926	1.38171	4.97137	6.29103	14.2098	5.23621	1.74609	1.9795	3.60884
M6PR	14.634	21.43	19.539	13.8223	12.0996	14.4198	4.60688	20.0855	9.01003	16.1302	20.4109	17.5186	16.9856	5.99959	19.9667	14.4222	17.6246	14.6317	17.6089	11.2155	8.51206	9.73673	18.4864	7.44233	20.3994	24.7718	14.7045	14.4814	26.5711	16.6982	16.5147	14.312	16.7548	13.2852	7.12209	6.79477	9.87131	14.2667	20.5981	9.21841	18.888	16.3493	3.46333	18.0706	11.4793	14.0249	14.5091	17.1887	24.7789
KLHL13	1.8466	2.03839	3.31151	2.49798	2.63438	2.08609	2.14539	2.14807	1.86539	1.47595	1.93261	1.67848	1.66591	1.73826	1.62382	1.55891	2.03937	2.02168	9.49945	1.81122	2.03668	1.54793	1.85856	1.86661	1.49706	1.6836	1.58112	2.52653	1.86405	2.59217	1.68336	1.66701	2.60949	1.74253	1.82805	1.60198	1.89467	2.17138	2.20517	1.45619	3.14521	2.28484	1.67726	3.02028	1.68738	1.58392	2.72357	2.28557	3.89701
CYP26B1	2.79751	7.44625	5.55274	3.18098	3.00288	6.65203	1.74662	2.70281	2.33079	6.03255	5.1603	10.3608	1.53205	1.56252	3.6473	1.393	3.95915	3.56336	1.14289	1.48848	2.16322	6.11618	3.6505	3.53101	8.16043	4.13155	4.88681	2.80639	6.04315	1.86353	2.85479	5.12274	2.66002	2.01973	1.82316	2.95113	1.79292	3.52704	0.998772	9.52503	1.1266	4.69226	1.31225	4.96942	1.17133	3.19477	4.74565	2.14973	5.42944
ICA1	1.04482	3.54297	2.88517	3.40082	2.34934	3.84646	1.24234	1.82899	2.74825	1.27415	2.98512	1.66628	1.57825	2.42804	1.18936	1.76485	5.09593	3.7378	4.26862	3.09039	2.47833	2.30498	2.42442	3.09548	2.6486	1.46197	1.77393	2.26686	3.19405	1.38766	1.92164	4.00887	2.0852	1.21963	2.82803	1.49385	3.45341	2.04015	3.10225	2.4158	1.85194	3.98516	1.90246	1.8983	1.82638	2.53247	4.37128	1.86935	1.11528
DBNDD1	9.39594	38.9591	49.0181	34.6106	11.5024	25.2558	12.6041	13.459	17.3481	13.7856	28.217	52.2484	12.8067	5.92519	0.717737	39.656	35.3015	35.0776	37.223	16.9684	2.55974	55.5692	26.5816	30.0751	37.7835	2.74917	16.319	16.5001	6.18256	7.96195	30.5679	14.6923	31.3486	24.1273	37.392	44.7846	8.72281	15.4548	6.7479	35.3543	4.61346	17.8211	1.9432	6.72219	28.4012	7.70549	27.7799	61.0735	4.04386
ALS2	3.41913	6.99914	5.27856	4.70852	4.37357	5.61768	3.21043	4.30545	3.5994	2.88768	4.60535	4.49564	4.07942	2.94557	4.5058	3.04157	4.70915	4.69797	5.28872	4.13132	3.93711	3.20302	4.37893	2.93053	4.95975	4.9021	4.40838	3.61224	6.01477	5.24028	3.25351	4.62992	4.67229	3.31958	3.03559	2.56967	3.56577	3.73069	4.36798	3.5627	5.16326	4.02933	2.63188	8.40107	2.65567	4.87391	4.45713	4.52006	5.4645
CASP10	1.10655	1.25377	1.04988	1.08605	1.06724	1.04766	1.03106	1.16957	1.04391	0.978445	1.16842	1.04904	0.983569	1.06785	1.1236	0.966132	1.15565	1.19297	1.3311	0.985328	1.13684	1.02495	1.12643	1.23244	1.04835	1.08399	3.00945	0.992288	1.0407	0.99986	1.1438	1.42547	1.00407	0.969038	1.03626	0.980434	1.10441	1.16789	1.14349	1.06166	0.997259	1.05202	1.00537	1.16995	1.04934	1.00827	1.15542	1.04552	1.13026
CFLAR	2.78984	5.41632	2.73338	3.86969	3.41913	3.24149	2.44558	3.7304	2.75976	2.26133	3.10685	2.96385	3.07677	2.48416	3.77071	2.28503	3.89386	3.62583	3.5037	3.96875	2.91495	2.83409	3.94961	3.01165	3.78418	3.39512	4.47812	3.12527	3.81583	4.04568	2.64881	4.44237	3.20795	2.36471	2.74527	2.20298	2.86401	3.35228	3.13102	2.73873	3.26031	3.25834	2.34282	5.54861	2.67401	3.21094	3.55236	2.85047	4.453
TFPI	1.411	1.3656	1.28147	1.4596	1.41708	1.22735	2.31303	1.41297	1.24512	1.38838	1.41988	1.67771	1.67861	2.48944	1.48855	1.204	1.36733	1.34965	1.26625	1.22192	1.44085	1.2517	1.28155	1.26995	1.39965	1.80181	1.66801	1.2605	1.25268	1.24594	1.24898	1.66825	1.37498	1.21477	1.28237	1.37761	1.2327	1.30195	1.3494	1.2322	1.7463	4.22335	1.4175	1.44924	1.70098	1.31255	1.34027	1.2512	5.35797
NDUFAF7	4.76825	6.17733	3.06186	4.54841	4.27745	4.45641	3.67886	5.35549	2.80068	2.70868	3.70746	3.52414	3.75455	3.18697	5.07442	3.04391	7.99461	5.73525	4.94535	5.41882	5.63011	3.29296	4.18816	3.31418	3.8091	4.49355	7.13896	3.84826	5.69476	6.12417	3.21114	6.56657	4.06561	3.32428	3.6679	2.50633	3.55018	4.00562	3.68111	3.74942	4.15669	6.27058	2.87956	6.67551	3.40587	3.88859	8.71962	4.92677	5.07986
RBM5	4.73056	9.07106	5.12382	5.6805	7.4897	6.173	3.9237	5.33139	4.16672	4.09029	4.60289	4.54387	5.7913	4.74158	7.47467	3.84034	6.42781	4.89383	4.19345	4.98028	9.24295	3.62745	5.24495	3.61011	5.77867	6.31015	4.90693	4.16079	7.57145	4.76192	3.65318	7.46535	4.90246	3.8344	3.93634	3.39985	4.10207	4.85731	5.60245	4.70514	5.01742	12.8392	3.95306	9.35398	2.85195	5.22568	5.75054	4.88659	12.5162
MTMR7	1.08217	1.13534	1.08544	1.16056	1.15355	1.13953	1.09238	1.13824	1.08552	1.07683	1.123	1.08681	1.09801	1.15195	1.16795	1.08209	1.12955	1.10974	1.12909	1.17236	1.16894	1.07417	1.11256	1.07981	1.10761	1.12399	1.12742	1.09603	1.12795	1.10175	1.07912	1.13267	1.09877	1.08681	1.12407	1.10837	1.10715	1.14806	1.10723	1.08301	1.10426	1.22896	1.09489	1.21906	1.08392	1.13359	1.11744	1.09992	1.16017
SLC7A2	1.45739	1.58131	3.13062	1.79678	4.44819	2.57222	2.11614	1.46053	1.96015	1.85061	2.67006	2.20273	1.971	2.62856	8.42549	1.38651	1.50729	1.74987	2.67312	1.97972	2.65175	1.3851	1.22298	1.1415	2.42095	4.34745	1.75914	1.53299	3.77781	5.12155	1.40372	1.41087	4.72	2.12651	1.67695	2.00612	1.16978	3.78929	1.88566	2.00471	2.89055	2.89456	2.16297	4.68126	1.92361	2.38253	1.58619	1.52112	4.04279
ARF5	38.8466	17.2854	29.1513	28.4758	28.3568	27.6502	27.246	21.083	38.5857	27.4566	34.1382	41.4524	31.4283	39.495	31.5695	35.8912	21.843	25.6713	31.5972	35.6359	27.7261	34.2745	26.5476	43.0219	16.29	19.9913	26.2931	36.9709	19.7398	33.2536	39.5852	22.9083	34.0052	37.7168	34.4272	42.8605	42.9055	26.7332	34.6276	37.2157	16.0457	25.2768	24.5438	22.9503	32.9808	28.111	21.6475	40.625	26.7851
SARM1	1.8149	1.81715	1.47059	1.61875	1.55918	1.3776	1.29243	1.93328	1.58554	1.57322	1.40502	1.59046	1.78276	1.76112	2.00634	1.40406	1.98417	2.33984	1.621	1.69674	1.64799	1.57954	1.74945	1.48816	1.63407	1.55083	1.62882	2.18107	1.67574	1.67949	1.89139	1.64767	1.85154	1.29468	1.51665	1.46052	2.19082	1.9697	2.22607	1.84843	1.90361	1.6886	1.316	1.48076	1.43427	3.06168	1.96135	1.66074	2.1634
POLDIP2	38.8555	28.5277	29.7968	31.9115	28.43	26.6587	36.6056	36.7477	35.8948	51.3205	33.882	71.9954	40.3103	25.7606	39.871	38.533	42.7117	48.1251	27.7529	36.0831	31.7202	49.6525	32.1034	46.5314	44.637	32.4345	29.9571	43.287	23.3871	36.263	47.9342	33.2659	40.8848	41.0754	36.2166	54.6872	52.7964	35.1673	41.99	42.3253	30.1588	26.0753	7.02014	20.0626	56.3159	60.2911	47.3583	35.1696	34.0026
PLXND1	10.2775	6.38304	8.39814	6.29274	9.23038	7.1696	12.7318	7.01345	22.19	25.1025	16.8502	22.4984	21.7517	15.4188	12.2732	7.95396	6.49275	6.96274	2.0129	2.2439	13.1292	9.70684	4.2108	5.98995	15.0661	19.4866	12.4477	4.8795	2.73688	3.52291	11.385	6.54262	21.3766	10.1221	7.23135	12.5753	11.3726	7.77732	15.8261	35.7357	14.6718	11.2653	12.5473	14.6657	13.6569	29.9315	6.61351	13.8843	13.997
AK2	7.96527	10.2402	13.7749	7.66212	9.53211	10.2904	7.07575	12.5085	9.84345	8.29485	11.0012	9.27218	8.1481	6.64218	7.52825	7.84871	12.2706	11.4393	5.42362	5.14737	4.71442	9.07816	12.485	3.76797	6.87092	8.26987	10.1322	4.97779	10.9907	3.92743	5.09082	14.4936	5.04553	12.8809	7.32771	5.40224	6.71981	6.72464	10.7727	15.5092	8.50819	11.1887	5.98141	9.10199	3.68352	6.04348	13.0895	8.69164	4.96086
CD38	1.08353	1.39826	1.02825	1.16706	1.06927	1.14855	1.04198	1.82178	0.987238	1.0263	1.11072	1.0566	1.00363	1.23713	1.1435	0.985732	1.18699	1.20932	0.987415	0.992642	1.07848	1.1171	2.07708	1.02365	1.02214	1.14899	7.43664	0.980063	1.06342	1.01124	1.00495	2.46764	1.05385	0.986972	1.05686	1.01195	1.06944	1.0636	1.2366	1.17007	1.18868	1.02613	1.01178	1.43272	1.03596	1.062	1.29134	1.01372	1.18753
FKBP4	20.0422	11.2409	25.8046	15.5784	11.056	8.52754	2.85909	17.6861	17.6468	27.6488	39.3813	34.6896	17.7254	9.66295	28.318	19.0809	20.9567	27.3104	13.616	14.9158	16.1018	28.8753	17.2703	18.446	28.8843	25.6952	13.7024	33.0582	10.8365	10.5656	30.4655	13.7131	23.9112	27.2	13.8542	13.759	11.0177	9.55997	13.7899	41.6617	13.5602	8.48198	1.13164	13.723	23.4474	22.8809	27.4182	15.5057	17.5344
KDM1A	12.1913	12.1626	10.8857	8.27453	10.6614	14.9733	13.9109	16.1565	7.27228	7.50557	14.7712	9.42742	10.9604	8.14464	7.62974	9.65171	17.8632	12.6189	23.7565	6.30017	4.70976	8.83949	13.0735	3.99804	6.97594	13.4601	12.0505	6.62047	13.6621	10.413	6.19363	13.2484	6.72059	20.2462	9.42033	12.5328	10.7892	6.61634	8.48645	10.005	7.9221	11.9307	4.06718	11.9404	6.79698	6.55285	22.3097	30.67	7.57189
RBM6	3.79428	9.73059	6.13445	5.61176	9.45829	7.39396	4.30514	4.95964	4.40782	3.69691	5.60261	4.03576	6.16858	5.69246	9.34562	3.49531	6.3747	4.35878	5.79729	6.16327	9.51755	3.28012	4.92529	3.21326	5.43853	6.24658	6.24489	3.74348	9.29736	5.19489	2.93227	8.29801	6.96418	4.23535	5.1215	3.58769	3.24254	4.23036	6.18064	4.37016	4.99984	16.3369	3.60729	9.69232	2.96255	5.63174	6.35011	5.37012	23.1934
CAMKK1	2.34406	1.98197	2.66065	2.71142	3.04037	2.07352	1.75803	2.61374	2.42159	2.09713	2.43702	3.75486	1.75732	2.21922	1.9878	1.85351	2.38428	2.66073	1.86839	2.10823	2.50031	2.11689	2.59067	2.10367	3.00345	1.84659	3.17584	1.93585	2.24401	2.35107	2.34682	3.01557	1.9841	1.67711	2.26047	1.41767	2.84437	2.37106	2.23614	3.14498	2.23095	2.93418	1.43412	2.87759	1.65177	3.34822	2.57595	1.58494	3.94338
RECQL	3.38718	6.35813	3.33533	6.37205	4.25022	4.55618	2.43552	5.47198	2.74901	2.52571	3.30966	2.64631	2.53822	2.819	3.16529	2.31434	5.90938	6.43905	2.84732	2.9106	2.87151	2.74918	5.34261	2.68929	5.50503	2.8841	4.7591	3.94766	6.60868	2.92443	2.79937	5.68244	2.58684	2.32271	2.78694	2.36346	3.22294	4.19034	3.55441	2.77469	4.09915	5.25299	2.4375	5.23137	2.51528	3.17788	5.72609	2.54451	5.62256
HSPB6	0.869642	3.27609	1.99107	3.42043	5.32259	0.533501	2.19831	3.81886	4.55426	8.93588	2.5232	0.905157	3.38621	11.6986	6.88116	0.629096	4.751	0.484297	0.551905	0.780587	0.465208	0.781043	1.65471	3.60645	0.779827	1.5966	1.18373	0.485437	0.612441	0.552589	3.00337	1.71745	1.40549	0.538368	2.64609	1.30221	4.46543	1.3413	9.7252	6.86892	4.77116	1.72452	18.5029	1.41865	3.2608	9.80467	8.78431	1.00562	6.66921
ARHGAP33	0.97953	1.62368	1.40308	1.40062	2.26153	1.55316	1.12685	1.27617	1.51142	1.08726	1.27463	1.14189	1.41605	1.48886	1.1514	0.99503	1.34047	1.22238	1.40246	1.48188	1.09923	1.0881	1.5458	1.02695	1.04682	1.26965	1.16031	1.21087	1.68099	1.4551	1.03992	1.44482	1.28522	1.0703	1.25085	1.17734	1.1003	1.04912	1.4495	0.979377	1.07966	2.10723	1.25392	1.95223	1.02465	1.10038	1.38374	1.11879	2.09848
NDUFAB1	24.6929	27.0916	13.6824	29.0048	18.5631	17.8638	16.3438	24.7289	12.6027	14.4981	22.3226	14.4673	15.0061	14.6978	27.4991	21.3732	32.2208	36.5091	23.2151	25.2911	21.1279	19.5006	28.4248	23.0131	26.1249	15.5468	38.3764	28.4151	17.9049	22.7518	18.0862	30.4683	17.1043	21.9199	17.6609	7.3226	29.6974	17.2906	22.6842	22.227	22.2109	20.096	10.6878	19.3214	11.2622	13.1372	33.2845	24.9775	21.2588
PDK4	8.77711	1.44977	8.39598	4.92883	3.2155	3.87302	1.39263	1.58037	1.9879	7.44888	4.78365	2.77319	1.27858	14.9527	27.8714	1.05537	2.11255	1.14073	0.875942	0.773947	4.96522	0.760139	0.77059	0.683623	1.23518	8.9354	1.19085	1.30399	4.45501	0.6541	1.3001	1.18528	1.43154	2.12071	0.668671	1.95914	1.37066	3.137	2.56699	20.3747	26.1844	2.7127	4.80921	2.08684	8.6874	14.4767	1.16751	1.23724	12.8678
SLC22A16	1.11679	1.12509	1.13323	1.12634	1.14388	1.12634	1.11679	1.11679	1.12712	1.11679	1.13464	1.11679	1.11679	1.11679	1.13198	1.11679	1.13761	1.13041	1.23561	1.19554	1.12869	1.1362	1.16344	1.11679	1.12493	1.12634	1.11679	1.11679	1.18207	1.20289	1.12587	1.11679	1.11679	1.13213	1.14888	1.11679	1.12775	1.14669	1.13088	1.11679	1.12415	1.12478	1.12932	1.12759	1.11679	1.11679	1.11679	1.11679	1.12478
ZMYND10	1.0467	1.06606	1.02781	1.12749	1.07876	1.02031	1.06812	1.06223	1.07738	1.09712	1.25991	1.47129	1.15572	1.26282	1.15067	1.12803	1.03653	1.04479	1.03232	1.09918	1.0581	1.03997	1.03913	1.07004	1.12389	1.17201	1.04449	1.12703	1.00746	1.18494	1.08442	1.01603	1.26642	1.09635	1.1294	1.23329	1.42852	1.12359	1.22908	1.06308	1.05313	1.1001	1.09482	1.22304	1.13598	1.23031	1.04724	1.19045	1.17041
ABCB5	17.8069	19.2983	22.3303	12.968	20.9624	17.0544	10.0734	21.2999	17.4521	14.6187	24.2186	10.0546	11.6805	23.0069	15.7176	2.4814	8.66738	18.9723	8.37711	10.3814	12.0954	13.4319	18.8721	5.9812	14.1972	16.4325	8.87176	15.3077	21.6197	10.5277	6.7717	13.6761	13.8283	18.5692	8.9943	8.47904	16.8331	8.74312	21.2596	7.3149	26.5197	25.1909	16.448	16.5471	7.35117	15.5529	16.6768	22.4749	30.2667
ARX	4.31449	1.46611	1.26219	12.8062	1.02884	4.39942	1.05605	1.97348	1.04798	1.04667	1.08917	1.13122	1.02884	1.05382	1.66026	1.04651	3.35954	5.29233	4.78235	21.4131	1.03614	6.66018	1.61123	5.07627	25.4423	1.03475	1.32314	2.38692	18.4541	16.6744	5.13861	1.09701	1.51161	1.02884	6.25727	1.05443	1.04229	3.17961	1.02884	1.33736	1.02884	1.0386	1.02884	1.03545	1.05074	1.03837	1.85042	1.03329	2.41029
SLC25A13	20.2295	12.7895	10.9145	13.8923	7.73955	9.36251	2.90581	13.3776	7.82925	5.83965	12.0589	10.0104	5.66003	10.476	14.9858	3.34288	12.3357	13.2508	6.49269	4.70245	5.11962	9.57056	9.02826	6.35391	16.4832	8.65719	9.60265	13.065	11.1116	6.42547	10.7645	14.0106	8.69835	5.00272	6.81361	2.58909	14.0087	11.9321	11.2222	16.0352	10.0527	11.1042	2.73061	9.4151	4.06641	10.1037	12.2034	6.66127	9.24568
CDC27	5.62696	9.21236	3.94415	8.09797	5.15776	4.92495	3.09343	8.27607	3.28672	3.68219	4.80352	4.00089	3.06545	3.44089	4.06839	2.34661	9.99792	8.86109	4.03752	4.84514	3.61548	4.52067	7.57718	4.01235	8.36001	3.84096	8.16305	5.24248	5.71939	4.0733	3.19616	8.93692	3.2476	2.57404	4.69729	2.09626	7.24726	6.01627	4.93235	4.23455	5.38994	6.37386	2.54715	9.338	3.01121	5.17101	9.33488	3.33255	6.34915
SLC4A1	1.14395	1.14395	1.1521	1.16289	1.14395	1.14395	1.14395	1.15393	1.14395	1.15352	1.15271	1.14395	1.16981	1.15739	1.15148	1.16289	1.14395	1.15067	1.15637	1.14395	1.14395	1.192	1.15047	1.14395	1.1521	1.14395	1.14395	1.14395	1.14395	1.15108	1.16187	1.15169	1.14395	1.15922	1.15454	1.14395	1.14395	1.14395	1.14395	1.15678	1.14395	1.14395	1.14395	1.14395	1.14395	1.15922	1.15047	1.14395	1.14395
CALCR	1.16568	1.16168	1.15078	1.15879	1.15189	1.13999	1.14722	1.16001	1.13999	1.13999	1.15756	1.14611	1.13999	1.14889	1.145	1.13999	1.44638	1.1579	1.14822	1.14944	1.14778	1.13999	1.17502	1.13999	1.15601	1.13999	1.21361	1.14655	1.14611	1.1966	1.13999	1.19715	1.14488	1.13999	1.2313	1.13999	1.19026	1.14978	1.14933	1.13999	1.14956	1.13999	1.13999	1.19671	1.13999	1.13999	1.27823	1.13999	1.20872
HCCS	6.64582	10.2808	11.0738	9.4996	9.91977	10.0153	7.59662	10.3607	9.17589	5.3816	11.4704	6.71149	7.29062	5.09301	7.24227	6.31561	10.5339	11.6236	6.98694	7.69222	6.20554	6.96079	9.34304	7.1609	5.69356	8.60488	9.72732	8.29556	9.2759	7.95491	7.16345	11.477	7.27252	5.99376	6.40217	3.98062	6.90147	8.12608	10.2204	8.90145	11.2799	10.7388	4.828	6.83317	4.79451	3.69381	11.3709	8.49141	6.87633
DVL2	8.17825	5.43237	11.0501	7.28154	8.85065	8.06437	7.68799	10.4999	10.7119	12.8222	11.1981	19.4615	15.414	6.76651	12.998	9.77566	9.7344	7.33008	6.74588	5.50185	7.67157	8.89306	8.25195	4.77393	13.1395	12.0489	5.90937	9.68279	9.12895	7.72963	6.71781	9.33823	11.7264	10.4826	5.93989	12.0616	9.78739	8.21184	11.0323	8.42235	7.23461	9.66975	2.45642	9.54038	9.21576	14.6571	9.69567	10.9382	10.8607
PRSS22	1.08401	1.08401	1.0964	1.11282	1.08401	1.12708	1.08401	1.09928	1.08401	1.08401	1.1108	1.08401	1.09712	1.10432	1.12982	1.08401	1.08401	1.08401	1.24433	1.08401	1.08401	1.08401	1.09409	1.08401	1.08401	1.08401	1.09524	1.09899	1.08401	1.08401	1.11123	1.08401	1.10648	1.08401	1.10014	1.08401	1.08401	1.08401	1.08401	1.08401	1.08401	1.08401	1.08401	1.08401	1.13759	1.10734	1.08401	1.09481	1.08401
UPF1	11.2827	13.1359	14.0042	12.1127	9.15487	10.3855	10.048	14.4437	15.1758	13.7868	13.846	17.8064	13.3917	12.022	11.248	14.0235	14.0845	11.1528	9.48744	8.13622	7.33434	15.8775	14.753	10.3385	12.1027	15.579	11.485	12.5727	11.8516	12.0255	15.396	10.7659	15.249	10.3727	9.62203	13.3924	9.85067	9.65913	12.6623	15.3753	9.85129	9.59383	4.44519	10.5093	15.8792	10.2894	12.6035	13.002	15.5051
SKAP2	1.52706	2.18621	1.47198	1.73698	1.6323	1.52536	1.49176	2.02556	1.60831	1.44112	1.78116	1.36884	1.50776	1.64781	4.20711	1.55533	1.84424	2.00844	2.58149	1.60734	1.35058	1.42715	2.30381	1.42796	1.48167	1.76678	3.914	1.45744	1.4958	1.50299	1.36011	2.41543	1.39904	1.33847	1.42909	1.46963	1.70338	1.53982	2.83922	1.47109	1.56995	2.1854	1.57132	2.1514	1.34582	1.781	2.47576	1.41439	2.14469
SLC25A5	205.316	145.124	106.835	154.418	154.149	188.659	122.613	168.761	98.98	109.573	149.943	137.375	152.585	65.7402	153.759	113.529	177.215	215.713	147.816	96.5881	132.109	174.196	125.027	149.959	55.2256	147.588	116.479	247.083	136.246	137.234	161.117	232.133	80.5263	176.909	84.0213	45.4876	50.0874	153.939	127.969	144.707	201.446	153.071	26.4858	129.145	68.7351	44.5122	167.43	130.492	106.252
HOXA11	1.13949	1.02733	1.41993	1.1216	0.945096	1.10797	0.945096	0.945096	0.945096	1.16492	1.11627	2.82594	0.945096	0.95469	2.88579	0.945096	1.37097	0.988803	0.945096	0.950198	1.29262	1.00022	0.949817	0.945096	0.95667	0.951873	1.46067	1.40676	0.958345	0.955299	0.951492	0.962	0.945096	0.966873	0.945096	1.04378	1.17079	1.12609	0.955147	7.48277	0.945096	0.950731	0.945096	2.04226	0.945096	0.967102	1.24914	0.945096	0.950807
POLR2J	37.1263	15.8325	19.7924	21.0817	24.4789	14.3914	22.2939	16.358	21.885	22.4504	25.6278	16.5297	17.1171	27.1252	18.2965	18.9739	16.5641	23.8078	19.213	32.764	24.9189	24.0302	22.7646	39.1468	13.2384	10.4457	24.3668	28.3289	12.0828	23.628	24.7338	21.1218	15.7721	25.1249	39.4485	21.8185	36.5804	23.6963	23.3988	15.9146	13.0428	14.7826	31.8518	14.4444	27.4723	17.8597	19.1656	17.4076	17.2763
DHX33	5.81376	5.12866	5.9606	7.65797	6.30707	6.38808	3.71131	7.38989	4.10375	4.62853	4.65915	5.26766	5.45078	4.75622	9.00035	4.13918	9.9275	7.30275	6.56888	6.44282	7.69457	4.70009	6.92387	4.55023	7.86931	8.24602	5.38264	6.7782	7.96452	5.41054	5.08036	6.6516	6.66198	4.43867	4.66435	3.55967	5.61498	5.78756	5.88625	4.985	5.89307	6.93643	2.8741	7.45532	4.04708	7.02194	8.73428	4.78777	8.28703
MEOX1	1.22752	1.1189	1.43998	1.12649	1.16929	1.17961	1.19802	1.15932	1.12717	1.23409	1.33145	2.04497	1.20177	1.24781	1.14303	1.13416	1.12445	1.15693	1.12385	1.13033	1.12837	1.14977	1.16128	1.15164	1.13186	3.02782	1.29709	1.14269	1.14857	1.1189	1.13323	1.15036	1.19018	1.17986	1.16145	1.17407	1.15369	1.17841	1.12453	1.14448	1.17125	1.1189	1.34901	1.27322	1.41568	1.1189	1.1189	1.15906	1.79687
THSD7A	1.22514	1.34753	1.16626	1.20753	1.19579	1.14545	1.16644	1.29523	1.17249	1.13389	1.18761	1.1748	1.15079	1.19739	1.21554	1.12606	1.21091	1.24258	1.18957	1.16395	1.24222	1.14581	1.19099	1.14705	1.16573	1.21536	1.44768	1.16662	1.18672	1.14065	1.15168	1.30911	1.15025	1.13851	1.16947	1.14296	1.14385	1.18992	1.23262	1.13656	1.25076	1.16164	1.17213	1.37137	1.17658	1.20149	1.19544	1.17587	1.61294
LIG3	4.58997	4.74227	4.17631	3.69669	3.39326	3.15126	2.23596	4.58879	3.21871	4.27424	2.76267	5.78903	2.15527	3.50522	2.02702	1.75054	4.4864	4.39325	1.75454	2.03501	1.94687	4.71414	4.52056	3.74691	4.95662	2.25077	4.06397	3.48626	4.3851	1.80985	3.77934	4.04031	2.27741	1.78956	3.21237	2.10348	4.66949	3.47435	3.14969	4.99219	3.07793	3.03155	1.89665	3.76171	3.30818	5.08361	4.57273	1.95494	5.02658
RPAP3	2.57422	4.86206	2.08966	4.21116	3.47204	3.37505	1.629	4.52978	1.7999	1.71445	2.32015	1.68234	2.06487	1.88698	3.40871	1.59819	4.73263	4.95174	3.50025	2.78585	2.28942	2.03958	4.35734	1.90893	3.64432	2.97846	3.80205	2.50739	4.63344	3.09594	1.73177	5.8507	2.02682	1.78104	2.02893	1.42144	2.12609	2.57544	2.37942	1.86096	2.57227	4.54385	1.58258	3.04911	1.74478	2.06251	5.77094	2.40617	3.43123
ACSM3	0.989869	1.00992	1.12719	0.991819	1.21785	1.58744	1.1733	1.01975	0.983237	1.03465	1.21411	1.0629	0.976059	0.974108	1.11673	1.00188	1.03738	1.00422	1.06438	1.08404	1.05658	0.994706	1.0327	1.03653	1.07866	1.02904	1.03099	0.977463	1.73849	1.0267	0.976449	1.00399	1.09481	1.01078	1.03083	0.981442	0.984095	1.03497	0.985422	1.08865	0.972782	1.00212	0.97364	0.997827	1.00391	1.03528	1.07101	1.07546	1.12758
CIAPIN1	7.2393	8.62373	13.8075	14.7477	12.4726	11.8506	7.41594	10.1366	12.4554	10.4057	4.94748	12.8922	13.1176	6.85046	8.1463	13.4228	21.4548	21.3837	9.0675	7.95158	5.23743	16.3013	15.5292	11.4434	15.9432	13.2762	7.92419	10.5078	9.48243	14.7362	10.7037	11.6308	10.3684	12.2823	9.75445	8.45357	13.8376	15.9326	13.1593	13.7863	12.2135	14.4845	4.31776	10.6303	12.2724	15.0974	15.2974	10.989	11.3713
SPPL2B	3.6502	6.11329	4.572	4.92831	4.49214	4.55044	4.12709	3.70819	6.16147	4.14028	4.40194	5.05188	4.88627	9.34908	4.08482	6.34212	5.06761	6.11422	5.06868	4.52344	4.81677	7.26583	4.46453	5.65803	4.37639	3.55285	5.53047	6.09442	3.98817	5.18528	6.71998	5.78399	4.4936	4.06825	6.55736	5.3176	3.92688	4.35767	5.96026	5.83431	2.78723	7.32966	4.54446	3.13441	4.38038	4.53203	4.46445	3.71793	5.5251
FAM214B	3.33007	7.27349	4.19547	6.60861	3.6875	3.5586	2.97753	4.68353	3.31725	3.03387	4.52339	4.10001	4.16824	3.46606	4.82305	2.25252	5.51036	6.70745	3.56277	3.59055	4.28644	3.83639	4.91756	4.84611	4.13952	4.13535	6.10529	3.98449	2.67464	6.89569	4.15022	6.66078	4.96879	2.99319	3.55821	3.77532	3.59142	4.84784	3.73566	3.30143	3.01349	4.28534	2.49214	4.72697	3.80444	3.16545	4.76277	4.57611	5.33149
COPZ2	2.48411	3.4141	4.75757	7.48224	7.13154	4.52845	3.64591	4.14333	6.43512	8.19805	9.27461	21.0856	6.46984	8.10913	2.18285	5.52007	3.729	3.37286	3.42491	2.93852	2.85006	4.82265	2.96505	7.00475	2.02432	5.48013	3.7369	4.01554	1.47478	2.99088	4.54777	6.17671	8.20549	4.7194	2.03958	10.3611	3.19716	5.95716	6.5189	11.2009	5.82401	4.38334	3.1944	4.59391	5.92022	8.26727	4.87087	8.23377	8.68298
PRKAR2B	1.58626	2.00858	1.24765	3.2913	1.98738	1.51521	1.25705	2.49528	1.32941	1.24186	1.53576	1.51532	1.35903	2.33811	1.63741	1.16142	2.06279	2.73147	1.33717	1.53095	1.54068	1.45302	2.43233	1.49947	1.64615	1.79753	2.81869	2.0053	1.32799	1.64702	1.40198	1.96125	1.82485	1.47029	1.44482	1.51838	1.54265	1.70156	1.92541	1.53969	1.69348	1.45215	1.37826	4.17835	1.27334	1.64189	2.91564	2.12892	2.7882
MSL3	2.40627	3.55069	2.69699	3.02427	3.64124	3.17917	2.44069	3.16448	2.52716	2.06677	2.94363	2.36036	2.46073	2.49067	4.04214	2.0532	3.24792	3.40657	3.044	2.81213	2.86522	2.24435	3.54247	2.32707	2.34152	3.06867	3.70647	2.39382	3.57505	2.77524	2.17624	4.01691	2.44851	2.4006	2.37242	1.80432	1.9569	2.70441	3.23123	2.44404	2.91928	4.38611	2.4018	3.73825	1.97391	2.10973	3.40218	2.76102	4.03024
CREBBP	6.30883	11.8148	8.84283	9.08545	6.06247	6.44244	4.90631	9.07418	7.20278	7.76658	7.87163	8.19935	9.87878	3.87203	7.31377	4.22268	8.07358	6.24865	5.77162	5.87149	4.03224	8.0991	9.22913	5.19213	12.2743	9.65009	8.89409	7.55236	8.18175	6.45318	9.78576	6.81099	10.4506	5.78617	4.55101	6.54361	5.57538	6.88397	7.80124	5.90371	7.54535	7.41547	2.80523	8.45782	6.72316	9.08195	6.82554	6.98666	11.2939
MPO	1.01499	0.980775	0.965216	1.10923	1.02232	0.995892	0.960088	1.05539	1.07042	1.0446	0.982366	1.02365	1.19896	1.33174	1.08359	1.09791	1.09932	0.972907	1.01879	1.02277	1.1239	1.02674	1.05592	1.03735	1.03629	1.04973	1.04885	1.0599	0.971757	0.973526	1.07272	1.18746	1.33828	1.12302	0.973437	1.15953	1.09685	1.08164	1.22141	1.12072	1.1247	1.00482	1.0073	1.12859	1.29337	1.18269	1.15325	1.23971	1.26676
PON1	1.0516	1.0516	1.06339	1.0516	1.0516	1.0516	1.08318	1.06613	1.05898	1.0516	1.0516	1.0516	1.0516	1.06126	1.0516	1.0516	1.0516	1.06621	1.0516	1.0567	1.0516	1.0516	1.05639	1.0516	1.0516	1.07207	1.06758	1.0516	1.0516	1.0516	1.0516	1.06286	1.06225	1.0516	1.0516	1.09125	1.0516	1.06766	1.0516	1.0516	1.05685	1.09703	1.06058	1.0516	1.22938	1.0516	1.0516	1.05677	1.12055
GCFC2	3.51655	4.90239	2.51368	4.97677	4.47609	3.90167	2.8372	4.22447	2.47968	2.33205	2.52094	2.63203	2.44768	2.7574	4.83081	2.04405	4.63785	5.00733	4.12735	4.35766	4.77199	2.61367	4.23732	2.87542	3.56084	3.15146	3.4895	3.39645	4.99855	3.09911	2.33413	4.3591	3.07014	2.22264	3.48423	2.14563	2.89226	3.62045	3.18442	2.4164	3.80998	5.8016	2.52804	6.31249	2.07182	3.28337	6.7925	2.61862	5.23868
WDR54	2.79497	4.21781	6.57878	4.14938	5.73159	4.61312	4.02536	4.51605	6.68037	3.89601	5.46652	3.28404	4.48861	6.86604	3.50893	8.06118	4.40752	4.63128	4.9534	6.40553	4.82736	3.22667	7.26829	5.17788	3.22861	3.6754	4.49442	3.93498	3.82411	6.35389	6.9498	3.5454	3.90384	3.95015	5.64864	7.95668	9.22024	5.42214	13.0119	3.20601	4.89958	5.02917	7.34221	6.08188	6.0283	11.4526	7.26725	4.51839	3.32366
CROT	1.89721	3.63775	2.45341	2.7404	3.86601	3.51651	2.05152	2.42435	2.42258	2.05384	3.00636	2.43262	2.22631	2.78429	2.41091	2.14649	2.66251	2.68437	3.67824	2.28813	2.6911	1.87627	2.35628	2.05469	2.36571	2.63608	2.42853	1.94326	3.55005	2.41246	1.85123	2.53972	2.60417	2.16696	2.02362	1.90679	2.91565	2.62032	2.99663	2.44723	3.71108	4.28374	2.12292	4.04087	1.98793	2.21472	2.56653	3.11153	3.5526
ABCB4	1.16508	2.02435	1.03706	2.6066	1.98849	1.01386	1.0544	1.31504	1.17573	1.04387	1.26055	1.03557	1.01832	1.24341	1.16711	1.00076	1.92016	1.55577	1.09633	1.30493	1.19382	1.25044	1.51692	3.73693	1.3658	1.08942	1.20531	2.06032	1.03918	1.26395	1.32855	1.58408	1.15646	1.01322	1.23256	1.04514	1.35058	1.63218	1.27981	1.13433	1.69061	1.49159	1.07952	1.06781	1.69337	1.02939	2.262	1.03216	1.71019
KMT2E	5.98448	11.2188	6.27061	8.84998	7.50207	6.97646	4.59767	8.03449	5.18354	4.69338	6.58287	4.3657	5.89573	5.4631	7.95239	3.31315	8.63852	7.20498	6.34136	7.32488	5.98573	4.49155	8.48763	4.72258	6.02839	7.64177	7.13376	5.64208	8.67741	7.84697	4.44654	8.03425	6.40639	3.95866	4.62295	3.62009	5.31839	6.32649	6.47855	3.97556	7.269	9.19058	4.36014	11.2589	3.93447	5.87906	7.00917	5.57313	10.6956
RHBDD2	55.8149	30.4402	44.2712	49.4931	22.7928	21.1639	27.3106	40.9914	51.0574	11.2871	52.0694	36.476	13.2754	28.7803	6.57222	29.6885	35.3476	66.0135	35.204	24.7021	8.27228	73.884	48.7665	37.1291	11.5852	2.40869	46.615	38.1143	10.9225	19.0658	55.3991	47.3463	17.5995	22.2216	43.2569	44.9199	63.3577	44.6149	54.9638	20.5099	27.3718	16.0482	32.0277	8.59298	68.1545	20.8938	35.9548	26.3098	14.6651
SOX8	7.4094	4.55594	2.56115	10.114	6.49825	3.30211	3.53494	8.81107	4.89511	8.9493	4.68845	8.26762	8.96715	3.51678	12.0981	3.36467	8.68208	10.601	25.8497	7.66107	8.12817	16.2001	7.86681	13.0394	39.8689	13.1081	16.4167	9.13437	3.98243	8.81893	6.99945	4.24104	11.325	4.63269	3.9854	8.2162	7.65443	4.14331	0.752115	16.599	1.12721	3.89607	1.84628	3.30738	4.27681	14.1425	7.33167	3.31905	15.6558
IBTK	2.74852	5.25011	3.71649	5.88754	5.51964	4.88809	3.14797	4.09235	2.93606	2.26531	3.70087	2.73815	2.89639	3.34333	3.67357	2.64001	4.82522	6.29828	5.65367	4.68253	3.0769	2.5025	5.50781	2.5503	6.1815	3.90156	6.05304	3.15029	7.18327	4.99026	2.60923	4.36172	3.9888	2.94496	3.13838	2.2404	3.38401	3.28726	3.4878	2.97682	4.60008	7.03176	2.62563	6.5692	2.61318	3.22245	4.68044	4.34169	7.22813
ZNF195	2.04819	3.81001	1.95407	2.92744	3.35794	2.9859	1.92228	2.74985	1.78518	1.66923	1.94426	1.63993	2.09987	2.51338	3.64831	1.70143	3.99244	3.33956	3.37895	3.01105	3.49629	1.72161	3.13779	1.9889	2.63279	2.66914	3.03275	2.10941	3.47141	2.42604	1.6532	3.91546	2.14438	1.73916	2.28092	1.61962	1.95241	2.26005	2.33496	1.86272	2.4458	4.3895	2.03506	3.95084	1.79914	2.44386	3.90855	2.24526	4.76569
MYCBP2	5.26674	9.24455	6.41036	7.32571	6.19888	7.52171	4.3056	6.71905	4.70848	4.15703	7.59485	3.95292	5.81426	4.79915	5.59091	4.0752	6.92299	4.66466	6.45459	5.26477	5.10465	4.32493	6.90006	4.80693	5.83179	5.58092	6.37866	6.08569	7.32137	5.58698	4.69538	6.62085	5.43538	4.81471	4.26489	3.8281	6.43272	6.56729	6.90612	4.24221	9.31785	7.8924	3.59304	5.52334	4.62101	4.93151	5.66815	5.95203	6.11927
FBXL3	2.90736	4.24782	2.60544	3.82914	3.95581	3.31573	2.73981	3.69871	2.54372	2.38427	2.68973	2.46117	2.6512	3.01908	4.3012	2.2117	3.60467	3.0396	3.47864	3.49594	3.49216	2.35078	4.0375	2.55434	3.6395	3.79628	3.7951	2.61236	4.53959	3.25574	2.23285	4.00825	2.85728	2.42249	2.45598	2.12694	2.74146	3.25881	2.95383	2.43805	3.40725	4.69503	2.41014	5.63285	2.20541	2.89832	4.01092	3.30457	5.95049
ITGAL	1.47405	1.76359	1.4292	1.50886	1.38917	1.46031	1.37446	2.98305	1.44544	1.35638	2.32014	1.53402	1.33419	2.07619	1.61633	1.32085	1.54535	1.60451	1.34191	1.31249	1.5042	1.72886	3.62803	1.32712	1.3448	1.56183	8.81912	1.34633	1.32205	1.3243	1.52429	2.95676	1.33917	1.30919	1.61319	1.35847	2.06043	1.79075	2.09138	1.85908	1.30847	1.32752	1.75121	2.42657	1.78119	1.73087	1.57951	1.44021	1.39166
PDK2	3.07581	4.05382	5.02276	2.95805	3.77485	3.34442	4.33471	3.25859	5.36292	6.03078	4.47611	8.32034	5.15258	6.60423	2.59932	5.38372	3.0828	3.89936	4.39282	2.81565	2.85143	3.83096	3.27188	2.91568	3.3666	5.19956	3.96201	3.14291	2.63886	3.34872	5.86151	2.38169	6.0291	4.37225	3.25952	8.82078	4.85679	4.02756	6.75753	4.82248	6.87736	5.20409	2.26309	4.81404	9.89567	5.77047	3.18421	5.80363	6.86477
ITGA3	5.92261	13.9347	10.8719	14.1826	8.4599	11.8715	13.1441	3.16135	24.8032	11.3482	15.647	6.62388	5.97722	21.8019	-0.242996	13.7511	14.7651	12.8862	83.0114	9.65405	3.00012	6.23701	19.6585	15.985	11.0268	5.54243	2.12356	1.01656	8.22802	15.2698	21.199	5.74579	15.739	3.90627	13.0239	47.9463	28.4145	14.4652	25.7233	6.95675	26.7142	9.87536	5.53559	2.44814	26.7862	10.183	8.45115	9.41267	15.9335
ZFX	2.85233	5.13497	2.68532	4.1351	3.79056	3.74783	2.75019	3.76897	2.27546	2.17609	3.01741	2.27108	3.3123	2.91035	4.14471	1.93238	4.36728	4.36728	3.21715	3.65515	3.35173	2.31581	3.56138	2.74535	3.00312	3.66414	3.49906	2.71929	5.28	4.2407	2.1654	4.18098	2.86985	2.3135	2.32434	1.93499	2.1123	2.84334	2.87754	2.56366	4.14394	4.38334	2.39612	5.30767	2.23934	2.69439	3.8665	2.65358	7.171
LAMP2	14.7207	31.8891	16.5773	20.0586	18.977	22.4082	8.01865	24.1704	10.0647	5.69247	18.9306	11.1891	8.90064	9.15531	13.7223	5.86542	19.349	23.6755	22.4245	17.2203	8.68176	13.9196	27.6994	11.7889	14.0757	14.8009	29.5731	14.6316	24.3473	13.7229	9.62955	24.4984	15.9319	10.999	9.54334	4.05689	22.3335	15.0939	17.0689	10.9595	22.75	21.5245	5.78363	23.1551	5.66223	6.45954	21.2017	22.4377	18.6482
ITGA2B	1.07875	1.23654	1.04698	1.11183	1.05222	1.05705	1.12927	1.0627	1.04485	1.03322	1.055	1.1124	1.11347	1.04567	1.10528	1.06409	1.11363	1.07032	1.08686	1.17521	1.06901	1.13746	1.09316	1.12976	1.09324	1.06401	1.07981	1.22672	1.03633	1.11126	1.16841	1.17087	1.09586	1.04272	1.06843	1.11085	1.06155	1.10405	1.24989	1.03085	1.08137	1.0776	1.04428	1.11519	1.0645	1.15949	1.22901	1.03404	1.11855
ASB4	1.17044	1.14885	1.15613	1.16578	1.16087	1.14885	1.17331	1.14885	1.14885	1.15744	1.1567	1.14885	1.15654	1.22663	1.23636	1.1531	1.17044	1.15188	1.14885	1.15523	1.18582	1.14885	1.14885	1.14885	1.14885	1.1531	1.15212	1.16652	1.15711	1.14885	1.15687	1.14885	1.15548	1.14885	1.14885	1.15499	1.14885	1.17208	1.15826	1.15171	1.16177	1.16292	1.15997	1.14885	1.14885	1.16259	1.15466	1.15204	1.1702
GDE1	7.30674	12.1302	8.36701	10.3762	8.72241	9.37918	4.78652	9.48698	5.95413	2.67525	9.97396	5.66204	5.34731	5.22224	7.26139	4.51322	12.7326	13.2105	11.9153	6.23457	4.0577	6.23234	9.29356	5.5237	12.5276	7.46456	17.0012	6.54055	8.72417	7.75996	4.86401	10.2208	8.23489	5.25102	5.33365	2.14169	7.93397	7.83699	9.16987	6.86295	13.246	7.71638	3.131	6.91083	3.81823	6.51408	11.5796	8.75118	7.95829
CRLF1	1.28972	1.16563	1.99237	1.20964	1.12896	1.11748	1.42758	1.17742	1.11442	1.46057	1.4595	2.55914	1.39757	1.88772	1.39199	1.49426	1.13975	1.30418	1.05325	1.32814	1.92072	1.14427	1.24095	5.45035	1.27272	2.084	1.20758	1.55971	1.09696	2.71163	1.56323	1.10263	1.39979	1.12911	1.66167	1.42039	1.4161	1.38601	1.09666	1.27793	1.02914	1.07247	2.12602	1.66006	2.682	1.14037	1.14052	1.06588	4.32874
OSBPL7	1.76597	2.02892	2.58663	1.78275	3.01813	2.15589	2.16798	1.6614	2.43848	5.04845	2.06049	3.82362	3.51632	2.33561	1.80177	2.6279	2.39521	2.16282	2.19254	1.4984	1.90449	2.42077	2.32776	1.39283	2.54482	2.52318	1.79738	2.75757	2.12301	1.68381	1.89764	2.29511	2.27524	2.60033	2.24999	3.67786	2.887	2.31728	3.75409	1.5784	2.00798	3.50939	1.33239	4.23226	2.03616	3.42492	1.75596	2.5248	2.50947
TMEM98	20.1237	17.9795	24.3709	28.7714	20.2958	23.6368	13.4981	26.3635	24.5746	15.5593	13.4726	43.6753	17.2627	23.1512	14.2949	17.1689	26.9164	29.3211	18.8111	15.958	13.9708	42.2297	23.7438	27.6241	38.3265	16.693	20.0612	37.7557	18.7394	9.19367	32.2641	22.7216	25.3477	19.0173	16.4225	31.4431	26.1993	35.6783	24.5528	18.2111	22.663	16.6566	4.89559	18.1081	19.4867	34.0756	30.269	29.3568	33.8441
YBX2	1.42978	1.43503	1.15548	1.27442	1.33972	1.12192	1.29885	1.18379	1.16153	2.04276	1.22009	1.76116	1.28481	1.31631	1.38891	1.35204	1.25639	1.08847	1.40341	1.13516	1.37076	1.42704	1.1936	1.85111	1.38846	1.175	1.1992	1.68445	1.16586	1.13105	1.50466	1.82622	1.42419	1.13756	1.21141	1.15331	1.14817	1.35124	1.62189	1.20776	1.41152	1.42967	1.30456	1.18641	1.35079	2.64217	1.24406	1.15365	1.33549
KRT33A	0.991969	0.991969	0.991969	0.991969	0.991969	0.991969	0.991969	0.991969	0.991969	0.991969	1.0223	0.991969	0.991969	1.0379	0.991969	0.991969	0.991969	0.991969	1.01325	0.991969	0.991969	0.991969	1.01467	0.991969	0.991969	0.991969	0.991969	0.991969	0.991969	0.991969	0.991969	0.991969	0.991969	0.991969	0.991969	0.991969	1.02904	0.991969	0.991969	0.991969	0.991969	0.991969	0.991969	0.991969	0.991969	0.991969	0.991969	0.991969	0.991969
MAP3K14	1.25343	4.47012	2.75553	4.85745	2.67494	2.44253	1.47383	2.44415	3.30777	1.84891	1.62007	2.36379	1.9085	1.64657	2.00057	1.50343	3.14208	2.08651	2.59984	3.079	1.64634	1.67199	3.693	1.52467	2.62557	2.38216	3.3273	2.84419	2.57171	2.41796	2.41176	3.11651	2.58837	1.83767	2.15386	2.57272	1.70353	2.00491	4.2894	1.54358	2.51716	2.59318	1.33093	2.86488	2.13572	1.80753	2.51119	1.92563	2.8827
ABCC8	1.00647	1.06737	1.00176	1.04424	1.00053	1.00924	1.01402	1.03468	1.00215	1.00492	1.06313	1.00477	1.00184	1.00469	1.01911	1.00199	1.00585	1.00161	1.00438	1.01695	1.02057	1.00199	1.00053	1.02096	1.00053	1.00199	1.00169	1.11185	1.00338	1.00269	1.00053	1.00176	1.00053	1.00053	1.00215	1.00261	1.00223	1.00169	1.00053	1.00053	1.00608	1.00778	1.00824	1.00053	1.00593	1.02181	1.00153	1.00161	1.0067
CACNG3	1.00591	1.14502	1.00591	1.02479	1.00591	1.00591	1.00591	1.60992	1.01619	1.00591	1.12065	1.00591	1.00591	1.01931	1.00591	1.00591	1.02662	1.00591	1.02449	1.00591	1.00591	1.00591	1.00591	1.00591	1.00591	1.00591	1.02814	1.00591	1.00591	1.00591	1.00591	1.00591	1.00591	1.00591	1.00591	1.0334	1.00591	1.00591	1.04802	1.00591	1.00591	1.01375	1.11806	1.00591	1.00591	1.80331	1.01246	1.02023	1.04573
TMEM132A	1.22	2.00872	1.60793	2.45966	1.19093	1.02082	1.11554	3.20753	1.42351	1.12839	3.14187	1.83663	1.48453	4.45244	3.06602	2.33252	3.67193	2.06761	3.82158	3.8177	5.48889	1.82537	1.97221	1.59013	1.29364	1.75773	2.5969	2.1001	0.789075	2.68813	2.77052	1.57788	2.11935	1.18789	2.63282	3.25797	1.66994	3.28292	2.37155	1.3221	0.787857	0.89437	1.79212	1.33511	3.0244	6.14379	7.44119	1.34127	3.32675
AP2B1	18.8491	23.9676	26.6963	31.3209	16.7362	17.9062	8.40517	25.3764	19.1023	12.5121	23.942	38.545	18.5968	14.5562	19.5085	19.1675	31.8066	35.9705	30.8574	14.4429	6.68386	24.0342	30.6132	14.8806	33.8008	25.2087	18.7247	22.5552	22.0654	21.924	22.3953	21.4437	25.1944	16.9087	14.2585	13.3863	38.814	29.0642	27.2962	25.9497	26.1381	17.95	2.12716	28.0971	14.7652	32.8358	24.2381	25.5588	21.8791
TAC1	1.12447	1.13904	1.13904	1.14134	1.15652	1.12447	1.12447	1.1604	1.12447	1.12447	1.12447	1.12447	1.12447	1.29174	1.12447	1.12447	1.14911	1.20908	1.12447	1.12447	1.12447	1.5015	1.12447	1.19743	1.12447	1.31056	1.12447	1.1774	1.12447	1.39128	1.12447	1.13843	1.12447	1.12447	1.14341	1.12447	1.12447	1.19063	1.13697	1.12447	1.12447	1.12447	1.14669	1.2007	1.25023	1.12447	1.13612	1.12447	1.13867
CX3CL1	1.79509	1.94825	2.85797	1.85249	1.94104	3.10481	1.46415	2.7985	1.65122	2.17959	2.01593	3.79432	1.62452	2.47792	1.16866	1.89469	5.11639	1.53091	4.22539	1.30463	1.66511	12.6929	3.64224	2.91475	4.26921	1.52669	2.37119	4.03311	3.02486	5.05593	2.07478	1.25314	4.16969	2.94514	3.93842	4.83356	1.7822	2.65011	4.70335	3.19735	1.07651	1.30739	1.89553	1.66596	3.36209	4.47377	3.56896	2.73612	4.657
SPATA20	41.9945	32.8595	22.4648	10.7715	12.9037	21.021	31.487	28.7828	24.4439	33.8071	25.8461	60.9543	14.8924	29.2684	6.25225	47.4286	36.5038	32.1787	35.3457	36.0582	14.8453	74.2377	29.7538	68.0175	32.8033	6.71313	9.7718	30.1233	15.579	37.1303	78.8183	20.7929	25.5083	16.666	31.9271	45.7215	58.7625	40.8085	14.2983	19.8877	32.0022	18.2256	10.3714	25.3327	47.9411	39.6031	34.5583	21.1244	1.25402
CACNA1G	1.1997	1.25835	1.20039	1.20682	1.201	1.20314	1.19411	1.38508	1.19411	1.19411	1.22451	1.21693	1.1974	1.19663	1.19556	1.19594	1.20598	1.20192	1.20835	1.2023	1.19411	1.19411	1.19541	1.19801	1.19564	1.19411	1.19839	1.19977	1.19763	1.20368	1.19755	1.19564	1.19556	1.19702	1.19617	1.20467	1.19617	1.19556	1.19679	1.19656	1.19411	1.19862	1.21562	1.19411	1.20085	1.34396	1.19533	1.20506	1.2216
TNFRSF12A	1.52065	13.4976	3.09633	10.0124	2.34424	4.39471	3.54861	5.05333	6.82306	2.0577	11.4717	1.18894	1.00252	3.04444	0.697438	1.63946	8.02751	13.1079	4.23401	5.53002	1.75491	3.099	10.9052	3.35715	2.23192	1.61642	9.87775	2.78461	2.54936	12.5021	5.66799	10.5836	1.1079	4.47575	6.16613	7.04748	17.9598	9.52078	2.38064	0.768176	2.24092	1.30691	2.8771	1.1092	8.21347	1.04968	14.4879	2.97599	2.13562
DLX6	1.09995	1.112	1.25293	1.10498	1.0892	1.11024	1.0892	1.10041	1.09492	1.09987	1.10392	1.10963	1.0892	1.09667	3.39611	1.0892	1.18139	1.1194	1.11337	1.09713	1.10231	1.12664	1.10025	1.10056	1.0937	1.0892	1.14281	1.17735	1.0892	1.09316	1.09415	1.09789	1.09332	1.0892	1.10102	1.09682	1.0892	1.09332	1.09705	1.0892	1.0892	1.0892	1.09614	1.11894	1.11863	1.09774	1.65542	1.09713	1.1425
MAP3K9	1.26055	1.6535	2.09321	1.35995	1.61342	1.89385	1.47646	1.50007	1.74601	1.23601	1.92417	1.54908	1.2877	1.37976	1.12387	1.50696	1.52053	1.8137	1.6852	1.32006	1.26892	1.44373	1.45795	1.13875	1.52704	1.1871	1.6097	1.52843	2.07703	1.2162	1.1791	1.35874	1.55373	1.501	1.30862	1.51477	1.54917	1.37678	1.71979	1.72518	2.07312	1.84588	1.33875	1.49487	1.55252	1.59008	1.54406	1.5925	1.62263
RALA	9.38383	9.06397	8.76675	9.25707	12.4661	8.44097	5.56916	9.5583	6.10381	4.70835	7.84599	5.27371	6.26897	10.6939	12.2398	7.97697	10.6963	10.3528	9.8526	9.63926	8.31899	5.27309	9.83644	5.64289	10.789	9.79911	10.2299	7.14425	11.0603	8.75713	4.9123	10.5686	8.11781	5.30088	7.18089	3.08616	9.63395	7.88062	9.42939	5.51421	9.33957	11.301	5.16812	12.7584	4.47408	8.04047	11.1596	6.69418	13.4108
BAIAP2L1	9.06277	12.3581	8.39908	8.9274	7.55545	9.32304	6.20618	13.0712	5.052	8.19215	8.49233	8.48033	11.0483	10.9374	6.85841	6.23016	7.65177	6.66201	10.2545	3.44575	7.89014	11.6808	7.30179	4.81755	6.51311	7.99529	11.0771	8.85445	8.36872	2.73103	4.31521	8.35612	8.80964	12.8758	8.17025	6.38974	10.9126	8.52215	5.45517	8.92548	7.05873	8.80364	4.13103	16.4233	5.85489	3.48334	11.2143	13.6906	6.18558
KDM7A	3.18568	4.20619	2.04269	3.85981	2.51957	2.51891	1.94158	3.41505	1.87798	1.90225	2.12773	1.90158	2.27049	2.21542	3.87571	1.75054	3.33763	3.20091	2.45498	2.99737	2.50757	2.25318	3.53405	2.50724	2.87076	2.95506	3.45662	2.9332	3.11661	2.70887	2.07763	3.43012	2.54193	1.96104	2.28316	1.77539	2.34319	2.71964	2.07622	2.04194	1.93537	2.82166	1.92692	3.62281	1.9015	2.32895	2.8821	2.25393	3.73013
ETV1	1.36498	3.29363	2.39508	4.17182	3.34445	5.29269	2.88777	1.50941	1.63095	1.12623	1.76328	1.23288	1.51813	3.10878	4.05306	1.94056	2.94214	2.95779	11.8236	1.33621	1.26133	1.2311	2.45168	2.04536	1.24383	2.44575	1.17288	1.55553	6.08628	1.57997	1.30799	1.50324	2.19181	1.94527	1.27375	2.40009	1.22362	1.94072	2.44027	1.09785	4.71926	4.51691	1.25455	1.67012	1.63357	1.29434	2.38213	2.19813	5.32369
AGK	4.09121	3.89981	3.14045	4.07811	4.18997	3.89719	3.29846	3.75956	3.20027	2.98621	3.45598	3.09659	3.33586	3.52799	4.05741	2.94873	4.40321	4.29839	3.75244	3.89007	4.05201	3.0682	3.46163	3.47382	3.97149	3.8643	3.53298	3.46866	3.74074	3.73067	3.01526	4.3659	3.36032	3.13955	3.24167	2.43207	3.95725	3.42701	3.88296	3.05977	4.10577	4.77054	2.73303	3.37628	2.72125	3.26156	4.32466	3.20272	4.12705
ALDH3B1	3.11958	3.91589	9.93881	6.1744	8.19199	5.10595	6.62076	4.97711	8.89716	9.61474	5.83518	10.9637	10.6549	6.21126	15.7555	5.93759	1.85277	7.53525	5.93858	8.86061	6.52969	11.5537	5.16291	6.65929	9.32707	7.5606	8.94483	5.39659	2.98755	21.4738	12.41	3.90036	12.8931	10.8208	8.18856	12.0014	4.61139	6.75721	7.05691	27.5079	4.60051	3.80808	4.17044	3.55254	10.4951	23.609	2.75782	7.35875	7.76992
TTC22	0.961068	0.983044	0.964767	0.973797	0.977169	0.982282	0.975755	1.0333	0.961068	0.965311	1.0283	0.961068	0.988048	0.997078	0.981303	0.961068	0.97347	0.973253	0.983261	0.961068	0.976951	0.982609	1.02612	0.961068	0.979127	0.969554	1.30604	0.961068	0.969336	0.964223	0.969119	1.00317	1.00752	0.961068	0.980106	1.09042	0.985328	1.00752	1.00513	1.08661	1.12012	0.978692	1.00012	0.980215	0.992617	0.961068	0.981521	0.980324	0.97891
PHTF2	2.18442	3.29623	1.75851	2.64142	2.37578	2.34446	1.62514	2.53636	1.62925	1.5221	1.90908	1.64197	1.64437	1.80875	2.09959	1.5	2.79324	3.05958	2.24405	2.19869	1.94979	1.59614	2.17008	1.71764	2.09719	1.84209	2.49426	1.87148	2.99678	2.36997	1.55993	2.97406	1.77409	1.58948	1.74796	1.45906	2.51589	2.0357	1.91467	1.67934	2.04648	2.83473	1.69221	2.60669	1.50046	1.60847	2.82046	1.81542	2.58164
CCL26	1.18442	1.24591	1.20041	1.64864	1.09688	1.05023	1.05845	1.46926	1.11141	1.18242	1.28972	1.14937	0.998194	1.62451	1.03962	1.31177	1.16897	1.2589	1.10065	1.03724	1.22554	1.10387	1.12539	1.02632	1.08681	1.15468	1.71105	1.05261	1.02363	0.998194	1.21931	1.38625	1.01856	1.04	1.55234	0.998194	1.17712	1.16136	1.15275	1.06829	0.998194	1.01987	1.27258	1.23338	1.91895	1.08258	1.21332	1.05722	1.26135
FARP2	4.72968	6.37353	4.92519	6.35849	4.49568	4.3574	2.46883	5.05793	4.01265	3.2916	4.21664	9.95724	4.7296	3.76592	5.09456	4.16489	5.67115	6.91727	5.35841	3.00562	3.10079	3.63211	5.52099	3.15216	9.57493	5.16351	5.89852	4.24657	6.67309	3.85708	4.74511	4.38154	5.71195	4.03308	3.36001	4.14854	5.08947	4.40776	3.53339	6.727	6.95945	4.30426	2.01016	7.43671	3.11707	6.00541	3.81883	4.70986	6.42104
USH1C	0.991539	1.04148	0.974025	1.11705	0.961176	0.961176	0.995593	1.51062	0.977314	0.964924	1.62297	0.975554	0.974713	0.961176	0.961176	0.964924	0.98825	0.977084	1.04882	0.966759	0.961176	0.972495	0.961176	0.961176	0.995899	0.961176	0.961176	0.972801	0.964771	0.966759	0.975172	1.37326	0.978614	0.961176	0.969512	0.97196	0.969665	0.972801	1.41043	0.968671	0.975402	0.961176	1.16668	0.961176	0.968059	1.12378	1.02764	0.972419	0.976855
GGCT	18.3003	9.10189	10.1003	12.1726	19.8997	16.8486	12.44	12.7189	9.70194	9.67993	12.1027	7.6841	9.80851	10.7742	12.7	14.082	11.5644	14.743	20.1669	18.935	16.1838	9.68657	11.6178	12.3238	10.0922	9.35357	10.695	14.9037	12.3077	16.298	9.75831	13.0638	11.6506	12.3045	14.7112	5.59737	11.1665	12.1276	10.1641	8.46045	14.1054	16.6962	9.71993	10.5672	8.06135	7.05787	13.197	13.6263	9.5349
DBF4	2.73858	3.50458	1.96778	2.96675	3.23756	2.2939	2.09473	3.17823	1.82615	1.67558	2.13974	1.79794	2.01838	2.02622	4.46716	1.65106	4.33371	3.54667	2.60133	3.91097	3.1386	1.88224	3.15684	2.24352	2.62775	2.66201	3.3147	2.33611	3.23555	2.90562	1.77443	4.36136	2.44302	1.7966	2.23871	1.60986	2.01558	2.33084	1.96498	1.76704	2.13481	3.27048	1.70827	2.76209	1.76559	1.89344	4.66532	2.03439	3.30597
TBXA2R	1.83988	2.18232	1.08564	3.41343	1.74945	1.37327	2.5716	3.18525	1.62633	1.76027	1.43572	1.78857	1.73278	2.1367	1.37375	2.17321	2.06026	1.75872	1.51362	1.53493	1.52493	1.5899	1.39742	3.30666	1.44385	1.2717	1.82614	3.60982	0.994069	1.34114	2.1467	2.37001	2.1154	1.33976	1.40409	4.77766	4.38976	1.48947	2.51387	1.63674	1.07149	1.35163	1.4445	1.40067	1.96341	1.3	3.14507	1.26535	1.43816
IFRD1	3.06411	4.89135	2.91727	3.76139	4.40138	3.75092	2.97169	3.22119	2.75281	2.61336	2.70699	2.64354	3.11434	3.27627	3.57765	2.63473	4.11267	3.87077	4.72469	3.84555	4.13889	2.60433	3.65487	2.69983	3.5446	3.52852	3.3829	2.85867	4.36294	3.4307	2.55762	4.62026	3.18286	2.73585	3.23408	2.54407	2.80161	2.94228	3.09286	2.66766	2.90339	5.42549	2.81384	3.43621	2.60719	2.55674	4.369	3.45251	3.71171
LGALS14	0.911569	0.911569	0.911569	0.911569	0.911569	0.911569	0.911569	0.911569	0.911569	0.911569	0.911569	0.911569	0.911569	0.911569	0.911569	0.911569	0.911569	0.911569	0.911569	0.911569	0.911569	0.911569	0.926593	0.911569	0.911569	0.911569	0.911569	0.911569	0.911569	0.911569	0.911569	0.911569	0.911569	0.911569	0.911569	0.911569	0.911569	0.911569	0.911569	0.911569	0.911569	0.911569	0.911569	0.93582	0.911569	0.911569	0.911569	0.911569	0.911569
COX10	4.46569	3.08047	3.79117	4.7108	3.61237	3.56973	3.13544	4.4161	3.44394	3.43211	3.80184	4.5456	3.5976	3.35708	4.65534	2.58897	4.77233	4.62355	3.51877	4.08666	3.54987	3.51583	4.15914	3.37557	3.88165	4.00988	3.6829	3.88116	3.88948	4.14623	3.41274	4.81634	3.91725	3.39464	3.25086	2.86577	4.684	4.28561	4.19885	3.58127	3.9733	4.02944	2.52823	3.5711	3.45001	3.85876	4.81478	3.39015	3.96156
GTF2IRD1	6.42685	5.03178	5.59369	4.98097	6.20311	6.62695	7.71072	4.97783	5.95769	7.58616	5.22395	7.1803	9.23388	8.14713	10.8342	6.56051	5.21531	4.89411	4.99228	5.22254	7.73177	5.88803	5.66696	4.42346	4.53655	10.5847	4.12432	5.92054	4.67979	8.28472	5.96837	4.13799	7.59276	6.51944	5.64505	13.2	6.42881	6.89538	7.67239	4.3238	4.9073	6.70046	4.72055	7.89464	5.16285	9.01273	5.2779	5.99311	6.95837
PAF1	25.9153	23.8228	18.6438	21.6669	19.1349	13.5509	19.5077	28.674	20.2035	20.3475	28.2019	20.9825	22.3125	28.0762	20.0226	25.2343	25.3478	25.1441	17.1071	27.885	19.4633	35.0201	28.4384	29.769	24.5454	17.6006	27.9303	31.6091	11.7412	27.2291	25.4706	27.692	18.9491	21.9483	29.258	27.8674	33.5616	28.3323	28.2954	21.7726	15.9886	20.0857	17.147	16.8867	28.2643	17.9085	27.8994	23.4696	19.3015
VPS41	11.58	12.6161	6.43643	11.5417	8.87603	8.01963	4.79853	10.6051	3.74197	3.12387	7.55516	4.25618	6.8237	6.95689	8.6407	6.9067	11.8076	10.3289	10.1706	6.59295	6.62865	5.2881	8.98397	5.13623	14.4145	10.4568	10.0955	7.84418	12.0147	8.84102	3.99881	9.09282	8.70127	5.02837	5.23143	2.3732	9.88659	9.06337	7.12677	5.45851	12.3762	12.4716	3.00411	13.1122	3.38346	7.09671	12.0311	9.05201	15.9917
ARHGAP44	1.18564	1.1846	1.30801	1.268	1.31508	1.38244	1.20332	1.24894	1.32086	1.1984	1.34311	1.26153	1.19547	1.36312	1.32742	1.21116	1.24014	1.23333	1.68833	1.21694	1.20349	1.2009	1.157	1.25532	1.2943	1.2529	1.38097	1.21453	1.28654	1.21884	1.17503	1.27162	1.2034	1.16114	1.21323	1.17417	1.16468	1.27084	2.54341	1.21824	1.63883	1.48696	1.29766	1.22884	1.19495	1.28645	1.22341	1.15597	1.36131
ELAC2	10.5084	4.47525	9.69535	12.356	7.456	9.43109	6.48886	12.6319	8.78996	9.93282	11.7446	18.8787	7.87216	7.5428	13.2263	9.51126	14.751	12.7137	8.57572	10.2387	8.50963	13.2859	10.6816	10.5599	17.59	7.9336	10.3809	10.7161	10.3252	11.7398	10.8943	11.5566	9.39919	10.2379	9.43718	8.95022	18.8316	10.6152	9.61442	13.8441	6.99683	8.59041	2.33039	7.19341	11.5032	15.4867	13.9668	10.0622	10.2505
SCIN	6.66433	1.36452	0.796945	3.5276	0.734424	0.77562	3.11969	11.216	0.759799	10.7001	2.10873	1.26203	3.75934	10.8037	18.7143	0.760181	0.82102	0.850599	0.747647	0.761633	6.94086	1.00843	0.803747	0.740921	0.760028	17.8464	9.09293	0.944992	0.757659	0.741685	0.806728	0.931463	27.5665	1.45035	0.745048	10.2122	0.76706	0.960737	0.75422	0.839899	0.731214	0.750092	0.773557	1.19958	0.936737	0.764614	0.78227	21.633	72.219
ARSD	6.50195	10.2118	6.31821	10.309	5.1149	4.68022	7.47453	7.69385	5.28953	4.9483	8.38811	8.06555	11.5601	9.28967	7.78385	4.1075	9.26954	17.6367	4.31802	6.48526	5.1077	10.6444	7.13284	13.1847	6.62998	6.46636	7.11776	9.37125	4.19933	9.24574	8.09118	6.6188	6.27688	4.87498	6.58873	3.5653	7.08707	7.25007	6.3065	13.6307	5.58072	5.72635	3.22323	13.6757	6.56217	9.4663	7.37772	6.31415	11.3082
PNPLA4	7.9712	6.09885	4.64992	5.82002	6.4087	4.94125	10.1942	5.58748	4.49021	6.52173	5.70992	6.81876	9.72365	9.07804	6.50221	6.64779	5.42692	15.7086	8.96555	7.5754	5.90226	8.00345	6.48284	17.259	5.84147	6.23101	4.81711	8.22202	5.75637	12.6438	7.50944	5.84841	6.57774	6.28047	6.10124	4.22905	5.46218	8.32186	5.6992	9.93983	6.93017	7.06828	3.28824	8.69914	8.4747	6.09052	6.32923	6.89152	12.402
MYH13	1.14389	1.14389	1.14389	1.14389	1.14389	1.14389	1.14389	1.17706	1.14389	1.14389	1.14389	1.14389	1.14389	1.14389	1.14804	1.14389	1.14389	1.15138	1.14389	1.14389	1.14389	1.14389	1.14389	1.14389	1.14389	1.14389	1.14389	1.14389	1.14389	1.14389	1.14389	1.14389	1.16021	1.14389	1.14389	1.14389	1.14389	1.14389	1.14389	1.14737	1.14389	1.14389	1.14389	1.14389	1.14389	1.14389	1.1475	1.14389	1.14389
ADIPOR2	16.8617	38.0298	18.0075	23.8919	17.7612	18.3683	6.82179	30.8666	11.5566	14.5881	22.4634	33.6631	22.0883	8.04658	23.9981	13.5976	24.3101	24.6393	20.6585	21.4537	8.33299	33.9241	25.9728	24.3763	56.4292	23.7216	30.8409	24.643	20.1597	25.0939	14.8754	26.992	30.8246	15.8568	12.0131	8.22575	14.6753	16.8381	17.011	29.9813	20.6798	21.19	5.68551	25.0168	9.18743	15.4945	28.8337	38.2833	30.2173
CDKL3	1.52166	1.75671	1.57605	1.60252	1.71095	1.71352	1.50456	1.55602	1.48361	1.40808	1.51173	1.44851	1.57238	1.54573	1.52974	1.40808	1.65122	1.56723	1.74513	1.66868	1.63339	1.4645	1.66022	1.45311	1.75101	1.53342	1.61465	1.50971	1.7749	1.76369	1.47369	1.77637	1.54941	1.45274	1.51706	1.40808	1.50365	1.48435	1.60399	1.40808	1.5891	1.91714	1.57293	1.61207	1.51155	1.47571	1.50383	1.52349	1.72418
UPP2	1.03061	1.04739	1.03894	1.05005	1.04908	1.03061	1.03061	1.03061	1.03061	1.03061	1.04872	1.03061	1.03061	1.09941	1.03061	1.04039	1.05186	1.04449	1.06248	1.03786	1.04268	1.03061	1.03737	1.03061	1.05548	1.04039	1.03822	1.04075	1.03061	1.03061	1.03979	1.05475	1.03822	1.03061	1.06332	1.03061	1.03061	1.04582	1.05946	1.03713	1.0381	1.06296	1.0562	1.07455	1.04872	1.03061	1.03725	1.03061	1.04703
PRSS21	0.966099	0.974101	0.974025	2.0171	0.974863	0.984541	1.00885	0.966099	1.29705	0.975396	1.06936	0.966099	0.966099	0.97913	0.966099	0.966099	0.986293	0.992466	2.56897	0.966099	0.977606	1.77135	0.978978	1.42416	2.06496	1.07698	1.09603	0.966099	0.975091	0.973034	0.966099	2.94473	0.973339	0.966099	0.976463	2.60113	1.0295	0.966099	0.972958	1.00336	0.973186	0.966099	1.0026	1.08071	1.06913	0.996047	0.966099	0.966099	0.973872
MARK4	7.89553	8.29154	9.00345	7.27329	7.49125	5.76247	13.9713	8.59304	13.1274	14.8854	9.50898	15.4938	15.6329	17.3364	10.3534	12.2634	7.7017	8.19665	6.69333	8.17077	8.27921	14.5583	8.23042	12.7202	7.66578	11.7896	8.66748	12.9946	5.37151	10.4008	16.9061	6.46841	14.7018	11.1357	11.2848	22.0994	10.0878	9.0314	12.0637	11.8097	7.98413	7.57097	8.29077	8.27676	17.4729	12.9259	7.87462	12.7436	9.45866
PROM1	1.30106	1.48068	1.30615	1.60197	1.32256	1.30598	1.3146	2.20789	1.29597	1.29564	2.30981	1.31566	1.34274	1.31255	1.33413	1.29556	1.43933	1.34463	2.96201	1.31386	1.30664	1.29827	1.294	1.29597	1.33044	1.32182	1.29851	1.32863	1.34406	1.52697	1.29031	1.32937	1.41126	1.29449	1.29622	1.29794	1.29334	1.40322	1.32338	1.30967	1.29433	1.31427	1.38697	1.29326	1.3196	1.96582	1.31378	1.35169	1.39403
CCDC124	33.8097	23.0567	46.9624	27.7378	34.4073	29.8156	45.3655	30.9136	61.5279	56.6836	58.2754	60.9519	40.4515	59.8095	20.666	64.9962	28.6743	45.1558	22.3855	38.7637	30.2464	65.8332	38.0055	59.3714	28.5613	19.968	35.8241	55.3067	21.7047	35.7433	59.877	33.7746	29.5417	72.1748	66.9394	50.9402	50.5696	41.099	51.0526	51.4842	18.924	25.688	64.482	17.4815	52.5291	35.1484	34.6768	38.4598	28.2323
CEACAM21	0.952704	0.999468	1.0625	0.978861	0.957267	1.16189	0.960156	1.35464	1.06577	0.905789	1.34939	0.940842	0.929817	0.935368	1.01315	0.914913	0.91651	1.15862	0.956582	0.896512	0.942211	1.03597	1.10105	0.896512	0.935444	0.951564	2.55171	0.915674	0.96814	0.924114	1.00023	1.62458	0.939474	0.911188	0.947838	0.923126	0.907006	1.00418	0.984868	1.01977	0.92457	0.995666	0.944796	1.05163	1.04996	0.985629	0.991104	0.944948	0.981371
PAFAH1B1	7.82722	8.51555	5.70697	11.4337	6.36592	6.67523	3.60968	11.2712	3.95833	3.78347	5.9872	5.71264	5.11062	4.14964	7.26033	3.33267	11.3425	10.8742	6.28526	6.91146	4.1276	5.84035	10.0449	4.89207	9.38968	7.02563	10.0508	7.99817	7.80633	7.65374	4.79075	13.1216	6.15556	4.33054	4.69655	2.77274	9.43514	8.47537	5.61078	5.04389	6.87786	8.52925	2.29462	8.84843	3.75309	6.95661	11.7505	6.04926	8.73326
NOS2	1.09675	1.00058	0.975288	1.17975	1.08733	1.10511	0.948083	1.11315	1.06779	1.11997	1.05376	1.21163	1.05024	1.03775	1.41617	0.939423	1.14726	1.07468	1.18373	1.00778	1.0956	1.17546	1.11131	1.00403	1.13323	0.980959	1.15139	0.975135	0.97935	1.14856	1.37241	1.02778	1.26167	1.02763	0.988776	1.00487	0.98571	1.07369	1.51472	1.80501	1.08281	0.955899	0.996439	1.02686	1.06886	1.06242	1.17722	0.967701	1.21148
DNAH9	1.04735	1.05352	1.0645	1.04853	1.06649	1.05615	1.06096	1.0664	1.06277	1.04726	1.09706	1.06078	1.05053	1.06994	1.06604	1.05624	1.05307	1.04744	1.08736	1.04953	1.04953	1.05116	1.04826	1.05026	1.05779	1.06005	1.0557	1.05271	1.05715	1.04663	1.05198	1.04581	1.07765	1.05289	1.04899	1.05216	1.04472	1.06169	1.0684	1.0782	1.06332	1.06804	1.0498	1.04908	1.0518	1.05924	1.04735	1.05343	1.05869
KIAA0100	14.7382	16.0483	12.6565	15.8324	8.8173	9.04154	7.84501	16.5741	11.1695	10.9583	12.5061	19.2787	11.6106	9.53497	12.255	10.2654	20.3842	16.2055	12.8719	10.0757	6.95829	15.7666	14.243	11.062	20.1404	13.041	13.6601	10.6328	9.83477	8.54429	16.0428	11.6407	13.9448	10.9203	11.2126	9.47941	23.1161	14.4101	11.7327	14.7402	17.3373	8.43538	3.37963	11.0488	12.0387	20.9108	16.4971	11.0111	13.6738
SLC13A2	1.17883	1.17883	1.19099	1.17883	1.17883	1.17883	1.17883	1.18639	1.17883	1.17883	1.18544	1.17883	1.17883	1.17883	1.17883	1.17883	1.18917	1.1839	1.17883	1.17883	1.17883	1.17883	1.17883	1.17883	1.17883	1.17883	1.17883	1.17883	1.17883	1.17883	1.17883	1.17883	1.17883	1.19022	1.17883	1.17883	1.17883	1.17883	1.17883	1.17883	1.17883	1.17883	1.18812	1.17883	1.17883	1.20171	1.17883	1.18419	1.17883
GAS7	2.6307	3.87511	2.08016	5.56905	3.22278	1.44223	2.21692	5.37102	5.31323	5.09949	5.81662	3.73518	4.16275	4.1213	7.95847	2.32595	5.46433	11.4111	1.32419	1.84807	3.6065	6.33473	5.20251	4.085	6.93505	8.66482	5.17315	2.53092	1.36687	1.35354	2.24027	6.83527	3.99416	2.58324	3.73264	3.44608	9.08869	4.08423	5.07629	3.45671	4.09117	3.5887	2.32102	5.20181	3.26585	13.6846	7.6219	3.02036	4.49107
TRAPPC6A	35.4145	11.0783	27.6377	12.1061	23.1943	16.6813	23.8825	18.6706	22.03	39.6258	25.7047	48.3439	41.5795	44.1791	42.6141	55.25	11.7927	14.433	30.4605	36.1052	48.5233	26.6089	17.7921	41.8798	16.9278	25.3252	15.8911	38.7706	17.7832	21.4709	31.7867	13.4958	29.2643	53.8843	26.5299	44.5022	55.9958	28.1958	23.0901	42.4504	10.2774	23.128	22.0706	46.3238	19.0787	32.0782	14.9197	33.6172	33.51
MATK	4.2515	2.86295	1.13772	8.90614	0.91192	2.38397	1.77545	14.2312	0.88141	1.62932	1.87853	1.03442	3.59909	1.13543	10.0687	1.16816	7.23145	1.20249	1.55813	25.5627	8.44772	4.1917	2.74236	5.5112	0.960246	3.69299	3.27839	23.9169	0.877969	2.43421	3.45663	7.69614	1.04405	1.12916	1.35833	0.908861	1.67918	6.40944	1.52265	0.921708	0.81909	0.944953	1.44015	1.02524	1.32698	1.24692	21.3629	0.874834	0.89158
CEACAM7	1.08227	1.08227	1.08227	1.08227	1.08227	1.09536	1.17284	1.09623	1.09652	1.08227	1.08227	1.08227	1.08227	1.08227	1.08227	1.08227	1.08227	1.08227	1.08227	1.08227	1.08227	1.08227	1.08227	1.08227	1.08227	1.08227	1.08227	1.08227	1.08227	1.08227	1.08227	1.08227	1.08227	1.08227	1.08227	1.08227	1.08227	1.08227	1.08227	1.08227	1.08227	1.08227	1.08227	1.08227	1.08227	1.08227	1.08227	1.08227	1.08227
CD79B	13.224	10.5027	1.46856	4.64923	3.87415	1.80333	2.29911	19.31	3.88663	0.613817	12.4899	1.01775	2.82843	1.63846	-0.222057	1.78774	6.79453	-0.0602996	3.68325	10.4608	6.71449	17.7579	11.4869	8.79664	4.05744	1.31654	13.0408	9.82882	1.23855	0.18675	8.07703	16.8148	8.19344	9.58435	20.0072	3.1502	19.2386	4.82035	9.82106	2.75265	4.18922	2.97946	4.28181	0.266411	2.45622	0.0678282	22.3462	9.1846	0.333823
SCN4A	1.13321	1.21519	0.98434	1.00626	0.965872	0.955273	0.983216	1.14084	0.965953	0.960011	0.969967	1.00666	0.963062	0.981128	1.29532	0.973902	0.988837	0.98145	0.960493	0.986588	0.994618	1.07074	1.00329	1.00088	0.966033	0.980807	1.01726	1.01622	0.966434	0.972697	0.996465	1.077	0.964588	0.966916	0.974303	1.00891	0.974865	1.03733	1.03605	0.999837	1.05131	0.955996	0.972697	0.969245	1.03035	1.01598	1.26296	0.962339	0.973661
ST7L	3.02495	4.58016	2.84265	2.45109	2.98755	2.97087	2.26199	4.12101	2.18971	2.24159	2.66618	2.85519	2.27996	2.60903	2.60101	2.31315	2.28628	4.81799	2.79594	2.28628	2.28466	3.34575	3.67028	2.22411	2.73523	2.59203	3.40412	2.27057	2.71054	2.21626	1.89035	3.14435	2.07597	2.52516	2.6155	1.94758	3.22076	2.54864	2.63493	3.00163	2.72681	2.75465	1.77581	2.94343	1.69785	2.48768	3.83469	2.91518	2.09168
TKTL1	1.3134	1.58204	1.03422	1.23139	0.943288	1.26771	0.938151	3.29957	0.902916	0.964465	1.71496	1.79255	0.9915	0.945991	1.08207	1.12893	5.13507	1.35566	2.29153	0.912017	0.963654	5.12786	1.08549	1.20508	1.02719	0.988256	2.41706	1.31655	0.938602	0.930401	0.966088	1.72442	1.45038	2.31973	1.0325	1.07089	0.916884	0.950587	0.930041	2.93027	0.916884	0.928238	0.902916	1.45281	1.02755	1.02133	2.75527	5.26655	1.02079
PAX6	1.43418	1.68355	1.43534	1.72301	1.42951	1.42951	1.42951	1.88298	1.43204	1.43398	2.32712	1.43165	1.43146	1.42951	1.49735	1.42951	1.4818	1.44234	1.52942	1.42951	1.50221	1.45692	1.43573	1.43184	1.60114	1.43398	1.43301	1.42951	1.43398	1.42951	1.43593	1.42951	1.44001	1.42951	1.46975	1.42951	1.43729	2.47328	1.45789	1.42951	1.42951	1.43884	1.48277	1.43457	1.55469	1.52767	1.43262	1.43631	1.45225
RPUSD1	14.6729	5.6974	15.3621	7.84352	12.0834	15.73	15.9454	10.7606	24.2582	19.1611	15.6882	10.9469	13.6237	10.4793	13.6724	15.5629	10.0584	8.19141	4.59145	8.25672	14.0911	13.7876	7.44693	12.7064	6.421	9.01477	12.8429	13.4776	12.6793	5.32466	12.8691	8.62657	10.1289	13.2199	13.3618	12.9301	9.13069	9.19859	19.0761	12.9161	18.05	8.05485	13.7057	3.47004	18.0843	12.444	14.1882	8.54159	5.38433
RHBDF1	3.16533	8.74374	3.85247	8.6071	3.43847	3.12492	3.67012	6.15935	5.55111	6.04901	5.23051	6.77886	7.17822	6.97608	7.344	3.83989	8.7544	6.99502	5.31961	8.02248	5.67841	8.6209	7.59851	8.29677	9.96274	7.94165	9.04395	6.94388	1.74335	12.1024	9.60733	9.87464	8.76092	4.78499	6.0773	6.76214	7.91995	6.78055	4.94349	5.9198	2.09869	3.53808	3.16034	4.68523	4.78906	8.70402	9.54	8.65372	4.70455
LUC7L	3.78354	10.3646	4.70292	8.0693	7.58668	5.28888	5.02881	5.93147	4.85889	4.17715	6.06763	4.50851	6.6505	4.67149	8.88789	4.99336	8.51031	6.72717	9.17062	12.8366	12.4869	4.97432	7.04812	6.34273	7.52758	5.60528	8.36721	6.25488	6.0039	9.9167	4.81797	11.4006	6.6139	5.42982	7.58329	4.72859	2.7599	5.66076	4.65839	4.31902	3.96155	12.1852	5.14532	6.2696	5.99273	5.39106	7.49298	4.52608	9.25808
CACNA2D2	3.86036	4.11287	3.30669	2.46591	2.97635	3.29439	4.27295	4.55465	3.39646	1.88278	4.26396	2.7969	2.655	3.70368	1.89214	2.3285	3.53727	2.93743	1.7373	2.53053	1.9317	6.35976	2.13143	2.95175	2.97571	2.08793	6.27908	4.21301	2.53035	2.24819	3.11945	2.8059	4.13729	3.70726	2.65279	3.20086	2.72062	3.1758	4.9621	5.88834	4.24441	2.94698	4.01282	2.21817	2.37541	4.03926	3.86229	2.66977	3.0574
BAIAP3	1.0286	2.65335	1.65019	2.21936	1.25172	1.40706	2.68188	1.01711	1.68632	2.61151	1.26199	3.1088	3.43431	3.77869	0.59301	5.0427	3.15246	1.02799	5.74067	3.09952	1.61846	0.961504	2.98617	2.79789	7.44613	3.59566	2.41897	1.28953	1.29402	6.04693	5.74789	1.24388	4.28601	1.84851	3.10233	4.45261	3.57238	2.70538	2.39775	1.24221	1.27873	3.29943	0.944616	1.05401	3.25531	7.18421	1.27857	1.12658	3.41552
TSR3	32.962	13.083	28.2218	19.319	22.8263	17.2762	30.6856	21.645	35.2843	56.8834	35.6904	42.0389	35.2559	30.4404	34.2781	47.6698	20.5723	29.1665	17.3968	27.5809	27.3207	40.4399	26.0103	39.079	34.1235	18.9333	36.6297	52.2715	12.8303	21.906	44.9327	19.4545	26.9879	35.3989	38.1826	38.3442	40.7691	32.8396	39.622	38.3332	29.3193	18.1572	25.7915	22.0939	46.7801	46.193	22.2987	31.8743	31.8503
PIGQ	5.0761	5.30232	6.22492	5.30688	5.46591	4.55594	7.00364	5.13492	9.08557	5.94902	8.0865	12.2195	7.58916	9.07591	5.51454	11.1059	5.08196	8.52349	6.42086	5.48303	4.65372	14.1545	7.23503	8.44702	6.06665	3.59787	14.6483	7.74013	2.78879	6.13719	12.5854	6.60683	9.57096	8.56724	9.95948	15.5752	10.4526	7.44497	8.61251	10.2539	4.13941	5.53729	8.73038	4.62693	11.4727	10.6282	5.97367	7.61138	4.96752
TEAD3	4.0161	5.98477	8.07435	4.13011	9.74829	8.17901	7.36596	5.46638	12.497	14.7947	8.79976	18.651	9.81944	8.96836	6.15352	7.11041	5.8361	4.00567	5.00273	4.67411	6.23948	7.44823	4.43144	5.06177	4.9325	11.1151	6.83193	6.45094	5.29746	8.42421	6.32021	4.90643	13.5813	9.16189	4.49354	10.3401	7.38053	6.95453	8.41233	7.67526	6.5234	6.77581	3.87739	11.3042	6.71631	16.0461	7.57168	11.8811	10.4148
SELE	1.21689	1.17808	1.17014	1.33492	1.18743	1.17014	1.19131	1.24812	1.19996	1.17931	1.26417	1.2056	1.17843	1.18302	1.17014	1.17014	1.28358	1.50428	1.25429	1.17702	1.23877	1.20737	1.18937	1.17014	1.17014	1.26188	2.04449	1.17967	1.18814	1.20454	1.17879	1.33704	1.17014	1.17014	1.20101	1.17014	1.19114	1.18443	1.17014	1.22554	1.1772	1.17773	1.17014	1.2116	1.20419	1.18496	1.28376	1.19096	1.34762
DNAJC11	7.91852	10.1996	9.32604	6.63945	5.87686	6.5292	6.07196	9.49938	7.51867	10.6567	8.48523	9.79261	9.09445	5.13819	5.41731	7.76029	11.1815	8.28519	3.76577	3.8555	3.20794	9.19412	8.2092	4.17164	6.24261	9.74448	6.95536	5.47385	7.34656	4.5532	7.6951	6.88029	4.72963	7.46498	6.03424	9.64635	5.72357	8.18799	8.67231	8.34413	7.96758	7.73661	2.41527	6.99015	5.59698	6.80932	10.0756	6.35617	5.37966
FMO3	0.935873	1.91462	1.09034	2.03566	1.2945	1.0006	1.12593	1.65932	1.02837	1.12206	1.18868	0.997593	1.17613	2.91856	0.995444	1.02493	1.36103	1.28015	1.1708	0.923323	0.920314	1.00206	1.00928	1.06602	1.11811	1.23931	5.5389	0.94275	1.16728	1.0398	1.08519	2.72919	1.07307	0.934154	1.0055	0.948681	1.02132	1.51172	1.11304	1.01358	1.09688	1.06404	1.26622	1.30207	1.01625	0.944039	1.08579	1.13032	1.21129
MYLIP	6.99436	13.3517	12.1585	8.21662	17.2635	17.0296	7.80943	12.7998	7.32933	15.1096	10.4635	33.9909	18.5682	8.03817	26.6045	7.23003	11.6765	12.22	8.36805	9.85101	11.0448	7.12319	14.22	4.11069	18.9473	67.0328	10.4978	8.17591	23.6819	16.1873	4.64199	11.0068	19.5588	7.74124	5.49077	6.0685	4.70356	12.5987	11.7804	9.44854	15.4773	19.9752	2.74012	33.5039	4.24934	13.263	9.18936	17.05	34.2795
NOX1	1.21319	1.28986	1.20826	1.34596	1.28809	1.25218	1.18853	1.33632	1.10778	1.14546	1.14939	1.08435	1.2249	1.07256	1.35451	1.07218	1.41068	1.39828	1.31005	1.68724	1.4986	1.13867	1.36383	1.3018	1.17497	1.21666	1.18522	1.24779	1.19076	1.25495	1.16449	1.51147	1.19084	1.12573	1.3206	1.07387	1.09583	1.24193	1.28385	1.08944	1.15963	1.18969	1.29718	1.36376	1.22297	1.18522	1.36429	1.20679	1.32538
E2F2	1.2347	1.40995	1.01673	1.14353	1.12346	1.21455	1.04559	1.72321	1.05415	1.13894	1.37067	1.13069	1.36297	1.0011	1.19448	1.10354	1.61594	1.4336	1.01471	1.1191	0.994328	1.53558	1.44527	1.14119	1.1051	1.1338	1.912	1.12081	1.15566	1.24722	1.18032	1.53045	1.11863	1.30836	1.3387	1.33271	1.10666	1.07375	1.07188	1.08729	0.956523	1.048	0.961424	1.08145	1.06348	1.158	2.0458	1.12805	1.01206
PSMB1	17.3375	23.145	39.7426	51.7906	36.9761	27.1654	34.728	29.4125	33.4842	8.62603	32.3779	30.7357	10.5881	37.1911	16.8744	16.6296	32.8403	63.6776	41.751	64.1472	17.3442	19.0402	56.5	22.2305	56.9935	24.7959	65.2423	19.7041	24.1811	53.4677	32.7808	41.5613	31.6987	33.9554	41.571	15.6336	62.416	26.4617	38.5235	32.8946	27.6147	38.0368	22.1294	38.4254	21.3494	26.1187	30.0048	41.2694	33.192
SYN1	0.9845	1.06398	0.96303	0.997214	1.02896	0.958386	1.12504	1.33433	1.43863	1.2046	1.26718	1.05058	1.61564	1.66985	0.934937	1.66063	0.949707	0.962649	1.00201	1.73448	2.28766	0.929684	1.04251	1.13075	0.924964	1.09474	1.13189	1.08804	0.909661	0.984195	1.79379	0.968512	1.45104	0.94689	0.970872	1.99371	1.01137	1.15892	1.32542	1.41655	1.22744	1.00528	1.62318	0.95496	2.78945	2.23079	0.966989	1.49459	1.15785
JARID2	6.39969	5.26229	8.04482	4.01301	8.146	6.88367	4.57732	7.21416	6.09699	8.53522	6.60969	12.587	12.0465	6.40817	26.2467	7.48899	6.14564	3.90053	6.94117	3.77583	8.85051	8.29727	4.46164	3.05162	11.289	15.1832	5.2532	4.36557	9.20162	4.01836	3.35363	4.20621	16.0509	8.40097	3.65167	7.01058	4.65934	3.9449	4.88537	12.0456	5.12888	8.94711	3.46695	12.9326	4.26539	9.76991	5.77284	10.2823	10.7925
CDKL5	1.01338	1.18785	1.16838	1.24656	1.23477	1.13727	1.06578	1.12723	1.12587	1.08001	1.17195	1.08639	1.19485	1.16541	1.05993	0.97315	1.18093	1.1896	1.18701	1.02585	1.00243	1.02745	1.12404	1.03536	1.06913	1.25493	1.08115	1.08244	1.24291	1.28352	1.04175	1.08639	1.2134	1.03262	1.03757	1.01102	1.04936	1.24816	1.24717	1.06989	1.38627	1.39175	1.00661	1.37426	1.08647	1.16595	1.0962	1.06297	1.49069
CAMK1G	1.21968	1.03524	0.96889	1.32769	0.94336	0.950469	0.950239	1.23826	1.13224	0.93434	1.19293	1.27227	1.10128	1.22182	1.39098	1.04953	1.03187	1.2644	0.940914	1.34305	1.08966	1.31194	2.0381	1.17787	1.04716	1.12589	1.35299	1.42691	0.933652	0.98219	1.26318	1.12513	1.16037	0.92983	1.11443	1.06321	1.40092	1.38792	1.06245	1.07422	0.966673	0.939538	1.01315	1.12222	1.33984	1.04525	1.01391	0.965986	1.22091
NADK	9.94175	12.0514	5.71443	7.0198	6.17992	7.06322	4.52237	12.5558	6.29485	6.19084	8.11548	5.70451	5.23031	4.82418	4.14166	5.20551	10.67	10.9069	3.47164	2.58438	3.26171	10.8125	10.1896	3.67868	5.05548	6.36864	14.5806	4.04428	6.29263	2.96234	4.89141	13.4203	3.30384	5.22024	6.28058	3.97713	4.97169	7.43707	7.80878	9.09836	7.10428	6.99882	2.02509	5.76494	3.67509	4.01498	12.6561	5.16392	4.32442
TFAP2B	1.12857	1.20678	1.12857	1.135	1.12857	1.12857	1.13233	1.35544	1.12857	1.12857	1.15269	1.12857	1.13149	1.13767	1.12857	1.12857	1.13091	1.13316	1.137	1.12857	1.13258	1.12857	1.12857	1.12857	1.12857	1.12857	1.13108	1.12857	1.13174	1.13099	1.12857	1.13124	1.13108	1.12857	1.12857	1.12857	1.12857	1.12857	1.15495	1.12857	1.12857	1.13124	1.1456	1.12857	1.14059	1.29609	1.12857	1.12857	1.19927
TFAP2D	1.21304	1.22453	1.21304	1.21304	1.21304	1.21304	1.21304	1.22709	1.21304	1.21304	1.21304	1.21304	1.21304	1.21304	1.21304	1.21304	1.21304	1.21304	1.21304	1.21304	1.21304	1.21304	1.21304	1.21304	1.21304	1.21304	1.21304	1.21304	1.21304	1.21304	1.21304	1.21304	1.21304	1.21304	1.21304	1.21304	1.21304	1.21304	1.21304	1.21304	1.21304	1.21304	1.21304	1.21304	1.21304	1.21304	1.21304	1.21304	1.21304
DLEC1	0.999681	1.04984	1.07262	1.07044	1.19875	1.13475	1.09369	1.01197	1.11865	1.01749	1.03187	1.02705	1.03475	1.14229	1.04136	1.01282	1.02231	1.02643	1.09315	1.0433	1.07977	1.00637	1.07511	1.01228	1.01858	1.02837	1.03872	1.00925	1.40077	1.0318	1.01344	1.03063	1.02651	0.995481	1.08786	0.99797	1.02138	1.05442	1.12674	1.00326	1.14307	1.28047	1.04688	1.0636	1.12884	1.06391	1.02044	1.00178	1.5552
CYTH3	17.2231	13.1829	6.84068	13.2095	6.17625	5.67266	3.29735	9.66009	5.28494	3.85101	6.22974	6.575	8.54798	11.6588	9.00592	7.14197	5.6315	7.3811	6.23042	7.89694	7.43215	7.38506	8.68158	4.56413	8.05116	9.96974	7.75086	6.83931	3.59149	11.4966	6.65314	13.2147	11.0661	4.60225	7.09708	2.6101	10.354	12.8644	10.4594	8.56122	8.27523	6.52258	2.10095	11.361	4.68008	11.2726	5.7209	6.17724	12.5445
ADAM22	1.06421	1.27255	1.07614	1.20713	1.1521	1.08165	1.04576	1.19117	1.05638	1.047	1.13621	1.05808	1.06204	1.10451	1.09552	1.04088	1.27766	1.19194	1.07242	1.12141	1.09405	1.0732	1.18589	1.09381	1.12443	1.11056	1.09916	1.10769	1.07909	1.08521	1.11598	1.10063	1.07792	1.0463	1.11141	1.03615	1.09761	1.13365	1.18892	1.05312	1.07808	1.13373	1.08754	1.18039	1.04297	1.11513	1.40261	1.08885	1.12606
SYPL1	19.3752	28.5697	13.519	24.7134	17.7267	16.7436	10.2047	23.6986	9.73271	7.64913	13.5979	11.1031	11.406	14.5199	17.4421	8.49156	24.8053	23.4281	27.2042	17.2317	8.03467	13.266	28.502	9.53304	25.3072	18.0062	22.8977	14.4161	21.0092	15.3942	11.969	26.2617	17.8181	11.0824	6.905	4.92491	22.6641	19.7696	20.7081	12.0391	23.1251	19.9388	3.80195	19.6597	6.44674	9.31671	28.4897	18.5573	20.6724
CYB561	3.16181	4.24764	2.96985	6.33184	2.97697	4.11694	2.96451	5.36712	4.24617	6.63338	7.05287	11.389	5.21855	5.49658	5.97863	4.80332	4.02258	5.49016	4.10101	2.90195	3.71973	6.0634	5.40842	3.31269	3.41084	4.74957	8.92299	5.3897	3.59049	2.53745	4.42467	5.83734	4.76272	4.24161	3.29993	4.13968	4.02792	5.24075	7.95386	7.65023	4.29621	3.27665	3.59258	5.90918	6.47383	7.8964	6.08814	5.9156	4.84554
SPAG9	6.24733	11.529	6.3317	12.7863	7.14269	8.28188	3.95401	8.38858	4.32238	4.86477	5.88505	5.37628	6.22118	4.99602	11.2746	2.7912	9.7264	11.8013	8.44445	8.74918	6.57622	5.4573	10.5368	5.99862	19.5901	9.34721	9.78845	8.85787	13.3511	9.66688	5.14716	10.2477	8.94492	4.45516	5.11218	2.53418	8.90376	8.66633	5.86821	6.92051	8.19674	11.1023	2.52206	13.1291	3.20126	8.30558	8.3318	8.01854	17.0506
CELSR3	1.02976	1.0557	1.2083	1.05487	1.11045	1.16419	1.17749	1.09094	1.1852	1.08182	1.17456	1.06834	1.1569	1.10593	1.14711	1.04792	1.0547	1.03503	1.08651	1.04131	1.2042	1.00615	1.02909	1.01461	1.12694	1.08241	1.07362	1.04708	1.43346	1.03168	1.03394	1.07337	1.09053	1.05604	1.03143	1.12978	1.04867	1.0275	1.30992	1.07537	1.13154	1.19482	1.04901	1.04474	1.04951	1.3203	1.09404	1.11229	1.16326
AASS	3.19775	5.83032	2.70122	4.37761	5.54075	3.67357	1.78638	2.76563	1.96776	1.80858	2.54196	2.181	2.29923	3.29613	3.13954	1.90069	3.09451	4.80408	2.63783	3.53345	3.49509	1.93568	4.39957	2.42609	3.70252	2.7195	3.57825	2.5524	6.19293	2.35901	2.6485	4.35376	2.13934	1.84373	3.57393	1.54474	3.11082	3.79478	2.59617	2.19928	3.33944	8.26974	2.40224	6.70437	2.10058	2.92615	3.02868	2.14923	4.63297
PLEKHG6	1.16262	1.30016	1.068	1.2438	1.02892	1.08294	1.03934	1.42961	1.06333	1.04496	1.07883	1.08843	1.03563	1.02165	1.04606	1.02933	1.16138	1.26286	1.33321	1.10214	1.05031	1.51957	1.09117	1.1788	1.15864	1.05236	1.35748	1.23008	1.03659	1.16591	1.14465	1.38984	1.06964	1.02165	1.15905	1.06621	1.08308	1.11778	1.06141	1.05264	1.17427	1.04715	1.02165	1.03893	1.15	1.02165	1.28562	1.02741	1.04743
SS18L2	5.11292	5.39361	5.49583	4.81486	6.4666	5.57828	4.72182	5.17451	5.14239	4.89316	5.6632	4.85211	5.4105	5.45097	6.0212	5.05987	5.1534	5.27566	4.67431	5.30223	8.21586	4.4019	5.17202	4.75526	4.16806	5.13056	6.22399	4.92221	5.56098	4.64037	4.18412	5.68323	5.27408	5.28095	4.82007	4.5196	5.01707	4.80319	7.42976	5.6296	5.51595	6.57909	6.27962	6.84496	4.1727	5.54426	6.1639	6.24402	6.07392
MPND	8.75888	4.95631	6.66963	5.42844	8.05076	6.05016	8.2044	6.21478	8.42187	11.6831	7.79376	10.9147	8.78106	12.6421	7.72581	8.33041	6.10114	8.91221	4.61556	6.29946	6.01062	11.9301	6.40858	9.34838	5.89823	5.10582	6.37885	13.5855	5.37123	3.89623	10.6392	5.62839	7.41814	8.30224	10.8691	12.2952	14.7702	8.93999	8.84932	9.06554	6.32748	5.36469	6.74092	8.67871	9.67683	9.02942	6.89682	6.58362	6.44189
MGST1	1.51131	3.38207	1.6166	5.89105	2.52362	2.51579	1.78778	6.00678	1.6412	1.7048	2.42885	2.23164	1.45705	2.01743	1.85471	1.42833	4.10233	7.09654	2.04298	2.04986	1.73463	2.48185	4.44517	2.73531	2.30078	1.58298	1.51068	3.26571	2.72463	1.73186	2.85365	3.90812	1.96807	1.54161	2.19549	1.81642	1.70267	2.24873	2.32293	1.67459	2.2939	2.29018	1.52903	1.55284	1.79253	1.52642	10.5028	1.43853	2.51808
CRY1	4.11243	5.10805	4.64501	4.65154	6.1588	5.34288	3.78265	5.11363	4.1964	3.45424	5.14643	4.57255	3.95548	3.90002	5.24577	3.30785	4.71576	4.09277	4.87847	4.73972	4.30244	3.21374	4.95892	3.44814	5.68108	4.81004	4.59582	3.40083	6.76307	4.15716	3.63205	4.96673	3.90998	3.78814	3.48265	3.01026	3.60088	4.01902	4.60449	3.82291	5.6384	6.13862	3.435	5.42444	3.52507	4.71301	4.21778	4.28527	8.00803
PGLYRP1	0.937102	0.961206	0.937102	0.964934	1.01629	0.937102	0.937102	0.937102	0.937102	0.993428	0.963111	0.991025	0.937102	0.97653	1.02581	0.937102	0.957396	0.996907	0.937102	0.937102	0.937102	0.937102	0.937102	0.937102	0.960792	0.992931	0.958887	0.966259	0.964354	1.04197	0.9897	0.983239	1.15503	0.937102	0.937102	0.937102	0.937102	0.937102	0.937102	1.01206	0.958473	1.05307	0.937102	0.937102	0.937102	0.982245	0.975453	0.937102	1.14832
NFIX	7.43779	16.9543	24.44	34.8835	14.6208	13.8096	16.3481	12.2557	24.1987	29.674	21.1443	43.8897	18.0867	34.762	5.64889	21.8916	10.8384	16.5966	12.2137	17.7874	2.45532	21.9737	36.5817	14.732	19.5103	16.5071	22.586	16.0152	10.3574	50.1515	61.0736	11.4668	23.5977	17.2036	14.7849	42.5222	13.2423	30.0056	20.0545	20.7191	11.8032	17.4411	7.36826	12.7732	31.7626	8.50495	7.80626	16.5378	22.2417
ST3GAL1	56.939	73.877	10.4548	36.203	7.72858	6.75293	6.7154	31.9946	6.0424	9.08272	3.10211	8.34586	12.3259	3.79535	10.4924	16.6274	34.8962	53.4294	19.303	28.4719	6.89208	60.1987	45.7033	50.3878	45.6889	14.1783	15.6501	51.6462	29.312	17.6378	28.4375	29.2115	27.7244	6.89071	19.5938	19.7867	11.7825	20.5357	8.1978	9.25415	18.9615	7.41192	2.32924	5.94413	14.6069	9.28878	25.2114	2.87199	19.8921
MMP25	1.19027	1.29302	1.18661	1.1897	1.17987	1.21244	1.17223	1.45783	1.17191	1.17158	1.23072	1.18458	1.18352	1.2572	1.21049	1.18523	1.23998	1.51242	1.21772	1.20797	1.23519	1.22243	1.30049	1.19157	1.17085	1.18523	2.62824	1.18604	1.19368	1.18409	1.50657	1.34046	1.2204	1.1962	1.21285	1.23973	2.34102	1.63458	1.24469	1.27734	1.17045	1.23519	1.17898	1.29042	1.20935	1.18174	1.22341	1.19449	1.22065
IL32	1.31729	1.65082	0.931141	1.80601	0.674672	1.41035	0.898169	5.31723	1.42268	0.707949	2.80097	1.78484	0.567378	1.75309	1.58929	0.575526	1.26163	1.29072	0.741226	0.772828	1.27267	2.29192	5.14582	0.903347	0.731784	0.795977	21.9281	0.658224	0.610479	0.693176	2.02266	5.27215	0.561896	0.597	2.37089	0.844179	2.67967	2.17381	2.84491	1.85216	0.520319	0.598371	2.21311	2.87788	2.98967	0.919262	1.09913	1.15951	0.571795
MAPK8IP2	6.15004	11.8644	22.6232	5.06131	12.1437	19.9279	18.7506	24.5123	14.6016	10.7286	9.35312	24.7476	18.4609	14.9121	2.80954	16.9475	17.2984	11.55	29.2603	8.1786	1.97786	35.1889	8.07784	15.0351	17.5619	5.52111	5.39783	16.986	8.96458	-0.239309	20.9072	11.7213	35.5785	14.2922	6.66391	31.0883	11.7285	1.94188	14.5207	47.7788	6.16548	14.9452	2.4407	-0.30996	12.2264	13.4677	18.1822	16.7716	10.4215
MED24	11.2311	11.3687	10.6171	9.50618	7.47506	6.29075	8.17306	11.533	9.60069	14.9549	4.19766	24.9708	11.4892	7.43347	10.7195	12.4573	13.4258	10.0182	6.82808	5.37681	6.64621	15.5773	12.4985	8.02867	13.7412	9.22972	6.97171	10.0575	6.66028	7.88048	13.5966	9.61689	10.1767	12.2618	10.7595	25.8464	12.1073	11.5816	15.1591	9.88233	5.07632	7.73396	2.49433	7.83714	3.54619	23.1913	12.0017	8.04198	12.8424
RHOBTB2	2.99243	2.90401	5.35389	4.91654	6.72635	3.67029	4.89264	3.50293	6.55516	6.33756	5.91585	6.484	6.21486	10.1768	7.74223	10.6988	3.16277	2.17391	27.1501	8.89991	5.16988	2.91699	2.37931	2.79635	3.3874	6.47308	5.44781	2.32212	3.2392	3.33121	5.02374	2.40794	10.1158	5.59708	4.69977	8.7737	7.9364	6.81347	7.49714	8.5312	8.01321	4.9386	4.64732	5.98518	11.3457	6.82813	3.65449	7.27716	5.50301
HEATR5B	5.12221	7.4533	5.08679	6.44709	5.18466	5.69694	3.96658	6.36645	4.1945	4.15102	5.00892	5.34174	4.87761	3.99077	6.10494	3.56301	7.9568	6.28653	4.92188	4.66653	4.26723	4.38249	5.67259	3.8763	5.84477	5.8703	5.8469	4.99509	7.6326	4.73555	4.34367	5.61598	5.41748	3.99646	4.07908	3.53383	5.08932	5.27368	5.27684	5.03027	6.0798	6.64876	3.14979	9.22532	3.81788	6.15688	7.38444	4.97928	7.16641
SEC62	4.39394	9.15296	5.10358	6.75021	10.4777	6.46667	4.72334	6.58046	4.1177	3.91249	5.45705	4.52651	5.28536	4.94028	10.7513	3.74437	6.94525	7.4094	6.63075	6.28179	8.08342	3.70572	6.26697	4.5182	8.14357	8.06727	7.95077	4.27845	10.3695	5.28412	2.9062	8.64699	6.84668	4.71542	3.80561	2.58836	4.6382	4.55173	6.4139	4.10979	8.90087	11.1857	4.62081	11.2053	2.94594	6.04553	8.68494	7.40839	15.7782
CSDE1	54.5923	64.785	52.1782	33.9427	76.8932	74.4258	43.2165	58.8007	45.1217	27.1249	62.0713	30.9862	46.9819	28.5616	30.7479	26.9595	58.2047	55.3839	60.6535	15.4763	33.231	31.7365	57.4936	8.6843	45.3208	91.3465	52.6665	16.8161	97.211	14.7392	7.72374	49.6286	26.9647	39.9137	30.085	14.4174	17.9751	46.4735	45.7362	35.3926	103.781	90.0705	18.5529	97.1132	14.5799	23.289	56.1644	59.3581	39.4924
UBE3C	6.54037	7.87119	5.15369	5.85805	5.43998	6.73398	3.12013	6.46301	3.12013	2.90526	4.94264	3.76069	3.5052	3.97982	5.16017	1.6807	7.06294	5.31749	5.53663	3.32044	3.11563	3.27691	5.72794	2.70244	4.81512	5.34082	5.65218	3.76953	8.11677	4.34217	2.73994	5.91849	4.51138	3.27219	2.73224	1.76195	4.3126	4.20719	4.67968	4.35681	6.42643	6.3438	1.88154	5.88595	2.17728	3.3725	7.30616	4.43913	6.56316
REV3L	4.26926	6.78351	6.53145	7.60673	5.82979	6.65736	4.0822	5.24314	4.38918	3.85023	4.90633	3.924	4.02392	4.60435	4.42648	3.68613	7.28131	7.85755	6.47539	7.59115	4.4623	4.18835	7.18155	4.14319	8.44675	4.97124	5.82512	5.34199	8.42519	8.53495	4.94264	5.59979	5.17723	4.45812	4.89108	4.11827	5.45347	5.42757	4.70722	4.13548	5.116	8.21535	3.8572	6.70031	3.99163	4.50935	5.76209	5.03469	7.51959
TENM1	1.12355	1.17131	1.12268	1.13952	1.12558	1.12878	1.12108	1.13807	1.11803	1.11803	1.13807	1.11803	1.12297	1.11803	1.1372	1.11803	1.14736	1.12181	1.12689	1.12602	1.13139	1.12341	1.12921	1.13545	1.12718	1.13676	1.14315	1.12921	1.12065	1.12007	1.1205	1.15795	1.11803	1.11803	1.11803	1.11803	1.11803	1.13487	1.12007	1.11978	1.11803	1.17378	1.12152	1.12718	1.12805	1.12239	1.16231	1.11803	1.12704
PAX7	0.972354	1.00835	0.972354	0.972354	0.972354	0.979326	0.972354	0.979703	0.972354	0.986299	0.985357	0.979138	0.978573	0.972354	0.972354	0.972354	0.972354	0.972354	0.972354	0.99836	0.972354	0.972354	1.00138	0.972354	1.00778	1.02795	0.999491	0.979515	0.992707	0.972354	0.972354	0.983849	0.972354	0.983472	1.05772	0.972354	0.972354	0.977819	0.972354	0.977065	1.12632	0.983849	0.981399	0.972354	0.972354	0.99478	0.977065	0.972354	0.978196
MASP2	1.02987	1.52451	1.05744	1.08953	1.21568	1.25651	1.08624	1.13074	1.04473	1.03408	1.03278	1.07896	1.21936	1.06525	1.10202	1.01677	1.14797	1.16697	1.07015	1.06495	1.12906	1.03852	1.19018	1.03523	1.08241	1.18842	1.1374	1.05261	1.2513	1.09413	1.03293	1.14453	1.04021	1.01677	1.09359	1.01677	1.03147	1.0772	1.07084	1.03699	1.04955	1.89063	1.0337	1.29258	1.04863	1.07927	1.10232	1.04587	1.2369
IYD	1.27387	1.27387	1.27387	1.2793	1.27387	1.27387	1.29276	1.27387	1.27387	1.27387	1.27387	1.27387	1.27387	1.31235	1.27387	1.27387	1.27387	1.27765	1.27387	1.27387	1.27387	1.2793	1.27387	1.27387	1.27387	1.27387	1.27387	1.27387	1.27387	1.27387	1.27387	1.27836	1.27387	1.27387	1.27387	1.27387	1.27387	1.27387	1.27789	1.27741	1.27387	1.27387	1.27387	1.27387	1.27387	1.27387	1.27387	1.27789	1.27387
FAM76A	2.18088	3.25317	1.80429	2.23924	2.50365	2.37929	1.6531	2.63844	1.68001	1.54768	1.93454	1.49299	1.80453	1.96249	1.99577	1.25692	2.08016	2.50604	1.64362	2.02706	1.70334	1.49752	2.46273	1.40716	1.66942	2.42515	3.31726	1.62491	2.2718	2.6757	1.33041	3.28541	1.59044	1.64713	1.71631	1.2527	1.6195	2.21193	2.54465	1.8433	2.08789	3.01663	1.68677	2.99744	1.26934	1.41791	2.48542	2.02722	2.00238
TRAF3IP3	1.15567	1.26037	1.16136	1.21888	1.16053	1.19022	1.14677	1.52513	1.17057	1.14584	1.32928	1.20098	1.15101	1.22488	1.22292	1.15215	1.21361	1.3032	1.17481	1.1537	1.19095	1.19426	1.64297	1.14625	1.17729	1.22219	3.58917	1.14936	1.18609	1.17295	1.17543	1.56589	1.14936	1.14449	1.19643	1.13942	1.24868	1.27889	1.30693	1.19509	1.14915	1.16322	1.18133	1.51644	1.2104	1.19612	1.23575	1.18991	1.21443
POMT2	3.76742	4.78693	4.19175	3.6795	3.60331	3.45349	3.01632	4.71989	3.80331	3.96758	5.55136	4.83438	4.385	2.9125	4.82129	3.86425	4.26899	4.66417	3.51403	3.64193	3.65654	5.75192	3.62555	2.89099	4.39215	4.66858	3.87798	3.78934	4.15498	2.94759	3.74936	4.36943	4.12728	3.46088	3.38211	3.90624	3.79319	3.62282	3.71499	4.983	3.55241	3.67926	2.62057	3.47621	3.71997	3.21535	5.60162	4.01046	4.06754
VTA1	3.30802	3.66328	4.72102	5.97143	4.80785	4.15609	3.35819	4.15585	3.7734	2.46432	4.07785	3.51896	2.82451	4.10528	4.65296	2.46869	4.45259	6.45247	4.97419	4.28498	3.03863	2.74563	5.13774	2.59249	6.7124	3.62448	5.33859	3.21356	5.27403	4.87862	2.82833	3.71607	4.60963	3.90491	3.24354	2.55345	4.32299	3.45559	4.76722	3.93418	4.5228	5.48203	2.77155	5.4251	2.69268	4.0629	3.95397	5.25407	5.56981
MLXIPL	1.27792	1.42811	1.3125	1.3514	1.37922	1.41136	1.43257	1.36328	1.44486	1.37922	1.47741	1.30372	1.32047	1.33465	1.29386	1.38516	1.31196	1.31615	1.89541	1.35315	1.31128	1.31182	1.84652	1.47254	1.3518	1.27792	1.31453	1.34775	1.40853	1.4639	1.31574	1.36085	1.31453	1.32087	1.33033	1.44283	1.30088	1.34073	1.31763	1.28238	1.31372	1.50037	1.34829	1.45148	1.48929	1.32128	1.34694	1.3233	1.36801
BAZ1B	9.30858	10.948	6.282	9.27111	7.48798	5.9809	4.19861	9.84231	5.41762	3.97481	7.3829	2.66746	5.99004	6.19976	7.84589	3.22663	11.3175	10.0503	7.46872	8.51075	5.34482	6.31436	9.89607	5.21011	8.42326	8.44968	9.24667	7.79236	7.79624	9.32784	4.97968	9.7702	7.96758	4.5805	5.97869	3.37535	6.28344	8.57708	8.12109	3.92044	8.49263	7.41237	2.54334	8.11866	5.3746	6.9908	9.78642	5.87886	11.2008
RANBP9	6.37662	9.5583	6.67483	8.07	8.47204	10.4521	3.85015	10.037	4.33526	4.5714	6.41525	8.55312	7.07947	3.93749	12.6246	3.71502	10.7951	8.30682	7.0242	5.22546	5.11881	5.74974	7.28477	3.01744	9.09327	10.4029	11.4463	4.76219	13.5528	6.46198	2.96865	7.24163	9.07464	5.33349	3.33198	2.59043	5.39808	5.32861	3.90688	6.95579	6.65559	11.0088	1.57654	11.4813	2.1541	5.0714	10.8941	11.5042	12.7759
ETV7	1.075	2.35455	1.02124	2.48588	1.04873	1.19228	0.859795	10.6381	2.43972	0.908642	1.48367	0.882298	0.836216	1.78543	2.79525	0.822929	1.34304	0.914402	0.906107	1.50287	1.28613	1.51101	9.41657	1.88781	0.93967	0.915477	13.4844	0.87961	1.2369	0.936905	1.3531	9.45305	0.971851	0.988364	1.98036	0.871162	4.2125	2.14917	10.2768	1.71723	1.51731	1.20641	0.967397	1.83313	1.87629	1.42722	1.7276	0.908335	0.996889
SPRTN	2.13981	2.85941	2.03256	3.50604	2.5654	2.56777	1.74682	2.85304	1.78785	1.73542	2.23471	1.61876	1.91743	1.98545	3.09994	1.60898	3.16596	3.08388	2.36913	2.48892	2.54459	1.89662	2.67037	1.9123	2.42898	2.42927	2.7874	2.47249	2.08652	2.33427	1.73618	3.04797	1.95125	1.83716	1.97576	1.4149	2.57964	2.20745	2.32781	1.79526	2.47353	2.85665	1.78396	4.01019	1.60841	1.9484	2.88639	2.25457	2.74655
DYRK4	3.99735	3.65851	3.66005	3.84557	5.11145	3.80541	3.33723	3.83553	3.93557	3.55413	3.78099	3.94163	4.09667	3.75068	4.86994	4.08617	4.13004	4.86551	4.57064	5.84529	6.65258	3.51949	4.2479	4.86515	4.45902	4.12489	4.53681	4.11457	3.55368	5.62287	3.77701	4.50985	3.88682	4.36006	4.65892	3.27119	3.18083	4.53807	5.3744	3.73992	3.85642	4.7794	4.15989	4.13818	4.44744	3.56055	4.09124	4.55472	4.22221
ZNF207	6.35868	10.2063	6.14966	8.56382	7.53687	7.65912	6.00818	8.04092	5.44805	5.24573	5.72346	7.03498	6.7948	5.91333	8.04585	4.82115	9.52615	7.43409	8.66768	9.04633	7.63481	5.4129	8.38488	7.30739	9.01002	7.35439	8.04992	7.19838	9.14488	9.47383	6.25413	9.65824	7.24831	5.9718	6.0018	3.49186	7.11314	6.62563	5.44898	5.65307	6.57216	9.34413	3.78758	8.2931	4.07538	6.88212	8.873	7.50718	8.88147
UQCRC1	54.7933	21.2562	41.9615	25.7714	39.7278	29.3687	63.8716	32.205	49.2949	61.0464	49.7556	60.932	63.4528	35.3699	41.7201	85.2632	31.1413	33.2834	23.1616	33.666	28.9074	50.0485	28.36	39.2825	29.3818	36.9801	28.4387	42.7427	25.0457	32.8674	51.1353	28.0536	49.2323	78.107	51.0863	75.5617	77.2285	36.363	54.707	55.779	33.5659	34.8131	33.382	30.5236	68.5597	49.3463	36.3827	56.9816	26.3563
STARD3NL	8.81646	11.1625	5.79732	9.11512	9.54328	6.85479	4.89558	9.29241	5.36954	5.67081	5.97392	5.64051	6.66983	8.27675	11.2706	7.14179	10.9013	10.926	6.79211	6.81866	7.00999	5.60092	9.14864	6.39004	9.17488	8.10168	9.43679	6.9444	8.27959	6.22786	6.0076	11.9012	7.63478	5.47258	5.41504	4.23436	12.4989	7.2192	8.6486	5.98021	12.3808	9.60089	5.04442	11.8549	4.45177	7.53482	11.3698	7.47398	10.9648
CD9	2.56523	4.08581	1.64144	5.46989	2.73334	3.79624	2.67641	4.51318	1.71149	2.14331	3.53245	1.68993	1.4912	3.09288	2.07126	1.44954	3.317	5.04612	8.07224	4.60602	1.78277	4.40622	4.38144	4.72786	3.48112	1.83801	4.7343	1.53847	3.91141	6.43381	3.11107	6.38808	1.92886	1.44624	2.22003	2.51444	3.98775	4.31261	2.41369	3.40616	1.91504	1.32547	1.98111	3.80483	2.08799	2.11592	4.72794	2.1496	2.50646
HHATL	-5.74433	-4.11576	-4.55864	183.239	40.6655	112.068	189.214	-5.40451	31.5164	-5.61259	10.3861	-5.44804	67.3588	-5.67233	-5.83049	16.5831	-5.88087	-5.68794	11.2023	84.0886	-5.65057	-5.18486	27.7505	-5.67545	-5.71457	12.8218	-5.80689	-5.57705	-5.74433	-5.52651	-3.41023	-5.86466	51.0449	119.891	6.21415	-5.53899	-1.56536	-4.58733	90.3645	-0.505169	66.1409	178.057	-3.76878	-5.83582	-3.66604	-5.8142	-2.24265	-5.75742	-2.76118
NCAPD2	6.85278	6.94956	8.17214	6.1931	7.09202	7.58732	4.34434	8.49434	8.41747	6.55806	9.12562	9.3336	11.997	5.21007	7.41213	6.66564	8.36669	6.77777	6.25639	7.22152	4.66414	6.76588	7.4366	5.3665	10.9107	10.1041	7.49394	7.40002	9.95253	9.77387	8.54265	5.85601	10.1571	7.94949	6.26387	8.18233	5.45918	6.48304	10.0663	7.16888	6.68547	7.38127	3.36647	5.7874	3.58973	10.9426	7.17097	8.29299	6.89831
IFFO1	5.30345	13.0542	6.10969	8.37809	8.07506	7.41019	2.77208	6.21169	7.1981	4.14463	4.84761	6.04328	5.31631	6.22385	5.92951	4.90641	12.3491	7.51008	4.31947	7.34268	8.66796	4.88273	6.76249	6.43264	5.93579	5.10744	6.63829	6.19201	6.22016	6.5827	6.23561	13.5093	5.69838	4.39537	7.94734	4.65951	4.25103	8.53937	10.0565	5.31819	6.08225	12.495	5.38233	6.71568	6.77197	6.52947	9.44902	5.66694	6.69373
GIPR	1.14885	1.36342	1.40024	1.17748	1.32568	1.23987	1.26135	1.19528	1.19129	1.14874	1.20182	1.14833	1.16521	1.22739	1.17339	1.15836	1.18106	1.18024	1.31228	1.20755	1.22893	1.14874	1.21277	1.14424	1.15948	1.17748	1.42469	1.16419	1.27996	1.14987	1.13903	1.27035	1.28559	1.16214	1.17666	1.20182	1.18301	1.1691	1.78081	1.19395	1.25307	1.27107	1.20234	1.16071	1.16582	1.19354	1.21185	1.17891	1.20786
PHF7	2.34475	1.73996	2.10359	1.48199	2.14042	2.18722	2.94709	1.50923	2.02432	1.35715	1.70075	1.3108	2.28774	1.60737	2.41918	2.05701	1.53417	1.85628	1.90339	1.73236	1.67773	1.20461	1.47232	1.477	1.66123	1.98389	1.39904	1.81055	2.16436	2.18062	1.50501	1.663	2.03207	1.43426	1.42037	1.15312	2.15408	1.63392	2.12231	1.90102	2.64032	4.02746	1.20691	2.24055	1.06687	1.55412	1.41968	2.47297	2.22551
SEMA3G	1.64497	1.56762	2.04014	1.32593	1.24376	1.21033	1.42621	1.41142	1.72486	1.1917	1.69887	1.73615	1.29128	1.94783	1.80992	1.23195	1.45806	2.00532	1.21156	1.06499	1.15354	1.35157	1.29845	1.16737	1.29171	1.54994	2.76574	1.25785	1.17813	1.06516	1.31692	1.6196	1.32829	1.27001	1.38088	1.22862	1.38412	1.39348	1.34334	1.46926	1.38202	1.28594	1.49254	1.48633	1.59343	1.25234	1.50523	1.09334	2.4333
NISCH	6.11935	8.37499	12.2737	6.18745	11.5294	9.20286	7.22421	5.51036	11.3619	11.4479	9.18342	18.9753	12.4599	10.0759	6.36393	11.1907	6.27218	6.06177	4.68791	4.7104	7.24793	6.5308	6.72048	3.93142	8.19074	12.3974	4.68646	5.04415	9.06185	4.88948	7.35387	6.08602	10.5775	9.95889	5.6211	14.3984	6.38574	6.17037	12.2448	13.3345	9.87256	15.5818	4.59242	9.86013	7.99435	10.1163	6.40206	12.6981	16.4842
STAB1	3.16283	6.25064	3.599	2.36162	3.48023	4.48082	1.76999	5.62394	4.03733	1.66948	4.70034	3.0493	2.06958	3.13724	1.31309	2.21164	2.91064	4.40128	2.42174	1.44404	2.34544	2.6455	3.97914	1.55449	1.78017	2.70546	11.5866	1.51256	1.85239	1.61545	4.07988	8.2207	1.56697	1.25459	3.22803	1.55611	3.93459	3.71145	5.04463	5.04124	2.52117	3.5193	2.60503	5.2539	3.34843	1.815	4.12751	2.15545	2.46899
FUZ	6.9474	6.51647	4.79877	6.34629	3.54703	4.48461	7.14188	7.08247	6.86483	6.01333	6.03428	7.23352	8.26617	8.23967	7.33301	9.13748	6.34698	8.17522	8.14437	11.0739	7.67901	10.7258	7.42838	9.45994	6.09156	3.82645	8.15717	10.2733	4.58639	9.885	9.65297	6.48692	8.95862	8.08038	9.73258	11.812	9.75939	4.70926	9.73006	5.44749	4.66797	4.76868	5.63884	4.40882	9.53452	5.28432	8.98909	6.19333	4.79739
SLC6A13	1.09476	1.09069	1.10927	1.2578	1.08064	1.08555	1.08831	1.20131	1.08709	1.08141	1.71146	2.98669	1.08793	1.07442	1.07181	1.06836	1.08716	1.64775	1.06836	1.08778	1.07373	1.09898	1.08939	1.06836	1.0867	1.07695	1.09192	1.08187	1.07258	1.06836	1.06836	1.07903	1.10205	1.06836	1.27592	1.11219	1.07327	1.2304	1.07795	1.07995	1.07166	1.08632	1.15916	1.08294	4.20373	1.06836	1.07427	1.06836	1.12639
IDS	2.17017	2.77582	2.06005	2.47078	2.09231	2.20585	1.89088	2.21836	1.98632	1.94341	2.18362	2.10213	2.14629	2.04464	2.23656	1.89687	2.31019	2.31505	2.05302	1.9249	1.94765	1.96026	2.33831	2.05901	1.99035	2.27875	2.25755	2.11051	2.38009	1.91549	2.06842	2.15746	2.17255	1.94734	1.88064	1.89832	2.01393	2.14825	2.19437	2.16604	2.5595	2.2346	1.86409	2.60572	1.96305	1.9492	2.10441	2.48256	2.7357
PRSS3	0.972399	1.03054	0.972399	1.006	1.02018	0.989197	0.972399	1.02611	0.972399	0.972399	0.988091	0.988694	0.987688	1.04372	0.972399	0.972399	0.996942	0.972399	0.983464	0.972399	0.972399	0.972399	0.972399	0.972399	0.972399	0.972399	0.985576	0.972399	0.972399	0.972399	0.972399	0.98628	0.985576	0.999356	1.01002	0.972399	0.972399	1.07771	0.972399	0.972399	0.972399	1.01434	0.972399	0.99141	0.972399	0.972399	0.983967	0.972399	0.986582
ZNF200	2.80352	3.6958	2.6168	3.12724	3.22573	3.01601	2.62738	3.32864	2.48247	2.56525	2.62143	2.76696	2.85764	2.75176	3.55068	2.50301	3.34887	3.22778	3.27143	3.77159	3.51001	2.82848	3.21638	2.94802	3.35893	3.18177	3.51627	2.93888	3.23559	3.32771	2.56258	3.35534	2.89092	2.59719	2.90673	2.23342	2.81625	2.9587	3.02515	2.72475	2.92707	3.5439	2.59575	3.50631	2.52304	2.64433	3.41285	3.24873	3.43452
CD4	2.11696	5.52148	2.74643	1.74727	2.0021	2.63217	1.51283	9.33022	3.26019	3.73958	12.4121	4.77129	2.54158	12.0876	1.37256	3.20824	2.38244	5.90532	0.600314	0.454795	3.01229	2.15325	5.26383	0.772913	3.67165	6.15155	21.3607	0.417294	0.837419	0.316427	5.09139	9.38057	4.69127	1.77283	1.98225	2.60426	6.56665	5.2973	5.31754	5.49881	0.919725	0.960269	6.38348	8.63062	6.66478	8.50145	2.77982	2.42382	4.12867
LRRC23	2.97073	2.28452	2.77702	2.33888	4.64409	3.17334	4.07596	1.87701	3.58394	3.4818	3.86955	3.96303	4.20468	4.17952	5.11603	4.00668	1.98224	1.69187	3.58314	3.91367	5.04794	1.55807	2.3261	2.95343	3.07565	3.09382	2.63441	3.70924	2.57521	3.05811	2.51815	3.1535	3.05073	3.02509	3.3757	3.07422	5.98096	3.16659	7.40029	2.05406	5.88835	5.00311	4.63012	3.63735	3.95891	4.78749	1.80202	3.36784	4.12397
BTK	1.2539	1.51772	1.21809	1.31304	1.27888	1.23485	1.06005	1.65165	1.24608	1.00107	1.64635	1.16243	1.07878	1.39787	3.9088	1.0338	1.6122	1.90314	1.27367	1.24544	1.83831	1.26015	1.47788	1.17294	1.66248	1.22734	5.04078	1.19192	1.14836	1.02344	1.064	1.85491	3.92003	1.061	1.11665	1.00913	1.24283	1.33257	1.28813	1.4842	1.1444	1.14029	1.16678	1.79182	1.47614	1.25548	1.32648	1.34079	1.17714
HFE	0.996424	1.10584	1.98152	1.08486	3.09479	3.89966	1.68192	1.07774	1.74792	1.48943	2.30364	1.27903	1.34855	1.59908	1.61584	1.52733	1.04313	1.19274	1.31203	1.18623	2.27355	0.966563	1.03386	1.0625	1.22865	1.84792	1.34802	0.944129	2.95001	1.08065	1.00952	1.26594	1.9561	1.54456	0.984709	1.19213	1.28033	1.21517	2.35172	1.47986	3.4627	2.918	1.1932	1.20285	1.18792	1.04535	0.992672	2.35073	2.71694
SCMH1	10.2499	10.282	11.7163	6.55706	12.5521	11.2653	13.488	8.68641	10.2738	10.2663	9.77313	13.3568	9.75979	10.2338	4.73614	9.19418	9.69727	10.4538	5.85148	8.46443	3.9191	11.6006	9.872	6.45957	7.10756	10.795	6.6959	7.23328	10.9358	6.79967	8.13952	8.50938	7.72954	10.8996	12.2651	15.3086	7.29471	11.5376	11.5483	8.85891	13.0905	13.8272	10.2087	10.9359	8.00774	6.49862	8.06143	11.6388	6.1971
FYN	3.76277	4.13927	27.5227	3.87298	13.3224	10.5205	4.75985	4.31531	19.1766	5.35801	17.8836	12.8898	3.10506	20.717	4.01665	4.03624	3.15634	8.17735	8.37727	5.4559	4.2576	3.49756	7.10817	4.93306	4.11768	8.28328	6.66898	4.42116	9.73716	18.4409	6.17913	3.86395	11.6568	9.64133	8.954	12.6896	11.2386	5.12724	14.3333	13.46	12.1219	14.5718	8.79901	12.6447	10.037	19.1705	2.92137	13.6248	21.7944
HIVEP2	2.22333	3.51162	3.28011	3.969	3.09777	2.93152	2.27386	2.45507	2.69189	1.7822	2.99035	2.03551	1.9779	2.96693	2.46948	1.7472	2.79561	2.9967	3.60094	3.39784	2.13714	1.96969	3.59965	2.24433	4.0666	2.69945	3.51725	2.57433	4.16309	3.10364	2.64989	2.50714	4.44682	2.37034	2.33952	2.03841	2.78829	2.84261	2.78813	2.0582	3.52843	2.8826	1.77134	3.88024	2.48267	3.38842	2.54817	2.84929	5.82974
FMO1	1.06343	0.936086	0.935863	1.00076	0.925604	0.941884	0.965969	1.00767	0.929841	0.912669	1.46173	0.969092	0.964854	0.918691	1.8598	0.897728	0.951474	0.918914	0.936309	0.919806	0.916015	0.942553	1.04179	0.929618	0.935417	1.03064	1.56677	0.897728	0.926496	0.897728	0.897728	1.00767	0.920698	0.921367	0.914231	0.897728	0.982249	1.10558	0.996299	0.897728	0.920252	0.909993	0.936532	0.964408	1.08974	0.92159	0.92828	0.975782	1.12119
LYPLA2	52.4385	35.5539	37.4902	20.0542	27	25.443	26.5919	49.2164	36.4453	46.257	45.0862	46.8828	41.0335	26.2369	23.5724	54.3877	54.41	51.2975	7.00449	7.85112	12.5311	95.7448	46.6655	20.0315	13.012	35.273	47.8962	19.6628	16.0143	8.09989	31.0687	52.4495	12.9865	42.5749	45.1512	77.4323	24.9694	44.7173	40.8748	49.4845	18.1443	28.821	23.4787	24.5056	52.9663	26.8822	58.0324	31.7542	8.04848
CLCN6	4.04307	8.01265	8.6386	4.68921	7.27638	5.66333	3.5772	4.73079	7.65299	5.36735	5.94308	10.0506	6.2035	4.83693	4.36456	4.41105	5.08412	4.93094	3.13319	3.18752	2.97153	5.07287	5.59213	2.6784	5.7998	6.81154	6.16065	3.52144	8.18437	3.231	5.11311	5.27183	4.04078	3.91508	4.31616	6.0138	4.72168	5.25813	9.07461	5.53067	7.22126	10.1328	4.50728	10.2857	4.42444	7.79199	4.21035	4.39521	6.99814
MRC2	22.4936	12.1778	3.14613	3.40306	2.25856	1.84194	1.94332	14.0525	1.90378	2.07548	6.50261	8.38843	1.97933	3.56306	1.57047	1.60439	3.69091	3.51398	1.67839	2.74389	1.68124	4.14308	7.68872	13.1487	2.19379	3.44683	5.33273	5.90405	1.79863	1.86571	2.5408	10.1964	1.74063	2.15702	2.97958	1.7487	2.29041	5.57181	1.78217	2.2221	2.04525	1.51847	3.06228	3.02105	6.98378	2.38134	11.151	1.88878	8.22343
SLC6A7	0.964546	0.968416	0.972286	0.973495	0.964546	0.964546	0.974947	0.969303	0.964546	0.964546	0.977123	0.981961	0.964546	0.989943	0.978816	0.964546	0.980913	0.990265	0.970432	0.964546	0.970109	0.964546	0.964546	0.964546	0.964546	0.97801	0.989136	0.964546	0.9689	0.967932	0.977285	0.964546	0.964546	0.964546	0.969545	0.990668	0.985105	0.999698	0.967852	0.967529	0.964546	0.972044	0.964546	1.02034	0.98962	0.986395	0.964546	0.964546	0.968335
TSPAN9	11.0411	14.6043	8.57325	11.0851	7.94126	9.79437	2.60916	8.8602	9.93383	8.54837	8.7499	11.6277	12.1297	11.2926	5.89304	12.4418	12.6636	8.03295	6.07819	6.33942	5.82821	10.3886	8.13046	6.68669	10.0493	10.4428	9.14837	9.21718	6.31164	8.11317	10.9814	7.66181	13.9934	8.91546	8.43081	11.2141	5.64283	12.6045	12.3736	12.8126	8.6367	12.2076	5.90575	7.33391	6.76897	9.44443	7.57524	12.7317	11.4487
BTBD7	3.34796	5.21546	3.69746	4.94503	3.97513	3.65526	3.15573	4.16449	3.30504	2.86994	3.54855	3.0902	3.58988	2.98341	4.09466	3.05174	4.73417	4.05596	3.78513	3.90912	3.62189	3.17898	3.95634	3.01582	4.92194	4.63168	3.9952	3.27072	4.42727	3.95172	2.97728	4.02904	3.53422	2.93922	3.13336	2.36803	3.78561	3.76092	3.79907	3.05325	4.5284	4.26411	2.82256	5.01327	2.69754	3.37448	4.17811	3.43985	4.74922
APBA3	3.12607	4.17031	3.71875	3.46555	2.85702	3.14902	3.38894	3.78651	4.30984	3.23055	4.62028	3.54066	3.17597	5.22005	2.75805	3.24048	3.42249	3.59098	2.98161	3.55551	3.05413	3.65307	4.1083	3.83525	2.45887	2.83424	4.38686	3.55418	3.11614	3.63004	4.67978	3.9706	3.15027	3.39654	3.55952	3.1617	3.8617	3.17305	4.56779	3.41014	2.84442	2.89174	2.8289	2.69662	5.13042	2.66458	3.71699	3.47607	2.97836
MKS1	1.72896	2.03567	2.09183	1.52198	2.28	1.98118	1.92595	1.70849	1.94957	2.3879	2.95824	2.81233	2.74827	1.68661	2.42533	1.78602	1.99042	1.66274	1.67996	1.81231	2.27576	1.62971	1.68145	1.7045	2.16137	2.27983	1.60667	1.62971	2.08908	1.85266	1.59485	1.80615	1.82221	2.46526	1.56266	2.01421	1.88377	1.76198	2.66616	1.69784	1.64036	2.66067	1.67039	2.7882	2.34505	2.18591	1.97536	2.34888	2.60768
ABHD5	1.64735	2.0187	1.84761	1.99898	1.98475	2.5064	1.8607	1.90544	1.76662	1.4401	2.61109	1.56795	1.65885	1.63029	2.44044	1.42304	1.89925	2.33028	1.92011	1.66742	1.85345	1.60615	1.69191	1.41765	1.82639	2.02922	2.26352	1.67945	2.14664	1.6233	1.34576	1.89023	1.92038	1.73559	1.4737	1.25717	1.92542	1.6462	1.8821	1.9347	2.10888	2.12975	1.3707	2.58447	1.46079	1.55257	2.00031	2.3599	2.15946
AKAP8L	3.93658	7.50052	6.37999	4.95373	5.26882	4.823	5.73495	4.39619	6.73049	4.91956	5.48353	5.32951	5.58391	7.42772	3.26494	5.31978	5.11779	4.19757	3.76149	3.36034	4.07834	4.70354	5.00975	3.84746	4.85925	5.51127	4.15014	3.98401	4.65044	3.54011	5.04944	5.78483	4.63872	5.3607	4.06654	8.75736	4.32945	3.87995	7.65821	4.40837	3.93658	7.09646	3.91459	4.76546	5.14653	4.12225	4.81779	5.04798	6.67654
MBTD1	3.13107	4.44008	3.00076	3.84498	4.22244	3.90486	2.85069	3.4377	2.65923	2.83618	2.83213	2.94429	3.23077	3.05176	4.61418	2.42216	4.19254	3.60149	4.01971	4.05096	4.10918	2.62536	3.69611	2.7663	4.80501	4.14654	3.4538	2.91462	5.38567	3.5861	2.5819	3.77185	3.23775	2.53605	2.79573	2.5029	2.89456	3.223	3.57777	2.51749	3.42231	5.57079	2.695	5.65724	2.44627	3.63956	3.56342	3.02566	6.3955
UTP18	13.9092	14.2761	7.31464	11.9603	10.4084	12.9947	6.75684	13.9408	5.27078	11.676	7.63121	10.5054	9.69958	6.96632	14.2516	6.45412	12.9386	15.1247	13.8871	12.7708	8.96953	7.61804	14.2554	6.88175	13.0782	13.9165	9.25436	14.6501	15.238	11.7577	6.89834	14.1321	9.75674	8.20005	7.38687	2.09344	15.6854	12.7051	10.5201	12.095	15.2421	13.6841	3.09143	19.4676	3.68577	12.4586	15.8085	14.3889	14.6184
RNF216	11.662	8.73347	6.43944	7.84764	6.45792	5.78429	6.08059	8.2331	5.93263	6.21927	7.0246	7.48986	9.64421	9.62612	10.283	9.9872	7.11491	7.57319	7.91219	7.428	6.29386	6.69404	7.52674	6.93989	7.8872	8.86311	9.60711	9.30828	6.17527	8.46431	7.66381	7.49347	10.3957	6.12973	6.15625	3.96495	11.118	8.24559	8.40773	6.89757	6.7372	6.48329	3.44894	8.58329	6.40103	8.27465	6.95645	7.1803	9.91422
TTC19	7.15258	6.43625	5.54514	10.034	7.83046	7.01789	3.96321	8.80927	4.00694	4.33681	5.58988	6.26667	6.24969	4.93504	9.28607	4.86246	10.949	11.2784	10.7822	10.582	6.65663	6.30955	8.81989	6.38306	12.2932	8.07774	7.98383	8.76166	9.15037	8.85874	4.88813	10.1352	7.36047	5.43333	6.34925	3.76788	7.52541	8.46777	5.93867	5.95751	6.17486	9.46232	3.17624	8.18862	4.56028	6.38694	9.89989	7.25905	7.55123
PTBP1	29.8928	31.8187	25.6133	27.955	17.8271	14.4205	23.8941	32.5456	26.5317	42.3552	25.6388	34.4639	36.8907	31.5486	24.9016	30.0072	34.4567	28.6011	19.2479	24.3246	19.7325	38.2283	31.891	33.4538	26.8951	29.589	18.2194	34.3652	13.8485	26.2473	40.0136	27.4029	37.3741	27.8276	25.7794	37.2329	24.6043	26.1784	19.7086	32.468	17.1438	15.7832	8.43187	20.3366	35.8224	29.7859	31.1916	23.6898	25.8074
DPF1	1.32752	1.3424	1.47252	1.35534	1.38214	1.39304	1.38518	1.36607	1.50059	1.3862	1.5799	1.32388	1.30858	1.31239	1.33902	1.37258	1.42103	1.34299	1.30841	1.32185	1.35838	1.30156	1.35551	1.30418	1.36954	1.33876	1.35737	1.35982	1.39837	1.42306	1.36185	1.33538	1.31145	1.32625	1.34823	1.27721	1.54718	1.33454	1.64179	1.27873	1.50313	1.40209	1.40818	1.33944	1.33699	1.46297	1.47556	1.31281	1.31898
SYT7	1.58497	1.80496	3.6583	1.49962	1.49908	2.87141	2.33311	2.30291	2.81169	1.55301	2.23021	1.52197	2.28346	2.2997	1.36506	2.20481	2.31992	2.08147	2.28689	1.74127	1.09008	2.64197	1.55339	1.35469	2.37293	1.99733	1.11037	2.51412	1.74928	1.14675	1.76446	1.38489	1.69733	2.25172	1.76087	3.74572	1.10846	1.16536	2.62267	2.40825	2.58468	1.78208	2.2682	1.18398	1.27551	1.15781	3.33648	1.5894	1.3836
LARS2	2.98778	2.7173	3.41356	2.5426	3.44852	3.52057	2.73185	3.23533	3.10903	2.56826	3.95231	3.82106	3.29737	2.63929	3.14449	3.03244	2.86219	2.52734	2.80904	2.11055	2.61696	2.54735	2.34143	2.25312	2.9703	3.67779	2.46197	2.31192	4.10478	2.47348	2.42276	2.68284	3.19451	3.35809	2.19189	2.6793	2.62404	2.26302	3.98899	3.45186	3.68455	3.71517	1.94464	3.20401	2.30333	3.01314	3.38315	3.22957	3.4754
PIK3C2A	6.71845	35.6997	2.58116	24.1375	4.38778	3.74531	1.88495	12.812	1.75387	1.78588	2.5272	1.7669	2.70378	3.01778	4.35562	1.66592	25.2354	16.9698	5.5511	5.72669	3.38505	3.60569	12.9831	7.86332	5.82112	3.89461	7.62798	7.59498	6.66716	5.52191	3.58755	22.1859	3.39153	1.85843	4.35943	1.31076	3.24291	7.9438	2.31975	2.3984	4.36233	6.7465	1.5612	6.93795	1.75653	3.21845	18.3706	2.93235	7.93184
PLAUR	1.31983	2.17959	1.41386	1.60235	1.5381	1.56122	1.39457	1.59527	1.55593	1.51583	2.84182	1.54296	1.45072	1.77292	1.77147	1.43058	1.60004	1.7573	1.47657	1.40558	1.74049	1.52666	2.30144	1.5282	1.40191	1.50763	2.62714	1.41036	1.34662	1.40652	1.55798	2.557	1.50362	1.33442	1.68179	1.73742	1.65798	1.95791	2.13991	1.70082	1.39423	1.52854	1.61941	2.10851	1.86166	1.80227	1.9719	1.56267	1.47973
ANLN	1.99425	2.09364	1.18467	3.07977	1.90617	1.7902	1.42571	2.64167	1.28597	1.29144	2.5995	1.49414	1.49395	1.14671	1.64835	1.13675	3.19459	2.648	1.53766	2.97214	1.21879	1.80995	1.97643	1.65382	1.89486	1.80362	1.42964	2.31878	2.43235	2.56308	1.6082	2.34149	1.66772	1.53459	2.20185	1.17738	2.31082	1.98783	1.27371	1.26412	1.10061	1.50564	1.07378	1.60954	1.16818	2.31705	3.43142	1.50804	1.60427
WIZ	4.70219	5.36469	7.77198	5.42675	7.19199	6.55383	7.14375	4.20029	9.51401	10.6466	8.32991	6.95154	9.21219	12.2654	7.79206	6.52277	5.10737	5.02523	4.67768	4.97982	5.25935	5.70591	4.9402	6.25621	4.89936	8.21747	4.2038	6.55116	5.95507	6.69093	8.4967	3.94197	9.0512	6.40269	4.82921	10.7593	3.80228	6.31796	8.22846	7.02238	7.19405	6.41933	5.57843	5.76889	6.93955	6.25201	4.06464	6.12743	8.60815
RABGAP1	4.62564	10.0008	7.20725	7.25922	7.11062	6.76383	4.24992	6.21395	4.35776	4.06901	5.95636	5.93441	6.18993	4.80748	6.20965	3.69152	6.54032	6.67871	7.07592	6.27198	6.17634	4.87088	6.34797	4.65703	8.04297	7.87825	7.16074	5.34239	8.64942	13.6046	4.1311	7.53991	7.64192	4.90127	4.77601	3.65867	4.05918	5.7634	6.21771	5.0349	7.04591	8.85805	3.77733	9.78725	3.34965	5.62823	5.43872	6.34045	13.7735
DCN	1.24297	1.15244	1.54115	1.20585	1.52826	1.16008	1.23385	1.5825	1.04193	1.12233	3.8099	2.03319	1.2658	1.76429	1.33975	1.04672	1.05694	2.07077	1.09396	1.01992	1.06053	1.04709	1.09415	1.03806	1.63463	1.89368	3.52184	1.02149	1.1785	1.04294	1.02738	1.13964	1.06652	1.07601	1.08825	1.12196	1.35578	1.56851	1.16202	1.14047	1.14203	1.05142	1.50063	1.41425	1.80472	1.04359	1.05584	1.2274	3.35294
QPCTL	6.33892	6.14929	8.85086	4.72482	6.04669	5.32143	3.6877	6.39316	6.64001	9.4878	8.62006	10.5055	6.15563	6.2163	6.19865	3.79145	9.7549	9.03254	3.2047	5.40417	5.2901	7.51998	5.30928	7.86087	2.84967	4.9758	6.65896	6.70747	4.4698	3.16971	8.15937	6.85882	4.54727	4.51633	5.54864	6.18222	4.34367	5.60525	6.14242	8.28886	3.39402	4.03555	4.21967	5.48171	6.86485	3.36598	7.71892	5.07718	3.88978
PPP5C	7.12295	11.2449	4.45223	11.3422	5.79235	4.37844	4.60081	12.2749	5.72327	6.11933	4.81984	7.30523	7.71354	6.15219	6.01533	5.72973	11.3333	10.227	5.84355	7.8056	3.96526	9.77769	11.0458	9.95686	7.71773	7.83816	8.36743	9.91699	4.52549	9.18756	10.0001	12.9207	7.01089	5.75065	6.7698	5.44292	7.41425	8.85418	5.27037	6.29651	5.25668	6.19297	1.49706	4.1076	6.06836	3.2397	14.1549	6.31957	9.3779
CEP68	4.52719	4.55716	4.01877	4.39184	4.2143	4.51283	3.37942	4.57546	4.11973	3.98541	3.76188	5.11764	4.62073	3.57455	6.24175	3.79516	4.51733	4.61103	5.13049	4.41203	4.32448	3.53606	4.31384	3.55129	4.99262	5.97515	3.99014	4.68225	5.55823	4.7956	3.82261	4.04125	5.14856	3.80636	3.65485	3.69949	4.64582	4.35864	4.43775	4.55006	4.45557	5.09011	2.68375	8.45392	4.21122	5.96916	5.76164	5.05722	7.3194
MAP4K3	4.11753	13.0638	3.65961	7.21469	5.15109	4.72256	3.68422	8.44425	3.17747	3.13319	3.68179	3.68069	4.20006	3.62466	6.85426	3.03711	14.1568	7.96243	6.28489	5.59812	5.45415	4.08266	6.24367	4.00875	6.53239	6.03371	10.5838	4.88212	6.0881	6.81335	3.30349	10.4258	4.91057	3.28194	3.77623	2.92457	4.38674	5.39232	4.07333	3.34401	5.63558	6.69579	3.53907	8.04142	3.24048	4.09723	14.7693	4.63173	7.33287
ZBTB32	0.896669	1.00694	0.886783	0.935758	0.963592	0.909293	0.900319	0.954086	0.884045	0.916442	0.869672	0.920853	0.953858	0.944504	0.990665	0.889596	0.89857	0.912259	0.891346	0.879558	1.00991	0.896517	0.97576	0.891117	0.875299	0.942526	2.40076	0.869672	1.06998	0.939332	0.900852	0.995608	0.993783	0.869672	0.899331	0.888912	0.907544	0.931804	0.943287	0.883056	0.92032	1.02382	0.887087	1.03394	0.881992	0.891117	0.906099	0.889673	1.1036
TYROBP	8.73072	22.8801	13.1601	11.7235	8.13288	9.64236	5.05959	38.4676	14.5714	3.59615	47.4318	19.2083	0.506957	58.0209	8.14384	3.15391	10.15	65.761	1.78619	-1.22029	22.1602	20.295	39.5904	3.95484	2.3335	10.5214	110.093	1.77675	-0.279056	-0.71239	20.8995	75.458	-0.359407	0.801959	17.4962	4.08975	55.983	45.9965	28.7897	25.8256	2.23816	0.930475	64.8156	67.8305	42.8759	38.4619	14.709	7.75623	4.8368
TMEM159	6.65011	8.55653	6.83593	8.0889	8.35371	9.13269	4.09801	7.17957	10.2885	2.93364	8.86905	4.62941	6.93113	3.91575	11.881	3.77928	5.34942	4.65043	11.5919	9.34707	9.78963	4.23301	6.88854	11.5527	5.11891	7.45524	8.78634	7.07009	5.89045	17.4309	4.69008	9.85372	7.4914	3.62604	3.9921	4.04719	5.10332	6.93688	11.0961	6.26923	19.5215	8.15346	4.52133	3.5957	4.77465	4.56974	7.99844	7.22698	5.16508
GABRA3	0.975667	1.04018	0.975667	1.03261	0.975667	0.975667	0.975667	1.36312	0.980406	0.984534	1.18847	0.975667	0.975667	0.975667	0.975667	0.975667	0.998063	0.985069	1.04469	0.978954	0.975667	0.975667	0.975667	0.994623	0.975667	0.975667	0.979107	0.975667	0.975667	0.982241	0.979795	0.975667	0.975667	0.975667	0.980559	0.975667	0.975667	1.01694	0.998445	0.978648	0.97903	0.979336	1.10278	0.975667	0.975667	1.30985	0.981706	0.995541	0.990419
BRCA1	1.75388	2.03001	1.82984	2.00331	2.00073	2.18081	1.42883	3.01661	1.52555	1.55371	1.80953	1.72033	2.10799	1.74288	3.07103	1.54271	2.25251	2.21481	2.45773	1.83668	2.13986	1.49379	1.9481	1.46148	1.93363	2.34732	2.13705	2.30951	2.57835	2.26216	1.48022	2.10014	2.21324	2.02945	1.83713	1.55651	1.92993	1.80998	2.01542	1.9223	1.64504	2.0952	1.40437	2.32533	1.4847	1.89784	2.40903	2.53089	2.21683
ERCC1	12.3682	6.5529	12.7512	9.29697	9.92897	12.3213	13.3347	8.51226	16.0919	14.1793	13.0937	11.6413	12.3073	16.521	10.2751	15.8753	7.69288	11.6094	8.26383	13.3561	11.1177	12.994	9.95996	12.4947	8.20247	8.51464	8.51195	13.3063	10.2247	10.4848	17.4321	9.38103	8.05989	15.3894	17.1569	19.1997	16.2826	15.9769	16.199	14.2451	13.9737	9.0332	11.4004	7.72816	18.5704	10.4643	8.72847	8.36055	8.27511
CD22	1.12528	1.21219	1.14314	1.51818	1.14169	1.30308	1.11559	1.21334	1.30987	4.23836	1.54169	1.26653	4.1532	1.24417	1.24096	3.1326	1.9162	1.87889	2.22852	1.12574	1.69483	1.38495	1.28049	1.12666	1.35741	2.17175	4.54893	1.11788	1.1217	1.19258	1.29979	1.42471	6.45293	1.36572	1.14627	2.99647	1.29041	1.28873	1.22982	1.70246	1.05073	1.10529	1.70796	1.82616	1.37313	1.58396	2.11757	1.67858	1.10102
SEMA3B	1.07847	1.46335	2.47951	1.61811	2.24604	3.17346	3.60792	1.3854	3.08273	6.52104	7.98247	3.97379	5.46853	3.84048	2.91938	3.91463	0.652294	1.20167	0.819069	1.0822	11.373	1.17558	0.666363	0.962573	8.0538	9.80406	1.29962	0.825761	1.44647	1.23338	1.14243	0.797775	3.88809	5.31096	3.19772	13.3834	1.95934	2.13494	2.76599	4.62142	1.7512	3.92345	4.11387	2.47237	6.10506	4.05661	1.03208	4.24453	5.86208
MBTPS2	3.94221	5.60496	3.30894	4.51921	3.67358	3.77004	2.65339	4.54066	2.654	2.52334	3.52823	2.76907	3.09534	2.66991	4.38224	2.30128	5.62287	5.11697	4.1226	3.23692	2.80611	3.2473	4.44635	2.89204	3.7137	4.49923	4.72843	3.64867	4.84411	3.6177	2.80434	4.56149	3.92937	2.70312	2.66676	2.12957	3.49126	4.4734	3.96673	2.73809	5.60681	4.28401	2.15963	4.69469	2.18668	3.21786	5.32788	3.1091	5.32549
PRICKLE3	2.494	2.80158	3.02699	3.48169	2.38404	2.22441	3.13023	3.35556	4.07077	5.61519	4.10869	3.96616	3.87451	2.8579	3.31794	3.58081	2.85813	3.21775	3.01913	2.64439	2.69376	2.75572	3.41454	2.92779	1.51584	2.91673	3.52244	4.02232	2.36069	2.00511	4.23261	2.75694	4.20629	3.33336	2.55763	4.34341	3.15663	2.72139	3.99019	3.88588	3.34236	2.33185	1.92254	2.14429	4.432	2.61471	3.4852	3.0785	2.49522
LTF	0.990765	0.963184	1.04686	1.10466	0.923903	1.02602	0.936532	1.41231	1.06096	0.924523	25.18	1.0629	0.915148	0.947843	0.977749	0.970854	1.23203	1.14347	0.94242	0.92553	0.972868	0.994949	0.960317	0.975037	0.970234	0.975347	1.18291	0.924833	0.937771	0.942962	0.936997	1.51644	0.947688	0.967135	0.977362	0.921889	1.04229	1.15432	1.06615	1.06762	0.943505	0.94978	1.00657	0.930798	1.0615	0.98263	0.959697	0.943117	1.03206
EXTL3	2.66051	3.91411	9.18404	5.46213	8.54879	6.30978	3.72047	2.91426	9.34255	5.6337	7.30387	13.7161	6.55369	9.46723	8.33193	6.41417	3.1494	3.13995	7.12499	4.36027	5.53669	3.41399	2.78573	2.32389	3.79358	11.1065	3.11489	2.37862	4.93088	4.14403	5.655	2.66981	9.15791	5.32153	3.82548	6.69636	4.73901	7.48428	8.31571	8.23285	11.6848	6.62395	3.77305	8.75441	7.9359	11.1886	2.86475	6.67691	9.33025
NR1H4	1.11072	1.11568	1.11072	1.11647	1.13781	1.11647	1.13058	1.11072	1.11072	1.11072	1.13737	1.12736	1.11072	1.18354	1.1244	1.11647	1.11908	1.11481	1.12196	1.11499	1.12501	1.11072	1.11072	1.11072	1.11072	1.12213	1.11072	1.11072	1.12187	1.11072	1.11072	1.11072	1.11516	1.11987	1.11072	1.11899	1.11072	1.12413	1.11072	1.11455	1.11952	1.12021	1.11072	1.12361	1.11072	1.11072	1.11072	1.1237	1.24077
ELOVL5	10.6576	21.7869	11.4362	18.0291	15.1194	15.7498	3.61672	23.6212	9.22353	9.50091	11.9952	11.6907	5.41252	11.2767	43.6662	2.42178	23.8443	22.9171	11.7524	7.85936	7.6413	10.4571	12.6794	5.86536	13.5364	20.6185	28.7397	9.15766	9.75236	8.07704	4.99336	19.8952	9.06525	4.17651	3.91646	1.33454	8.71569	9.30879	10.1259	5.65666	19.5032	10.5753	1.77773	32.6979	3.5723	18.6513	25.4706	9.43307	19.4312
ALOX5	1.17098	1.35655	1.27565	1.35877	1.16047	1.26052	1.1839	1.48499	1.23367	1.15841	3.07359	1.1845	1.12027	1.45087	1.10847	1.1136	1.1573	2.4944	1.3338	1.10377	1.09402	1.0481	1.53262	1.07897	1.16996	1.38691	2.92232	1.06016	1.0953	1.14918	1.15987	1.77189	1.14123	1.09607	1.27061	1.12113	1.6325	1.55212	1.5688	1.20596	1.09282	1.19869	1.33526	2.39469	1.47311	1.43309	1.16508	1.1992	1.48585
KDM5D	1.08943	1.01001	1.00593	1.00825	6.16194	1.00593	1.01131	1.401	1.10493	3.70641	1.00593	4.87762	1.00806	1.00593	1.10808	3.29324	1.00593	1.00593	5.8281	1.00593	1.12831	6.09356	1.00593	1.01094	8.55048	5.98751	7.02112	1.03525	7.50109	1.00945	1.08749	1.43125	5.99577	3.78732	5.32976	3.75336	6.00699	5.45149	1.09426	1.00908	1.00955	8.29106	1.11671	1.00853	1.00593	1.00973	1.08953	4.81091	1.00788
CALCOCO1	5.20615	8.26885	10.8725	6.36091	9.27236	8.46485	7.84789	5.67408	11.7791	7.391	9.51402	19.2513	8.71134	8.74643	8.83132	7.07065	5.03061	5.47869	7.96053	4.25666	4.69187	6.59192	8.27306	3.36564	7.99547	11.023	6.51499	4.58085	10.7867	6.42964	5.61477	6.67391	10.8243	8.41895	4.8291	17.7727	4.67134	5.68887	11.0254	10.4827	9.89643	11.6717	3.18236	6.58594	10.3785	11.6005	4.85147	10.5202	12.1622
UBR7	6.81019	11.6649	6.87631	10.9929	8.88088	9.17706	6.87623	10.2782	7.29186	5.08863	6.76782	6.4066	6.99743	5.5398	8.32176	7.8401	10.77	11.8088	15.4189	11.1141	6.81663	7.12813	10.5798	9.78828	13.3314	9.1658	10.0643	9.06023	10.0307	13.0577	6.94373	11.0131	7.98505	6.23958	7.32534	4.6314	11.3831	8.92424	10.2712	6.4793	10.1696	9.93767	4.44891	8.58661	6.02438	6.36929	12.2158	8.23955	8.45085
MAP4K5	3.45294	5.27711	3.74224	5.43967	5.41207	3.81491	2.8832	4.27514	2.90011	3.79329	3.95409	2.99766	4.09176	3.54491	13.6583	2.63235	4.90016	5.0182	4.23605	4.22967	5.21825	3.38004	4.6619	3.02861	5.9472	7.74704	4.84384	3.81626	5.77467	4.53676	3.08899	5.29003	3.9095	2.9498	3.25856	2.61791	3.59109	5.00632	3.62906	3.47352	3.68162	5.70153	2.89668	7.44865	2.7082	6.45433	4.76639	3.53334	8.68664
EHD3	3.77848	5.17449	1.31625	4.02907	2.27638	5.7704	0.945737	4.18779	2.32477	1.76013	3.42717	1.30841	2.04153	3.66302	5.75573	1.27315	13.8532	3.61954	2.9349	1.96041	6.21398	3.3495	3.61984	7.11349	1.49809	5.65079	5.32107	3.79354	9.25967	1.87022	4.71725	4.44107	2.09369	1.05229	3.02393	3.4274	6.06778	8.66122	5.59341	4.5013	4.00741	1.62969	1.89142	4.67392	3.26515	11.3457	16.246	1.81744	5.18571
PSMC4	22.1815	25.5	16.9565	30.0446	17.5266	12.9237	22.0337	37.4945	20.4848	27.2565	25.1796	29.5748	17.849	25.9462	18.4014	25.1285	32.9208	49.2393	17.4198	22.2152	18.5555	39.2033	31.2369	27.2819	23.175	15.5039	34.6207	38.1418	11.9346	25.1297	29.8642	45.3306	19.991	28.7734	31.863	19.4507	53.6295	25.2135	23.9679	28.2816	14.6387	16.4981	14.0863	20.1505	24.9127	18.499	44.4005	23.4228	17.3808
MAN2B2	6.93582	8.61957	8.72469	9.30024	8.39564	7.6209	6.92909	6.48131	8.07246	6.77527	11.9633	17.0404	6.27277	8.8149	7.28319	6.57098	10.435	12.7599	10.7607	5.20213	4.68687	8.06574	7.5715	9.07299	12.907	7.13424	12.3295	10.0831	7.66271	5.94086	9.42956	6.48641	9.16923	6.71544	6.20938	8.51591	8.27599	9.64383	13.0896	8.58424	13.4651	8.81003	4.93832	7.61139	6.10264	8.09272	10.2642	10.2808	9.27365
SLC7A14	0.991448	1.00651	0.99315	0.991448	0.991448	0.991448	0.991448	1.06959	0.991448	0.991448	1.02388	0.993321	0.991448	0.991448	0.99298	0.993406	0.992895	0.99281	0.995278	0.992895	0.991448	0.991448	0.991448	0.991448	0.991448	0.991448	0.991448	0.995449	0.995193	0.991448	0.991448	0.991448	0.991448	0.991448	0.993576	0.991448	0.991448	0.99298	0.994342	0.991448	0.994427	0.991448	1.00166	0.991448	0.991448	1.04159	0.991448	0.997321	0.99962
CLDN11	1.13707	1.16056	1.14348	1.20478	1.13876	1.20959	1.14232	1.20656	1.1449	1.10192	2.17674	1.18236	1.11927	1.13858	1.11251	1.10681	1.15771	1.15656	1.35089	1.09694	1.12755	1.12185	1.11749	1.09694	1.13449	1.13128	1.15834	1.1021	1.42288	1.13013	1.10619	1.17409	1.11998	1.12844	1.20683	1.14677	1.1643	1.27366	1.15513	1.14641	1.11945	1.11731	1.12274	1.10797	1.15166	1.14463	1.13066	1.1118	1.16305
SLC25A39	28.7343	18.3083	26.9655	22.4695	25.8128	28.6587	33.9963	26.6548	37.6015	36.017	20.138	40.1779	28.1246	27.1706	25.2268	36.5007	30.6999	38.1484	38.7995	36.5087	32.1768	37.7275	24.2481	41.4134	22.8276	13.686	23.597	33.6522	17.9808	26.6161	47.5597	21.1079	20.947	38.4743	41.7557	44.5815	42.3926	32.002	29.7011	34.7609	23.0593	20.8988	21.9589	24.1228	50.3227	43.2088	33.9535	24.9115	19.6127
MVP	15.7029	34.8749	26.6566	28.2455	10.9794	12.2382	17.648	36.7747	25.3024	24.9259	40.1247	25.9565	11.1184	15.1119	15.6894	22.2231	25.0013	37.1275	27.1128	17.6655	9.07623	56.4666	47.2069	29.5281	23.2246	7.48956	91.4421	26.0012	3.65617	29.4393	49.9521	51.0451	20.2929	20.7455	32.2678	40.4239	42.7517	35.1399	34.052	43.8865	13.4291	10.5658	10.725	8.74762	22.4366	29.5072	26.0221	23.0173	7.0545
NUB1	7.22632	6.28154	7.6128	7.08327	6.6458	7.52746	5.32179	9.0733	7.48968	3.8458	7.87157	5.83468	6.10735	6.23956	8.06508	2.10173	5.83659	6.63748	8.12538	4.47151	4.82501	5.0147	11.0498	4.37976	7.55754	7.74471	11.7007	5.58438	8.225	5.55629	3.96801	11.4042	7.18732	5.37889	4.53662	4.32434	6.83694	5.57698	10.5831	7.55708	8.4098	7.66471	3.01208	7.13045	4.84532	6.76191	5.96407	7.17022	8.35324
PGM3	1.95761	2.57429	3.04566	3.97572	3.14767	3.20446	2.05679	2.38219	2.47475	1.69826	2.83052	1.93156	2.06541	2.84988	2.59007	1.80808	3.21538	4.48057	3.58536	3.59298	2.25953	1.83854	3.50151	1.88752	3.81618	2.50962	3.83967	1.96284	4.02636	3.37115	1.98321	2.80997	2.58934	2.20128	2.54503	1.8045	2.7131	2.49044	2.9652	2.36733	2.96401	3.80215	2.15009	3.60949	1.72597	2.6064	2.94951	2.75612	4.35653
RWDD2A	1.6715	2.27162	2.15751	2.87285	2.64328	2.21551	1.69537	1.88564	1.78876	1.37779	1.76189	1.89741	1.65487	2.25354	1.87779	1.52259	2.30471	3.39444	2.83047	2.22352	1.96179	1.51518	2.59254	1.69742	2.90509	1.87822	3.40936	1.60327	2.6889	2.30377	1.60046	2.10131	1.82432	1.60685	2.0359	1.33421	2.4618	1.98994	2.78433	1.6332	2.51706	3.34855	1.54971	3.01016	1.60012	2.00392	2.33686	2.10856	2.88829
CLK1	4.47976	19.4435	5.98794	13.9327	9.19786	13.0456	4.09309	8.56365	3.87567	2.73735	3.58249	4.35508	4.58893	4.80987	9.7223	2.26788	13.8493	10.7953	13.6102	18.0996	15.9708	2.92503	11.8608	4.63687	8.02247	7.81414	11.2785	3.84891	19.9104	12.7234	2.75394	15.3467	4.63901	2.56297	7.93768	1.96079	3.61261	5.80867	6.37454	3.70909	8.43445	11.4873	6.47285	33.3302	3.35406	4.43038	9.36498	5.78994	14.6424
POLR3B	4.40544	4.68468	4.06508	4.27941	3.94807	4.06284	3.16808	4.93653	3.35493	3.04922	4.05111	2.73293	3.22558	3.21408	3.69268	2.77106	5.18806	4.58975	3.06743	3.35262	2.88505	3.76337	4.24745	3.2086	5.41598	4.08892	3.65571	3.82381	4.08638	3.0946	2.94533	4.47174	3.52573	2.74667	2.96301	1.93279	2.77083	3.93981	4.15638	4.17784	5.48173	4.00943	2.47561	2.57	2.59532	3.13404	5.05508	3.36589	4.59137
ANGEL1	3.91152	7.96967	6.10468	3.84201	4.48604	5.12243	3.04142	3.43131	5.74846	4.68149	5.12687	7.04781	3.40053	3.73306	3.84053	3.50659	7.26867	3.91908	2.60539	3.07859	4.95449	4.12747	4.15046	4.04424	7.13214	3.88588	3.73314	4.21608	6.5517	2.27005	5.29567	3.85915	3.56145	2.2204	3.23679	3.80039	6.58942	4.81156	6.01826	4.93204	5.02813	5.08487	2.29686	6.69899	8.29792	5.33682	5.12375	2.5033	5.57552
RNF14	8.2921	12.8631	7.03498	15.6222	10.4189	9.47607	7.58463	13.1435	6.70439	4.86886	9.80039	9.37874	9.60444	6.57777	12.4744	5.32058	13.4654	14.347	12.9662	10.9898	7.60904	7.68867	12.0128	7.10568	19.9709	11.3065	12.3263	9.88613	11.0246	11.3973	5.47107	12.2696	12.6011	7.95915	5.95665	1.15341	8.91185	8.42451	8.50773	9.95119	9.58918	14.2503	3.67879	10.2892	4.44171	4.01037	12.5948	12.8971	6.53811
DNASE1L1	4.43682	4.97316	4.1376	5.39255	3.70261	4.34171	3.76101	5.04922	4.31534	3.87321	4.35271	4.36553	4.21908	3.6231	3.81768	4.57932	5.19148	4.43682	5.40708	4.60101	3.92758	5.43098	5.15411	4.66893	4.01908	4.90655	5.64388	4.93637	4.30228	4.77218	3.75066	5.21587	4.95099	4.80372	3.86787	4.07074	4.42343	4.90343	4.63592	5.02704	4.44963	4.27772	2.97079	3.4475	3.89826	3.51608	5.14573	8.90884	4.42483
DDX11	1.76311	2.96502	4.33532	3.41712	2.22835	2.46275	3.23837	2.86795	1.99975	4.2	3.46218	6.23626	4.73001	2.90713	3.63259	2.06196	2.22905	2.86493	3.83584	3.70941	3.45399	1.78459	2.03182	2.26552	4.03817	3.92657	2.35463	3.38095	8.38682	4.25997	3.70446	2.91818	7.86554	7.0271	4.06352	5.87643	1.50506	2.65094	4.23362	7.18398	1.59656	5.73925	2.46978	2.14319	3.73731	4.96163	3.24463	5.82032	9.79585
HEBP1	17.8107	9.34228	19.0155	12.6545	22.827	11.6031	6.56926	15.5816	23.9343	16.3459	15.5145	17.8911	17.4324	25.6398	13.7155	9.68956	9.61086	19.4169	12.3002	28.1722	30.5669	14.8747	16.7216	10.7822	21.7202	15.8608	50.5649	36.5954	10.8383	16.183	13.075	12.0265	15.7095	12.7155	20.4698	5.746	18.2678	24.7645	36.935	12.9677	34.3717	18.4472	25.7639	29.2768	20.2032	12.8895	11.6566	15.4409	16.0383
GPRC5A	1.0972	1.60138	1.29098	2.31841	1.24139	1.08046	1.18276	1.5595	1.87644	1.20869	1.51543	1.06629	1.20978	1.72992	1.22216	1.02745	1.42395	3.11563	3.43086	2.49623	1.1366	2.63357	2.82236	1.20705	1.43096	1.3085	4.64242	1.46366	1.07642	1.43773	1.36829	1.26716	1.9054	1.21048	1.96293	2.82835	1.724	1.9012	1.84997	1.15707	1.25275	1.03095	1.24302	1.51987	4.25206	1.11838	2.27847	1.27128	1.4491
MAMLD1	2.38255	2.87985	3.85522	4.30272	2.56334	4.17375	3.99119	2.52899	2.15052	2.464	2.55667	3.06208	2.96155	3.79293	4.50386	4.58834	2.64859	4.85844	7.04828	4.50065	1.99302	2.23746	3.48882	3.07584	2.64816	2.58874	3.09238	4.12987	2.72902	13.347	5.89271	2.67053	3.42738	2.34051	2.64031	4.74035	2.27485	5.38351	2.93598	2.05869	3.04258	7.76157	2.2313	2.44593	3.94224	2.17171	2.10638	2.77983	5.49771
CD6	1.13684	1.27191	1.11087	1.31533	1.0513	1.13578	1.15414	1.66941	1.23458	1.15338	1.86229	1.21264	0.978165	1.19025	1.17372	1.14271	1.24845	1.11224	2.06119	1.50372	1.06722	1.37041	2.22589	1.14058	1.1242	1.07217	4.29048	1.42754	0.997896	1.12511	1.26932	1.76509	1.25332	0.982584	1.23976	1.07712	1.7414	1.4542	1.57007	1.28928	1.05587	1.01412	1.1498	1.55156	1.25926	1.53084	1.77301	1.07286	1.04299
TACC3	2.65531	3.26615	2.06276	3.46935	3.28088	2.98886	2.8589	4.08012	2.22116	2.23356	3.6631	4.79365	3.11185	1.8236	3.38449	2.25983	5.41123	3.61133	3.53391	4.20086	2.50171	3.26507	3.22244	3.98743	2.76164	2.62563	4.61168	5.09628	3.44517	3.98154	3.00653	3.95845	3.763	3.02761	3.85491	2.70258	2.35562	2.45839	2.29936	2.67716	1.82135	2.93926	1.6145	2.22426	2.18815	3.64551	7.67218	3.01831	2.40204
UFL1	2.98998	6.22649	3.94417	8.64852	6.19956	4.60962	3.0256	4.77057	2.69061	2.02709	3.11162	2.5395	2.42078	3.35621	4.45943	1.77611	7.16991	10.5003	6.26534	6.31512	2.98413	2.44702	7.73856	2.96097	8.70699	4.34702	6.97372	3.08784	7.8879	5.81717	2.73393	5.22874	5.05009	2.64191	3.08023	2.02793	4.62777	3.93325	3.54324	2.36039	4.62931	8.07794	2.44571	8.33084	2.40509	3.40591	5.69922	3.85492	9.38036
POLA2	2.2693	2.12505	1.75248	2.13452	2.18234	2.09712	1.92563	2.44176	1.93848	2.02195	2.08572	2.07142	2.09838	2.26485	2.05703	1.95935	2.38737	2.57587	1.78959	2.15886	2.20369	2.46466	2.27027	2.11297	2.10253	1.83819	2.40486	2.25481	2.15065	2.37278	2.10128	2.59365	2.20109	1.96997	2.5151	2.16785	2.1378	2.36099	2.34998	2.10022	1.65577	2.08398	2.07452	2.11345	1.92244	2.31056	2.4664	1.99258	1.98418
ZC3H3	12.8504	16.9156	7.70721	19.4502	5.31511	3.19368	9.55554	20.7885	9.75004	32.5127	6.50264	19.6146	24.9959	17.0985	11.9549	16.342	16.2781	17.6581	6.56184	10.7533	17.0618	24.178	18.9462	20.6292	7.44058	11.2	14.8854	26.6261	3.1984	6.52029	26.2128	18.0142	23.3933	16.703	16.2941	23.7519	14.3051	11.8371	10.0921	19.3977	2.44765	4.31387	8.8366	9.344	20.0846	20.7501	20.4167	10.2	6.02089
CAPN1	15.3922	14.1128	18.6963	18.8217	10.6398	7.96116	13.6349	17.1903	20.8031	31.2969	20.1627	30.7674	24.2754	44.0653	14.2491	19.6649	16.9911	15.3794	14.0917	11.0221	8.57842	28.2216	18.545	25.521	13.6313	15.9474	19.4243	22.5225	12.2362	15.8323	36.0649	15.5314	19.8918	17.7556	21.9634	35.6642	30.8024	22.4168	21.2174	38.9028	12.8063	10.8179	9.70183	12.894	35.2384	44.1864	16.6699	17.6662	17.4418
MDH1	25.4347	42.7155	11.6418	39.326	21.8438	17.9918	14.457	49.2544	10.6858	11.5534	18.195	17.0899	14.0415	10.7649	31.6445	15.3013	43.1594	53.3434	33.4979	28.0032	15.6845	22.3318	29.9138	22.0314	29.0763	21.6012	30.7602	29.3978	19.8902	27.2764	16.8573	45.6905	15.4535	13.0456	16.0422	2.52027	25.5767	21.8572	20.5194	18.0474	28.1924	28.3768	7.80608	28.947	6.72367	15.7654	76.946	25.2978	16.1176
SLC30A9	5.95815	16.0109	4.27549	10.8299	6.81255	6.67068	3.65865	7.63604	3.31489	3.51186	4.24994	5.7578	5.32311	4.28248	9.68831	3.81449	19.1247	13.7948	10.7087	8.15843	5.40153	4.45535	8.32072	6.28134	9.38192	8.89168	9.85359	9.0743	9.14275	7.82887	3.70115	8.32195	6.59241	4.05719	3.87925	2.4881	4.88428	7.1778	5.04849	4.49648	7.47728	9.0057	2.57696	7.52309	3.42055	4.64381	17.2377	6.80926	10.9187
MTMR11	0.890925	1.23522	1.22396	1.31208	1.45653	1.24419	0.970007	1.10641	1.60711	0.87399	1.40963	0.929547	0.99177	2.077	0.989011	0.9297	1.12296	0.906021	2.67808	1.11093	1.41009	0.890389	1.08763	0.938129	0.987325	0.97744	0.97675	0.980275	0.981348	1.4753	1.04725	1.01583	1.42948	1.0674	1.02763	1.35676	1.65868	1.44296	2.25102	1.01361	1.48082	1.63822	1.133	1.51615	1.50097	1.23162	1.26825	1.36634	1.58412
COX15	7.67811	7.85924	5.1419	7.99773	8.01844	5.80949	4.81954	8.17152	4.19391	4.30939	5.8892	5.06028	6.96582	4.52453	9.43233	6.30787	9.90739	8.9056	8.24015	9.9401	7.20786	7.33213	8.37688	6.79768	7.21451	9.20909	6.80601	6.48961	7.56791	10.4304	3.68392	7.89073	7.85901	6.4854	6.51567	3.02742	5.01702	7.4107	6.74281	5.83219	5.87705	10.518	3.67123	7.75316	4.11374	6.07408	8.25009	8.03059	7.30164
CCDC88C	1.56897	1.68677	1.84583	1.79085	1.69101	2.14042	1.58466	1.93101	1.62207	1.91478	1.9587	1.77289	1.45446	1.59211	2.07297	1.60599	3.10631	2.16278	2.26364	1.41046	1.45673	1.72936	1.8747	1.39015	1.73972	1.75666	2.99588	1.80348	2.39658	2.46396	1.8525	1.46066	1.54701	1.33493	1.56223	1.36497	1.56238	1.3325	1.48011	1.79689	1.70356	1.9427	1.14905	1.61132	1.91282	1.48505	2.89627	1.18332	2.2205
YAF2	1.38003	1.75649	1.41076	1.89552	1.82612	1.72623	1.38152	1.76348	1.321	1.23416	1.43536	1.32988	1.4778	1.42333	1.65935	1.29059	1.83374	1.76623	2.14992	1.79736	1.85151	1.31165	1.66862	1.2898	1.70642	1.53761	1.65447	1.39488	2.11833	1.54869	1.24823	1.70242	1.86919	1.57399	1.36368	1.32085	1.40455	1.45642	1.59404	1.39142	1.70029	1.99156	1.31645	1.4767	1.27228	1.43284	2.10733	1.82431	2.01058
ZMYND11	5.78959	15.9999	6.81017	14.6082	12.929	10.7183	5.07955	10.7837	4.67299	3.17623	5.62853	4.04794	5.64359	6.49316	6.68723	3.10366	12.2198	12.7031	13.7562	9.41371	5.40144	4.91583	11.908	5.14856	13.3794	10.4135	11.6438	7.55817	13.1549	10.2537	3.68885	10.8603	9.40945	5.00332	5.42632	1.9033	4.78604	9.54792	7.67845	4.66812	15.3276	16.9578	3.09628	15.8884	3.28343	6.58316	9.87071	9.45183	18.2773
WAS	1.78845	2.62908	2.06797	1.9483	2.03878	1.80209	1.75605	5.3795	2.48882	1.76474	4.18975	2.42548	1.43887	3.77881	1.72373	1.55108	1.72686	3.27571	1.54048	1.29739	2.01431	2.35283	5.61329	1.5574	1.34031	2.0352	15.9193	1.50062	1.64255	1.25776	2.57885	5.62297	1.30898	1.27323	2.43889	1.71878	3.58893	2.73717	3.0061	2.55781	1.56808	1.69835	2.75844	4.02182	3.51636	2.385	2.37098	1.64789	1.68691
DPEP1	0.953476	0.967552	0.933161	0.959639	0.933161	0.992661	0.933161	0.947237	0.940389	0.946552	0.957889	0.945944	0.951194	0.94252	0.943661	0.933161	1.0393	0.985281	0.946172	0.948074	0.941454	0.99365	0.937802	1.11897	1.00636	0.9464	1.49765	0.988553	0.939628	0.938106	1.00811	1.00993	0.933161	0.943813	1.01473	0.933161	0.96352	0.943509	0.938106	0.942063	0.933161	0.933161	0.941911	0.940617	0.945487	0.943889	0.978737	0.933161	0.933161
BID	4.89776	4.59112	4.13776	4.47316	4.55994	3.95761	4.21546	4.51671	3.04636	2.70322	4.52603	2.66155	2.76909	5.0794	4.50269	2.52831	4.46548	4.89165	5.71455	7.08385	4.35786	2.49659	4.79038	3.85461	3.53731	3.79697	6.22923	4.85194	4.16909	5.56377	3.50951	5.58085	3.21469	2.70643	4.4401	2.17201	4.30021	4.33961	5.83196	2.27563	3.73219	4.16612	3.13049	2.74935	2.1052	3.13613	4.11231	2.77379	4.23152
MATR3	3.12937	3.70953	3.13509	3.43896	3.28523	3.22782	3.11513	3.18757	3.10112	3.09753	3.10863	3.10538	3.1583	3.11626	3.41115	3.09271	3.45096	3.34455	3.2979	3.68453	3.4985	3.10201	3.31506	3.17737	3.24756	3.24789	3.2775	3.13947	3.48841	3.52956	3.11312	3.36574	3.14563	3.09607	3.19789	3.09147	3.10717	3.16503	3.13442	3.09372	3.14115	3.62151	3.12265	3.44648	3.10246	3.11412	3.29353	3.15348	3.30183
NPC1L1	0.987892	0.987892	0.994118	0.991484	0.987892	0.995076	1.02133	0.999385	0.987892	0.991564	0.987892	0.987892	1.00098	0.993	0.993639	0.991484	0.987892	0.990446	1.01152	1.00146	1.10945	0.987892	0.992921	0.987892	0.987892	1.00593	0.996353	1.01431	0.987892	1.04767	0.987892	0.990845	1.01615	0.987892	0.987892	1.00888	0.992043	0.993559	0.990606	0.995155	0.987892	0.987892	0.987892	0.991963	1.04161	0.987892	0.987892	0.990606	1.04568
XYLT2	7.38806	9.83258	6.38683	5.1711	6.46821	5.41632	3.82162	8.32771	7.50307	8.27504	7.70429	10.0897	5.85923	4.28197	4.92857	5.58952	6.79589	8.02437	4.31321	4.99175	4.69924	7.41508	6.95297	6.01109	4.83843	5.52112	9.33108	6.1509	5.09663	5.91543	7.82967	8.20886	4.68826	5.29931	7.14199	5.30868	8.87903	7.27458	8.37915	6.21708	6.09954	6.17486	3.66462	8.77316	4.99528	8.28226	8.16533	6.11036	5.77278
STMN4	1.11057	1.21557	1.11057	1.15104	1.11057	1.11057	1.11057	1.60895	1.13568	1.11057	1.40726	1.11617	1.11057	1.11873	1.11057	1.11057	1.1316	1.11881	1.16367	1.11057	1.11777	1.11057	1.11457	1.11057	1.11057	1.11057	1.12416	1.11057	1.11625	1.11057	1.11057	1.11057	1.11057	1.11057	1.11057	1.11057	1.11057	1.1332	1.132	1.11057	1.11497	1.12017	1.21717	1.11057	1.11057	1.43861	1.11057	1.14992	1.15439
NUDCD3	11.5159	9.72958	9.67639	8.35242	7.0434	6.12008	4.85631	9.46939	8.22774	9.32457	8.88035	11.8427	6.76681	10.8203	7.866	19.0471	9.69303	9.4111	8.58315	6.16449	4.84288	10.8803	9.87554	7.77848	8.32282	7.25659	8.21287	9.41155	7.14427	7.61406	11.0195	9.16007	8.50914	6.65251	7.6606	13.3907	12.6601	9.90141	10.47	12.5311	8.25117	7.26132	3.33372	7.63222	9.03081	9.63382	10.4205	8.05859	10.6508
ISL1	1.07401	1.238	1.0922	1.14765	1.07401	1.07401	1.08622	1.83638	1.07401	1.07401	1.13295	1.07401	1.07401	1.07401	1.39251	1.07401	1.09706	1.07401	1.09469	1.07401	1.07401	1.07401	1.08871	1.07401	1.08298	1.07401	1.07401	1.08498	1.08435	1.08198	1.09395	1.07401	1.07401	1.09096	1.07401	1.07401	1.09818	1.08223	1.11314	1.07401	1.07401	1.07401	1.07401	1.07401	1.07401	1.29607	1.08124	1.08198	1.16273
CHDH	1.11801	1.1518	1.11938	1.2993	1.36736	1.18705	1.52159	1.30389	1.31391	1.25939	1.36078	1.45973	1.30037	1.43893	1.21076	1.08436	1.4465	1.76077	1.21909	1.196	1.11869	1.3289	1.65747	1.14309	1.3435	1.2834	1.43901	1.14829	1.13666	1.21573	1.26252	1.4777	1.24326	1.15004	1.39458	1.14966	1.2571	1.28019	1.1895	3.66666	1.40804	1.10807	1.10577	1.20701	1.35788	1.37065	1.68843	1.3435	2.13078
IL20RA	1.06206	1.07329	1.06574	1.09223	1.06206	1.06206	1.102	1.14932	1.06677	1.06643	1.15061	1.07037	1.06206	1.0804	1.06206	1.06206	1.06206	1.06206	1.07337	1.06857	1.07286	1.06206	1.06206	1.0714	1.0804	1.07072	1.0654	1.06206	1.06206	1.07183	1.07834	1.06206	1.06206	1.06206	1.07174	1.06206	1.06703	1.1128	1.11649	1.07654	1.14135	1.06926	1.07912	1.06694	1.13432	1.111	1.06206	1.06532	1.10929
CLCA1	1.06849	1.06849	1.06849	1.10077	1.06849	1.06849	1.06849	1.06849	1.06849	1.06849	1.08351	1.06849	1.08306	1.06849	1.06849	1.06849	1.06849	1.07992	1.06849	1.06849	1.06849	1.06849	1.0797	1.06849	1.06849	1.06849	1.06849	1.06849	1.08418	1.06849	1.06849	1.06849	1.06849	1.06849	1.06849	1.06849	1.06849	1.06849	1.06849	1.06849	1.11781	1.08194	1.08979	1.06849	1.06849	1.06849	1.06849	1.06849	1.06849
CLCA4	1.12324	1.12324	1.13725	1.13935	1.12324	1.13935	1.12324	1.12324	1.12324	1.12324	1.12324	1.12324	1.12324	1.12324	1.12324	1.12324	1.13492	1.12324	1.12324	1.12324	1.12324	1.12324	1.13445	1.12324	1.12324	1.12324	1.12324	1.12324	1.12324	1.12324	1.12324	1.14986	1.12324	1.12324	1.12324	1.12324	1.12324	1.13585	1.12324	1.13398	1.12324	1.12324	1.12324	1.12324	1.12324	1.12324	1.12324	1.12324	1.12324
GLT8D1	10.1456	9.80544	7.83429	7.78578	9.86948	8.40549	5.4524	8.45184	6.5768	5.76048	8.65293	6.16991	8.66058	6.86834	12.0721	6.42739	9.1485	8.14577	7.61158	8.33357	11.7162	5.17507	6.68503	7.11779	8.44744	10.7328	10.0217	7.62131	9.35777	7.24309	3.8893	10.604	8.58665	6.32619	5.74828	4.88638	7.20392	7.11617	12.207	7.28689	9.24877	11.9968	4.7257	10.2094	4.27216	8.57405	8.96958	9.10284	10.9834
ATP2C1	5.46352	6.52435	8.51968	6.2216	9.19569	8.72339	5.34566	6.98832	5.42919	6.0465	10.1663	5.57343	10.2008	6.98346	9.6814	5.1559	5.82374	7.3915	6.13552	4.1658	7.31005	4.06074	5.62226	3.40757	5.98341	12.2674	5.30909	6.45524	10.5295	4.7892	3.53052	5.85073	10.2861	6.66852	3.83196	3.60318	6.4594	5.40667	9.09603	7.5946	12.0929	10.7826	4.35879	11.9142	3.08699	5.93851	6.77226	12.0078	14.3292
IGF1	1.30294	1.34258	1.27768	1.30178	1.31871	1.32218	1.25427	1.41351	1.28394	1.2749	1.31778	1.28069	1.26655	1.31198	1.31917	1.27466	1.34351	1.41004	1.28996	1.25427	1.27119	1.30248	1.29692	1.2837	1.30063	1.28834	1.65343	1.28973	1.2742	1.27466	1.29924	1.52455	1.26493	1.28695	1.29993	1.28394	1.30874	1.41421	1.32497	1.34583	1.2698	1.29947	1.26331	1.4003	1.3303	1.30943	1.34791	1.31593	1.31152
SLC38A5	-0.401824	34.4457	-0.264856	5.49411	0.0652987	-0.411879	-0.416602	1.72872	-0.0946747	0.0403886	-0.275292	-0.146399	-0.177023	3.24473	-0.383313	-0.420792	1.31591	93.2985	1.38729	13.5227	1.02773	1.7972	14.3275	12.0361	12.9497	-0.325874	2.26821	25.3432	-0.249392	1.1829	86.0492	1.50354	0.632671	-0.360992	2.47046	2.91664	7.61917	8.34263	0.882077	0.272045	1.02499	0.84117	1.11046	-0.325646	19.9728	-0.404033	36.9814	-0.37638	8.52744
RALBP1	6.8121	9.24441	6.14929	8.84966	7.71001	7.40893	5.08896	9.13137	5.88139	5.16789	7.86178	5.49274	6.11743	4.91612	8.88832	3.66266	9.99518	9.44024	8.15067	7.23802	4.35216	6.21264	9.51702	5.21242	13.0226	7.91734	7.94141	7.007	10.3651	7.84866	5.62306	8.44935	7.84049	5.24668	5.0733	3.54615	4.28464	6.81464	7.60252	5.60925	7.39813	9.03168	3.18272	9.20213	5.08271	7.40515	8.91216	7.9695	10.9142
RUFY3	4.02408	11.9166	3.04225	5.23598	4.32331	3.94482	3.09546	5.45152	2.85071	2.68468	3.37882	2.88774	3.49945	3.53924	3.85	2.55662	4.60169	3.74728	4.51705	5.72501	6.08202	3.41292	3.72281	3.75857	4.03356	4.10572	6.72153	3.11986	4.47339	5.10145	2.87558	5.55834	3.6373	2.865	3.63043	2.51833	3.0882	4.83941	3.83839	2.96306	3.68949	6.24695	3.03214	5.69193	2.70607	3.06301	4.71277	3.57698	5.09127
CNTN1	1.19672	1.24793	2.31555	1.3713	2.7377	3.42813	1.23257	1.53125	1.4551	1.5332	2.37383	1.81458	1.30458	1.3383	1.21972	1.26077	1.1669	1.28125	1.19591	1.1712	1.22273	1.17023	1.15731	1.15186	1.16942	2.14293	1.20241	1.15454	1.56344	1.17324	1.16649	1.15828	1.21851	1.21404	1.20103	1.22314	1.16665	1.64577	1.60237	1.28743	1.18153	2.04865	1.41389	4.90952	1.2528	1.40731	1.17324	1.19282	3.36936
SLC11A1	1.17528	1.20073	1.12247	1.1154	1.1874	1.31784	1.16814	1.15907	1.18283	1.23412	1.46288	1.12632	1.14004	1.18066	1.11725	1.16429	1.12817	1.28918	1.15851	1.09397	1.09991	1.2415	1.14358	1.10826	1.14406	1.1199	1.12656	1.09277	1.16356	1.14542	1.08915	1.14895	1.12311	1.18323	1.19166	1.22874	1.14679	1.1854	1.52838	1.10039	1.2635	1.10176	1.33461	1.25997	1.70794	1.15233	1.20916	1.21237	1.10232
WWTR1	12.1861	7.54133	2.31575	6.26704	3.62753	2.09023	2.09604	5.28667	2.23416	2.29036	2.91378	2.37573	3.01008	3.43636	11.4412	1.72117	11.9812	7.18807	2.13102	2.51384	8.22874	3.48006	4.57355	4.26164	4.24144	5.4651	9.13609	3.41128	2.14848	1.96344	2.21348	9.3569	3.49932	1.83539	2.8171	1.8335	3.00764	4.11693	2.23337	2.57216	2.96276	2.4581	2.36802	5.09165	2.22865	5.05989	12.0573	1.93592	7.51735
AGPS	4.23727	5.69353	4.20929	5.91266	5.54984	5.32157	3.58422	5.37249	3.37644	2.85306	4.26187	3.90109	3.38464	3.58217	6.31395	2.82681	6.77436	7.27268	5.79214	5.71434	4.68933	3.3245	5.35325	3.34058	6.53781	5.46889	5.8191	4.37159	7.25849	5.14808	2.95434	5.15084	5.00296	3.46023	3.70309	2.43056	4.408	4.99816	4.22167	3.81186	6.02885	6.60907	2.78204	8.79965	2.47124	4.85304	6.70665	4.44214	6.9998
CXorf56	8.24102	12.0214	7.56706	9.79018	7.54424	7.35205	4.56605	10.8054	5.62815	5.111	6.39615	6.57211	9.0372	8.07601	10.9627	6.3156	9.81132	9.73613	8.66989	7.28658	6.40557	8.47157	12.4765	6.10733	6.15702	8.6875	10.2657	9.70726	6.97372	8.02203	5.628	12.0142	9.55159	6.52195	4.94385	3.35257	4.42999	8.98589	11.6596	7.77019	9.16361	9.11369	2.32095	9.45098	4.07914	4.73014	9.42288	9.88927	10.2864
ATP1A2	1.30567	2.09002	1.33698	3.39108	1.19827	1.38559	1.24031	3.18208	1.56148	1.21455	10.9571	1.42786	1.26747	1.22888	1.58372	1.19647	1.37925	1.34379	1.62105	1.24524	1.22293	1.43397	1.30457	1.42778	1.37002	1.30317	1.71123	1.33643	1.24806	1.20978	1.3434	1.73988	1.27585	1.19765	1.25823	1.29902	1.32782	3.24494	1.47295	1.31608	1.258	1.21315	1.2605	1.28892	2.89746	2.24869	1.35593	1.37315	1.49025
TTC27	7.7603	8.03845	5.11195	6.88224	6.33125	6.52961	4.44709	8.32229	4.10147	4.54827	5.67048	6.44728	6.98849	4.55728	8.45109	4.26613	10.8882	8.15178	6.96934	6.50084	5.70841	4.52673	7.2364	6.11212	6.24123	6.57439	5.8192	7.12068	7.84055	7.51332	3.58119	8.01106	4.8862	4.55474	5.2596	3.17939	7.52117	7.59749	7.4246	5.66117	6.84138	6.19714	3.22571	10.06	3.39229	8.1978	13.5394	4.51657	6.61802
ZNF582	1.20409	1.26886	1.48891	1.41414	1.65511	1.47789	1.3117	1.29112	1.15934	1.24176	1.39086	1.27583	1.4888	1.68603	2.26108	1.33599	1.7083	1.49982	1.60069	2.09016	1.89822	1.22669	1.17395	1.44259	1.79409	1.76755	1.46991	1.74473	1.63835	2.00358	1.1319	1.07658	1.50736	1.38715	1.33588	1.02058	0.987518	1.41436	1.20589	1.35971	1.50792	1.72269	1.30889	1.86257	1.21871	1.21005	1.95253	1.92914	1.64443
VSIG2	1.09949	1.15582	1.11072	1.15155	1.12417	1.12552	1.11452	1.12718	1.11365	1.09949	1.12378	1.11207	1.13501	1.17322	1.09949	1.11254	1.14696	1.11808	1.12512	1.16784	1.09949	1.09949	1.11769	1.15566	1.13272	1.1256	1.18098	1.09949	1.12496	1.11911	1.13636	1.14261	1.09949	1.12038	1.11405	1.09949	1.09949	1.1199	1.11879	1.10827	1.09949	1.14284	1.13382	1.09949	1.1964	1.20503	1.13533	1.09949	1.16531
PHLDB1	5.60544	6.63503	2.00801	6.43719	2.35184	2.20745	1.86841	3.64701	3.26585	3.81459	3.51768	3.07835	3.7527	3.98195	3.78456	4.06475	5.37483	6.48524	3.50087	3.74958	4.68649	4.7832	4.65341	5.04453	13.4123	5.40676	3.08899	4.5275	5.44326	7.43842	6.361	5.18505	4.25932	1.81769	3.63721	2.42468	2.88469	3.96925	3.75331	3.6715	4.73059	4.38851	0.497117	3.42948	6.72338	8.61331	4.52271	2.48345	9.5867
MARCO	0.9108	1.227	1.04848	0.988373	3.44435	1.01766	1.34756	0.95421	1.37179	1.1186	5.33607	1.16501	0.986661	1.46751	1.02682	1.23496	0.927924	1.60733	1.07648	0.89282	0.956351	0.940425	1.35663	0.870729	1.0293	1.20474	1.28505	0.952755	1.04326	0.907632	1.05584	1.34173	0.947446	0.980924	1.6069	1.11295	1.0168	1.63148	0.885285	0.976301	3.13157	5.45911	2.87351	0.970393	1.65571	3.31934	0.884257	0.952241	0.887254
CYP24A1	1.30213	1.49953	1.27742	2.1097	1.18841	1.18179	1.19781	1.38093	1.19688	1.30086	1.47272	1.2556	1.18179	1.39752	1.19282	1.18179	1.41923	1.68741	1.22264	1.18702	1.19908	1.20291	1.33648	1.5333	1.50603	1.18876	1.18179	1.26152	1.18179	1.19224	1.19491	1.21046	1.21974	1.20407	1.91927	1.18179	1.21359	4.31459	1.19212	1.18179	1.18179	1.1876	1.20001	1.20523	1.42688	1.2267	1.29633	1.18179	1.54955
PRDM11	1.97583	2.46254	2.83209	2.05191	3.05866	2.23754	2.41541	2.21511	2.96141	3.1134	2.38098	3.05058	3.16367	3.4638	2.67053	2.04524	2.33298	1.92235	1.73491	2.21746	2.43478	2.61234	2.00352	1.95866	3.48404	3.40883	2.07442	2.36828	2.36396	1.86204	2.36969	1.93396	2.71766	2.1341	1.90917	2.05716	1.81553	2.18758	3.0494	3.10618	4.6765	3.28609	2.26617	3.24641	2.83091	4.14109	2.51823	2.08375	4.41581
SYT13	1.10891	1.55306	1.19344	1.18356	1.35656	1.43504	1.26953	1.53032	1.13424	1.0831	2.14307	1.17598	1.09701	1.10593	1.07034	1.07878	2.41317	1.12138	1.32067	1.08607	1.08607	1.23643	1.08789	1.19258	1.12388	1.09557	1.08348	1.32038	1.0949	1.07983	1.14163	1.27183	1.13597	1.12426	1.11735	1.08252	1.08473	1.12628	1.19805	1.08444	1.71311	1.21004	1.0924	1.15564	1.09375	1.14518	2.77222	1.14009	1.11275
SNAI2	11.3112	14.1901	22.6523	13.45	29.0059	29.0448	12.775	35.9816	13.1584	23.1521	15.5445	36.2252	21.1521	19.0807	46.2457	8.51908	14.8549	17.2794	1.66889	10.1336	20.9723	8.78599	14.7495	7.39169	9.01513	35.5315	10.0732	28.3385	17.765	9.9758	4.89605	29.9768	20.8039	17.6052	3.99035	4.65175	15.9224	14.756	25.9827	18.6812	10.5434	25.4281	22.1816	46.532	2.12969	12.5149	27.3371	29.5319	27.4053
CD74	26.3673	70.9754	13.15	26.6273	-3.99891	10.3077	-0.818446	291.183	57.7858	-0.0447912	240.76	41.2602	-31.2919	178.45	-8.12266	-22.2801	16.4432	176.747	20.1648	-29.9854	9.59111	81.5471	807.164	-6.03801	-17.6211	12.3736	1205.27	-7.9836	-16.3144	-27.426	112.609	529.404	-25.2016	-30.135	88.1278	2.50534	250.985	186.668	57.4742	51.882	-22.052	-19.8822	87.2608	200.066	173.488	90.1374	53.2101	-3.16116	12.0539
HGF	1.19034	1.23868	1.19182	1.29274	1.32522	1.23416	1.15566	1.3028	1.1766	1.15787	1.4778	1.16138	1.17632	1.25215	1.33813	1.14874	1.25723	1.25824	1.20234	1.16101	1.28075	1.16257	1.18296	1.17383	1.24662	1.26378	1.61323	1.15861	1.19468	1.15602	1.16507	1.24367	1.20612	1.18444	1.1778	1.14062	1.1503	1.29625	1.20593	1.18435	1.16156	1.16368	1.23831	1.32559	1.15418	1.23961	1.19163	1.22586	1.33094
ZRANB1	4.71719	6.6143	4.27734	5.71117	4.24831	3.90022	3.10148	5.88819	3.58618	3.19085	3.65931	3.6885	4.49162	3.21245	4.90715	3.32243	5.33695	5.01779	4.34552	3.67358	3.33216	4.23496	5.01713	3.21987	5.80459	5.94879	5.04517	4.21484	5.15268	3.95167	3.60679	5.09224	4.86543	3.48914	3.24048	2.93246	3.29556	4.83369	4.70153	4.00295	6.09109	4.55353	2.55757	6.18945	2.94244	3.81959	5.25854	4.36654	6.24452
NCDN	8.29187	14.8467	12.9128	8.24602	5.71341	6.6938	5.64246	11.6752	13.0862	8.78188	11.9919	12.3578	4.34179	9.25797	2.47498	10.0724	16.9058	16.2468	3.05951	3.23342	2.74075	16.9785	13.9864	5.65067	6.49032	4.95711	11.9777	6.52568	5.17899	3.38291	11.7711	11.3885	3.77733	8.37597	11.0633	9.49704	10.6503	4.8832	14.322	11.8778	10.483	4.6994	5.0409	5.89035	10.994	9.96447	16.517	6.43929	3.28003
ZFP64	3.02466	3.58542	3.51694	3.51178	3.29141	3.31937	2.54486	3.54413	3.34941	3.13674	3.4973	3.5714	3.8088	3.32738	4.03194	2.77602	3.73693	3.12434	3.07188	2.62204	2.34945	3.28386	3.17618	2.93801	3.74456	4.15288	2.98553	3.01488	3.25605	2.94155	3.18388	3.02913	3.76505	2.97444	2.51513	2.61365	3.40379	3.28656	7.03345	3.50554	3.73917	3.30851	2.15873	3.92873	2.81785	3.69233	3.71798	3.43599	4.26834
MNAT1	2.24437	3.62325	2.27758	3.2146	3.26489	3.03448	2.16417	2.95456	2.07566	1.97103	2.29485	1.88771	2.40222	1.84903	3.781	2.29211	3.49096	3.26008	4.06812	3.66693	3.29178	2.0734	2.6264	2.15171	3.84696	2.67915	2.17115	2.61687	3.39425	3.25131	1.95574	3.16073	2.87823	2.03019	2.16992	1.60173	2.64669	2.4176	2.74727	2.1669	2.76152	4.04368	1.96612	3.40708	1.83931	2.37533	3.50719	2.66339	4.09548
SAMD4A	5.1454	13.954	4.03566	14.0093	4.11518	6.04738	2.73206	6.43666	3.20794	1.8826	2.40896	2.85297	3.15541	5.76362	3.61536	2.48093	11.0956	11.0843	4.61874	5.61175	4.46687	6.83394	11.5811	7.50652	12.7646	7.47869	8.69836	8.0103	7.65579	4.984	6.48217	10.6979	5.87958	3.47729	4.84014	3.46845	5.32372	7.51452	5.73404	4.73958	6.9672	7.89122	1.54319	7.71838	3.07178	6.23798	6.77173	3.99229	9.23851
RUNX3	1.43483	1.8344	18.7776	1.53246	8.92662	9.85694	3.10658	4.64295	1.71382	1.03579	5.02641	1.86034	1.04062	1.85021	1.23143	1.11737	1.54351	2.38841	1.38977	1.30358	1.14539	1.67291	4.68087	1.10747	1.32123	1.60069	8.16185	1.28992	4.67089	2.8444	1.59286	3.11725	1.04131	7.74969	4.66076	1.01015	2.27627	2.10918	1.88429	1.52048	1.25906	1.0265	1.26205	1.82197	1.8265	1.23603	3.14642	4.23201	1.13649
PLEKHB1	5.44679	3.21655	1.99347	15.1017	1.3593	0.879449	0.985017	8.64449	3.73747	2.26195	15.8716	3.00587	2.67502	3.99127	3.42617	1.24856	6.83918	4.69823	22.2475	11.2623	4.45895	16.6347	2.94921	7.24404	12.5402	1.3326	17.2289	4.31657	1.3993	1.59972	4.17427	5.78723	6.2295	1.75989	9.89853	4.46557	3.17	5.64842	13.5434	2.50914	1.59158	1.16117	2.62064	5.99182	13.3287	14.8452	6.70943	2.99332	1.45977
SERPINB1	10.8016	17.1084	6.06028	19.3289	15.5628	16.1134	5.76957	18.3337	7.38866	6.01698	12.4037	11.9428	14.3208	6.73296	34.67	11.8678	20.7607	21.3949	16.1742	17.4313	10.5122	11.5747	18.769	9.66963	18.8383	24.411	29.3832	13.4147	18.235	16.4709	4.6526	20.4308	14.0306	8.73379	8.21104	2.17978	10.838	10.6307	9.92807	13.5	12.6416	19.1606	2.38755	19.9693	6.37436	11.7074	19.5139	16.6443	13.3376
CYP3A43	1.03162	1.07672	1.03162	1.06634	1.03989	1.03162	1.05172	1.03162	1.03162	1.04037	1.03162	1.03162	1.04739	1.03162	1.07999	1.03162	1.03797	1.03162	1.03162	1.06422	1.04249	1.03162	1.04374	1.03162	1.03903	1.06643	1.05201	1.0498	1.03162	1.03816	1.03162	1.0748	1.06557	1.03162	1.05105	1.03162	1.03162	1.03845	1.05095	1.03162	1.03162	1.03883	1.04306	1.06105	1.03162	1.03162	1.04355	1.03162	1.06086
SLC7A9	0.928054	0.956597	0.98478	0.993756	0.990345	0.944569	0.928054	0.980652	0.99968	0.928054	0.974189	0.944031	0.928054	0.951391	1.00668	0.928054	1.00004	1.06933	0.981908	1.08854	1.03074	0.978138	1.07723	0.963598	0.97006	0.944569	0.9925	0.962521	1.07274	1.03953	0.95911	0.996269	0.96665	0.928054	0.928054	0.951929	0.928054	0.953904	1.07454	0.939184	0.94062	1.07867	0.949775	0.983883	0.928054	0.954802	0.98478	0.953006	1.12211
SPAST	2.95524	3.89976	2.27046	3.66387	3.11572	2.65656	2.13305	3.99611	2.18367	2.16914	2.50959	2.26043	2.71793	2.40203	4.18399	2.02335	5.6912	3.88121	3.02742	3.05838	2.98051	2.88914	3.24547	2.46805	4.12737	3.27074	3.68046	2.92721	3.18553	2.87714	2.12799	3.86573	2.53202	2.15066	2.34114	1.99935	2.57064	2.87666	2.6418	2.30876	2.85005	3.38115	2.15105	5.01993	2.06118	3.17968	7.49085	2.77337	3.94596
NRXN3	1.06695	1.1585	1.05752	1.0945	1.05806	1.05838	1.06513	1.26001	1.0572	1.05677	1.1868	1.06459	1.06824	1.05881	1.0558	1.05345	1.07703	1.07531	1.07446	1.05795	1.05387	1.05184	1.05645	1.05184	1.06438	1.08142	1.10844	1.06384	1.08078	1.05923	1.05645	1.07628	1.05698	1.05709	1.05741	1.05666	1.05934	1.06213	1.08603	1.05409	1.08453	1.06824	1.08861	1.06663	1.06717	1.16107	1.06545	1.0692	1.50859
OSBPL5	3.78357	5.01143	5.3629	4.83955	3.84435	4.22455	4.16558	4.36008	5.43813	5.12293	5.61176	6.14558	4.8628	8.65281	4.43785	4.49689	4.21145	4.44793	3.69675	4.17106	3.37068	4.77035	5.38171	3.87007	4.20074	5.01223	5.69397	4.61394	3.11238	7.00214	6.70258	4.52927	5.61826	4.65973	4.73004	8.03471	5.39916	5.80951	4.88954	9.6546	3.60613	4.31239	3.49289	5.41115	4.45976	6.43055	4.06099	5.50733	5.37409
AQR	3.80288	5.29016	3.93349	4.92712	3.87196	3.9309	3.10672	4.78086	3.08896	3.2841	3.97549	3.21665	3.28686	3.19192	4.19219	2.78259	5.1011	4.75313	2.84591	4.30018	3.39768	4.8334	4.69282	3.88631	5.29705	4.48089	4.49216	4.13244	5.02076	2.80683	3.36315	4.24457	3.68784	3.07939	3.4983	2.4343	3.47138	4.18992	3.96665	3.54775	4.07359	4.18595	2.73362	4.61783	2.90914	4.12709	4.56699	3.27137	5.26211
CPS1	1.3513	1.368	1.3564	1.36554	3.12235	2.15867	4.10677	1.3651	2.44803	1.83855	1.85094	2.45769	2.89081	2.72412	3.35969	1.99681	1.3825	1.33496	4.03498	3.03008	4.83382	1.34524	1.47353	1.58724	1.77748	4.49121	1.38478	1.33241	4.379	1.3448	1.34638	1.32468	4.95324	2.48748	1.33391	1.87062	1.31703	1.40877	1.7404	1.90226	2.59486	1.69471	1.63328	1.39208	1.95041	2.40356	1.37854	2.19012	5.40287
C8B	0.972208	0.972208	0.972208	0.972208	0.972208	0.972208	0.972208	0.972208	0.972208	0.972208	0.972208	0.972208	0.972208	0.972208	0.972208	0.972208	0.972208	0.986827	0.972208	0.972208	0.997908	0.972208	0.972208	0.972208	0.972208	0.972208	0.972208	0.972208	0.972208	0.972208	0.972208	0.972208	0.972208	0.972208	0.972208	0.972208	0.972208	0.972208	0.972208	0.972208	0.972208	0.972208	0.972208	0.972208	0.972208	0.972208	0.972208	0.972208	0.972208
FHL1	3.45972	8.11598	2.34511	7.86755	6.96707	1.95024	1.80297	6.44757	2.82687	1.99644	3.87623	4.26484	2.96256	7.13805	3.20572	1.40285	6.27362	7.30865	10.0734	9.55563	5.38045	1.78765	8.08458	4.90082	1.81356	4.10309	3.2292	6.50809	2.30478	14.9765	3.65212	5.46125	6.39009	1.41565	3.42953	4.33551	2.77046	5.88744	6.19945	2.06634	6.47509	2.49619	3.36565	4.53553	7.48809	2.38154	5.47954	1.88415	7.96924
GABRA1	1.09836	1.18753	1.09779	1.10799	1.11349	1.10157	1.09504	1.32621	1.09504	1.09504	1.11017	1.09504	1.09504	1.09962	1.09768	1.10157	1.10215	1.09733	1.12266	1.09745	1.12736	1.10157	1.09504	1.09504	1.10329	1.11452	1.09756	1.09848	1.10776	1.09745	1.09504	1.09504	1.1026	1.09504	1.09871	1.09504	1.09504	1.10776	1.11189	1.10375	1.11487	1.10043	1.10364	1.09504	1.09504	1.1896	1.09504	1.09997	1.13871
NLRP2	1.11567	1.12602	4.04412	1.1281	2.60977	1.13128	1.11608	1.26658	1.11241	1.11241	5.11637	1.1185	1.11817	1.55347	1.12493	1.2609	1.63568	1.31958	1.15573	1.13837	1.11633	1.11241	1.21783	1.11241	1.13119	1.11558	1.52375	1.11567	1.11859	1.11475	1.12134	1.27142	1.91038	1.1175	1.13361	1.16274	1.12326	1.62308	1.12176	2.03834	2.11313	2.04811	1.14146	1.18353	1.1241	1.80154	1.14279	1.11241	1.13094
SLC45A4	4.77024	9.81496	4.79251	7.84051	3.49132	3.32653	2.74655	8.02214	4.14199	4.22071	4.56317	5.23125	6.19929	4.00044	4.12855	3.73013	8.01437	6.28092	3.33163	4.12232	4.28922	6.28359	6.59455	3.87306	3.43528	4.42599	7.09128	5.6568	3.16157	2.76291	5.30414	7.48055	6.50005	4.18799	4.03712	3.98101	5.01641	3.60121	3.68195	6.35291	3.78584	3.18846	2.47025	4.84045	3.77621	4.54333	8.85259	4.6814	3.9972
RNF10	16.0947	21.8145	23.4655	20.1803	20.6186	18.8027	23.8111	21.4003	21.5671	13.1529	30.4352	19.4282	16.4922	18.5394	19.7259	14.8719	21.9286	21.8881	16.9051	20.7475	14.0794	25.4974	21.1382	17.5409	26.3384	15.5577	31.9477	17.807	18.7712	16.7763	22.0833	21.7231	18.3755	14.6375	19.1644	21.203	10.6657	20.7696	29.2685	17.8064	16.5701	19.9994	14.1424	43.8999	15.0951	17.6028	20.2363	19.2714	18.7848
ZNF839	3.29275	3.9174	3.33066	3.23243	3.41094	3.74471	2.85047	3.50571	3.22914	2.76034	3.01155	3.34388	3.66864	2.67887	4.41957	3.30614	3.92027	3.53073	3.38617	3.06293	3.48339	2.92343	3.16318	2.81779	4.20989	3.67378	3.509	3.262	3.88295	3.4336	2.72815	3.28382	3.37691	2.81888	2.75553	2.58166	2.96926	3.18231	3.22215	3.30614	3.85431	4.25252	2.26971	3.77866	2.59825	3.11179	3.8351	2.97279	4.34552
ZDHHC6	6.81844	11.2197	5.58712	8.68483	7.29219	7.02814	5.54226	9.93203	4.71599	4.81704	6.01977	5.21826	5.92178	5.72344	8.45888	4.69766	10.5114	9.64797	7.73527	9.45146	9.03062	6.23989	9.32978	6.01471	7.48724	6.33258	9.42202	6.98934	8.26821	7.57472	5.15416	11.2749	6.81476	5.11728	6.60131	4.22407	4.62322	6.77221	7.25094	5.75917	6.29157	9.93878	5.09666	9.40707	4.12041	5.75127	11.8792	7.39225	9.09165
GRAMD1B	2.06241	2.41944	2.36916	2.34646	2.2909	2.1615	2.1341	2.59782	2.42285	2.05899	2.76101	2.14588	2.13564	2.16645	2.12156	2.09134	2.49779	2.51469	2.61506	2.20426	2.22961	2.24557	2.14614	2.19086	2.4033	2.08161	2.57384	2.25445	2.29491	2.16193	2.16014	2.21783	2.37266	2.10193	2.21655	2.02477	2.30242	2.57256	3.38187	6.4169	3.1783	2.50999	2.29994	2.23516	2.51358	2.51972	2.48132	2.13274	2.39008
RNH1	23.31	18.3526	23.2441	28.1876	16.0319	13.7129	26.376	25.9105	24.5725	47.1932	26.1807	40.4661	31.1171	44.4347	15.9817	35.6317	20.6262	27.3199	14.2841	23.4438	14.8812	32.4357	27.5067	33.4727	29.8514	19.8109	28.3634	34.4481	8.41728	31.5998	50.5257	22.4311	26.2631	24.8175	24.6185	32.8996	56.6526	35.2456	29.9937	60.4319	18.3723	15.7123	15.0838	20.2915	42.8179	61.4643	17.8627	21.0495	26.7107
NDUFS1	6.20054	11.8208	4.39932	10.428	5.69822	6.54376	3.65934	9.14065	2.86451	2.80944	4.25395	4.32244	4.50183	3.18546	5.63308	2.78313	11.7561	11.5282	7.78066	6.10436	4.30032	4.87022	8.14325	4.27805	7.61293	6.96882	10.7451	6.64414	7.28512	6.01993	3.56743	9.71223	5.61699	3.0407	3.43769	1.88275	5.25913	5.89538	5.14952	3.57101	7.81849	4.41175	2.42	12.2185	2.6871	4.88959	10.4136	5.29818	8.3832
RB1CC1	4.37146	19.4427	4.66817	11.6944	8.21906	6.06892	4.07043	10.7224	3.94986	3.40081	4.38275	3.67688	4.05319	4.22315	7.07822	3.20435	12.2594	15.3698	6.18594	6.8588	4.5813	4.57125	11.9863	4.94061	6.22466	5.63944	5.81944	5.65018	12.5094	5.34737	3.67603	17.5244	5.32171	3.63886	3.86515	3.26873	4.31404	4.63269	4.25259	3.51125	4.9362	10.2492	3.74172	12.1795	3.26942	4.12592	16.9595	4.55579	10.4139
ERP44	9.17711	13.3833	10.4132	13.83	8.94439	7.6112	5.4577	14.4703	4.58834	4.42879	9.16086	7.02979	5.74909	5.83188	11.2852	5.1628	12.1659	15.5692	13.327	11.4333	7.93212	7.85948	14.5638	10.7144	12.5677	7.84346	20.4582	11.5391	9.92066	13.9243	5.64952	17.3538	7.52552	5.75489	9.14186	1.7006	9.75898	9.36778	7.57694	7.72657	6.29029	8.95859	3.13634	9.24586	3.90804	6.84141	10.941	9.134	8.38435
ALAS1	13.6973	11.319	16.4691	12.0715	10.0017	12.9155	14.3009	15.6953	16.3104	14.1	19.048	18.6957	13.5657	11.3566	12.2176	10.6383	12.8581	11.8458	5.93342	6.75015	8.19613	11.0378	10.4277	10.0354	9.0953	13.0587	16.0931	12.0951	11.0332	10.2378	13.0834	14.5213	11.8759	11.6352	8.09185	11.3644	15.5158	11.5014	17.8904	15.0554	16.8436	13.3006	4.2949	10.8654	13.0605	14.7159	17.3941	17.6931	14.7595
BIRC3	1.14529	2.47155	1.1319	1.29496	1.23753	1.33954	1.14089	1.91911	1.12054	1.1223	1.27197	1.12159	1.11807	1.14485	1.22748	1.10538	1.28237	1.32897	1.22431	1.30219	1.1785	1.14503	1.52207	1.20475	1.26677	1.14732	3.14	1.14335	1.56902	1.16212	1.13172	2.61426	1.12062	1.11886	1.18669	1.10538	1.16934	1.31531	1.33522	1.13164	1.45802	1.30051	1.13111	1.48666	1.19365	1.14159	1.34553	1.13912	1.29576
AKAP11	3.86162	8.06308	4.06931	6.42011	4.83078	4.73573	3.26314	5.31772	3.42762	3.23863	4.23921	3.10847	3.79886	4.30936	5.62061	2.91704	6.60564	4.36984	6.18767	4.72427	4.31604	3.47507	5.743	3.65723	5.35527	5.20649	5.53861	4.49073	6.45208	4.23442	3.40272	5.06494	4.4491	3.12661	3.54074	2.82003	3.90121	4.745	4.32083	3.24821	6.15358	6.44029	3.11805	5.60734	3.02685	4.08714	5.2753	3.92485	6.8988
GLRX2	4.07676	5.63276	3.56778	7.53715	4.55751	4.12431	3.64848	4.98636	3.42538	3.81929	4.03085	3.42529	3.74956	4.23202	5.2269	3.52555	5.67179	5.88401	5.70011	5.41759	4.55693	3.99819	5.17214	4.10205	4.24642	4.69042	4.72029	4.53835	4.44939	5.21331	3.78671	5.98918	4.33219	3.67336	4.10778	3.33895	4.86581	3.7543	4.01342	3.66567	3.98854	4.75188	3.43741	6.09918	3.43782	3.68662	5.87607	4.16982	5.27682
SNAPC1	2.47073	4.14318	1.93542	3.73991	3.24224	2.61392	2.35458	3.70423	2.02314	1.89231	2.23063	2.0052	2.09134	2.21316	4.66186	2.00186	3.97853	3.90429	3.57498	3.75878	3.64569	2.43895	3.61048	2.60054	3.37595	3.18063	3.99684	2.56142	3.34343	3.46376	2.04414	5.41395	2.44118	2.09933	2.19755	1.85663	3.69587	2.40243	2.30478	1.92065	2.65304	3.62971	2.19569	3.40671	2.06235	2.14542	4.81824	2.24596	4.51607
DERA	9.70073	13.5094	15.4478	14.9714	16.6568	17.898	5.9944	14.8981	11.5135	11.1394	14.768	17.5128	14.9927	15.0683	22.8313	7.28179	17.9586	21.0993	14.2733	13.5422	12.9662	7.8476	14.7977	10.1043	24.5538	18.5523	12.2094	9.67302	18.5804	15.6798	8.14658	12.7194	19.918	15.4418	8.6753	5.28352	12.8603	10.0189	10.9427	27.2245	9.20867	17.6261	6.30796	22.9222	6.0228	25.0605	12.8749	24.7821	18.2853
STRAP	38.0452	50.2947	33.7783	43.7081	29.6023	33.6771	6.44718	50.7138	21.606	15.3334	36.2407	19.716	21.843	15.9945	36.2292	15.3635	45.6177	54.5206	31.6106	31.8678	19.8991	26.2931	37.3562	25.1292	48.2352	31.9874	41.1629	36.9993	37.3609	28.8922	25.1651	49.4739	26.9514	18.3052	16.4393	3.72792	14.713	37.2809	31.0756	25.4884	37.2164	36.9631	8.38863	23.1637	10.6512	20.0122	51.0778	22.6893	32.9986
ABCC2	1.01154	3.09658	1.10206	1.12467	1.02603	1.10532	1.00334	10.145	1.06559	1.00644	1.14282	1.00803	1.04211	0.999593	1.40125	1.01599	5.39945	1.24887	1.30969	1.05102	1.12212	1.29871	1.13446	1.02849	2.16659	1.06687	1.05174	1.01209	1.09577	1.10405	1.03271	1.42402	1.51542	1.01647	1.04625	1.00692	1.06416	1.04999	1.0773	1.03327	1.0023	1.04975	0.989323	1.01663	1.03884	1.05596	14.9551	1.23056	1.03009
DEF6	1.53631	3.87254	1.15061	2.46798	0.948541	1.39409	5.43079	3.68355	6.73109	3.61933	3.15151	1.73731	5.58578	1.79701	2.15523	4.21437	5.65215	2.92808	3.253	2.32829	3.38603	3.65271	4.43306	6.03134	1.98393	6.02621	11.4118	1.72912	1.20312	1.37128	2.5942	3.5023	5.17422	5.43721	2.64503	5.92678	2.65161	3.34332	2.66569	2.04976	2.9068	1.78829	1.79456	3.34837	1.79655	1.1771	8.67878	6.54861	1.38629
PLEKHO1	2.50557	2.80147	1.41763	4.74814	2.16202	1.47915	1.15056	3.70307	1.69102	1.21871	2.66308	1.67198	1.20252	5.093	10.9149	1.07377	2.56447	3.48627	1.56998	2.40866	5.7852	2.37281	3.59575	2.90425	1.19659	2.62947	10.3027	2.98258	1.17986	2.75984	2.14344	6.40075	1.34732	1.21316	3.47509	1.66303	1.70505	3.90244	3.00563	1.71377	1.15734	1.55194	2.54435	5.04821	2.74604	2.73517	4.46827	1.2945	3.97114
GCLM	2.47562	3.88376	2.4787	3.55691	3.00007	2.75508	2.31256	3.34086	2.22887	2.05655	2.6254	2.16295	2.27284	2.3038	2.3003	1.96593	2.73238	5.20496	2.77026	2.40193	2.19399	2.22511	3.08544	2.00006	2.36522	2.60371	3.58853	2.20575	3.16596	2.21944	2.01366	4.19184	2.09294	1.97619	2.33468	1.82975	2.40294	2.7449	2.77777	2.07575	3.21828	3.38492	2.00323	3.3074	1.93464	2.07366	3.36248	2.37081	2.84011
UBR2	4.67936	6.88211	5.12397	6.06345	6.53136	6.70727	2.40897	6.94686	4.02473	3.80106	5.91672	4.07082	4.7509	3.68267	10.9874	2.79956	7.21601	5.85974	4.6607	4.47428	5.40995	3.89819	6.04379	3.31638	7.2637	9.01941	8.27373	3.94504	9.31804	4.39703	2.683	5.73091	7.18859	3.50013	3.42852	2.07049	4.04728	4.36161	4.89268	3.77226	4.97472	6.32681	2.5506	8.5003	2.12253	4.6463	6.52603	6.27996	5.86408
EHD2	9.21099	5.94263	4.33372	11.693	3.84804	0.734906	6.66711	11.1769	11.0221	10.4455	5.34626	9.70816	4.51619	28.3699	5.24296	7.51446	12.715	12.5106	1.37999	14.5841	8.08129	11.7503	14.3481	15.9571	4.01834	2.15335	7.91853	17.0762	0.340349	5.88028	27.1351	10.8058	7.09836	2.35751	9.65807	20.4304	13.6791	20.2928	24.2021	7.45782	11.9886	0.923315	6.97938	0.880761	15.1341	8.9482	18.8012	0.657562	6.06108
DEPDC1	1.11912	1.26784	1.01904	1.278	1.15093	1.16661	1.02751	1.46095	1.01771	1.00158	1.12509	1.04301	1.05308	1.00951	1.17731	1.01227	2.00551	1.3337	1.13328	1.20457	1.02564	1.14015	1.23006	1.06413	1.11047	1.14549	1.1405	1.11074	1.40178	1.16198	1.04177	1.50319	1.0505	1.02894	1.13925	0.994271	1.12598	1.10976	1.01824	1.02092	1.00532	1.09898	1.00372	1.09978	1.00095	1.08169	1.84564	1.09203	1.03972
CCDC28A	4.50515	7.12586	15.7283	9.72076	12.1216	15.8969	9.87918	7.58199	12.1835	3.22037	10.6902	11.2431	5.17951	8.03789	8.18789	4.47758	6.90181	11.8137	23.245	9.57887	5.75761	5.96152	11.4134	3.79963	20.0292	6.68098	12.2683	5.27047	18.7512	9.71792	4.34879	7.36299	15.744	12.3169	7.02164	6.05088	8.15627	5.25164	13.2026	13.248	9.60115	16.8944	4.24213	14.2907	6.28274	6.36474	5.95264	22.7015	10.6966
RRAGD	9.87609	11.6353	21.7717	18.6582	15.7337	14.1468	13.1373	9.17185	19.7101	6.71844	14.8586	12.2621	12.7596	15.5305	5.95482	16.3099	7.75018	18.6801	18.6713	17.1134	5.78143	8.23179	16.6588	8.26716	23.7571	8.55587	17.1701	10.4865	16.081	22.0884	16.4733	8.75388	16.6219	12.7225	15.0185	7.87746	19.6765	12.0094	13.958	19.3421	33.6033	23.1447	8.93428	23.6037	11.9551	11.6011	6.81058	15.6814	19.7617
HSF2	2.27416	2.86724	4.80295	4.30305	5.8177	4.85663	3.38555	2.44281	3.87977	1.82227	3.80491	2.947	2.08319	4.6188	4.45713	1.60553	3.42044	5.71493	5.23152	4.12642	2.80343	1.77733	4.63966	1.80555	4.7952	4.03937	4.27697	2.63662	6.21606	5.71623	2.4119	2.92722	4.00639	4.0202	2.81532	2.07897	3.60865	3.20485	4.5247	3.18353	4.60699	6.51164	2.55724	6.40917	2.4491	3.61095	2.96403	4.59902	8.36275
PHF20	5.29472	9.43972	5.58635	6.45699	6.31895	4.85018	3.47692	7.44066	4.62478	3.17644	5.78103	3.56336	4.5728	5.07816	5.02443	3.25526	7.28379	6.42932	4.96985	5.74757	4.23642	3.69706	6.07061	3.30358	7.73321	5.42476	5.48299	4.66107	6.70449	5.65793	3.73288	6.21559	6.17953	4.22521	3.5007	2.2196	4.73866	4.66061	9.63143	4.22956	6.73277	6.95207	3.23414	5.33184	2.5328	4.1012	6.97257	5.44641	6.54648
HSD17B6	1.03997	1.03806	1.1	1.04667	1.12659	1.04667	1.01056	1.0933	1.01757	1.03128	1.14671	1.14518	1.09901	1.1749	3.70243	1.0069	1.09924	1.08568	1.04568	1.09665	1.16218	1.07197	1.11654	1.00004	1.09833	1.24682	1.10778	1.05795	1.09208	1.04294	1.0808	1.05559	1.13277	1.09818	1.00073	1.05246	0.991967	1.09543	1.63471	1.13863	1.19075	1.11578	1.00385	1.20827	1.07204	1.13818	1.1368	1.06122	1.52095
NR1H3	5.54605	3.70913	1.77318	3.35721	3.01278	2.70208	4.50177	4.22994	1.9071	7.02491	3.51023	6.31571	6.3394	5.68239	10.3886	5.48567	4.2608	3.19509	4.9051	5.70802	7.55874	4.9037	5.1174	6.10022	9.52624	5.37668	5.93941	7.07844	2.94251	5.58672	6.50409	4.61801	6.9502	2.97531	4.78434	6.27691	6.25775	5.58563	3.00514	7.40261	3.30135	4.34455	1.36065	3.80838	7.53514	13.3706	4.74959	3.50212	4.81301
TYMP	2.50068	8.98037	5.36678	6.19793	1.97535	3.59788	1.78648	16.9413	4.9872	3.29953	10.1274	5.35519	0.682263	4.44183	3.00871	2.86105	6.58505	6.34741	1.08035	3.29473	1.541	11.2709	18.7679	5.72989	2.15699	1.29026	30.4242	5.60883	1.05742	1.22679	5.31542	32.5857	0.773995	1.89832	4.03308	2.09969	11.1022	4.90171	18.7873	3.81495	2.31348	0.982221	2.96124	4.66309	8.54022	4.89112	8.16126	1.62755	0.823975
NCAPH2	6.4536	6.46807	8.80034	6.41819	8.10932	6.35863	11.0507	6.73483	9.91819	12.9834	7.7083	11.2735	11.8707	16.1007	9.31795	13.7725	5.74667	7.69033	6.83627	10.5245	7.31512	11.3967	8.47311	11.5663	7.26296	6.70963	5.60952	14.4456	4.82757	12.2741	13.3934	6.65304	11.0424	11.4479	12.3029	17.4278	11.6545	9.59728	12.8958	7.38419	7.17416	7.05574	9.27668	7.39478	17.6813	18.9679	6.0774	8.69654	9.64564
TOMM34	13.7683	10.9981	12.6933	15.927	18.2868	15.6088	8.47779	12.489	16.8277	14.353	21.7986	13.9272	13.1583	23.1071	22.4219	12.9205	32.9943	27.6505	25.6535	9.89364	13.0544	14.3443	15.2651	14.5677	16.0542	17.1664	14.0873	17.3091	10.705	15.1805	15.1958	11.3154	13.0865	14.1871	16.5024	13.1611	22.7838	17.6968	50.1481	25.4519	13.7041	18.5396	11.9082	17.6951	18.0529	31.2413	25.5	13.6895	18.4835
SEC63	6.29133	12.8867	8.88581	16.0772	10.033	6.75088	4.12209	10.5521	5.97433	2.64635	8.35787	3.8843	2.74883	7.10297	4.18028	1.64651	15.0643	15.2366	7.86056	8.34728	2.72634	4.46497	14.256	3.60482	15.3947	4.10367	15.6314	6.65417	9.17089	6.18073	5.78673	10.3543	5.77898	2.73386	5.97809	2.25359	7.23292	7.29356	6.58332	4.53835	8.4189	12.0896	2.58119	10.5335	3.43427	9.6421	11.8316	4.90617	12.9279
KPNA6	5.69335	11.034	6.60692	6.30921	5.9022	6.00589	4.21326	9.38846	5.86353	5.32085	6.82584	6.47164	6.07554	4.20034	3.67633	4.74703	10.0167	8.8703	4.19704	3.3335	2.68843	7.00564	8.66306	3.08891	5.35774	7.75187	8.69604	3.67833	6.80071	4.49659	4.5843	8.75477	4.38429	4.67101	4.28597	4.33209	4.17106	6.38585	6.24933	5.83233	7.80237	7.0699	2.50979	7.98355	4.07274	3.77342	9.51168	6.70508	4.55424
VIM	86.0032	22.0138	579.966	50.8412	640.604	329.529	1323.63	100.919	856.671	319.081	683.525	655.629	827.254	506.32	421.686	681.957	7.28633	102.082	270.08	595.221	573.069	24.6551	154.61	363.66	377.612	466.111	13.671	143.812	200.356	699.058	283.768	83.6223	492.413	670.176	317.757	388.926	700.996	293.643	511.914	598.653	214.949	407.488	820.083	483.899	309.221	292.789	111.624	723.993	303.354
FAS	1.97449	6.7408	1.83986	3.06649	2.41582	2.09691	1.56664	4.05798	1.9263	1.56389	2.42026	1.71881	1.7079	2.38727	1.88522	1.47632	2.49659	3.8226	1.68146	1.61863	3.44596	1.70102	4.29635	1.77752	1.84301	1.87738	3.90855	1.8101	2.00158	1.67377	1.75722	6.96025	1.76959	1.55111	2.15796	1.51497	2.73165	2.92507	3.12285	2.06432	3.06859	4.54985	1.82134	3.32548	1.85239	1.89371	3.35766	2.0737	3.78136
RNASET2	2.40204	2.65892	2.65593	3.03646	3.06771	2.51267	2.96487	2.73856	3.32254	2.41069	2.93833	2.27506	2.23259	3.81078	2.42833	2.26478	2.54007	3.5837	3.04784	2.94501	2.6799	2.39596	3.65819	2.71912	2.74549	2.43903	4.20689	2.62288	2.48519	2.66175	2.85201	3.18562	2.49238	2.22685	3.40671	2.34262	3.64629	2.87608	3.69544	2.58905	2.72708	2.99244	3.86755	3.04887	2.97386	3.0529	2.49366	2.33166	2.90288
CD44	135.803	198.244	195.269	224.845	190.715	201.022	125.716	151.286	179.81	199.362	219.432	216.085	168.24	193.837	134.843	143.9	124.966	159.141	164.62	172.498	123.097	159.302	208.376	175.534	350.543	245.074	81.8799	138.707	211.878	155.697	126.504	166.832	224.783	179.486	112.16	82.5346	131.179	106.071	115.079	328.152	198.193	217.306	67.9608	235.373	85.0322	159.227	142.025	214.322	163.121
KCNG1	1.675	1.78745	2.24017	2.03221	2.33071	2.67098	2.18891	1.78368	2.23837	2.13191	2.94595	2.58232	2.13653	1.97179	1.81312	2.42964	2.09485	2.4323	1.54423	2.4744	2.28715	1.94534	2.16315	1.86807	1.6334	1.96297	2.33508	2.90282	1.62664	3.07398	2.79413	1.80619	1.93747	2.36417	2.41167	1.7575	2.52121	1.96563	4.51951	1.74894	1.95219	2.03614	3.01458	1.60713	1.58907	3.02451	2.21492	1.81115	1.90281
AGPAT4	1.04022	1.50127	2.44144	2.3781	1.05852	1.09843	1.05999	1.55411	1.67896	1.01508	1.6587	1.17226	1.02277	1.39681	1.16897	1.01703	1.48162	1.84895	1.10417	2.02029	1.11564	1.4477	1.75413	1.22083	1.59182	1.04559	1.37826	1.30125	1.03448	1.28405	1.71044	1.50005	1.05926	1.03131	1.27502	1.06084	1.21815	1.34043	1.25732	1.29637	1.02045	1.08513	1.08989	1.33945	1.19215	1.28295	1.56302	1.04168	1.19618
SLAMF7	1.10689	1.66814	1.08682	1.25661	1.04686	2.82737	1.10185	3.30559	1.4635	0.989693	3.12891	1.04833	0.995503	1.24817	1.3972	0.985821	1.62632	2.58346	8.6826	1.00968	1.28287	1.19891	2.41623	1.01936	1.02037	1.21138	17.8002	0.990158	1.0938	1.00402	1.16901	4.27435	1.12447	1.18032	1.26893	4.82585	2.5912	1.5762	1.19054	1.1759	0.983962	0.994031	1.14407	2.63326	1.19836	1.26281	1.57992	2.26991	1.00387
BTN3A1	3.15571	8.29335	3.2168	5.38406	5.00128	5.484	2.91126	16.6006	3.49979	2.58386	4.12138	3.55921	4.01573	3.08189	12.3917	2.5182	5.6893	3.85949	3.2945	1.68583	4.88786	5.21328	23.6561	2.34231	3.06529	4.83385	40.6462	1.65285	5.46214	3.29564	2.01788	26.3505	3.81798	2.42564	3.30097	2.19666	6.7412	3.58694	10.1429	4.16335	4.90286	6.252	1.78768	11.2029	1.89105	4.86843	8.423	2.99376	6.11032
MIPEP	7.48359	5.20108	5.68289	7.38319	6.27208	5.72467	5.18011	8.38684	5.24548	5.93729	6.06986	6.21037	6.20997	7.54888	11.484	6.44094	7.8839	4.89163	12.2679	9.05117	5.81227	5.15112	6.8963	5.25882	5.61458	8.77873	7.74689	8.64466	6.48304	6.30345	6.01474	7.10019	8.38803	7.09797	5.31403	4.1825	8.05412	7.17072	7.03983	5.7307	7.75809	6.19289	2.94621	6.08503	6.27581	7.08399	7.93927	7.27255	6.61942
PRKCH	2.30882	3.11685	4.20994	2.44699	3.5853	6.16687	3.30728	3.52631	2.93206	2.56899	3.30998	4.52538	2.96662	2.45023	4.08198	3.16401	3.11399	5.86024	6.82374	2.27967	2.60455	4.94853	4.89341	3.96407	16.5639	3.50667	8.34833	3.29344	8.67043	2.72401	2.55275	3.19586	5.56976	3.44119	2.91266	2.74682	4.23104	2.55291	4.03196	5.00203	5.35537	4.25316	1.81493	4.22153	3.45997	2.47613	2.41683	4.26429	5.44505
INSRR	0.933698	0.927849	0.942659	1.02467	0.927849	0.927849	0.934445	0.933947	0.927849	0.927849	0.996919	0.988581	0.927849	0.927849	0.927849	0.939298	0.944525	0.927849	0.935316	0.940667	0.927849	0.927849	0.943779	0.927849	0.932703	0.973522	0.959086	0.927849	0.933449	0.927849	0.9332	0.942036	0.932329	0.927849	0.927849	0.927849	0.927849	0.927849	0.93208	0.935565	0.927849	0.927849	0.935316	0.940667	1.00215	0.927849	0.947512	0.927849	1.02392
IFNGR1	4.22902	11.7416	6.36368	12.0469	9.15145	7.48265	4.67954	7.50159	4.65922	2.30134	5.23481	3.87252	3.03313	6.55608	4.95614	2.44711	9.92895	14.6699	11.6719	11.0385	4.9359	3.15843	11.1122	4.21621	15.9325	4.92991	17.21	5.32783	10.1389	10.2256	4.20878	11.0117	5.73594	3.53189	5.32246	2.12182	6.6389	6.20141	5.4348	3.8025	8.67962	10.6397	4.03064	10.2629	3.51371	4.58154	8.00748	5.97236	11.7383
B4GALT7	7.88398	9.92994	10.8645	6.15003	9.12757	7.92071	6.39513	9.17524	9.242	7.42851	8.58979	8.04268	5.73514	7.81822	6.22341	7.37091	10.939	9.84339	5.55456	4.84837	7.69979	11.816	9.29367	8.02782	7.19041	5.87698	10.4736	6.59664	6.12854	4.26261	8.57539	9.50458	5.73806	8.32289	7.78834	6.71923	9.21805	5.69078	9.69963	10.2319	8.16142	8.18506	7.12388	5.94959	5.63426	5.45061	10.4791	8.70221	4.7428
SH2D2A	1.8864	1.13823	1.14984	1.73413	1.03573	1.03349	0.945549	2.91844	1.3861	2.09719	1.74629	1.04371	1.10169	1.78956	2.44554	1.38331	1.24776	1.23174	1.03991	1.09844	1.84143	1.63838	2.40242	1.41296	0.835471	1.16749	5.0426	1.95298	1.06894	0.855443	1.41729	2.40157	1.20333	1.11059	1.50724	1.27253	2.10911	1.41234	1.43889	1.60586	0.881298	0.887259	1.16803	1.37224	2.71888	1.31828	2.16106	0.789257	1.59224
VRK2	2.34672	6.31778	1.85313	4.65564	3.15089	2.79909	1.91432	4.6281	1.62726	1.56298	2.27724	1.90273	2.12012	1.77918	3.26651	1.58468	4.53245	5.32303	3.43074	2.56894	2.15769	1.90784	3.93336	2.04207	3.19831	2.9821	4.36649	2.53493	3.74934	2.85107	1.70386	5.79173	2.37936	1.61668	1.84848	1.40276	2.11766	2.40061	2.12468	2.16243	3.08368	3.94785	1.33091	4.64597	1.79368	2.29921	6.64897	2.61617	3.62879
TNFRSF1B	8.1088	10.7836	2.88215	3.85945	2.21896	2.34891	2.05239	15.2315	3.9151	1.74353	7.96821	3.26077	1.47791	4.88523	2.83321	3.03886	4.07682	4.41921	1.55422	1.89036	2.45783	6.28347	14.3524	4.10295	2.48095	2.61091	23.8301	1.96821	2.19706	1.60124	5.39042	20.7539	2.19475	1.23634	5.57772	2.04329	6.11852	6.40348	7.92127	4.17949	2.08029	1.64432	3.51644	5.42957	4.83043	5.74614	6.03064	2.25403	2.11251
VEZT	3.0928	4.72912	2.52123	4.54374	3.76019	3.40181	2.3955	3.90272	2.35997	2.37564	2.90051	2.37613	2.85509	2.75211	3.84307	2.416	4.79182	4.06446	4.55452	3.38067	3.41017	2.45507	3.65303	2.72429	4.22532	3.70986	3.56766	2.61143	4.32758	3.21129	2.35153	4.68925	3.10284	2.47195	2.58964	2.17226	2.56279	3.00557	2.8136	2.61737	3.38348	4.63507	2.22941	7.30086	2.38585	2.82108	4.41166	3.26756	5.88737
POU2F2	1.28211	1.33416	1.27848	1.30391	1.32784	1.31007	1.28109	1.45174	1.28733	1.26695	1.41155	1.27161	1.26379	1.38809	1.29159	1.24595	1.27785	1.30075	1.28583	1.27595	1.28203	1.28393	1.43516	1.24444	1.27256	1.29783	3.02752	1.25503	1.31457	1.26206	1.25898	1.5548	1.26308	1.24887	1.28662	1.27169	1.31149	1.2859	1.34016	1.26624	1.25613	1.30975	1.2574	1.3877	1.28954	1.29941	1.2769	1.27627	1.3892
BRD9	6.01887	6.46551	5.51708	5.93288	5.78559	5.27789	3.07497	6.13571	4.89028	4.70251	5.3455	5.39838	3.44096	4.57279	4.12607	3.01999	5.91636	4.62016	3.36712	3.68849	3.91327	5.27085	6.06842	4.37627	6.61296	3.69716	5.05473	6.08332	5.23158	3.63659	4.80396	6.6281	2.94088	3.27894	5.51733	3.55975	4.97959	5.92502	5.95231	4.74421	4.45684	6.0349	3.66695	5.26866	7.38138	4.21295	5.88753	3.63594	6.15433
SNX1	10.2737	14.4349	6.79886	13.9119	8.64442	7.44661	4.53894	11.4765	5.55137	5.75847	6.98546	6.69645	6.20833	7.67863	9.5472	4.43044	12.7561	12.6798	4.98324	8.64625	6.72807	16.6582	12.1494	9.54209	21.6269	8.74637	14.2731	10.8466	9.72557	4.2241	7.39959	12.2267	8.61653	5.35905	7.1944	3.19529	6.7949	12.5645	9.30131	8.2741	11.3204	11.4935	3.45184	12.4052	6.98623	10.5049	11.7935	7.75703	17.398
TBPL1	2.38035	2.90172	3.64829	3.65278	3.71434	3.55953	2.76948	3.07378	3.3238	2.18683	3.03017	2.6458	2.36072	3.30936	2.74116	2.13761	3.26267	3.44426	3.50414	3.20026	2.612	2.2017	3.54312	2.24026	3.22775	2.66796	3.60693	2.26873	3.91052	3.24962	2.39984	3.08051	2.90691	2.8396	2.62014	2.30925	3.02526	2.59195	3.60342	2.91532	3.6403	4.03603	2.63023	4.28058	2.27476	2.89274	3.15076	3.22018	4.16854
ARNTL2	0.944846	0.958795	0.940836	1.00997	0.949815	0.953477	0.952867	0.986343	0.945369	0.941708	0.968994	0.938569	0.938395	0.939877	0.942754	0.935693	1.02235	0.997327	0.951297	0.951297	0.954261	0.944759	0.966815	0.977363	0.96603	0.947636	1.21248	0.957487	0.941534	0.951385	0.944149	1.02182	0.940313	0.940487	0.962369	0.935693	0.945892	0.973005	0.944498	0.945718	0.935693	0.938134	0.939616	0.972656	0.941185	0.935693	0.995061	0.944672	0.94319
BCLAF1	4.84195	8.24008	5.88601	9.38631	8.14161	6.80284	4.26157	7.23962	3.72115	3.27162	5.70491	3.3459	3.96191	5.18946	8.22045	2.72432	8.98625	10.1466	9.23722	10.0132	5.0426	3.8612	9.36065	4.16442	9.8176	6.04391	8.50874	5.38423	11.5204	9.32193	3.85308	7.5082	6.66974	4.19309	5.05698	2.63443	5.13713	5.96307	5.20252	3.59655	5.97142	10.5679	3.11657	10.7282	3.65437	5.33306	6.97118	6.26682	13.3
SLC39A9	8.3813	14.3595	6.06076	13.4725	5.4376	5.44034	4.54642	12.3363	4.2628	3.94031	7.24796	5.9045	5.92519	4.45642	9.3179	6.51502	13.7782	11.4731	7.84928	8.93545	5.88312	10.4792	10.4604	10.0589	13.5161	6.67365	11.6324	11.7288	7.45459	7.5538	6.03695	12.8646	6.88378	4.14328	5.47275	1.6772	11.7796	8.74922	8.67626	6.43141	6.24282	5.32683	3.1602	6.52354	2.88723	5.83428	12.7353	6.0511	8.17673
ANK1	1.18271	1.24377	1.15271	1.21961	1.15658	1.13989	1.13718	1.22922	1.14269	1.13998	1.19512	1.15017	1.14072	1.16422	1.19717	1.13266	1.29603	1.15156	1.13562	1.13496	1.14671	1.17318	1.14852	1.18756	1.1463	1.18715	1.22018	1.16685	1.14146	1.13357	1.14967	1.32143	1.15781	1.14252	1.16742	1.15715	1.14951	1.25018	1.15239	1.1394	1.14614	1.13537	1.15715	1.20046	1.1477	1.23078	1.40172	1.15411	1.16594
IBSP	1.16492	1.78505	1.15285	1.17645	1.15285	1.15285	1.20744	1.17793	1.15285	1.15285	1.18587	1.15285	1.15285	1.15285	1.15285	1.15285	1.92614	1.15285	1.31513	1.15285	1.15285	1.15285	1.16928	1.15285	1.15285	1.15285	1.16204	1.15285	1.15285	1.17948	1.18626	1.62137	1.15285	1.17178	1.15285	1.16999	1.15285	1.16212	1.15285	1.15285	1.15285	1.15285	1.15285	1.15285	1.19677	1.15285	1.48565	1.15285	1.15285
TFB1M	3.32735	3.98962	3.99575	4.2517	4.90154	4.38916	3.14368	3.47063	2.7945	2.07143	2.99865	2.70525	2.07581	3.16304	3.24169	2.00736	4.61539	6.40042	5.05278	4.21369	2.80278	2.72469	5.05701	2.78055	4.59324	2.5658	4.47682	3.16129	5.81171	3.40592	2.96303	3.81965	2.72891	2.40459	3.35038	2.09342	3.00518	2.66572	2.73585	2.84717	3.66179	5.05374	2.10179	3.59438	2.24323	2.77991	4.11409	3.12033	4.55523
RABEP1	6.52208	7.64612	4.2781	8.05863	4.73012	5.73502	3.06609	9.83753	2.54497	2.77604	3.76726	2.84878	3.56503	2.76521	11.9206	2.64577	13.0182	8.80974	6.10695	5.24985	4.00591	4.43558	6.41872	3.54454	9.13651	6.0652	8.1531	5.58775	7.6271	5.74299	2.76305	8.27571	4.63928	2.86517	3.82764	1.91121	4.68257	6.17513	3.58273	3.38112	5.60005	7.07266	1.84642	6.94851	2.50168	4.12689	9.35661	4.90885	7.10273
HMGB3	6.94409	4.0778	2.14161	5.48219	3.97414	2.91629	3.65352	8.86843	1.99252	3.06562	3.71839	2.4894	4.80381	2.72596	6.18782	3.6201	8.07581	8.53565	3.35929	4.13145	3.02003	6.87393	3.66158	4.44993	3.43838	4.78959	6.49943	5.6839	2.68708	4.01839	3.71744	6.49018	3.64467	4.35433	5.74402	3.96584	2.81097	5.76954	2.4247	4.30132	1.71922	3.418	1.68264	2.60642	2.55293	3.05463	9.17064	7.40771	4.27682
NUP160	3.94609	7.21202	3.34806	6.1222	4.31301	4.04016	2.53523	5.88627	2.23924	2.69678	3.3967	3.0153	4.17214	3.30263	5.88872	2.12258	7.06402	5.90319	6.81376	4.97516	5.28387	2.7812	5.25598	3.33197	7.63547	7.16322	5.00013	4.12656	5.51375	5.56431	3.19378	5.4013	4.31248	2.16233	2.57453	1.59494	4.45304	4.60303	3.73834	3.42182	5.42129	4.68844	1.61241	6.63291	2.27011	5.77466	6.91549	3.10446	7.77359
BAK1	11.2977	10.1425	9.6347	6.87907	5.00586	8.13325	5.5777	14.4393	9.92375	9.40086	16.2973	13.9764	9.22507	5.25016	12.5255	7.27458	15.115	7.54293	3.31151	5.30255	7.49932	15.6384	7.73499	8.49225	2.95846	7.44793	10.3639	9.16382	6.28264	4.60967	9.63058	10.0885	9.67433	10.1988	5.33523	9.20193	5.07123	5.46544	7.99716	13.4323	3.69311	3.78002	3.63843	8.19579	7.02776	7.13238	19.5193	12.7914	4.82854
MUSK	1.10107	1.10107	1.10107	1.10107	1.10107	1.10107	1.10107	1.10107	1.10107	1.10107	1.10107	1.11196	1.10107	1.10107	1.10107	1.10107	1.10107	1.10107	1.10107	1.10521	1.10107	1.10107	1.10107	1.10107	1.10107	1.10107	1.11435	1.10695	1.10652	1.10543	1.10107	1.10107	1.10107	1.10107	1.10107	1.10107	1.1076	1.10107	1.10107	1.10107	1.10107	1.10107	1.10107	1.10739	1.10107	1.12851	1.10107	1.10107	1.10107
IKZF2	1.18715	1.41152	1.26308	1.30245	1.35907	1.35002	1.23007	1.70081	1.19058	1.17224	1.35344	1.22579	1.22029	1.18752	1.38731	1.1671	1.25159	1.22897	1.21955	1.18899	1.3148	1.1627	1.43414	1.16967	1.18434	1.26956	1.8391	1.15854	1.71035	1.15341	1.15842	1.36224	1.1561	1.17187	1.19241	1.16478	1.1583	1.19155	1.31028	1.16734	1.34867	1.37924	1.2434	1.57964	1.18691	1.21087	1.29585	1.1984	1.35014
GRN	123.298	108.403	124.62	66.4379	38.4375	51.8828	149.582	120.606	101.505	151.768	98.2398	435.739	81.7573	68.3888	70.0973	185.433	133.892	133.369	48.1899	51.4189	41.3338	248.098	116.124	154.982	131.918	60.3213	153.004	132.075	25.4764	10.4979	205.912	150.147	85.3402	98.532	79.5394	234.743	239.445	111.533	88.061	131.367	15.8165	32.4372	0.326712	105.668	141.624	262.873	125.103	136.101	26.0302
FAM13B	6.12259	8.71252	7.39706	7.926	8.78179	8.71515	4.99667	6.32778	5.17629	4.19442	6.38133	4.51484	4.98714	6.13445	6.01806	4.40907	8.36467	8.64642	7.00016	7.1308	6.51414	4.92375	6.73607	4.99411	10.8181	6.82604	7.00465	6.68408	9.89849	6.35134	4.71182	6.89438	6.00132	4.48764	5.40388	3.70686	5.29663	7.16722	6.11306	4.85169	10.3829	10.821	4.79961	8.39225	4.52987	5.23665	7.09888	6.08028	7.43875
ARHGAP31	2.96902	1.75132	2.16252	2.02131	4.35056	1.53085	2.66527	1.82417	2.39188	3.03622	1.99512	3.1548	4.73565	5.50522	1.86349	2.01637	2.02224	2.41845	2.05831	1.3731	1.91069	1.76376	1.68852	1.99381	2.43035	3.85593	2.89447	2.04804	2.39597	2.3212	2.0278	1.8064	5.12322	2.41536	1.87013	3.11023	2.22432	2.49926	3.31803	3.24557	2.89177	4.28945	2.34692	1.69616	1.84811	2.71015	1.54174	2.55804	7.79615
CENPQ	1.85643	3.48621	1.84463	2.93216	3.38888	2.98569	1.59857	2.99623	1.67167	1.66177	1.42323	1.80393	1.50266	2.00976	5.28294	1.20077	3.69664	3.1981	2.59351	2.44082	2.23515	1.4222	2.74502	1.5855	2.98553	3.19691	2.98316	1.86348	3.33582	2.32298	1.41713	2.97896	1.75427	1.442	1.53268	1.42133	1.97752	1.67048	2.3697	1.31457	2.51123	3.29583	1.6445	4.82732	1.14002	1.74437	4.3786	1.97602	4.59076
RANBP3	6.94104	8.40801	8.78777	8.54774	8.74438	5.13	8.77961	9.25655	10.4006	11.1084	7.56336	13.9352	11.1339	15.3813	7.44856	10.2107	9.10629	10.5569	7.77059	8.07225	9.34274	13.9702	9.77811	10.9783	11.5701	8.47696	10.7499	11.7255	5.2766	9.21018	12.9345	8.81851	13.1091	11.0402	11.3677	13.726	9.02933	10.0031	11.139	12.0736	8.40603	10.3087	6.29981	9.53884	14.4716	9.06663	8.67298	10.522	14.6355
ARID4A	2.53346	4.55311	2.3952	3.76298	3.57766	3.12355	2.31107	3.30274	2.2108	2.28241	2.37166	2.17306	2.71197	2.43386	4.0316	2.15566	3.67557	3.7139	3.50899	3.9104	3.16995	2.26198	3.57598	2.49294	3.7508	3.34199	3.01648	2.92142	4.87795	3.57505	2.25517	3.7908	2.84611	2.24938	2.4879	2.04951	2.55304	2.80552	2.45722	2.16608	2.77106	4.93704	2.42268	5.24163	2.21298	2.60994	3.62615	2.51379	5.2876
PNPLA6	8.09213	9.11915	12.1508	8.45001	8.2574	6.54999	8.04987	10.7382	13.6757	9.3015	12.7431	11.5032	9.31558	21.9386	7.01795	8.64598	9.79051	17.5785	5.94545	5.97937	8.50765	18.2615	12.0712	9.60801	10.4833	6.61605	12.857	11.6669	6.22678	5.35509	17.6187	10.1393	10.4	9.674	11.3978	19.4264	13.1546	10.878	19.1427	13.8812	8.5284	7.05952	9.90327	5.06809	16.6272	10.1214	11.3631	8.57111	10.3894
IFT88	4.28857	5.21505	3.61771	4.90347	5.90635	3.99372	3.45161	5.18375	3.44419	3.15719	3.38374	3.15796	3.54923	4.12403	4.82852	2.96487	5.93317	4.22475	5.60399	4.7171	4.48442	3.6284	5.54414	3.52897	5.5745	4.6438	4.95383	5.01532	5.14235	3.97819	2.98074	6.46743	4.44622	3.09147	3.88066	2.74237	4.02864	5.05594	4.27227	3.21436	4.70149	6.85612	3.05801	7.91782	3.33407	4.41845	5.43824	4.0841	8.47243
ALG1	7.99495	8.37485	4.72495	7.7519	3.47414	3.56498	3.72444	9.97796	4.03369	5.50869	5.60546	5.6662	4.95092	3.70463	4.94617	6.80543	9.5144	8.85628	4.1452	4.89907	3.42493	11.7435	8.46749	8.41072	8.35419	3.91353	9.5657	8.71374	3.36575	4.80238	10.4326	9.31836	5.50323	5.79408	5.57349	5.28778	9.6553	7.04482	5.90644	6.98072	4.12414	3.19748	2.55417	3.98246	5.35663	4.57212	10.9832	5.54643	3.89965
ZCCHC8	3.21668	4.84133	3.07567	4.23525	3.9451	3.59755	3.71793	4.21809	3.14059	2.97743	3.20721	3.12005	4.13659	3.00397	4.5965	3.08632	4.19036	3.92912	4.64274	4.48592	4.44559	3.01877	3.91078	3.33335	4.22959	4.41913	4.05424	3.49584	4.38929	4.87701	2.9781	4.43443	4.43891	3.26885	3.37224	2.63977	3.06434	3.50227	3.88727	3.07178	3.27333	4.50181	2.9426	3.71878	3.2024	3.23731	4.10886	4.17108	4.37973
ABCF2	5.88419	4.24622	5.56143	4.1015	5.12476	4.43634	4.16049	4.75157	5.56383	4.8205	5.49995	5.32384	3.46759	6.0687	3.74312	2.45801	4.48629	4.95354	4.60076	4.82794	4.99716	5.13621	4.995	5.23467	3.66059	3.58726	5.06048	4.67329	3.98478	4.94945	4.7691	5.38556	4.1753	5.0925	5.66157	3.75648	5.41174	4.42129	5.14606	5.25932	4.78864	4.27496	3.90073	4.3948	5.47434	4.02081	5.07121	4.58891	4.10822
CHPF2	15.0195	23.0665	9.28394	12.4678	6.11843	7.6839	4.97845	15.7431	9.17186	7.42439	8.2772	11.6509	6.35019	7.52084	6.8948	3.4816	18.6691	10.3435	4.89358	4.01334	4.81102	14.6011	15.3291	9.10945	8.01455	5.69165	18.8246	6.49025	6.64963	3.8801	9.9437	20.49	7.65576	5.79438	8.33439	9.11689	12.4966	11.0196	9.23733	9.25289	6.32504	5.26563	2.55313	4.81516	13.662	9.87386	20.7512	6.21557	8.91611
LRRC7	1.1129	1.1336	1.11378	1.11767	1.12005	1.12469	1.11001	1.12043	1.10989	1.10776	1.11052	1.10964	1.11315	1.11052	1.11566	1.10976	1.13535	1.12833	1.11491	1.11591	1.11516	1.11077	1.12444	1.10989	1.11202	1.11277	1.11867	1.10776	1.12519	1.13021	1.10863	1.12833	1.10851	1.11415	1.11666	1.10776	1.10888	1.11089	1.1129	1.10914	1.11077	1.12758	1.10901	1.12344	1.10964	1.10939	1.11804	1.11001	1.12118
FUT8	2.19443	3.96801	1.88529	2.90973	2.57818	2.20882	1.54222	3.46026	1.61247	1.48287	3.09223	1.62678	1.65277	1.63791	2.24235	1.57661	3.13642	3.21584	2.14924	2.32489	1.95802	1.8586	2.84719	2.27145	2.38362	2.09719	4.4308	2.31501	2.24111	3.54762	1.73071	3.61593	1.88163	1.48645	1.7031	1.34922	2.49346	2.41536	2.20221	1.846	2.34683	2.528	1.53981	2.77492	1.5255	1.67891	3.60955	2.40929	2.9981
UBA6	2.36802	4.82556	2.02335	3.49466	3.12051	2.78244	1.96257	3.07066	1.86846	1.72962	2.20591	1.77428	1.98286	2.12501	2.40356	1.67341	3.91757	2.78141	4.06239	3.23293	3.16571	2.01879	3.28758	2.26244	3.10887	2.79415	3.45614	1.98545	4.05185	3.06201	1.89213	3.40496	2.50333	1.87554	2.17477	1.64652	1.95558	2.65806	2.29695	1.89873	2.7105	4.06828	1.9654	4.01529	1.79629	2.31055	3.49301	2.36394	4.72265
GAB2	12.0527	17.0028	7.06557	20.5129	6.12251	5.79278	8.63333	17.1268	8.29475	11.6381	9.79153	16.4516	12.2555	14.9117	9.33067	7.52681	18.991	16.9015	7.53527	8.4563	4.17242	25.3359	15.9714	11.2174	28.8896	10.0809	12.1297	35.907	10.0304	18.559	19.7005	8.78999	11.6376	6.50179	9.89422	16.3754	14.6293	16.0442	6.40474	42.99	8.50204	7.52315	2.01298	12.4808	10.927	18.3743	16.0345	11.7054	11.7088
ATP6V0A1	10.6415	12.2863	27.7218	11.2573	12.8841	7.04794	9.23211	13.9018	20.9601	21.8774	10.0806	47.3022	28.8276	15.3028	9.73413	15.6031	10.672	14.1745	6.76565	4.29296	12.1559	23.7393	13.8546	6.12857	11.7345	15.0238	10.7079	12.5364	9.01511	3.53292	18.1579	8.78996	20.8024	25.3574	13.1072	25.5564	40.184	11.8262	17.1902	43.9831	14.6945	11.6151	6.89477	28.7044	10.8434	38.3571	12.3289	17.0862	13.0444
PIAS1	3.23417	4.63267	3.55866	4.12112	3.78106	3.72479	3.20393	4.14554	3.15464	3.15518	3.57074	3.35647	3.49729	3.16108	3.91785	2.93134	4.17972	3.84297	3.14041	3.42205	3.3087	3.5965	4.10662	3.06992	4.32465	4.15896	4.28484	3.48825	4.24717	3.08781	3.04514	4.00168	3.48163	3.15482	3.19588	2.90343	3.27873	3.5727	3.61225	3.40863	3.90327	4.40132	2.87077	4.64806	2.97017	3.3757	3.97055	3.66315	4.83387
SLC4A7	2.2226	3.3253	2.25987	2.55332	3.03798	2.63981	1.98672	2.43952	1.98696	2.15881	2.38521	2.11318	2.31243	2.38832	2.15571	1.93488	2.96527	2.57912	2.3411	2.4193	4.35928	2.01189	2.61902	2.12433	2.43196	2.9026	2.68751	2.25183	3.82748	2.35432	1.98935	2.74954	2.46222	2.00806	2.12815	1.89849	2.12982	2.63782	2.20978	1.9864	2.54146	3.59327	2.07583	3.98333	1.91585	2.61074	2.74325	2.12982	5.50116
APBA2	7.96513	6.70461	12.0655	6.25068	8.73652	7.4415	3.56837	6.81867	8.64464	2.22328	5.55476	5.67652	4.49856	8.26718	6.63514	5.33034	8.60028	8.14573	4.1141	4.41138	4.64921	9.28988	5.75554	6.6614	4.69472	4.27168	6.5572	10.5874	8.32048	2.99968	6.31991	6.98949	7.34191	6.9794	6.88575	7.10578	4.80794	6.68813	11.1217	4.47993	7.22008	5.14873	4.58321	5.67082	6.75505	8.06248	8.48059	4.56842	12.7432
EFCAB1	1.6797	0.939262	8.19933	0.968669	3.48025	1.09863	1.87049	1.44375	2.81724	0.933753	1.3927	4.06729	0.933753	4.01445	2.77721	1.26506	0.956875	1.58077	1.34156	0.959979	1.2663	1.05937	1.05332	0.96797	0.936469	1.25164	0.94865	1.0101	2.46615	0.943297	1.0655	0.95478	1.27383	1.50443	0.95509	1.16427	0.959203	1.0108	3.28643	2.16386	1.17195	3.57304	1.31844	3.19526	1.04603	0.933753	1.06053	0.962539	1.8213
TMSB10	692.164	116.729	717.151	667.824	1174.65	393.315	734.682	530.651	842.952	794.549	1144.44	1089.96	705.065	1485.53	1031.64	486.033	353.593	762.396	358.783	1031.55	936.434	675.843	922.185	1293.62	523.836	512.344	1291.3	565.635	203.145	1145.12	722.794	794.722	578.655	923.169	1019.43	1060.09	781.661	1196.02	734.63	747.027	161.893	523.025	1547.08	1343.66	978.755	1299.12	829.873	647.986	1550.12
ASTE1	2.31926	2.31424	3.06518	2.21141	3.40416	2.96967	2.63245	2.12246	2.92585	2.36122	2.99557	2.71681	3.01961	2.48525	3.25947	2.14715	2.02542	2.29282	2.30265	2.03187	3.05513	1.57181	2.11808	1.67628	2.43182	3.25576	2.45892	2.03503	2.94662	2.22878	1.898	2.26736	2.44089	2.64359	1.99143	1.90128	2.6437	2.17524	3.6403	2.80139	3.42131	3.65101	1.98761	3.86716	1.71201	2.32527	2.14803	3.0301	4.09566
RNF19A	7.58742	9.71818	2.85483	9.8926	3.61626	3.60127	2.68065	9.03542	2.45917	2.71155	2.8379	2.6756	3.75589	3.10357	4.51017	2.41366	8.36058	7.4801	5.36223	4.6717	6.9271	3.7475	6.81318	3.47819	4.35991	4.72319	8.40407	5.78989	5.07109	4.17407	2.72965	10.0685	3.73376	2.76289	3.53946	2.17712	3.34174	5.00703	3.40791	3.1302	4.2706	4.83237	2.43533	5.84767	2.31193	3.04843	9.53941	3.99694	4.95018
PEX3	2.65992	3.1137	2.98526	3.92619	3.50758	3.37971	2.42209	3.19612	2.63962	2.03545	2.7204	2.46713	2.08081	3.23623	2.46359	1.95746	3.21913	4.61237	2.84054	2.76781	2.21188	2.19783	3.64103	2.20079	4.25687	2.15798	3.5181	2.44124	4.14314	2.31296	2.33934	3.08617	2.47395	1.97538	2.52597	1.91835	3.84122	2.82723	3.44496	2.56097	4.00089	4.46305	2.30795	3.99218	2.09379	2.68342	3.14526	2.55013	4.40734
GABARAPL2	8.44677	13.6321	13.958	21.1476	25.0294	17.384	13.1786	12.5077	18.3011	12.533	9.46672	18.2194	17.6819	14.2987	11.1777	12.3563	19.5698	21.3605	24.1558	9.20829	9.49468	12.5823	21.991	17.6432	29.2862	20.1951	13.5503	8.65357	22.4337	14.8072	10.9188	13.5186	19.1768	14.0984	9.71579	7.11363	16.7237	13.8687	23.8984	20.8218	35.4669	32.6492	7.83363	27.3671	14.0523	17.1512	16.5726	24.5177	25.3653
MYOC	1.20997	1.19981	1.23709	1.59852	1.32344	1.20095	1.19232	11.9522	1.20172	1.24481	1.70068	1.37647	1.20806	1.40038	1.19232	1.20103	1.19232	1.23564	1.19232	1.19232	1.21387	1.19232	1.19835	1.22968	1.19232	1.2183	1.19232	1.19232	1.19232	1.19232	1.19232	1.19232	1.21937	1.22006	1.19232	1.19232	1.19232	3.97053	1.20516	1.19232	1.2254	1.19232	1.38602	1.25093	2.67331	1.19232	1.19232	1.19232	1.28699
SH3YL1	2.49291	3.63004	2.42438	3.56823	3.26917	3.05258	2.43053	2.86994	2.2214	2.20468	2.46152	2.4093	2.83977	2.77787	3.71112	2.10753	4.38671	3.39091	5.31939	3.75121	4.05314	2.261	3.02168	2.63179	2.99602	3.16981	3.1608	2.7814	3.63636	3.25696	2.32051	3.55216	3.21695	2.22501	2.58858	2.13868	2.56366	2.72032	2.75402	2.3588	2.70057	4.49378	2.34355	3.81999	2.31158	2.64326	4.2398	2.61564	4.76972
VCL	4.54812	7.96177	6.3603	8.6104	5.61541	6.42006	4.58893	5.92392	5.42625	4.56415	7.54426	5.86018	5.2328	4.56224	6.23826	4.69778	7.95349	7.33232	8.38549	5.68851	4.74019	5.36182	4.80187	3.85946	5.95951	8.14594	5.86348	7.17853	5.96803	8.52034	6.37242	6.50942	6.54501	4.6552	3.81474	3.76702	3.938	7.78703	5.4462	6.5118	6.31988	6.67763	2.50061	2.22332	4.24828	4.93518	6.59464	6.49661	5.98498
DEPDC1B	1.841	1.75966	1.28279	2.33315	1.65938	1.70872	1.38659	2.20732	1.32889	1.31479	1.56762	1.39246	1.5848	1.42799	2.61123	1.35121	2.48437	2.17238	2.21055	2.29262	1.59141	1.59464	1.8551	1.53664	1.71224	1.73749	1.92014	1.83528	1.83366	2.77992	1.55367	2.13376	1.83381	1.37705	1.66041	1.31244	1.4694	1.54692	1.42256	1.33315	1.32228	1.52666	1.29527	1.62209	1.61813	1.49729	2.56835	1.48114	1.47571
DAPK2	1.21453	1.13529	1.16925	1.15327	1.20907	1.17657	1.12464	1.18044	1.15727	1.11186	1.2136	1.1803	1.09787	1.18097	1.15487	1.10227	1.15181	1.2072	1.14754	1.19588	1.17471	1.27512	1.16339	1.16938	1.13436	1.19322	1.64386	1.24196	1.13809	1.22784	1.13596	1.20614	1.14621	1.14235	1.26673	1.11265	1.12158	1.29975	1.28111	1.09761	1.30362	1.17578	1.14328	1.17884	1.24795	1.17697	1.16059	1.12278	1.48699
NSMAF	7.98889	21.3643	5.08305	21.5978	6.346	6.19715	3.63143	21.9787	4.48392	3.19923	4.64757	4.20461	3.93744	5.12837	6.39406	2.34337	29.0365	15.5828	6.73677	11.0929	4.03311	8.40049	15.5375	8.52363	10.4045	6.69885	8.44443	12.0435	6.02511	5.45177	5.95874	20.2346	8.91791	3.55292	4.48736	1.55573	7.30859	8.33419	6.50805	3.65767	8.37173	6.45327	2.61345	9.00213	3.91371	4.93413	22.8688	4.35888	5.43766
STAP1	1.07607	1.08129	1.06501	1.07568	1.05694	1.07568	1.05694	1.17671	1.05694	1.05694	1.0657	1.06601	1.05694	1.11002	1.16887	1.05694	1.07061	1.07038	1.06923	1.08506	1.08037	1.06647	1.07	1.05694	1.05694	1.07576	2.17201	1.05694	1.05694	1.05694	1.05694	1.1734	1.05694	1.05694	1.06747	1.05694	1.09988	1.08636	1.18915	1.08221	1.07131	1.05694	1.06931	1.06754	1.07438	1.05694	1.06339	1.05694	1.05694
TIMP2	65.5006	110.022	183.948	123.543	80.8062	74.4561	30.2634	53.513	109.369	144.014	365.362	206.859	103.204	77.1579	36.9568	110.963	122.195	75.6618	68.1467	30.9743	18.7458	107.477	80.2929	103.557	190.898	47.9517	36.0087	51.8445	48.2578	212.428	188.489	59.4652	112.151	117.198	75.6495	143.451	197.794	140.756	76.8417	122.367	65.6739	65.366	39.9275	76.3911	71.4585	337.72	49.7449	190.46	157.063
RFC1	6.33091	15.6586	6.05066	7.27627	8.03221	6.87959	3.92417	9.41421	4.25952	3.8049	5.76825	8.01008	5.6383	4.19674	9.4146	3.37072	16.6884	12.7869	9.16746	6.28957	4.72913	4.84186	9.83479	5.32876	9.17699	8.89527	10.6384	9.44764	11.4209	7.13918	3.70154	8.91364	6.80014	5.72552	4.52334	3.32093	3.07133	6.79068	6.85723	4.04313	6.38509	11.5028	2.73013	11.8366	4.02722	5.67226	15.5237	8.62692	15.8075
TBC1D23	3.67634	5.83834	3.34498	4.82346	5.02786	4.81509	3.34246	4.56354	2.96892	2.9304	3.7946	3.0094	3.57946	3.24843	6.14076	2.60205	4.72357	4.7104	4.14595	3.94308	4.97024	2.70193	4.30573	2.94291	4.74381	5.93075	4.65782	3.00793	6.55933	3.7772	2.49362	4.76429	4.20707	2.91024	2.95218	2.60416	3.60409	3.58344	4.0181	3.24501	4.56777	6.43116	2.86716	7.02951	2.50281	3.4573	5.01096	4.74405	6.96709
CUL3	4.18775	6.72272	3.53402	5.46482	4.45062	4.06754	2.9469	5.70459	2.90568	2.85775	3.75362	3.07899	3.46551	2.92985	4.81658	2.57234	5.95107	5.06339	4.84763	4.45808	3.32539	3.10202	5.05093	3.06408	4.88607	4.96489	4.4176	4.21168	5.80333	4.18636	2.84529	5.49432	4.1957	2.97615	2.91068	2.40764	3.59162	3.93488	3.51902	2.86037	4.78102	3.87654	2.33831	8.81176	2.77843	4.66867	6.04293	3.85671	6.49771
MYOM2	2.17153	2.11776	2.34302	3.36709	2.76141	2.33404	2.31022	2.23876	2.63143	2.68819	2.65334	3.45284	2.47001	2.02303	3.07936	2.79272	2.58761	2.17289	2.62762	2.15084	2.3633	2.84526	2.24189	2.81436	2.93005	2.93808	2.25373	2.15016	3.15408	2.35582	3.11761	2.70343	2.84294	2.33431	2.83056	2.17452	2.25278	2.96694	3.43269	2.61115	2.87125	2.62	2.02303	2.50118	2.64273	2.31675	2.54977	2.31607	3.59657
OTC	0.981988	0.981988	0.981988	0.981988	0.981988	0.981988	0.981988	0.981988	0.981988	0.981988	1.00817	0.981988	1.00758	0.981988	0.981988	0.981988	0.981988	1.00202	0.981988	0.981988	0.981988	0.981988	0.981988	0.981988	0.981988	1.01016	0.981988	0.981988	0.981988	0.981988	0.981988	0.981988	0.981988	0.981988	0.981988	0.981988	0.981988	0.981988	0.981988	0.981988	0.981988	0.981988	0.981988	0.981988	0.981988	1.02742	0.981988	0.981988	0.981988
CYP46A1	0.958998	0.966344	1.05082	0.967079	1.13641	1.05578	0.977363	1.02603	1.09986	0.925389	1.13714	1.37663	0.973874	1.06037	0.957529	1.04238	0.935674	1.14247	1.22952	0.929797	0.965793	0.934939	0.921349	0.916758	0.941367	0.985995	0.945591	0.935858	0.938245	0.957896	0.928144	0.936592	1.00032	1.18673	0.938429	0.95606	0.923186	0.96763	1.09931	0.942653	1.06992	1.32961	1.15422	1.05468	1.04091	0.992607	0.946693	1.23007	1.18508
ZZZ3	5.89864	7.50067	4.6279	5.74075	6.59932	5.72063	4.8744	6.81495	3.88714	3.84363	5.50142	6.31313	6.11245	5.05249	8.48793	3.37442	9.93016	6.03545	4.77259	5.82395	4.61374	3.62458	5.97285	3.33131	6.12382	8.48968	8.64526	3.75749	9.39707	3.89931	3.01156	5.47541	4.89747	5.65724	4.26337	3.00806	5.06577	4.55138	5.12567	4.65224	7.83514	8.85135	4.88832	12.973	3.70993	3.36162	6.77009	9.23346	8.13938
SLC18A1	1.07878	1.0907	1.0907	1.07878	1.10463	1.09249	1.07878	1.07878	1.07878	1.07878	1.0916	1.07878	1.07878	1.07878	1.14419	1.07878	1.07878	1.09834	1.08777	1.07878	1.07878	1.07878	1.08822	1.07878	1.07878	1.07878	1.10014	1.07878	1.07878	1.07878	1.07878	1.09002	1.07878	1.07878	1.07878	1.07878	1.07878	1.07878	1.07878	1.088	1.07878	1.07878	1.07878	1.09429	1.1552	1.10104	1.08822	1.07878	1.07878
USP2	1.36402	2.11748	2.28015	2.68741	2.23796	1.96175	1.41603	1.92954	2.70554	1.10548	2.33429	1.34019	1.16968	3.28491	1.00785	1.48884	1.39639	1.61845	1.30455	1.12216	1.19725	1.33501	1.39707	1.30653	1.40834	1.45914	2.10675	1.237	1.94614	0.93642	1.41466	1.57184	1.18757	1.27782	1.34338	2.20643	1.54161	1.2638	4.17012	1.23167	2.35325	3.0218	2.02846	0.855088	2.81901	1.42662	1.5838	1.25847	1.8843
CASR	1.07568	1.07963	1.07568	1.08025	1.07568	1.07568	1.09519	1.08056	1.07568	1.07568	1.07708	1.07568	1.07568	1.08002	1.07692	1.07568	1.07568	1.07568	1.07568	1.07568	1.63432	1.07723	1.07568	1.07568	1.077	1.07878	1.07684	1.07568	1.07568	1.07684	1.07715	1.07692	1.07568	1.08551	1.07568	1.07568	1.07917	1.07808	1.07568	1.07568	1.07568	1.07568	1.07568	1.07568	1.08427	1.07816	1.07568	1.07568	1.07824
TUBG2	5.6015	8.02321	3.5196	7.8315	5.47801	4.37783	3.22123	6.53104	3.58945	4.22386	2.81295	14.8021	4.37806	7.86909	6.42677	5.22795	7.91192	6.89046	7.33871	6.68933	5.05237	5.40662	5.78055	5.46443	5.21923	3.53102	6.31826	7.20334	3.47893	6.14923	6.32775	8.63717	5.74104	4.04326	5.56893	6.79167	14.1751	6.21352	9.52395	5.78132	4.66023	7.63925	2.8669	9.05733	10.7075	9.31565	7.65106	6.2755	9.11452
RPL26L1	14.8332	16.5576	9.75322	14.2129	13.0761	9.18336	8.74414	18.0711	7.33197	8.19307	11.3613	7.47453	8.95138	6.44499	14.2091	7.81127	21.2103	22.9219	10.6572	18.4745	15.0846	12.8347	14.6422	17.4532	19.1974	9.40869	17.2609	14.6646	9.44718	15.909	9.90281	22.6285	8.71719	7.89359	12.0095	4.57284	15.2287	12.2307	12.1758	8.59158	10.2523	13.667	5.25976	9.71741	6.82824	5.68324	23.5604	10.7395	7.79188
FLT4	1.74237	1.61744	1.62141	1.56344	1.3627	1.70881	1.57069	1.61317	1.61813	1.44683	1.53812	2.30859	1.43478	1.87439	1.34638	1.51204	1.91672	1.83046	1.47619	1.30733	1.39748	1.69195	1.28201	1.59204	1.6031	1.58312	2.34016	1.60997	1.26577	1.5366	2.10297	1.57526	1.49739	1.22862	1.56604	1.64246	1.43623	1.63796	1.67777	1.9219	1.40038	1.24487	1.59975	1.47039	1.79286	1.53293	1.70721	1.57259	1.56497
NSUN2	9.17064	12.6918	9.50542	11.576	9.40944	9.44635	5.90351	12.2461	7.46903	7.61269	9.33104	7.97406	7.88786	6.47081	10.1403	6.1164	13.378	10.3759	7.5472	8.24755	8.51943	8.68579	11.4657	7.1814	14.8374	9.15933	10.2475	10.9419	11.2569	8.74142	8.06232	11.9769	5.96517	6.54929	7.56791	4.76186	9.42434	10.3565	9.02675	8.58072	9.39936	9.93296	3.6261	9.48975	6.53424	6.88758	12.4206	7.531	11.9671
FBXO42	4.48139	5.8853	4.37955	3.68318	4.38924	4.42576	3.72462	5.03892	4.48714	3.45948	4.36946	4.01512	4.72774	3.45161	2.81604	3.86208	4.88587	4.14223	2.91575	2.92289	2.72258	4.42428	4.59784	2.84214	3.33114	4.51143	4.79487	2.76508	4.19114	3.05443	3.03753	5.37061	3.24358	4.11679	3.71749	3.7211	3.28757	4.09776	4.82744	4.25211	4.58167	4.72971	2.72758	4.55016	2.94537	3.50856	5.00642	4.58085	3.48041
MFAP3	2.5342	3.8144	2.7934	3.21161	2.41339	2.70841	2.10613	3.09649	2.23416	2.01453	2.89952	2.31728	2.41058	2.09255	2.87966	1.97878	3.57168	3.14828	2.56094	2.16353	2.17881	2.37875	2.7883	2.06283	4.22634	3.00972	2.98255	2.32704	3.69427	2.34827	2.23951	2.5539	2.68617	2.09221	2.06869	1.82647	2.39658	2.64092	2.50168	2.3082	3.34397	2.67683	1.84031	2.92363	1.92869	2.33944	2.96574	2.4133	2.54362
MRI1	3.17237	6.41891	3.44106	5.1126	4.11937	4.24034	3.33143	3.77642	3.32864	3.44146	2.97755	3.13716	4.58448	3.39794	4.18532	3.23577	5.77126	4.58624	3.78553	3.82409	4.21119	3.50119	3.73267	3.7365	3.48713	4.27819	3.5245	3.44817	4.44195	4.36538	3.41894	5.14358	3.87623	3.09133	3.43683	3.14547	3.13948	3.59924	3.10858	3.13157	3.56395	5.26327	2.66454	4.77101	3.03743	3.08917	5.15811	4.35237	4.99682
METTL1	7.9427	7.27599	8.6556	8.91743	5.90323	6.25221	6.15097	9.95892	6.72876	10.8245	7.39031	10.2137	5.49111	9.57683	9.14724	10.7442	9.49853	10.1375	6.69004	8.09667	11.0601	10.2271	9.57206	9.87008	8.4328	6.94871	9.30499	8.92082	5.31866	8.01014	10.4098	9.4545	6.79204	11.1052	9.08642	12.2203	8.65013	7.51942	7.11839	12.0394	5.52529	5.40689	3.48536	3.51562	10.631	9.58453	12.696	5.25415	5.51467
HOXC8	1.47194	1.47194	1.53632	1.47194	1.47194	1.47194	1.47194	1.47194	1.47194	1.47194	1.51375	1.47194	1.47194	1.493	1.75702	1.48694	1.85276	1.47194	1.47194	1.47194	1.49057	1.47194	1.48239	1.47194	1.47194	1.47194	1.47194	1.47194	1.47194	1.47194	1.47194	1.47194	1.4836	1.49587	1.47194	1.47194	1.47194	1.47194	1.47194	1.47194	1.4833	1.47194	1.47194	1.47194	1.47194	1.47194	1.47194	1.47194	1.47194
AGA	7.93561	11.6733	8.08755	9.34399	10.6085	10.0245	7.08003	6.29179	5.17564	3.29709	8.52157	4.6564	4.43522	7.06656	3.83437	4.6538	12.514	8.29243	11.8811	8.33394	3.44746	8.09984	8.28448	8.8687	10.6892	4.73289	8.07377	4.45184	12.8068	4.66711	5.51545	6.46571	6.35488	4.24074	7.0137	4.08974	8.45973	7.43	8.5541	4.19238	8.42114	9.10225	4.12511	9.47727	2.37109	4.65798	9.55666	7.89654	9.25916
BOD1L1	2.19697	7.20008	2.6759	3.70438	3.21632	2.63325	1.94285	3.7765	2.13067	2.32863	2.39442	2.18388	2.60986	1.91548	4.2399	1.67918	4.84999	4.37671	2.91567	3.36513	2.53351	2.25321	3.58403	2.28015	2.7123	2.94565	3.82185	4.34614	4.95201	3.23558	2.24046	3.98333	2.91009	2.10086	2.05399	1.89386	1.68391	2.72412	2.36418	1.73475	2.38783	4.35906	1.61913	3.52711	2.12594	2.83121	5.58845	2.10457	6.56575
MAT2B	5.95391	12.1376	7.91423	8.98751	10.0567	10.0924	5.36054	11.7015	4.8172	5.21709	8.06674	9.08984	7.82331	4.02892	14.4964	4.05945	11.1497	9.5846	11.04	6.25603	5.63488	5.75137	12.4189	5.14095	17.957	13.0923	11.377	6.71151	14.537	6.87772	4.02473	11.7568	9.23496	6.77996	3.90207	3.24627	6.88671	6.04832	8.33186	8.68835	9.38412	11.8491	2.41626	14.0423	2.77008	4.15729	10.2965	13.4813	6.31215
TLL1	1.16068	1.1783	1.149	1.15484	1.13864	1.14696	1.14387	1.15927	1.14015	1.13147	1.14333	1.13891	1.1359	1.17299	1.13714	1.13138	1.14776	1.14369	1.13563	1.13661	1.13528	1.13413	1.13608	1.13723	1.14431	1.14962	1.26106	1.13422	1.13643	1.13466	1.13616	1.159	1.13696	1.12882	1.13466	1.12882	1.13183	1.18591	1.14811	1.13758	1.14679	1.13749	1.14254	1.15821	1.12882	1.14989	1.1521	1.14059	1.15511
EDC4	3.00554	4.9964	7.37374	6.24712	5.44477	6.01677	5.13903	3.85357	7.20187	8.53154	3.41326	8.68945	9.6304	4.19087	3.99682	5.29717	7.68444	5.85234	4.68694	1.98726	2.11764	5.98598	7.80869	4.03436	9.86874	10.6686	3.75871	3.38488	7.44347	5.18627	7.37777	3.17151	8.42668	5.27631	4.27107	7.03419	5.19356	6.16537	6.81919	6.81446	5.77882	6.83944	1.85743	6.86992	4.50328	6.97703	4.18428	7.54786	7.81722
TRIO	3.04029	6.46249	3.38778	5.29525	3.11788	3.00003	2.27322	4.91969	2.52871	2.90281	2.85604	2.91929	3.03998	2.33916	3.61237	1.89099	6.62657	4.80759	3.09258	3.49015	2.7779	3.28596	4.18828	3.00149	5.92706	4.10769	5.12902	4.32699	3.71749	4.20837	3.61574	5.73223	4.29041	2.40265	3.09641	1.96713	3.17999	5.87116	2.86455	2.95065	3.65799	3.60232	1.793	4.27899	2.63874	2.42619	4.32752	2.87781	5.34724
VCAN	1.1426	1.29169	1.25477	1.75696	1.28684	1.16212	1.24921	1.37618	1.08627	1.10308	2.84015	1.70028	1.18579	1.15467	1.0942	1.09515	1.74892	1.78312	1.18035	1.09751	1.09018	1.12071	1.21111	1.10485	1.65733	1.36624	3.56598	1.09396	1.13585	1.14236	1.18271	1.8818	1.1329	1.11597	1.24365	1.16236	1.18804	1.67153	1.13432	1.16496	1.08474	1.08071	1.10118	1.16047	1.38671	1.08521	1.22519	1.18035	1.19064
CLEC16A	2.42756	4.06254	4.12929	3.32288	3.0024	3.07605	2.55795	3.5929	3.60499	3.51034	4.42442	3.31428	3.87718	2.99139	3.66577	3.15752	3.24691	2.67563	3.33381	2.72517	2.60609	2.80657	3.2766	2.78145	3.6598	3.63647	4.72979	2.57578	3.02565	2.99178	4.33488	3.02736	4.84801	3.12411	2.4833	3.73314	3.74415	2.99891	3.29133	4.03742	3.61197	3.59406	1.88264	2.74866	3.92493	4.13185	2.91766	3.45018	3.76314
MSR1	1.47051	2.00839	1.24009	1.6244	1.2226	1.4013	1.11223	1.91607	1.19373	1.12492	2.04792	1.18356	1.09556	1.37503	1.45099	1.09442	1.73957	1.9286	1.25579	1.08311	1.28214	1.13289	1.94129	1.08824	1.46921	1.49915	3.33327	1.0788	1.08563	1.13923	1.11191	3.28487	1.07929	1.07051	1.14859	1.07075	1.46352	1.7826	1.50573	1.2466	1.28157	1.30508	1.28954	3.3279	1.22854	1.43269	1.44278	1.44123	1.29784
CDH1	52.9376	22.4708	40.0926	91.5117	7.60267	13.9785	-7.13041	21.4721	19.4774	-3.8612	-10.2332	1.67241	8.28267	40.7551	-5.61793	10.1074	23.2706	84.7324	83.9823	33.4359	2.61568	96.3062	95.2843	55.8207	82.9691	7.17583	50.9294	56.2544	9.90077	58.0484	137.896	6.01073	44.7916	16.3208	78.1057	-10.2124	167.143	84.0922	63.2983	6.26655	26.4981	17.109	6.0264	45.2291	21.0557	28.4304	25.863	-4.25558	67.3285
DNAH5	1.24182	1.24771	1.24507	1.30309	1.26312	1.30025	1.2333	1.24547	1.24892	1.2684	1.26272	1.23553	1.23513	1.25055	1.33494	1.24466	1.26191	1.27387	1.26454	1.24527	1.29213	1.22985	1.23391	1.23614	1.24487	1.25034	1.24811	1.28199	1.32723	1.24304	1.25744	1.2759	1.24365	1.24872	1.2331	1.23837	1.26353	1.26211	1.42785	1.29294	1.3039	1.30065	1.26454	1.25643	1.23533	1.22985	1.26819	1.22985	1.37551
ZFYVE16	2.82281	6.45303	3.69446	4.53763	4.05044	4.47453	2.94455	3.99578	2.78033	2.48291	4.08609	2.66281	3.12103	2.8844	3.45107	2.51935	4.56977	4.24411	7.08009	3.5195	4.26456	2.63894	4.12364	2.70004	5.02075	3.36299	3.6215	3.29241	7.34393	3.58156	2.60059	3.84906	4.47867	3.09636	2.81963	2.43015	2.94853	3.02937	3.27531	2.68668	4.93427	5.30862	2.53821	4.58131	2.73593	2.59494	4.24466	4.35009	4.35057
C6	0.938779	0.938779	0.938779	0.960136	0.938779	0.938779	0.951201	0.961552	0.938779	0.938779	0.958719	0.949131	0.938779	0.938779	0.943029	0.938779	0.938779	0.977025	0.956322	0.938779	0.938779	0.938779	0.938779	0.938779	0.943356	0.938779	0.95131	0.938779	0.938779	0.950874	0.938779	0.947605	0.938779	0.938779	0.938779	0.962097	0.944881	0.955559	0.938779	0.938779	0.938779	0.943247	0.938779	0.938779	0.948695	0.938779	0.946189	0.938779	0.943247
RAI14	7.87343	12.2816	6.32106	10.4749	9.26782	6.54717	4.32543	10.017	6.01789	5.25797	6.44629	3.97579	7.12522	6.52759	6.92401	3.64704	8.55282	11.2939	7.64632	9.66909	8.74463	6.91322	9.60166	6.03547	10.1123	10.3728	12.8616	11.2509	8.35839	12.6386	6.8666	8.83326	8.59975	4.62004	6.78791	3.87468	6.54655	9.65907	6.60681	4.50876	8.59582	11.5305	4.77617	9.60227	6.69706	6.01736	8.57563	5.46828	19.1656
SOX30	1.15501	1.26717	1.23239	1.2737	1.17532	1.28958	1.17777	1.24966	1.20905	1.13855	1.16703	1.19959	1.15139	1.14497	1.18582	1.13844	1.25013	1.17368	1.19037	1.1703	1.14229	1.20333	1.23367	1.21698	1.34607	1.17835	1.14742	1.25573	1.20811	1.1284	1.15256	1.34011	1.15361	1.14801	1.1403	1.14555	1.19539	1.21605	1.34116	1.28328	1.22002	1.12245	1.14345	1.13143	1.13727	1.2129	1.26507	1.19469	1.14252
PNKP	11.2288	11.1849	8.77059	11.7748	8.1789	8.20911	5.64811	9.61733	10.3277	10.205	8.03894	9.48787	4.92797	13.062	3.34209	6.38934	9.75899	8.28558	5.34833	4.92735	4.60471	15.1633	9.89193	12.6864	5.64023	3.4948	10.4458	12.0362	6.41923	4.92349	17.1682	11.5873	4.03365	5.13174	14.2129	9.07662	18.5268	11.704	10.5701	11.0313	7.48248	6.92641	6.95522	7.23051	23.3875	8.48502	10.9066	4.47934	6.98658
BEST2	0.891925	0.89086	0.884929	1.08324	0.884929	0.884929	0.884929	0.928652	0.884929	0.884929	0.936028	0.884929	0.884929	0.884929	0.901278	0.884929	0.884929	0.884929	0.884929	0.884929	0.884929	0.884929	0.884929	0.892305	0.896563	0.884929	0.884929	0.884929	0.884929	0.884929	0.884929	0.884929	0.890252	0.884929	0.884929	0.884929	0.884929	2.91175	0.895119	0.884929	0.884929	0.884929	0.884929	0.884929	1.24155	0.884929	0.884929	0.8901	0.90219
PHLPP2	1.04098	1.21344	1.21903	1.32556	1.33524	1.2262	1.06985	1.18653	1.18876	1.09611	1.19919	1.13643	1.10365	1.19482	1.08847	1.04554	1.26298	1.36719	1.46282	1.11101	1.08689	1.07851	1.22173	1.09918	1.27471	1.26587	1.29101	1.07553	1.39121	1.36923	1.07422	1.15114	1.22015	1.05085	1.15096	1.02477	1.18494	1.25115	1.48126	1.1706	1.49001	1.38395	1.14351	1.46292	1.22182	1.24426	1.13438	1.17759	1.53062
SPDL1	2.16532	2.95032	2.44342	2.76406	3.50426	2.90241	1.97446	2.9949	1.93459	1.62574	2.25309	1.76913	2.11045	1.74769	4.16451	1.43509	3.48143	3.1145	2.35768	2.74134	2.90616	1.89848	2.7512	1.8316	3.08106	2.71948	2.23777	2.64521	4.29751	2.40034	1.58394	3.13775	2.07455	1.85229	1.98035	1.49767	1.75852	2.20165	2.34429	1.67182	2.24923	3.94879	1.65542	3.2297	1.54418	1.8584	3.87924	2.16671	2.76556
STAU2	3.44828	6.95946	2.35443	6.94975	2.98597	2.92798	2.52366	4.57549	2.2275	1.86309	2.4678	2.37053	2.63427	2.84207	3.28205	1.95469	6.50504	6.41968	5.39392	3.78026	2.42244	2.99204	4.58646	3.19235	4.35814	3.51336	3.79706	4.64278	3.78688	2.75623	2.49139	5.92202	3.44102	2.03823	2.31507	1.78941	2.50512	3.06825	2.7317	2.68184	3.53719	3.69521	2.02743	3.86767	2.24683	2.46883	7.96502	3.36631	3.13239
CTNS	13.2332	7.68313	13.0191	7.69284	6.99028	5.243	5.71892	12.6866	13.5031	9.69902	9.99171	18.9163	7.64208	5.88824	8.31667	7.19544	9.36467	10.1801	3.06996	6.94816	6.55862	12.9844	9.62724	6.36454	10.318	4.92562	8.9778	10.0147	5.68085	5.72244	9.27691	9.66179	7.25904	8.80428	7.1589	9.17914	14.5387	8.77837	11.4356	11.4658	7.66792	7.24589	3.25953	8.18122	9.60362	17.3303	12.5806	4.67826	7.18161
RTN4R	3.7129	2.95893	2.11066	4.41044	2.01588	1.81344	3.00129	3.3679	4.76612	2.4786	3.73341	2.49259	3.44648	4.94569	2.95028	3.77922	2.81527	2.75232	1.68086	2.92749	2.09439	4.2913	3.01936	3.4879	2.82439	2.31506	3.16899	3.40853	1.17335	3.07988	4.95803	3.35336	3.82897	2.49747	4.15691	2.09353	3.04215	2.54941	2.73975	5.99428	2.52741	1.7446	3.3198	2.05117	3.15108	3.79007	3.87455	2.40756	2.55287
PHF23	18.9602	10.4951	24.0403	17.3995	16.8212	14.9914	18.9828	24.7652	25.3196	21.4104	31.6944	43.7466	20.47	13.4064	13.7592	21.9765	23.9775	20.0061	15.0084	12.6695	15.3746	24.5255	18.7083	16.0145	21.82	18.9245	23.0351	21.3622	12.5256	13.2462	18.0368	26.7927	19.2041	27.3268	17.4897	21.3248	27.9404	15.4596	19.8693	30.7762	12.9902	15.624	4.18443	15.9054	16.764	26.9218	28.649	28.4159	16.7589
CDH10	1.22906	1.26287	1.24026	1.24206	1.22906	1.24206	1.24406	1.27067	1.22906	1.22906	1.99407	1.22906	1.24086	1.22906	1.28087	1.22906	1.25747	1.22906	1.24606	1.22906	1.24526	1.22906	1.22906	1.22906	1.28447	1.24206	1.22906	1.22906	1.22906	1.23886	1.22906	1.22906	1.25967	1.22906	1.22906	1.24806	1.22906	1.25967	1.23866	1.3779	1.22906	1.25066	1.22906	1.25847	1.22906	1.25006	1.25587	1.29788	1.30588
INPP4A	2.40254	4.42078	2.82807	3.44999	3.02048	2.89507	2.05554	3.06673	2.403	1.97178	2.7443	2.49823	2.05406	2.8322	2.6596	1.82016	3.69692	3.4319	2.87518	2.50619	3.06096	2.63808	2.98133	2.07613	2.55938	2.47686	5.46316	2.79812	3.08436	2.75304	2.32095	3.84253	2.29568	2.02185	2.33203	1.72742	2.68066	2.80779	3.14878	2.35917	3.49726	3.22412	2.00586	4.26916	1.80947	2.90567	3.26951	2.27057	3.52783
RAB27B	1.20585	1.21128	1.19814	1.23576	1.20539	1.20562	1.19814	1.29445	1.19814	1.19814	1.31077	1.20539	1.20494	1.21944	1.22216	1.19814	1.22556	1.21423	1.22284	1.19814	1.20766	1.19814	1.20856	1.21446	1.2174	1.19814	1.25117	1.22964	1.23508	1.20947	1.19814	1.21695	1.20992	1.19814	1.19814	1.29672	1.19814	1.23349	1.19814	1.19814	1.19814	1.19814	1.21808	1.23213	1.19814	1.21038	1.20856	1.19814	1.19814
PSMA4	8.77289	13.399	6.42435	13.4641	9.48302	7.64069	6.13294	15.4746	4.84777	4.63149	7.51719	5.09275	6.22043	5.90282	10.4689	5.16111	14.8702	16.0704	6.88732	13.1624	9.34769	8.9233	14.7827	7.3891	12.9228	7.90356	16.397	8.94476	7.46019	7.40543	5.39761	22.5978	7.45109	5.69478	7.64536	3.41934	6.33476	8.68539	8.56944	6.56247	7.4472	10.9356	4.41007	10.6053	4.26892	5.81633	17.3956	9.43317	8.79163
MYO16	0.942169	0.950613	0.989562	0.958296	0.980053	0.958296	0.991692	0.955938	0.978836	0.966969	1.01565	0.945364	0.970468	1.05544	0.981422	0.968718	0.95145	0.965675	1.01908	0.945973	0.95822	0.950461	0.974804	0.938594	0.9834	0.954265	0.950005	0.964002	0.957612	0.946049	0.941028	0.946201	0.957992	0.950613	0.959742	0.933421	0.979292	0.964534	0.965599	0.963469	0.982563	0.994202	0.95997	0.962328	1.00014	0.994126	0.933117	0.963165	0.96385
LSG1	6.47574	6.02708	6.81359	5.39217	7.14012	7.5483	5.37009	6.22929	5.3807	4.75962	7.88411	5.73843	6.0072	6.39943	9.28195	5.31138	5.90213	5.50534	4.91397	4.83994	6.67205	4.65345	5.51343	3.68737	4.98784	6.97076	6.55323	5.16788	9.2124	5.43139	3.26307	6.77367	6.83316	6.4311	3.88792	3.91897	6.25837	5.02768	8.05245	7.04456	7.42327	7.8368	3.91064	7.69731	4.29839	6.93461	6.37578	6.82506	9.8624
PARP3	5.35268	3.49097	4.76548	2.67313	7.10912	7.63167	6.77906	3.82679	4.97739	6.8123	4.64432	6.88601	5.98456	5.74278	5.31575	7.47259	4.4004	4.35717	2.82354	2.66914	4.94161	3.49181	3.91432	2.09929	5.5027	5.44358	5.62977	5.13302	6.70735	2.16494	3.75838	4.31564	3.475	4.19832	2.33392	4.54881	4.96464	3.54402	9.05045	4.94453	6.78182	11.792	2.87321	7.48526	8.53842	5.6353	4.05812	6.26772	7.71175
TNC	1.72874	1.47147	1.1418	1.32099	1.17768	1.11533	1.30449	1.53725	1.23264	1.10093	2.68607	1.07874	1.21147	1.72757	1.1994	1.18337	1.63829	1.17963	1.29344	1.06349	1.35322	1.15005	1.26689	1.05679	1.21365	2.38699	2.03592	1.09174	1.20719	1.15916	1.29499	1.60653	1.15425	1.03896	1.33189	1.25755	1.07898	1.72859	1.1843	1.11829	1.04239	1.07493	1.10093	1.06294	1.18555	1.11401	1.28612	1.17566	1.08863
THAP3	4.79925	3.98773	3.0243	2.90046	4.43133	3.2696	5.14091	4.86311	3.804	4.21083	4.57836	6.28594	5.34898	3.37466	2.84774	6.10022	4.15093	4.52472	2.45984	2.53331	2.92732	6.86566	4.45453	2.8553	3.87168	5.16777	6.1927	2.08315	2.94579	3.35277	3.12272	4.50313	3.03666	5.64525	6.17301	5.49578	3.1798	3.56541	5.04325	6.38184	2.65325	4.02725	3.69237	4.29468	4.5222	3.42556	4.33634	5.11062	2.66844
TDP1	3.05849	2.99723	2.63877	2.92658	3.0644	3.29677	2.78725	3.71444	2.65328	2.38259	2.94298	2.85727	3.06851	2.58965	4.94765	2.40727	4.16522	3.665	2.63475	2.64059	2.69018	2.56174	3.36403	2.34325	3.46796	3.33864	3.51054	3.47411	3.06228	2.86783	2.40207	3.77421	2.3561	2.20282	2.46184	2.031	3.79692	2.88053	3.12646	3.41623	2.74278	3.05455	1.7611	3.11621	1.59071	3.19127	4.67112	2.62143	3.25979
AIFM2	10.6263	15.1259	6.78436	17.8251	6.07792	6.97144	5.24683	13.5327	5.84945	4.00557	7.53658	5.75291	4.83781	4.60013	6.06071	5.37861	14.3938	17.413	5.97079	9.608	4.96069	13.0331	12.0301	8.93726	7.48167	5.17971	16.5257	12.0456	5.63611	8.51919	10.0853	18.6812	4.73675	5.59717	8.93527	4.28258	7.85774	9.68265	9.79876	6.44838	6.62186	7.66552	4.53001	4.72323	8.03291	5.27709	13.1098	5.46946	4.34163
C2orf83	1.24475	1.24475	1.24475	1.24475	1.24475	1.24475	1.24475	1.24475	1.24475	1.24475	1.24475	1.24475	1.24475	1.24475	1.24475	1.24475	1.24475	1.25633	1.24475	1.24475	1.24475	1.24475	1.24475	1.24475	1.24475	1.24475	1.24475	1.24475	1.24475	1.24475	1.24475	1.24475	1.24475	1.24475	1.24475	1.24475	1.24475	1.25751	1.24475	1.24475	1.24475	1.24475	1.24475	1.24475	1.24475	1.24475	1.24475	1.24475	1.24475
SPATA7	2.22138	2.41375	2.08641	2.1506	3.34756	2.80818	2.25832	2.05228	2.37875	1.5831	2.27577	1.74007	2.06159	2.15826	3.05959	2.00933	2.11085	2.59322	3.59316	2.85792	2.53427	1.59105	2.32697	1.80184	2.15816	2.62716	2.37545	2.02843	3.14017	3.14608	1.65601	2.32998	2.1125	2.05296	2.11453	1.57107	2.43304	2.35344	2.94576	1.768	4.51428	4.09202	1.90423	3.04321	2.20461	2.03861	2.20926	2.51623	3.35251
MED17	2.46795	2.67721	2.44464	2.62141	2.63266	2.56909	2.36189	2.61633	2.40739	2.35967	2.3974	2.38662	2.38044	2.6417	2.64931	2.34255	2.68276	2.72286	2.6612	2.79515	2.70765	2.36934	2.68022	2.41341	2.65612	2.57686	2.53897	2.49284	2.83257	2.62933	2.41024	2.74601	2.5461	2.41785	2.46161	2.33605	2.38123	2.54309	2.53929	2.49395	2.44861	2.79991	2.42071	2.78961	2.36094	2.50457	2.56148	2.4884	2.88916
RETSAT	19.4467	24.2974	22.5225	21.8994	11.455	16.4298	13.0085	33.959	15.108	13.9833	27.6957	24.8729	17.6319	12.2348	18.0252	12.4176	15.2526	27.4647	11.7272	13.0809	10.8039	27.0874	19.3603	13.2432	21.4375	13.9372	28.8112	18.5101	12.2888	14.2748	19.8258	23.4734	21.509	18.5263	15.4676	14.4867	20.8106	16.4945	12.7885	28.8274	14.66	15.0196	5.41733	15.778	11.9158	20.0554	33.5567	27.7682	13.1458
CAPG	1.13291	4.59482	3.24976	2.33829	1.39757	1.59186	2.71001	2.03993	2.93233	2.11674	18.3595	8.94247	2.23047	16.1019	3.42245	3.38622	5.69299	34.1648	3.85199	0.244265	6.69153	3.51067	9.73799	0.794422	1.68054	4.22455	58.1883	2.88255	0.145017	0.580532	6.15722	1.82933	1.0489	1.85093	4.3637	2.80283	31.1661	14.6782	4.88246	7.91682	0.0694313	0.164621	19.8227	32.6497	23.2875	24.1775	3.351	5.47627	1.16002
AP2S1	52.2781	38.3376	33.7675	44.1491	29.3371	23.6453	46.9454	50.1616	41.2481	40.6987	58.1992	41.5077	31.4872	54.5015	26.4384	57.7723	61.6733	47.4708	30.241	32.6858	46.7735	99.6491	40.3666	100.464	26.2475	19.4745	48.342	62.8326	15.9504	37.2597	73.1739	45.2458	36.286	46.4915	60.9679	56.3703	54.2516	54.0785	49.3069	40.8489	22.349	20.9826	44.9232	17.0811	60.4072	35.5402	64.7452	34.6197	23.0921
USH2A	1.02943	1.0753	1.03953	1.06331	1.06373	1.03174	1.03532	1.13801	1.03216	1.02943	1.05173	1.03406	1.04458	1.05089	1.08098	1.02943	1.05699	1.04437	1.04121	1.06162	1.045	1.03174	1.04731	1.03216	1.05573	1.06331	1.03069	1.03195	1.03869	1.03974	1.0269	1.0389	1.0591	1.0309	1.03785	1.0269	1.04353	1.04016	1.03406	1.03511	1.03069	1.06731	1.03974	1.06247	1.03595	1.09382	1.04353	1.03616	1.06983
ZPBP	1.04873	1.05655	1.07229	1.04873	1.09184	1.04873	1.10136	1.09715	1.05866	1.04873	1.1166	1.05755	1.04873	1.10016	1.04873	1.04873	1.05535	1.04873	1.09044	1.04873	1.06006	1.04873	1.04873	1.05856	1.04873	1.04873	1.05585	1.04873	1.04873	1.04873	1.05735	1.04873	1.06297	1.04873	1.04873	1.04873	1.04873	1.04873	1.04873	1.04873	1.04873	1.04873	1.04873	1.04873	1.04873	1.07821	1.05495	1.06247	1.09475
TG	1.09251	1.22931	1.56386	1.27068	1.16267	1.55757	1.15118	1.19218	1.21153	1.15783	1.16859	1.18456	1.164	1.14162	1.09167	1.24552	1.18117	1.13666	1.17936	1.1415	1.09227	1.17125	1.12807	1.09324	1.16073	1.13376	1.10763	1.20101	1.18553	1.12602	1.12578	1.2743	1.15626	1.21637	1.16629	1.37627	1.11199	1.16448	1.12928	1.11767	1.11308	1.21286	1.093	1.09977	1.09856	1.10025	1.17912	1.18492	1.12505
ADAM28	1.16612	1.40012	1.18472	1.18735	1.20737	1.18177	1.13735	1.26939	1.14818	1.1402	1.33908	1.16612	1.13254	1.22148	1.15026	1.12871	1.24719	1.66464	1.188	1.18396	1.174	1.12324	1.36446	1.13888	1.18603	1.20715	2.42703	1.14392	1.18571	1.15048	1.15431	1.43415	1.1344	1.12816	1.17105	1.14315	1.30681	1.38634	1.21218	1.1787	1.12324	1.23111	1.16623	1.83147	1.19282	1.18724	1.23789	1.18866	1.36905
BARX2	1.05081	1.04077	1.04077	1.05545	1.0454	1.04077	1.04077	1.04077	1.04077	1.04077	1.04989	1.04077	1.04077	1.04077	1.05638	1.04077	1.04077	1.04077	1.04401	1.04077	1.04077	1.04077	1.05105	1.04077	1.04077	1.04077	1.04842	1.04587	1.04077	1.04077	1.04077	1.04486	1.05614	1.04077	1.04077	1.04077	1.04641	1.05228	1.0444	1.04077	1.04077	1.04077	1.04077	1.04077	1.04077	1.05669	1.04077	1.04077	1.04077
DCUN1D1	2.173	2.7073	2.09416	2.44007	2.85366	2.5308	2.08846	2.32898	1.97166	1.81268	2.21145	1.91392	2.14474	2.15345	3.02267	1.84859	2.69639	2.65241	2.30796	2.24174	2.4856	1.79932	2.31513	1.88077	2.45253	2.59645	2.6735	1.93021	3.27956	2.17887	1.71844	2.53194	2.13635	2.0795	1.9939	1.77839	1.99496	2.08056	2.28841	1.95456	2.61665	3.32419	1.89917	3.11251	1.81007	2.03894	2.6801	2.34877	3.82469
JADE2	7.5277	9.13172	7.31486	5.67729	5.06274	5.90871	5.0827	8.85631	6.29115	7.41092	6.03808	7.52632	9.15997	4.83363	7.59012	8.20882	7.49192	6.50683	10.3194	4.98857	4.06176	8.27423	10.4374	5.21553	11.4659	8.20659	8.79995	6.94325	5.5923	5.69288	5.50876	7.28346	9.89806	7.8802	4.38953	4.06129	8.52377	7.35295	11.8051	7.9182	9.62695	5.79223	3.34893	8.95912	6.71244	4.38454	6.00169	11.8769	5.2355
ZIC2	1.12326	1.17897	1.12326	1.42685	1.12326	1.12326	1.12326	1.35843	1.15328	1.12326	2.15397	1.12326	1.12326	1.12326	1.21115	1.12326	1.1501	1.13649	1.15951	1.17846	1.12326	1.15125	1.12975	1.12326	1.12326	1.12326	1.18088	1.13293	1.12326	1.13713	1.13191	1.16142	1.13051	1.12326	1.12326	1.12326	1.13382	1.79404	1.13013	1.1356	1.12326	1.12326	1.13535	1.15442	1.39747	1.18291	1.19932	1.12326	1.1543
LCP2	1.48559	2.04563	1.30354	1.5603	1.3303	1.39873	1.16889	3.55358	1.33007	1.18443	2.19967	1.34223	1.1539	1.75412	1.53275	1.12832	1.60032	2.00498	1.26643	1.10541	1.4291	1.41293	3.01496	1.14166	1.25536	1.42713	7.11436	1.1153	1.16057	1.1984	1.5049	4.18847	1.20075	1.13052	1.37911	1.12087	1.58462	1.56587	1.81995	1.47351	1.16567	1.23229	1.32167	2.29124	1.45758	1.39794	1.83274	1.26941	1.26235
TRIT1	6.11426	8.16116	4.9914	6.25519	7.92839	5.7203	4.54876	7.31799	4.86401	3.94029	5.39545	3.9057	5.785	3.77886	4.80716	4.18651	10.2519	8.56353	4.46861	4.60625	4.56494	5.78604	7.56342	3.71833	4.97122	6.01577	6.06942	4.84055	6.73394	4.46637	2.98182	10.491	4.19444	5.17341	5.54663	3.63081	5.11063	6.00416	7.2999	4.85696	6.36617	9.56011	3.80961	6.94053	3.61671	4.21726	8.33628	5.74048	3.67645
ADRB1	1.09113	1.11466	1.08386	1.13365	1.13111	1.09095	1.09213	1.15964	1.10712	1.10548	1.1769	1.09767	1.08386	1.09394	1.08386	1.08386	1.08386	1.08895	1.08849	1.08922	1.08386	1.08386	1.10866	1.09158	1.09594	1.11239	1.24541	1.09131	1.08386	1.08386	1.08386	1.10158	1.10058	1.08386	1.09185	1.08386	1.08386	1.35718	1.0944	1.08867	1.09476	1.10167	1.10258	1.08386	1.16336	1.10694	1.08876	1.08922	1.10185
GUCA2B	0	0	0	0	0	0	0	0	0	0	0	0	0	0	0	0	0	0	0	0	0	0	0	0	0	0	0	0	0	0	0	0	0	0	0	0	0	0	0	0	0	0	0	0	0	0	0	0	0
CUL7	11.5886	7.90244	8.12886	4.52899	6.45202	6.65477	7.92436	12.0472	7.74019	26.6665	11.4845	28.4873	19.1209	11.0623	18.0729	15.3456	13.9046	7.23325	5.15838	4.32693	7.14223	22.4817	6.86048	7.83547	8.84539	19.2209	9.69937	7.2557	7.92847	5.44302	11.3707	6.21891	19.8547	12.5317	6.83073	35.2288	4.43736	6.74404	7.09938	12.8812	3.87235	6.36359	4.2582	18.6223	18.3609	18.7909	15.7708	18.2512	17.249
CTNNA1	25.9706	37.5883	27.8861	32.8283	24.7158	24.2943	16.2532	29.5184	19.8528	20.0948	30.8123	25.8887	29.5286	26.4015	32.554	18.5724	28.193	33.4818	30.0548	22.4524	12.341	26.0311	32.6322	27.2726	64.5083	38.6582	31.7727	26.0007	35.4616	39.1886	29.3481	31.3114	37.6493	19.475	15.665	8.11408	25.6314	28.1998	20.3992	36.0451	21.7909	29.0019	3.95247	31.3668	14.7034	24.8463	24.5247	33.1627	28.3385
PHKA2	2.21562	3.64719	2.75993	2.87878	3.68975	3.15409	3.27845	2.10526	2.72446	3.06347	2.72233	3.96246	4.81	3.1817	3.03044	3.13513	3.00794	2.89263	3.40745	2.40904	2.03659	2.24582	2.74483	2.19029	2.55385	4.88928	1.91625	2.61693	4.35874	2.38025	2.82545	2.33195	4.34875	2.76418	2.27815	2.91536	1.99561	2.65587	3	3.26319	3.95695	5.19188	1.66714	3.97056	2.28185	2.6775	2.42288	3.41507	4.93215
CNTLN	1.58133	2.23664	1.81716	2.32005	2.45335	1.80818	1.45635	1.83808	1.59356	1.47594	1.67144	1.58773	1.46619	1.66542	2.31623	1.3608	1.67956	2.39382	1.64163	2.49893	1.77273	1.39328	2.2653	1.66437	1.60274	1.59328	1.75285	1.95666	2.28852	2.09589	1.52878	2.31031	1.66752	1.52333	1.6917	1.33891	1.54378	2.00024	1.85825	1.44307	1.91242	2.75931	1.58525	2.71717	1.59385	1.63274	1.91061	1.5927	3.03718
EPHA3	1.1525	1.14956	1.13954	1.12873	1.12269	1.14018	1.1339	1.16928	1.1203	1.1172	1.13064	1.13947	1.12507	1.12126	1.26834	1.12007	1.14654	1.11927	1.12666	1.13446	1.13875	1.12301	1.11919	1.1172	1.15394	1.16912	1.17127	1.1172	1.12285	1.1215	1.1172	1.16968	1.1172	1.1172	1.12046	1.1172	1.1304	1.1172	1.12364	1.1172	1.12825	1.12197	1.12102	1.1172	1.1172	1.12651	1.14694	1.13676	1.41305
HSPA5	90.7219	107.788	44.8641	88.4654	32.8832	26.2833	22.1016	185.78	17.0294	30.7083	85.8301	30.6992	40.8963	19.7476	81.5826	19.9624	140.849	106.115	53.3442	42.3831	48.5765	98.4541	99.7903	59.6099	63.5985	40.6721	123.829	57.7805	42.5963	65.0959	34.6396	164.612	44.9223	39.0682	35.8628	3.11804	36.5525	64.6031	34.9566	53.7088	36.1609	20.333	-3.09764	20.2879	19.0954	89.1678	163.648	45.2795	69.9395
DSG2	2.78165	5.15409	2.21217	6.3041	4.6399	8.43771	4.16815	5.81374	2.65565	1.92801	4.79105	3.36156	2.27182	1.50081	8.34107	1.45409	3.34256	3.49285	2.2895	3.19662	2.07504	3.42167	3.56153	3.47634	8.83097	3.87707	1.5603	2.82915	15.2507	1.67914	1.74354	4.27686	3.0549	2.57918	1.93557	2.04132	1.52285	2.87283	3.98858	2.62785	3.84366	3.95556	1.73287	2.08843	1.60796	1.70701	8.36358	2.71195	3.67889
GEMIN8	7.79172	9.16143	4.93468	8.775	6.44602	4.81344	9.72699	8.89578	4.67724	5.31459	7.43145	6.26941	9.5444	11.6945	6.11182	7.57869	8.87523	10.9451	7.50001	8.91028	8.50875	8.54441	8.08145	16.763	6.03222	6.49257	7.32018	8.61365	7.88666	14.0794	7.77309	9.93965	6.84196	7.54004	8.26565	3.99212	7.33513	7.34226	6.72877	12.425	5.11666	7.85123	3.57778	9.71511	7.09157	4.76359	7.05262	5.97639	12.6475
OFD1	2.99538	5.54864	2.93534	3.6709	5.1108	3.93658	3.40537	3.78414	2.4752	2.18094	2.83143	2.08355	3.46067	3.5125	4.94644	2.38223	3.6684	5.27491	5.91517	4.60776	4.32903	2.46071	4.30215	2.90564	2.86499	3.54558	4.18875	3.08617	6.02842	6.96608	2.23229	5.20239	3.08778	2.48976	3.25253	2.24154	2.19623	3.22919	3.35137	2.45934	2.90934	6.8237	2.58087	6.62265	3.43532	2.7672	4.22239	3.11466	7.62019
GPM6B	47.3754	63.4031	7.1447	80.0049	20.1028	13.7824	1.7833	53.5051	3.16109	2.58004	7.37142	7.55737	13.4264	18.098	28.3205	0.579983	68.5403	73.3511	13.6374	33.8919	23.2563	14.1883	40.5388	47.7405	32.5153	21.8774	56.564	44.2009	13.25	31.9973	12.4533	75.0441	21.339	9.3501	22.9954	1.59218	17.3518	49.524	15.4576	8.39411	38.7044	17.6895	5.39516	60.3015	3.31715	27.494	65.1528	21.5111	44.4492
MAGEC2	0.996757	0.996757	0.996757	0.996757	0.996757	0.996757	0.996757	0.996757	0.996757	0.996757	0.996757	0.996757	0.996757	0.996757	0.996757	0.996757	0.996757	0.996757	0.996757	0.996757	0.996757	0.996757	0.996757	1.02637	0.996757	0.996757	0.996757	1.02545	0.996757	0.996757	0.996757	0.996757	0.996757	0.996757	0.996757	0.996757	0.996757	0.996757	0.996757	0.996757	0.996757	0.996757	0.996757	0.996757	0.996757	0.996757	0.996757	0.996757	0.996757
PREX2	1.17715	1.33014	1.14341	1.26611	1.17255	1.20591	1.12769	1.22521	1.14852	1.12322	1.21844	1.13741	1.1291	1.17345	1.21498	1.12322	1.28681	1.33742	1.15594	1.12258	1.1507	1.14622	1.13766	1.16182	1.19428	1.20859	1.33103	1.19965	1.16706	1.1452	1.14622	1.20246	1.13868	1.12117	1.16655	1.11683	1.12462	1.18776	1.15402	1.14852	1.13229	1.159	1.15274	1.2123	1.14111	1.14571	1.22189	1.17562	1.42165
WDR37	3.10209	7.24079	4.01872	5.27827	5.07511	4.4665	2.71847	5.09206	3.24736	3.17859	3.58674	5.48747	4.02739	2.9667	5.28041	3.2052	4.87587	4.97147	4.25346	3.22643	3.51491	3.44783	4.66712	2.44188	5.69975	5.6562	5.27336	3.87253	5.01647	3.50111	3.22267	5.17224	4.41613	4.44412	2.77727	2.50819	2.72599	4.52814	5.10317	3.7409	5.85575	7.49906	2.1856	6.48721	2.59658	4.11892	5.16212	5.81275	7.03434
YTHDC2	3.46496	5.68994	3.01763	4.57745	4.21075	4.19924	2.64815	4.3989	2.68029	2.61387	3.05755	2.58618	3.09016	2.94955	3.98157	2.34319	5.03327	5.34498	3.68644	4.00283	3.61732	2.67267	4.06894	2.71195	4.49682	3.71612	4.36017	3.39806	4.96724	3.87071	2.68735	5.00446	3.09985	2.49611	2.97883	2.22566	2.71441	3.60034	3.52654	2.68601	4.31486	5.63883	2.60641	4.18686	2.49031	2.64768	4.58221	3.07437	3.99268
CTPS2	4.24003	6.07621	4.26762	5.26059	5.26177	4.5193	4.48527	5.28935	3.8345	3.60144	4.14519	4.05742	5.40808	5.82155	6.52544	3.84291	5.11294	7.09567	5.14304	5.06564	5.06367	4.52519	5.46842	4.97009	4.12021	6.33269	5.30491	5.05739	4.74764	6.7005	4.05719	5.34899	5.36266	3.85171	4.18205	3.17218	3.67028	5.63367	4.88955	6.07205	4.44284	5.80732	3.12205	8.38503	3.55988	5.38057	5.6827	4.21505	8.17217
ATP6V1H	13.4463	42.2631	6.20271	34.9703	8.40253	9.74509	7.46972	36.3192	4.07077	2.3282	9.34036	10.5673	6.91075	5.85041	14.8242	2.85878	29.5341	29.1577	13.1408	9.86212	6.77074	17.6331	19.6709	12.5628	23.088	10.6737	21.6821	23.3785	10.6054	7.49285	6.66604	39.0616	12.0816	5.76633	5.38952	1.29304	12.4051	11.1688	10.0142	6.9491	11.7329	10.4368	2.97003	15.113	4.10684	9.21359	38.6677	9.74775	9.4984
POLR2B	10.3336	24.1361	7.09045	13.9879	8.42057	8.3656	5.04204	15.1485	4.37645	5.144	7.24335	5.981	7.1717	5.95199	18.2067	4.57961	15.1083	8.05195	9.10102	7.21556	6.57563	6.17053	12.3376	6.83719	10.5065	12.1054	13.2651	6.08197	12.4698	9.07795	5.59578	13.5292	9.24265	5.69667	5.27741	2.78598	6.38267	10.3095	7.40204	6.48045	9.98645	10.7801	2.64275	11.5969	3.44457	7.42055	14.052	7.90567	15.6804
FAM214A	2.19098	4.06749	2.35141	3.46718	3.32449	2.91652	2.18089	2.72427	2.15333	2.03502	2.3474	2.08131	2.34468	2.23227	3.0473	1.95135	3.17753	3.2521	2.73536	2.979	3.15552	2.21717	2.91443	2.14824	3.27447	2.75401	3.99937	2.38269	3.73564	2.32976	2.12323	3.40752	2.58795	1.93407	2.23918	1.96617	2.02519	2.6135	2.57203	2.0643	2.95545	4.26347	2.2089	3.65088	2.1778	2.3535	2.97663	2.41352	4.38961
TPR	4.66898	10.0783	3.20096	9.57206	6.18618	4.84315	2.13526	6.78969	2.67632	3.62449	4.38686	2.12827	2.23236	3.84101	3.7527	1.66412	6.93535	8.38318	3.40734	4.82893	2.93699	3.18171	7.59575	3.36751	4.72876	2.76934	5.34344	5.9424	9.90006	3.02325	2.99183	8.11387	2.47174	1.84026	3.98493	1.76264	4.44225	5.27847	3.2928	2.27612	3.48873	8.84913	2.12041	13.9449	3.06505	4.17207	8.17287	2.01396	11.2838
CP	1.09939	2.09183	1.91821	8.12526	1.25845	1.0479	1.16839	7.1168	1.0568	1.18016	22.1478	1.226	1.05177	1.89699	1.01762	1.01924	1.12355	1.59708	2.47653	1.02118	1.85719	1.02993	1.03504	1.01421	2.39569	2.37223	1.37453	1.01142	1.32233	1.02908	1.01142	1.06757	1.17458	1.03651	2.52168	1.0266	1.03829	15.4558	1.34812	1.07461	1.21315	1.0527	2.05922	1.71525	2.51115	2.00486	1.01862	1.76202	4.03162
DTNBP1	7.30502	5.19882	10.1242	6.21277	10.2022	9.49266	4.63016	9.71492	10.136	11.0569	9.4488	21.7694	9.17687	8.54208	15.7218	7.63658	8.55425	6.52772	8.71528	6.37029	7.83748	8.38862	8.32471	4.68297	9.69509	10.2233	11.8031	9.76099	6.67536	6.51019	5.56275	8.92315	14.4134	10.5954	7.2366	6.39684	7.24747	7.33801	9.59858	13.7283	6.72404	10.1379	6.45953	13.7972	6.10226	10.5482	8.92751	15.6874	7.37276
XK	1.01888	1.18976	1.00012	1.11081	1.04688	1.02451	1.00979	1.07748	0.993046	1.02509	1.10158	0.990736	1.00156	1.03721	1.16696	0.991458	1.01498	1.09018	1.51146	1.06102	1.02119	0.97818	1.01311	1.02869	0.988283	1.04457	1.06492	0.999107	1.03634	1.06131	1.02783	0.993334	0.997375	0.982077	1.03086	1.0196	0.9942	1.14314	1.26712	0.998241	1.23089	1.06535	1.03259	0.986407	1.03317	1.00373	1.09941	0.986407	1.2791
ANO2	0.902615	0.968922	0.956164	0.992144	0.98611	0.986262	0.896045	1.41137	1.12881	0.893524	1.40496	0.926525	0.894365	0.896427	1.40121	0.940123	1.0243	0.984047	0.980762	0.910789	0.977477	0.973276	0.894135	0.951199	1.07136	0.934164	0.95097	0.960977	0.904295	0.915296	0.971901	0.914379	0.928206	0.913233	0.898719	0.875878	0.902538	1.17892	1.69814	1.13423	1.43269	0.938824	1.10963	0.921865	0.94081	1.4841	0.949977	0.913233	0.942032
C12orf4	3.20853	5.36423	2.95079	4.4003	4.07876	3.51021	2.20978	4.3092	2.44085	2.20656	2.81529	2.3834	2.78272	2.92188	4.28763	2.41651	4.36254	5.32629	4.70386	4.49436	3.73179	2.34393	4.25783	2.68374	4.40567	3.89986	4.16547	2.85163	4.58493	4.63943	2.35745	4.82379	3.11393	2.83856	2.98211	2.09076	2.98784	3.32254	3.59039	2.52301	4.01056	5.18498	2.57975	3.73304	2.2096	2.60328	4.33292	3.2956	4.6933
SCML1	1.59267	4.25259	1.79118	2.39234	3.24541	1.77205	2.10627	2.20281	2.0664	1.66981	1.73397	1.73441	2.47171	2.07815	2.23031	1.79643	2.49957	2.15592	3.53353	3.47071	3.43574	2.02645	2.3959	2.30808	1.8694	2.11632	2.19427	2.02956	2.94216	4.08904	1.76912	3.73383	2.32685	1.73219	2.24721	4.59606	1.71163	2.15601	2.17968	1.64623	2.16535	5.13502	2.0753	3.26739	2.29669	1.7967	2.53302	1.7547	4.12268
WWC3	6.92839	12.6537	9.99194	13.3255	10.3857	6.42353	8.13417	10.7673	8.7717	7.63651	10.882	8.14469	7.54265	10.7788	3.99729	6.28669	9.31243	11.0755	8.46847	11.717	6.76719	11.0622	13.2297	8.80865	7.75294	8.54084	13.6806	13.7754	7.62846	23.9045	12.6439	13.7351	10.3242	5.73212	11.6953	4.22876	9.95111	17.0406	8.67962	8.55909	10.7509	8.88488	5.66501	10.5502	8.66787	5.92656	7.60241	7.92983	16.8342
ARHGAP6	1.22836	1.3125	1.21712	1.29833	1.23431	1.26156	1.21446	1.28488	1.2312	1.19562	1.26321	1.26385	1.21227	1.27336	1.28269	1.19553	1.3029	1.30592	1.24592	1.37798	1.24135	1.23047	1.21748	1.22032	1.25827	1.26668	1.45343	1.23193	1.22635	1.23669	1.2387	1.30701	1.20623	1.18328	1.2162	1.22599	1.21977	1.31378	1.23778	1.21126	1.21519	1.23221	1.21556	1.23861	1.20605	1.20706	1.26257	1.2258	1.28845
FAM184B	1.5443	1.71908	2.11334	1.81219	1.57394	2.14957	1.32537	1.40991	2.1914	1.79572	2.64451	2.91701	1.43868	1.41485	2.54252	1.36644	2.53132	2.1174	1.28914	1.40761	1.68922	1.38411	1.47414	1.60995	2.12026	2.38551	1.68724	1.6823	3.33246	1.26806	1.65672	1.34294	1.52311	1.71875	1.45602	1.45449	1.27948	1.42627	1.29299	2.73454	1.54298	1.55066	1.31264	2.19514	1.32504	2.19623	2.76221	1.39158	2.77209
MAP4	21.7989	13.2359	31.7662	18.8381	15.1747	21.3026	17.8425	12.772	26.4713	35.7695	28.5766	32.5031	29.4552	32.8244	24.3174	22.7949	12.3148	20.3195	7.55772	13.1471	15.5585	14.0579	13.08	16.5246	28.4533	38.5267	13.656	18.4446	21.2369	18.9538	27.5613	10.523	30.136	33.4135	14.3772	50.1366	27.0415	17.7643	15.5232	43.3306	17.81	19.7785	9.65145	22.1009	15.1422	45.254	10.8277	22.1665	33.4815
GOPC	3.08883	5.69239	4.66652	8.17616	6.63656	5.52762	3.12478	4.39979	3.59147	2.2428	3.2959	2.78499	2.7498	4.18797	4.95192	1.95602	5.83658	6.91921	7.7881	7.37213	4.9943	2.45782	7.40395	2.69641	7.92189	4.62789	7.18594	3.44514	8.73495	6.31605	2.68999	4.60196	4.76206	2.84756	3.61534	1.98134	4.00814	3.67286	4.26684	3.27172	5.06192	8.15788	2.69763	8.08727	2.43755	3.58321	4.83619	4.39948	11.2193
ROS1	1.1734	1.1734	1.1734	1.1734	1.1734	1.17974	1.1734	1.1734	1.1734	1.1734	1.17927	1.1734	1.1734	1.1734	1.18842	1.1734	1.18255	1.1734	1.1734	1.1734	1.1734	1.1734	1.1734	1.1734	1.1734	1.1734	1.1734	1.1734	1.1734	1.1734	1.1734	1.17856	1.1734	1.1734	1.1734	1.1734	1.1734	1.1734	1.1734	1.1734	1.1734	1.1734	1.1734	1.1734	1.1734	1.1734	1.1734	1.1734	1.1734
USP28	2.67487	6.15905	2.78038	4.25788	3.88636	3.30626	2.73138	3.82156	2.17237	1.88804	2.6935	2.16984	2.26194	2.76834	2.64557	1.63345	5.23941	4.63746	4.11579	3.46845	2.20174	2.5613	3.6475	2.25542	3.58186	2.60493	3.87854	3.50564	6.61991	2.81719	2.05313	4.0615	3.19132	1.79931	2.58707	1.42196	3.22789	2.82432	3.00613	2.55639	3.09194	4.19347	1.58645	4.24577	1.50716	2.85561	4.59628	2.91979	4.051
HDAC9	1.31971	2.23531	1.24554	2.32324	1.58436	1.26687	1.34661	1.47709	1.22032	1.33631	1.65002	1.22894	1.4253	1.41374	1.42109	1.2406	1.86203	1.40134	2.16807	1.35617	1.31971	1.26203	1.44053	1.41584	1.22978	1.60673	1.45997	1.34724	1.28546	1.53088	1.23503	2.06879	1.40229	1.27044	1.27233	1.45167	1.24701	1.64172	1.29859	1.20961	1.42845	1.4794	1.24323	1.40943	1.49653	1.27832	1.97224	1.66031	1.68028
TSPAN17	9.56625	11.0829	9.12283	7.03068	4.94426	5.58325	4.21031	12.1501	7.45449	4.56343	9.35916	7.71837	4.42779	3.82742	6.89611	3.01653	10.3242	10.5855	4.82411	4.70953	4.62839	12.7452	8.8307	7.587	4.24817	3.83109	11.5982	9.0952	4.47053	4.58778	9.30275	11.963	6.49528	3.86124	6.12117	6.62482	7.1419	7.91768	8.24507	7.48143	6.70886	5.38974	2.86936	5.23662	6.50734	4.64976	12.1981	5.15563	2.4222
NOP16	5.1645	5.35145	5.20052	8.13516	5.03461	3.95744	4.20162	6.4224	4.1954	4.38896	6.41464	3.47101	3.93317	3.89799	5.41006	5.12033	7.88922	7.56762	4.9873	7.47514	7.82747	4.91049	5.7928	5.8905	4.21022	5.6454	4.79958	5.32503	4.77984	6.81635	6.03613	9.35228	4.7889	4.86064	6.37316	4.3567	6.03528	5.43709	4.03694	4.84267	3.28283	3.60235	3.02014	3.76772	3.7572	3.00332	9.15135	3.71158	2.93412
CC2D2A	2.9441	5.3168	2.58239	3.35691	3.09614	2.82953	2.16849	3.31305	2.54944	1.88451	2.35511	2.12589	2.50177	2.76581	3.49594	2.25892	5.26531	4.40489	2.74634	2.7141	3.10883	2.64034	2.70833	3.14349	2.12519	2.32575	2.82049	4.67446	3.16546	2.04683	2.43534	3.36096	2.28244	2.27605	2.71347	2.15455	2.20424	3.56136	3.53683	2.2449	3.97915	3.3076	2.29148	2.69727	1.7493	3.77298	5.37163	1.81877	3.27162
RRM2B	5.51019	20.6618	4.46383	21.0254	5.67544	7.9787	3.34047	15.4146	4.29072	2.91806	3.93959	3.32993	3.99681	4.96791	4.4552	3.05428	23.7378	22.9291	7.79389	5.01788	6.31	6.12023	32.553	6.49321	10.6174	6.2061	12.1668	6.03039	9.49063	4.46093	4.64528	21.2965	4.57339	3.11899	6.68359	2.54936	6.51238	7.35651	6.31344	4.32479	9.61012	8.99824	3.23917	7.93271	3.37271	4.28919	25.0301	5.01337	6.07852
ZNF800	2.96105	4.57853	2.37083	4.17661	3.40747	2.70616	2.15887	3.33034	2.11179	1.90149	2.40794	1.90672	2.10739	2.23326	3.18281	1.72265	4.29309	3.6861	3.28327	3.20705	2.68782	2.61724	3.85207	2.23882	3.22133	3.22947	3.53608	2.51703	4.2642	2.84838	2.03375	3.78399	2.37182	1.90606	2.60612	1.65748	2.87329	2.64896	2.31304	1.89028	2.94843	3.79428	1.86936	3.75734	2.36078	2.00037	3.7223	2.50109	4.1801
TNFRSF17	0.915344	0.915344	0.930881	0.915344	0.93242	0.915344	0.915344	0.934573	0.934958	0.915344	0.982723	0.915344	0.931727	0.966416	1.00149	0.915344	0.915344	0.915344	0.915344	0.915344	0.915344	0.915344	0.965724	0.915344	0.930728	0.915344	14.186	0.915344	0.915344	0.928958	0.915344	1.21424	0.915344	0.915344	1.01641	0.915344	0.915344	0.915344	0.968878	0.976031	0.915344	0.915344	0.915344	1.20062	0.915344	0.915344	0.915344	0.915344	0.915344
SNX29	2.4845	3.04381	4.57817	2.4484	2.87106	3.1398	2.22624	3.14666	2.58561	2.62573	3.54978	3.46986	3.30665	2.90361	2.78413	2.48505	2.94286	2.91953	2.41869	1.73076	1.82809	2.25973	2.64921	1.77434	3.04571	3.64482	3.22721	2.19747	3.25755	2.16335	2.647	2.26012	4.0793	2.47654	1.79546	3.30854	2.93364	2.55401	3.16045	4.18057	3.57689	3.14114	1.7912	3.97843	2.58175	3.19198	2.34051	2.99267	4.17908
LMO3	1.28864	1.19684	1.39533	1.23734	1.64198	1.61846	1.28411	1.20277	1.17969	1.60549	1.76948	1.37826	1.36851	1.4461	2.36572	1.1816	1.22158	1.31172	1.32182	1.21975	1.84769	1.19493	1.15948	1.19493	1.18683	1.96448	1.15251	1.27296	1.70704	1.27157	1.1742	1.17655	1.3618	1.33306	1.19772	1.25885	1.18988	1.23543	1.28951	1.22663	1.31233	1.53241	1.33097	2.26138	1.79108	1.73186	1.22759	1.24867	3.21592
MRPS10	18.5961	14.2725	14.4674	16.3366	20.427	16.2189	8.01652	26.5415	9.64928	8.6499	12.873	12.73	11.6924	10.3923	32.9102	8.98828	22.9819	13.5853	12.3082	12.7886	19.1335	13.4078	12.73	9.08098	15.1905	20.3445	22.0793	13.8032	15.5369	13.0856	6.25375	14.3394	20.5371	10.9559	6.62745	3.17019	11.5017	11.937	13.4414	9.63094	14.4764	12.459	5.87237	29.1933	5.93889	13.6755	24.3282	18.8328	17.8378
GUCA1A	1.27863	1.29219	1.27863	1.29431	1.29346	1.27863	1.27863	1.34516	1.27863	1.27863	1.29325	1.27863	1.27863	1.27863	1.29113	1.27863	1.29007	1.27863	1.2888	1.27863	1.27863	1.27863	1.27863	1.27863	1.27863	1.29431	1.29092	1.27863	1.29388	1.27863	1.27863	1.27863	1.27863	1.27863	1.27863	1.27863	1.27863	1.27863	1.31338	1.27863	1.27863	1.27863	1.27863	1.29622	1.27863	1.30384	1.27863	1.29049	1.29177
RSF1	3.08287	5.22032	3.00882	4.10241	3.82344	3.41584	2.66708	3.98883	2.80716	2.84736	3.13202	2.53905	3.08179	3.2186	4.42217	2.51581	4.37495	4.30642	3.9666	3.72599	3.17163	2.77322	4.29464	2.91547	4.05026	3.84609	3.82829	3.27602	5.93832	4.00329	2.65212	4.06949	3.36812	2.70703	2.89817	2.50068	2.92617	3.47125	2.99069	2.95559	3.30293	4.37053	2.57523	5.00227	2.80582	3.70518	4.11679	3.30385	5.99407
VPS13D	3.57191	5.10763	3.80654	3.55253	3.5411	3.44817	3.08598	4.36602	3.40575	2.93602	3.77636	3.45508	3.88835	2.80021	2.57638	2.7172	4.15077	4.22297	2.6149	2.58949	2.24406	4.19073	4.40009	2.38758	3.4434	4.10248	4.24617	2.62078	4.21527	2.4192	2.71713	3.84355	2.78678	2.77701	3.17573	2.34326	2.82133	4.28508	4.36395	3.58724	4.79913	4.21098	2.41197	3.43816	2.69282	3.08074	3.50305	3.25556	3.28121
CELF2	5.17536	4.50059	3.04405	6.88439	1.92598	1.80397	1.5188	7.21079	1.79805	1.56274	2.46723	1.70289	1.51504	1.88403	4.29875	1.49075	6.34497	11.8273	2.14187	4.25353	1.96625	7.9379	7.50939	4.41277	3.3432	1.73022	7.17867	4.14286	2.09145	3.29199	3.11316	5.26365	1.59071	1.52303	4.28597	1.50242	3.92233	5.3581	2.9206	1.75275	1.57217	1.65511	1.8094	4.43003	1.88083	6.57045	5.05455	1.58775	4.23427
FAM120A	20.7884	29.5384	19.9886	22.304	13.7262	17.134	7.95354	23.2483	7.19368	9.57974	15.653	12.2902	12.1451	5.1785	18.3399	7.10727	25.407	26.8542	17.8375	13.5533	12.135	17.361	20.2196	13.6465	18.9771	19.7672	19.2312	20.5029	22.9249	21.6972	11.7869	23.1276	15.7519	8.97368	12.7224	3.04565	8.18568	20.1767	11.1328	10.3095	18.3367	18.0383	3.2879	14.733	7.10484	9.56027	20.4262	14.0581	14.6386
R3HDM1	3.70671	5.54253	3.18369	4.87692	3.73071	3.62934	2.72089	4.72104	3.07202	2.82685	3.31026	3.13659	3.07363	3.04207	3.91138	2.62588	6.1724	5.46757	5.01323	4.28755	3.61388	3.33023	4.04568	3.45736	3.5675	3.6386	4.44503	3.67531	3.60816	4.28392	3.35728	4.90429	3.78771	2.84488	3.14875	2.4283	3.60575	3.78876	3.44842	2.84843	3.82628	4.55003	2.5696	4.76468	2.83249	3.42008	5.83544	3.06227	4.22056
COL9A2	0.974244	1.09699	0.802744	6.23334	0.718629	0.642575	0.703646	3.8321	0.997212	0.826244	8.91414	1.8414	0.6841	0.965118	0.710491	0.910435	1.35383	3.03537	1.21845	0.678092	0.716423	1.52502	1.21115	1.17487	1.63256	0.711708	1.3396	0.854004	0.648736	0.617097	0.701669	0.898875	0.811794	0.932719	2.25803	1.4384	0.726538	20.7629	0.867921	0.889369	0.697486	0.761295	1.50753	1.25283	7.93746	2.04424	1.21997	0.922604	0.934012
KITLG	1.42472	1.75672	1.30947	1.72651	1.39039	1.52191	1.87581	1.97319	1.32453	1.32874	1.51939	1.3685	1.33061	1.39843	1.4873	1.28879	1.86514	1.62828	4.72062	1.49974	1.38908	1.38	1.61228	1.45596	1.42519	1.63399	1.76748	1.45054	2.09219	1.84625	1.32902	1.79592	1.3321	1.3104	1.35802	1.3859	1.39675	1.44474	1.34286	1.31059	1.37233	1.47888	1.36672	1.46401	1.52884	1.31648	2.07264	1.36569	2.08302
ERCC8	1.69674	2.13917	1.59864	2.03869	1.88464	1.77495	1.57801	2.00985	1.46503	1.4383	1.48338	1.47672	1.57236	1.57929	2.001	1.47243	2.01724	2.07994	2.08925	1.97819	1.80853	1.5092	1.87205	1.66133	2.43092	1.68451	1.69264	1.74073	1.91905	2.19237	1.56195	1.89998	1.75798	1.60366	1.61771	1.33828	1.86	1.77522	1.6147	1.55538	1.7202	2.13497	1.42278	1.88045	1.38847	1.51851	2.01432	1.66882	1.86794
ADAMTS6	1.17579	1.21237	1.17775	1.23	1.19931	1.23732	1.18102	1.2108	1.17227	1.17566	1.21577	1.1754	1.17828	1.17867	1.29845	1.172	1.22125	1.22034	1.22073	1.18193	1.17736	1.172	1.22413	1.17227	1.21159	1.17932	1.23941	1.1835	1.20035	1.17932	1.17174	1.27664	1.18533	1.17423	1.1805	1.17893	1.17253	1.19395	1.20074	1.16835	1.22948	1.46762	1.18272	1.20532	1.17514	1.16835	1.24581	1.17109	1.17749
H6PD	8.59118	12.0077	8.46523	6.26743	8.22716	8.43214	7.22597	8.87671	7.54016	11.0303	8.14959	11.3318	10.1518	4.93975	5.77181	9.2032	11.9279	7.87124	3.96715	4.48555	2.23991	10.2266	10.5472	3.94758	8.6942	11.2992	7.26862	3.40404	11.3802	6.24848	7.1442	10.0218	7.17607	5.42116	6.82435	10.6122	4.76359	7.4013	9.50539	7.92543	8.57475	10.0534	3.57164	11.0219	4.58849	7.64464	6.91385	7.20564	6.98508
VAMP3	20.6403	21.3723	49.6649	15.565	40.1544	32.7196	27.7431	16.3127	46.6563	23.1562	36.3678	39.0759	29.4165	30.049	13.3268	31.7853	19.9688	29.6754	7.34672	7.51237	5.69594	23.9772	30.1103	12.5034	21.8888	39.7456	26.0097	4.79997	31.3056	14.1628	11.0106	19.825	12.5994	27.622	19.3347	16.7035	23.4912	28.3422	46.9154	49.7414	48.1532	40.7142	19.7382	35.7099	6.83235	24.492	21.6088	41.3761	20.3292
PER3	2.34952	3.81152	2.51876	2.2056	4.81462	2.68405	2.84308	2.2689	3.17436	2.86049	3.55691	3.17958	3.87023	2.82908	2.57621	2.3333	2.12553	2.13028	2.19136	1.92425	2.42564	2.07553	2.87473	1.81293	2.61054	3.16771	2.46393	1.69978	2.81578	2.57399	1.9733	2.59504	2.17261	2.79094	1.79821	1.76783	1.94237	2.66253	3.98401	2.48862	4.60613	5.53984	2.66292	4.8287	2.0097	2.12292	2.11873	3.00781	2.90931
UTS2	1.11773	1.14413	1.11773	1.11773	1.12737	1.11773	1.12951	1.18261	1.11773	1.12798	1.16517	1.11773	1.14543	1.13211	1.11773	1.11773	1.12515	1.11773	1.1377	1.11773	1.11773	1.11773	1.18154	1.11773	1.11773	1.16861	1.8174	1.11773	1.11773	1.11773	1.11773	1.1514	1.12569	1.13403	1.14053	1.11773	1.24574	1.11773	1.11773	1.15874	1.11773	1.13464	1.13112	1.24398	1.11773	1.11773	1.11773	1.12538	1.1263
TNFRSF9	1.13881	1.14901	1.10895	1.23957	1.10097	1.10401	1.1045	3.51916	1.10097	1.10722	1.15559	1.10097	1.10097	1.10097	1.14514	1.10097	1.12564	1.10977	1.10302	1.10097	1.1087	1.16044	2.07764	1.10097	1.10623	1.10409	3.21381	1.10097	1.10097	1.10557	1.12137	2.46928	1.11059	1.1059	1.20116	1.10097	1.22806	1.24591	1.1147	1.11758	1.10335	1.10352	1.10911	1.16365	1.11248	1.10097	1.29839	1.10327	1.10097
EPN3	1.0293	1.14086	1.00966	1.02424	1.04423	1.03765	1.03807	1.06371	1.00679	1.00198	1.00612	1.03217	1.03849	1.10924	1.00198	1.01092	1.04102	1.02112	1.18327	1.04212	1.02981	1.17847	1.02686	1.26667	1.03993	1.00645	1.04035	1.02526	1.03251	1.01539	1.01885	1.03521	1.09963	1.00198	1.01193	1.04086	1.00713	1.01244	1.01522	1.02897	1.01564	1.11708	1.00789	1.04229	1.01025	1.05258	1.05418	1.00198	1.05081
LTBP1	2.2972	2.40088	3.62076	2.41315	4.10462	5.63391	4.5155	2.63903	3.98193	3.28641	3.44334	6.74268	3.31941	3.417	2.60579	3.26567	2.46556	3.00111	3.44367	2.79143	1.97421	2.25663	2.59805	2.64043	2.89677	3.45173	2.34962	2.62192	10.018	2.12513	1.9227	2.352	2.89191	4.23801	2.25301	6.29577	1.94269	3.93264	2.11468	3.062	3.95576	6.57909	1.77852	5.24056	3.57006	5.4885	3.25037	3.37471	7.56485
RCN1	7.51412	7.64623	7.24991	8.31462	10.1978	8.12852	10.8628	9.31835	6.11455	7.45424	9.66633	6.95143	7.35435	7.8082	10.9733	5.82244	10.4875	10.2472	15.6731	9.27764	11.3032	9.56087	8.01331	10.9312	14.8863	7.07191	9.15143	8.13756	11.2462	7.58477	4.92897	11.9308	10.2996	6.39723	9.6235	5.95274	6.73335	8.81813	7.37227	9.66893	7.55357	8.91488	5.51634	7.32732	6.17687	10.96	11.6614	6.62694	11.2155
ELN	1.47598	1.24865	1.32562	1.85801	1.46133	1.12392	1.43539	2.08198	1.43013	1.14315	2.88189	3.25691	1.33325	1.36491	1.02514	1.1671	1.41243	2.25529	1.33981	1.16214	1.32951	1.19815	1.19815	1.18976	1.33943	1.88547	2.95696	1.29984	1.02384	1.08235	1.57347	1.28	1.21096	1.05977	2.08808	1.20845	1.70109	2.72627	1.24331	1.09639	1.06961	1.27008	1.44737	1.24872	2.92164	1.14299	1.28977	1.12964	1.52998
RFC2	13.2549	7.99108	5.44857	8.98866	8.52975	7.15377	6.22552	12.1836	5.87397	8.15979	7.52005	9.88609	9.03905	8.11938	10.4819	8.60582	11.5898	14.6686	7.43293	10.4258	6.59655	12.8861	10.1614	11.6885	8.98183	7.66123	9.15983	11.3097	6.4151	12.89	8.33166	12.3363	7.51759	7.3465	11.6102	6.35904	15.6576	10.1706	8.87769	7.28246	5.42165	6.9224	5.03659	9.85786	5.67903	9.14779	13.8018	8.26708	8.69701
ARID1B	3.16755	4.79564	5.60848	6.29762	5.40308	4.26096	3.21557	3.84945	4.82346	2.59326	3.88776	3.80521	3.31431	4.05671	3.58616	2.48319	4.01516	4.47007	3.75989	4.39392	2.95575	3.02296	5.00467	2.88831	7.22277	4.1095	4.2541	3.63787	5.72942	4.3459	4.52641	3.53552	4.9565	3.18844	3.29596	3.21596	3.48149	3.52843	3.91065	3.21002	5.83856	6.62497	2.68829	5.91702	3.56743	3.92938	3.28517	3.66955	7.05945
CLPTM1L	12.2754	11.189	19.6652	16.0359	12.8022	11.385	11.2711	13.391	16.5164	16.9213	17.1137	17.2533	11.367	11.2558	10.0836	12.6461	15.3222	18.4527	11.4679	8.87728	10.1132	16.6481	18.5202	13.9383	15.5296	7.82958	17.2401	12.2225	12.7694	8.55721	20.9304	13.3743	6.58611	15.1194	12.917	13.5974	16.2056	15.4748	13.5611	15.8428	14.6072	11.3369	8.47246	9.05705	18.0194	7.5403	15.097	10.7834	13.6108
NEDD4L	5.55937	8.82424	6.89585	7.2365	6.74412	7.44629	5.45679	6.787	5.72372	4.4039	6.4602	5.48359	5.0683	5.40533	7.52694	4.12847	8.43494	8.67565	7.59282	8.4102	4.39309	6.13859	8.06872	4.96225	9.16374	8.03944	8.66822	7.62449	10.0428	5.22152	5.7144	6.81479	6.57737	6.42498	6.85973	6.84324	6.16828	7.53518	4.95244	7.50104	6.99959	5.93713	4.62877	8.46809	6.1846	6.42375	7.52158	7.06234	7.17218
FOXP3	1.25599	1.38503	1.31833	1.34839	1.29967	1.26578	1.5208	1.5361	1.2553	1.7443	1.5455	1.60547	1.23526	1.29079	1.39092	1.3373	1.43658	1.30058	1.24674	1.37807	1.3054	1.50099	1.67623	1.23557	1.21576	1.2719	3.05878	1.32598	1.23473	1.28988	1.47735	1.97194	1.24398	1.27924	1.43658	1.24268	1.5644	1.35512	1.47207	1.29263	1.27397	1.28835	1.51544	1.47215	1.47315	1.38556	1.44186	1.25913	1.30969
PPP1R3F	1.72476	2.33167	1.85319	1.64198	1.93665	1.9711	2.32323	3.07828	2.35599	1.82664	2.45978	1.88848	2.28242	1.66707	1.6838	3.30344	2.18905	2.65349	2.54832	1.95767	1.73381	3.24437	2.84007	1.87352	1.58913	1.78138	3.67674	1.92031	1.74617	2.11149	1.94479	2.18844	1.87459	1.77018	1.9207	1.91517	1.42518	1.84989	2.16097	1.7299	2.85334	1.85779	1.98936	1.61245	3.65618	1.41245	2.20946	2.20094	2.14218
HEXB	21.6136	41.9036	17.3264	44.0808	17.518	15.329	15.9732	38.3398	11.7747	8.26563	20.962	10.9011	14.337	11.1132	12.6978	11.1591	33.6037	39.2752	32.2434	34.4545	12.3033	23.6922	35.6451	32.4954	35.5518	16.5876	30.8551	37.7634	13.8845	32.221	24.4484	35.8009	21.5922	11.0663	25.9874	4.25855	51.2039	34.0935	18.4606	13.6829	23.4731	17.2008	7.47627	14.6664	11.4866	7.92556	28.1322	17.2173	9.34604
PTCD2	2.91956	3.51958	2.92005	3.36912	3.20996	3.23778	2.60724	3.29514	2.62231	2.45833	2.92111	2.64896	2.62521	2.50352	3.53928	2.50942	3.65729	3.66579	3.32344	3.10479	3.17375	2.64452	3.24299	2.69474	3.44203	3.22551	3.04057	2.97712	3.66502	3.09359	2.50546	3.41055	2.93057	2.57026	2.51791	2.32003	2.94158	2.8397	3.26771	2.69291	3.29504	3.57849	2.47117	3.38698	2.44037	2.62366	3.74479	2.88364	2.86635
JKAMP	6.46718	17.6214	4.95702	12.1247	6.00409	6.44775	4.25943	11.5411	4.35965	4.33869	5.61107	5.29961	5.78864	4.33479	7.45151	5.56792	13.0925	13.2711	8.56116	7.70322	5.28378	6.31906	10.7122	5.89063	11.9382	7.23921	12.2954	8.41243	6.88911	8.24075	6.04846	14.8633	6.44935	4.67677	4.80454	3.16753	8.25843	7.73283	6.31723	5.04707	7.4711	8.54647	3.20288	7.54493	4.20725	5.04707	14.5108	7.08084	8.98478
DKK3	1.59475	3.03652	1.62399	3.4062	1.30638	1.16353	1.21201	7.38098	1.62735	1.22934	15.918	1.72095	1.27699	2.0081	1.25194	1.24645	2.11109	1.51619	2.60728	1.12673	1.34738	1.27783	1.15269	1.34272	1.69744	1.47595	2.02658	1.2734	1.19537	1.24599	1.32829	2.33258	1.26057	1.10352	1.29737	1.21178	1.21911	7.08749	2.35808	1.22194	3.14852	1.1407	2.70173	1.26836	2.25997	3.13271	1.88212	1.78776	2.67859
ARHGEF5	2.22464	3.80508	3.41861	3.11706	2.8619	4.10261	4.05928	2.67539	3.33877	3.12431	4.23277	4.8599	3.39407	3.38865	3.03801	3.11034	3.12789	3.141	4.95302	2.82547	2.76877	4.39071	3.48186	2.74012	3.11837	3.36987	2.94253	2.64054	3.40062	2.61765	3.14598	2.90688	4.10873	4.05002	2.74126	7.44091	3.25334	2.81761	3.58276	4.35717	3.35371	3.08037	2.54715	2.77803	3.87487	2.89745	3.26531	4.99111	3.00367
NFE2L3	1.37855	2.39094	1.42572	1.53461	2.0186	2.25969	1.31612	1.83125	1.33769	1.23434	1.81742	1.23805	1.26294	1.71169	1.67361	1.55832	1.93982	1.43663	2.02121	1.88158	1.71849	1.25694	1.57538	1.32205	1.33588	1.39095	2.51619	1.48957	3.06862	1.60431	1.25583	2.46364	1.29487	1.46081	1.32466	1.25085	1.27906	1.44927	1.83449	1.37689	1.80027	2.18312	1.29084	1.67692	1.36796	1.28688	1.66879	1.6194	1.44058
MCUR1	5.85698	5.29673	7.74136	5.92362	7.97982	7.2881	6.33541	7.15695	5.10374	5.45337	7.98919	9.36161	5.55258	5.49373	8.49437	5.46698	7.40187	7.8585	7.3132	6.34879	5.50074	5.14433	5.61686	4.67936	6.05926	6.84114	7.33311	5.46691	8.89758	7.93482	4.28912	5.43426	7.60336	6.61471	5.13072	3.49969	5.43347	5.1046	4.853	6.82966	6.06862	7.71996	3.62911	9.42684	4.07575	5.52945	7.26096	9.22802	7.56953
LIMA1	6.99133	9.27644	3.01928	5.67206	5.83441	3.30414	2.98516	5.83225	3.27264	1.94858	4.35782	2.75192	4.26062	3.33834	12.5586	2.11039	6.64417	6.61268	4.12427	7.3945	9.90056	3.88755	5.13756	4.03288	17.9527	5.6969	19.2634	5.5713	4.48303	11.3087	3.04428	7.11476	5.31601	2.20496	5.25302	1.58858	5.3027	11.1056	4.09626	5.3564	3.78091	8.95769	2.42566	5.37753	4.00796	6.41898	6.24518	4.75388	7.13991
LETMD1	18.8426	12.4206	24.2607	11.4278	28.7093	25.5366	30.868	11.5924	27.5944	17.0153	18.704	18.7725	24.8061	11.7893	21.951	21.6647	9.2307	9.03747	25.0112	28.4872	16.5299	12.6282	12.6148	15.2234	23.4313	22.9347	6.98109	19.3586	30.1287	23.9847	16.7064	10.2599	18.3294	24.1863	15.4686	11.2988	7.85999	17.0579	22.4521	14.3688	43.6869	37.0684	14.0309	5.67367	8.61976	12.4889	8.61108	22.4053	15.8564
SLC4A8	1.23163	1.27789	1.22515	1.2697	1.22875	1.22668	1.22587	1.35549	1.22695	1.22794	1.30679	1.25314	1.23181	1.23154	1.23163	1.22551	1.24747	1.28383	1.25287	1.23118	1.23352	1.23154	1.24225	1.23343	1.22821	1.23028	1.27924	1.2481	1.22542	1.25818	1.23658	1.24882	1.22866	1.22497	1.23649	1.23352	1.2409	1.25962	1.31363	1.23433	1.22677	1.22506	1.2436	1.24603	1.23424	1.33163	1.24531	1.23847	1.23721
LAMC3	13.3241	3.26563	7.17643	1.89022	3.5331	2.34605	4.46625	6.49406	9.14319	12.514	3.61832	14.9724	3.97566	2.88869	4.66596	3.58547	5.02871	3.34734	2.23003	0.757896	4.37882	22.2106	2.1397	5.9127	7.47295	4.44894	3.09366	3.44803	1.39559	0.973765	3.25335	2.93603	4.22271	1.63967	2.86255	3.73136	0.999758	4.1721	8.03854	9.12696	7.99433	4.51953	3.1522	1.48546	2.97277	7.60665	4.58691	1.28995	11.5829
PTGER3	1.18824	1.22747	1.1933	1.25473	1.18405	1.19096	1.27534	1.18257	1.19935	1.17887	1.18948	1.17554	1.18072	1.21267	1.32949	1.17579	1.32493	1.26978	1.27534	1.2176	1.26078	1.19429	1.26732	1.19589	1.20588	1.20009	1.26251	1.23327	1.20823	1.18565	1.19256	1.20736	1.17196	1.17455	1.22081	1.21822	1.22883	1.23635	1.21255	1.17369	1.17196	1.17221	1.18565	1.17307	1.19232	1.22389	1.32468	1.17653	1.16962
TNIP3	1.17546	1.21237	1.17546	1.21807	1.17546	1.17546	1.17546	1.22084	1.17546	1.17546	1.19534	1.17546	1.17546	1.18301	1.18393	1.17546	1.18326	1.17546	1.17898	1.17546	1.17546	1.18628	1.2647	1.17546	1.17546	1.18083	1.40888	1.17546	1.17546	1.17546	1.17546	1.31662	1.17966	1.17546	1.18142	1.17546	1.18771	1.20884	1.18729	1.17907	1.17546	1.17546	1.17546	1.1935	1.17546	1.17546	1.20482	1.18351	1.17999
MAPK9	3.72708	4.96952	4.59902	4.89324	4.62953	4.97238	3.20927	4.82547	3.621	3.05441	3.9571	3.44684	3.41704	3.46241	4.91493	2.58054	4.41206	5.16053	4.93678	4.58638	3.27021	3.57834	4.79964	3.91785	5.34439	4.16186	5.05191	4.63636	4.74998	4.76238	3.23048	4.89499	4.4796	3.07213	3.68075	2.35083	3.99262	4.54038	5.20645	3.5464	5.34153	5.53444	2.76527	4.86313	2.61836	3.54417	4.48873	3.8643	4.14843
COL23A1	0.822066	2.05108	0.924321	1.80117	1.04574	0.834293	1.37104	1.90685	0.993322	1.60094	4.30491	1.63154	3.57682	0.956797	4.34066	1.74922	3.56451	0.819963	1.96892	0.857657	1.25788	1.124	0.956563	4.22906	1.10913	1.44806	0.969959	1.34183	0.74551	0.95119	1.09768	1.0934	2.65247	1.65491	1.10671	2.90028	1.80584	2.20816	2.25715	1.02634	0.825882	1.02276	1.575	3.24295	0.900412	7.29595	1.4986	1.76869	1.04854
BCAR1	3.39491	4.56322	6.70015	5.96136	5.55061	5.07927	5.11079	3.99147	6.52403	6.29039	4.33331	8.38291	7.90104	5.07736	2.01524	8.28531	7.45641	6.65795	3.86259	2.44728	2.90778	11.7113	7.16614	10.2174	8.98541	4.95619	4.9858	4.53247	3.62787	8.99129	8.31141	4.89057	7.03406	6.08574	6.95386	3.83481	6.36288	7.50677	4.03633	8.38413	3.29098	5.50857	3.15348	2.77585	5.99905	7.19293	5.48697	7.15508	6.21454
FAM160A2	4.44663	8.40089	6.17664	6.62101	6.03436	7.31654	4.60813	6.27199	6.49362	5.35027	5.23505	6.57289	6.09841	6.04653	7.19668	4.08545	7.91264	7.51103	8.2691	5.68655	5.30951	6.58217	8.14788	4.56225	7.63073	5.91426	6.42092	5.6598	8.09183	6.97594	5.43282	6.45415	6.4455	5.10863	5.58406	6.4503	5.50159	5.5626	6.3479	8.36822	5.20214	8.87328	4.12997	7.91096	5.47285	7.86148	7.06457	6.04445	9.54872
HERPUD1	7.26645	8.92977	7.09821	11.0536	8.12598	9.6328	7.43598	8.14228	7.17787	5.77867	8.16216	8.14495	9.04553	7.21725	6.00593	6.71939	11.2855	11.7423	12.4668	4.55319	4.00019	10.4821	11.7736	7.8892	15.4314	10.1268	21.1433	5.13192	9.44773	9.48383	5.98986	8.97684	9.98915	8.15028	7.43636	8.03398	8.44768	10.7429	8.68979	10.1044	9.18848	8.6099	4.53643	10.9956	5.78248	8.2192	9.55077	11.3459	10.7395
HOMER3	4.22416	3.00292	6.76354	3.71867	5.48743	4.5621	5.06507	3.09483	9.76493	6.01034	10.2065	6.24811	6.41284	11.0284	3.3527	6.18302	2.2592	3.98448	3.11256	5.36618	6.02937	4.08411	3.65037	6.46762	3.45225	4.53597	4.09244	7.33206	2.4078	6.6827	8.1761	3.32091	4.849	4.74914	6.51561	6.8945	6.95233	4.35642	12.8598	4.31982	5.8256	4.53184	9.03084	4.87811	6.23314	5.12879	3.18201	5.14896	7.55104
RAD51	1.92891	1.84937	1.55247	2.0774	2.0916	2.08979	1.71787	2.79571	1.85142	1.62626	2.32644	1.90256	2.11343	1.35842	2.8865	1.43238	2.54601	2.41657	1.47958	2.19067	1.52119	2.38702	2.39555	1.83311	2.28622	2.054	1.98045	2.56867	2.11384	2.16046	2.01033	2.16268	1.98029	2.00081	2.16268	1.81391	1.60352	1.86742	1.80373	1.71729	1.4057	1.61904	1.33889	1.73379	1.38576	2.20397	3.05617	1.87219	1.81095
POLQ	1.02627	1.07529	1.00242	1.1258	1.29274	1.31477	1.02461	1.16307	1.01633	1.0001	1.11918	1.04349	1.1152	1.02561	1.38433	0.991491	1.25117	1.21275	1.03786	1.11752	1.08159	1.03008	1.1157	1.01153	1.08059	1.06304	1.31808	1.04962	1.488	1.16224	1.00971	1.16804	1.10427	0.999937	1.10742	0.990497	1.01435	1.03207	1.09086	0.980229	1.13673	1.51202	1.0271	1.09434	0.973936	1.11603	1.24107	1.02329	1.26012
PIK3CB	10.8083	9.68116	6.89713	6.58824	6.16391	6.77442	5.45025	9.09145	4.87901	6.8072	7.3813	6.86705	7.09947	4.17626	13.832	5.75489	9.9483	9.26573	5.62113	4.52883	7.48305	7.75723	7.52759	5.33558	10.3131	11.2065	9.32457	7.11872	8.46076	5.70301	4.01381	8.92444	6.93207	5.57976	4.33384	4.2494	6.453	6.15625	6.57942	8.58145	6.50465	7.09406	3.41203	10.8467	3.27696	9.12075	9.35364	6.86867	9.7925
CYBA	19.0183	4.05254	31.1768	37.6022	22.9104	10.1147	61.2372	15.9207	34.4893	46.2839	48.7433	36.1137	24.446	57.0891	5.57917	79.7898	18.7705	34.6514	11.1088	23.7732	8.32559	38.7286	35.4992	84.9073	38.2631	9.45162	52.5726	22.3651	3.00901	21.8923	111.295	19.9093	16.1052	21.7359	68.3577	19.9669	109.47	39.2978	50.303	39.2146	24.8857	8.07488	51.7905	19.0161	40.574	45.2245	10.1762	23.4896	14.7162
HEBP2	1.93962	1.67386	3.72939	3.58924	4.88776	4.47616	4.47146	2.19333	4.44166	2.00268	4.11004	2.49607	2.25383	3.78493	2.89331	1.95811	2.32159	4.59518	5.20651	4.78468	2.62326	2.13416	3.33042	2.37912	3.50234	2.43615	4.07389	2.11938	4.06398	3.47535	1.96801	2.74747	3.43639	3.17641	2.94894	2.43689	3.58446	2.31516	4.10822	3.28378	4.6045	4.53765	3.63629	3.87721	2.66139	2.56623	2.34767	4.11755	4.02825
MPHOSPH9	2.62201	3.94517	2.09541	3.23026	2.3911	2.54017	1.94238	2.99295	1.90403	1.84331	2.21028	1.9043	2.06428	1.88878	3.05647	1.86568	3.80332	3.46549	2.40698	2.71477	2.2064	1.96638	2.63491	2.17752	2.89613	2.33751	2.56814	2.48928	3.29378	2.68797	2.00094	3.12658	2.15533	1.92298	2.09072	1.79223	2.00969	2.34716	2.22778	1.90773	2.32108	3.04186	1.84962	2.09568	1.91035	2.09027	3.27664	2.07565	2.67939
PLEKHA5	6.0237	12.7655	5.0747	9.34528	10.2591	5.69494	2.73288	7.73075	3.58569	3.3232	3.80084	3.45292	6.65868	5.6315	7.83046	2.89688	6.80916	8.81497	7.15326	8.4672	8.96178	3.45467	7.15807	4.1644	10.0164	9.6512	7.11936	7.98835	12.4929	8.57638	3.39825	8.08562	9.35871	5.02156	4.78664	2.57484	4.94093	7.33474	5.56905	3.52843	7.57966	15.2233	3.33886	16.0494	3.4859	6.54477	6.19052	6.8978	15.3225
PRSS8	0.930575	0.962131	0.930575	0.991406	0.942133	0.96099	1.08554	0.956504	0.930575	0.936734	0.981673	0.960002	1.01916	0.930575	0.935441	1.04053	1.04152	0.939319	1.48528	0.948824	0.930575	0.961447	0.939091	0.930575	0.946087	0.954983	0.930575	0.943273	0.936506	0.953463	0.936354	1.04653	1.01148	0.959926	0.930575	1.23123	0.93757	0.94487	0.939623	1.0698	0.930575	0.935669	0.938559	0.951181	1.02121	0.950345	0.943121	1.04555	0.94084
SIKE1	2.78696	5.31108	2.10225	3.54229	3.4153	3.23631	2.12034	3.84765	1.74684	1.8085	2.40044	1.89917	2.3132	2.16555	2.94046	1.77576	5.06177	4.6026	3.30608	2.3716	3.6643	2.43412	3.68878	1.88927	2.60157	3.39628	4.27416	2.17771	4.1255	2.42741	1.65009	4.62505	1.94548	2.0101	2.46881	1.51819	2.20469	2.72896	2.43155	2.10638	2.98435	4.44396	1.87181	4.63098	1.64417	1.8902	5.21325	2.6892	3.21939
RRP12	6.06249	5.08811	7.45705	5.37225	4.02831	4.55288	4.61067	7.5054	6.03363	9.72656	8.31304	7.95353	4.34701	5.72003	7.62836	6.21933	7.22492	6.45816	4.04742	3.8248	6.1642	7.07151	6.79118	4.44249	3.63385	5.19942	6.24826	5.70625	4.80192	4.18736	7.74119	6.93461	5.03025	8.33695	5.58702	7.95315	4.75251	4.45056	6.05213	9.14337	4.23821	3.43042	2.67181	3.69225	9.73844	6.83716	8.43463	3.60782	4.74238
FNIP2	6.12555	17.7541	6.30589	11.8441	7.76944	6.6265	4.6721	10.158	4.95439	3.91248	4.72999	3.49107	4.81466	4.79447	4.22017	3.36434	13.5751	7.88263	9.56973	7.0278	5.07294	5.12242	12.1697	4.94949	14.4707	6.51186	8.89303	4.33214	11.4453	9.04148	6.11201	7.53671	8.14619	4.23631	6.89403	3.76633	7.39743	6.97984	7.05365	4.34789	9.87818	8.79651	3.84006	11.5188	4.00908	5.7296	10.138	5.14735	10.5064
MSMO1	3.40024	7.3248	4.26094	6.13878	5.04622	4.32733	3.5314	4.71514	3.59674	2.5258	4.95301	3.25111	3.04104	3.66273	4.64298	2.85445	5.73651	4.16854	9.01305	4.7817	3.78317	3.20341	4.35708	5.00494	3.74156	3.81746	4.19211	2.8195	5.77877	4.93928	2.71556	3.97683	3.79373	3.34432	3.04307	2.80495	3.24152	4.18512	5.70148	3.15253	4.97365	4.95431	3.58926	4.43997	2.64014	2.97431	9.41174	4.76179	4.82006
TTC17	5.38188	8.69101	5.20283	7.42359	6.29135	5.25141	3.58171	6.32093	4.38543	3.78664	5.3767	4.51961	5.46947	5.85593	8.5987	3.41293	8.06371	6.68699	6.81174	6.87709	6.61176	4.70152	6.20445	4.63308	7.7243	7.8421	5.87346	6.89586	6.32966	5.87014	4.0899	7.46592	5.99388	4.31746	5.22013	2.96608	5.40892	5.93518	5.31576	5.31916	5.91471	8.25064	3.16351	6.8879	3.27382	6.85979	8.51999	4.66861	8.84534
ALX4	0.964886	0.952173	1.04829	0.964273	1.02615	0.964273	0.972468	0.969558	0.939077	0.958147	1.00992	1.37645	0.984875	1.02125	0.976144	0.938847	0.947271	0.969787	0.981582	0.949952	0.935631	0.961516	0.946735	0.949416	0.946506	1.15888	0.975455	0.948956	0.979207	0.938005	0.941604	0.956691	0.943136	0.96121	0.942753	0.944897	0.935631	0.978059	0.940379	0.963507	0.95761	0.935631	1.02792	1.01114	1.36834	0.940762	0.948803	0.957304	1.75379
FSTL4	1.96002	1.83553	2.18899	1.92541	1.20436	1.0458	0.946659	2.65321	1.95492	0.97994	1.58694	1.01424	1.21236	1.37124	1.09336	1.11079	1.4688	2.01803	1.96293	1.70068	1.20059	3.10887	1.80013	1.28607	1.50491	1.03222	2.5021	2.43295	0.977272	1.66339	1.77085	2.06073	1.44737	1.09509	2.07784	1.00757	2.43287	2.42596	1.98341	1.12696	1.52548	1.19972	1.6579	1.24745	1.96112	1.12406	1.4411	1.0414	0.996817
FOXN3	4.76552	8.92153	7.06917	6.01153	5.77256	6.10954	3.50642	5.64737	3.97227	3.31186	5.31008	3.48613	5.00786	3.67878	4.96537	3.15497	5.70786	5.46115	4.31109	3.56929	3.13537	4.3323	6.96305	3.37695	6.04652	6.37324	5.43029	4.85136	6.95723	5.30801	3.21508	5.05549	5.09469	3.05459	3.73192	2.27688	4.65925	5.98634	5.56391	3.51301	7.82338	5.82217	2.87351	7.42859	2.63568	4.90771	4.3081	4.81192	7.68333
AKR7A2	32.8371	16.4559	25.5086	17.0217	19.0714	16.4859	24.2917	21.6917	29.1952	31.4469	24.5088	35.7118	30.1611	24.1514	7.09594	34.6362	24.3734	37.6407	6.41537	6.6772	7.07371	55.2207	25.1517	15.7117	17.9846	22.2498	38.434	14.1848	15.4603	7.13971	29.2197	22.7806	11.3785	29.8759	33.9595	42.0646	26.3295	11.0445	43.0198	40.2046	27.2996	15.5241	15.3559	22.8829	28.0285	23.7058	27.4462	30.609	12.2039
MRTO4	19.3728	16.1266	12.5849	14.5717	17.388	11.6928	12.4773	20.0325	13.531	19.385	16.1058	16.4764	12.6599	15.7906	8.75768	14.4289	24.1656	24.1373	5.79952	10.5171	9.61558	19.1993	20.3331	10.0204	10.6077	15.776	15.0173	12.0981	15.1603	8.3753	11.777	23.7661	7.3317	19.1967	17.4973	11.0751	9.91342	8.75432	15.6668	19.4596	13.6001	14.1635	9.43263	13.7536	8.94269	11.9294	25.7886	11.5804	9.81661
NNAT	1.20127	1.67001	1.21636	1.5034	1.23638	1.3103	1.14491	3.53828	1.18988	1.15885	2.09741	1.35857	1.20766	1.22298	1.39738	1.15877	1.38629	1.22383	1.53389	1.58994	1.43749	1.14491	1.23153	1.29382	1.3327	1.3384	1.26364	1.26033	1.32023	1.94434	1.18395	1.29343	1.31761	1.18918	3.50963	10.1435	1.19234	1.30706	1.37012	1.16347	1.17663	1.50093	1.34487	1.30075	1.35033	4.03027	1.26841	1.23869	1.79574
USE1	20.8934	8.65697	11.0226	9.95832	15.3872	9.52187	19.4244	14.0254	16.2012	23.9053	9.81504	13.8583	18.9752	24.714	10.3743	13.7481	10.7912	13.6678	8.98345	15.7851	16.7889	23.8066	13.3339	24.801	12.8953	7.6222	7.62021	26.3925	10.6598	13.5654	21.2789	11.1165	10.0191	11.433	27.9551	16.5225	30.1489	12.1616	19.5801	13.4134	18.7111	12.5516	18.0479	9.8232	16.213	15.5923	12.4368	5.45259	10.3182
MCF2L2	1.23872	1.25658	1.24049	1.25819	1.23745	1.2416	1.23482	1.27859	1.24651	1.23372	1.25294	1.23846	1.23821	1.23508	1.26496	1.23669	1.25946	1.24566	1.25878	1.24329	1.25692	1.23973	1.24532	1.24532	1.23872	1.23762	1.246	1.246	1.23855	1.24549	1.23931	1.23694	1.24905	1.23533	1.23922	1.23796	1.24608	1.24371	1.28536	1.23702	1.2427	1.24354	1.25565	1.23812	1.23558	1.25438	1.24524	1.25074	1.25523
NRIP2	2.5188	3.22287	2.23365	3.13754	2.31266	2.42724	1.33368	2.28163	1.95373	1.65318	1.88612	2.61152	1.77008	2.60551	1.76261	1.32175	2.71909	2.59003	1.6538	2.02473	2.12022	2.68721	2.12476	2.29903	3.47537	1.91523	3.15772	2.43695	2.31458	1.768	2.49824	2.58495	1.91361	1.52828	2.23704	1.44465	1.79349	2.40522	2.29472	3.06431	2.15002	2.8373	2.06878	2.70292	2.04168	2.6213	2.66688	1.92832	3.38004
LAMA3	1.04005	1.15789	1.09286	1.20577	1.09237	1.13679	1.05684	1.09916	1.14284	1.03574	1.14419	1.07041	1.06917	1.06806	1.07263	1.02537	1.15678	1.08312	1.0419	1.07559	1.04462	1.08929	1.08447	1.10471	1.26783	1.10668	1.11927	1.11051	1.11446	1.0788	1.09965	1.06806	1.10496	1.02907	1.16702	1.02229	1.10533	1.10508	1.04647	1.05622	1.04413	1.07164	1.05412	1.05832	1.07214	1.04894	1.1115	1.05153	1.09114
AP5M1	3.46104	4.87588	3.55869	4.22844	3.86943	4.39726	3.16435	4.23925	2.90239	2.37089	3.54055	2.85071	3.00251	2.82406	3.43975	2.59114	4.67539	4.42587	4.47609	4.2745	2.95611	2.78507	4.00258	2.77775	4.51994	3.48666	4.38151	3.32397	4.85971	3.72998	2.58475	4.52539	3.26668	2.9556	2.94819	2.13328	3.80592	3.24931	3.45057	2.84799	4.04821	4.71941	2.56074	3.44886	2.39601	2.70581	4.4125	3.80302	3.78327
ANAPC4	4.3888	7.89958	3.8106	5.78827	5.43099	4.76518	3.80986	5.007	3.54853	3.44018	3.77961	4.20615	4.36368	4.19202	5.6238	3.45761	8.18893	6.95418	5.30668	5.54818	5.77273	3.7749	5.16147	4.18607	5.2466	5.02957	6.13886	5.32107	5.39454	5.81323	3.45265	5.92877	4.44054	3.80341	4.52459	3.22356	3.94589	4.93394	4.91353	3.71514	4.7022	7.68577	3.9578	6.16184	3.36414	3.91928	7.56767	4.44632	6.52201
KCNQ1	2.52365	4.23595	3.50893	3.31155	4.18078	4.08963	5.02199	3.07757	4.96064	2.38136	4.49492	4.18062	2.68265	4.52154	1.47901	4.4471	3.53277	3.97249	3.74423	2.34205	1.71207	4.77687	3.41477	3.70469	2.98116	2.29384	3.59799	3.65177	2.77689	1.9007	4.39642	3.47133	2.67809	2.33276	4.36632	2.53696	1.89583	4.1147	5.65035	2.94874	4.917	4.36222	4.96257	2.82069	2.18181	4.23796	3.5843	1.81907	2.13677
TRAPPC3	16.0807	20.9807	14.6873	10.8923	17.7708	14.9135	12.8039	19.3392	15.3627	12.3601	18.0066	14.7457	14.9584	11.03	7.07862	14.0973	15.5693	17.7041	7.43941	11.2025	8.68698	17.4664	16.9239	7.69283	9.70669	12.1317	18.7554	9.51714	13.737	8.5339	8.36366	26.6671	7.17408	15.8479	15.6911	10.816	10.9166	14.8488	23.4393	15.4671	18.4064	19.4823	11.8219	13.216	5.9008	6.95577	18.4125	17.9468	6.94859
THRAP3	22.0549	35.5993	31.0135	22.3762	29.1442	21.3552	15.5816	34.1767	19.64	15.4712	41.3161	19.5013	29.9796	14.0848	15.4064	17.3851	34.0365	27.1531	12.4326	12.6971	9.14576	20.2652	28.223	8.60861	23.453	30.9138	27.3581	16.414	26.5042	12.785	15.2982	32.3624	21.3723	25.2654	15.9512	17.2813	23.0014	25.5882	29.7962	22.6806	27.4196	28.7435	7.82346	40.2289	12.3725	23.7215	32.06	48.4867	20.6329
PHPT1	44.3399	39.8171	67.2014	49.4425	41.8218	26.6599	32.5412	45.0327	52.4003	41.0642	44.5812	59.5774	31.9895	53.3795	22.4814	53.8474	44.1393	48.926	24.6287	37.0076	30.529	66.4767	55.9233	68.5506	39.961	14.7414	49.7158	47.855	17.4608	44.3741	71.729	46.4728	26.515	44.3336	74.933	48.5719	54.5769	39.3503	58.2384	53.6121	27.4351	29.2902	56.2908	27.4767	33.4624	40.5839	38.1849	41.5536	18.6051
ENTPD2	1.00333	1.39766	1.04736	1.15368	1.00173	1.06447	1.14106	1.16478	1.02698	1.48854	1.59668	1.11505	1.55622	1.06964	1.20061	1.09246	1.08227	1.16874	3.27158	1.31674	0.999372	1.07976	1.42747	1.18958	1.32077	1.11284	1.07352	1.0755	1.02249	1.71533	1.12463	1.07314	1.20768	1.02629	1.17437	1.77951	1.06865	1.24023	1.08409	1.11611	1.01375	0.999372	1.11786	1.00553	1.10995	1.00447	1.10508	1.05481	1.05162
LY75	1.33123	1.39645	1.33156	1.37476	3.5225	1.37476	1.31901	1.50111	2.35359	1.3177	1.41161	1.30874	1.31672	1.35243	1.34379	1.31754	1.34085	1.41911	1.37819	1.31542	1.45171	1.3177	1.45024	1.31819	1.33873	1.36172	2.39875	1.31803	1.37346	1.31868	1.31705	1.75054	1.31901	1.30874	1.34819	1.41128	1.33401	1.36743	2.2543	1.76864	1.65322	1.37118	1.34933	1.53274	1.39074	1.34444	1.36938	1.33531	1.36074
ARID4B	2.19026	4.52413	2.26535	3.74628	3.2383	2.79583	2.17709	3.08206	2.13703	2.29567	2.41313	2.01654	2.42167	2.38648	3.34395	1.98742	3.47537	3.3686	3.32304	3.05876	2.8232	2.13033	3.48758	2.28857	2.52923	2.98582	3.01766	2.47856	3.02149	2.60687	2.08461	3.83198	2.59203	2.10927	2.22154	2.04487	2.39948	2.39829	2.43036	2.05875	2.49444	4.027	2.12618	5.66665	2.06506	2.27899	3.56602	2.46077	4.90316
OPN3	2.85745	3.37442	2.78818	3.52053	2.75405	2.66563	2.53628	3.47941	2.67281	2.64467	2.66343	2.51752	2.66503	3.10116	2.47361	2.65485	3.73111	3.36604	2.80595	2.66303	2.38179	2.94407	3.59758	2.35305	3.47582	2.64127	3.14907	2.71074	2.54487	2.45285	2.61972	3.32731	2.56004	2.6802	2.87102	2.99358	2.89896	2.86044	2.60195	2.45943	2.44646	2.61034	2.38818	3.09198	2.46043	2.53948	3.4832	2.7816	3.1844
SDCCAG8	2.53493	4.00761	2.40907	4.42478	4.29624	3.6071	2.40217	3.24595	2.15352	2.07141	2.71581	1.91954	2.13403	2.16703	4.70205	1.60927	3.86219	3.44924	3.92235	2.80975	2.44952	2.18683	3.10589	1.79007	3.80455	3.35922	3.62291	2.99585	2.69977	2.86178	1.72331	4.02473	2.62856	1.97709	2.27117	1.37275	3.39936	3.06699	2.53109	2.23625	3.62981	4.921	1.53989	6.46198	1.66007	2.3869	3.95643	3.09193	3.82389
PTPRN	1.08729	1.17895	1.07983	1.17294	1.08021	1.08486	1.10153	1.51453	1.08562	1.08052	1.29802	1.07603	1.08402	1.09163	1.09354	1.09369	1.10336	1.1769	1.10633	1.11401	1.08151	1.07823	1.12216	1.09026	1.08166	1.08706	1.07945	1.11516	1.08676	1.08265	1.10305	1.08699	1.08638	1.07953	1.13031	1.09521	1.07603	1.09848	1.12178	1.08044	1.08105	1.07603	1.15147	1.086	1.10884	1.46893	1.08813	1.09597	1.12239
HHAT	3.21784	4.39129	3.91135	4.57731	4.29744	4.1647	2.68558	4.78089	3.0676	3.18701	4.10983	3.63635	3.59985	3.42622	3.97564	2.89372	4.56381	4.31469	3.11041	2.74373	3.22774	3.83371	4.19097	3.04436	3.62326	4.34824	4.47475	3.40242	4.12268	2.38008	2.83781	3.44139	3.9774	3.40289	2.80339	2.5879	4.9598	3.08813	4.91028	4.18666	4.36916	5.40787	2.55212	7.02852	2.68462	3.23157	4.54975	5.30971	4.09385
KIF1B	5.5411	11.1675	3.80031	5.35381	4.02837	3.37838	3.04667	7.03698	3.39375	4.01346	3.68648	4.12543	4.84545	3.65527	3.43273	3.13037	6.81701	6.49485	2.95201	3.46705	2.73631	6.05474	5.67085	3.37038	5.43177	4.29338	5.65749	3.60495	4.39859	3.36145	4.05461	7.18413	3.50129	3.15848	3.52513	3.37799	3.66723	4.97179	5.10068	4.56895	4.62625	4.43244	2.84478	5.60795	3.17478	4.46405	6.58569	4.01641	4.08528
FOXC1	2.4162	2.78211	2.58361	3.66988	2.14816	2.0016	1.91869	2.91244	2.03648	1.98085	2.76294	4.69672	2.00613	3.36117	3.39952	1.8011	3.31323	3.2949	1.86948	2.79117	2.02952	2.62165	2.72164	3.16204	2.70372	2.89864	4.70494	3.14624	1.85758	2.3731	2.5086	3.1908	1.97958	1.81754	2.2826	1.71492	2.71626	2.70573	2.01646	2.52925	1.83187	1.8935	2.55127	2.46593	2.83627	2.34044	2.96713	2.00961	4.4015
TBC1D22A	9.76478	7.64107	7.62946	9.85551	6.96998	6.53984	8.30162	10.2646	11.2665	11.4377	8.4103	13.1782	13.2731	13.2688	13.0992	15.7741	8.47911	11.7505	9.2317	8.20043	8.27901	13.3943	11.1461	10.6495	11.1295	11.6908	11.28	14.9353	5.99263	9.69879	13.0683	10.0487	12.0147	12.1741	10.4541	13.794	10.2477	9.38505	8.70892	12.3563	7.10623	8.23502	4.83817	7.37529	11.3356	14.827	8.10633	13.4353	11.1403
SYNE2	1.65308	8.11459	3.3774	3.8929	3.7343	3.97591	2.00193	7.62791	2.28846	2.63547	3.17029	2.32365	3.49813	1.64182	3.39166	1.30239	3.95499	4.54369	3.92624	2.73489	1.70636	2.23266	4.92159	4.1838	8.71724	2.03566	3.06075	2.61884	6.15778	3.47736	4.83482	2.61386	3.40891	3.01721	4.6116	1.48521	2.74662	2.51053	1.4836	3.42271	1.55765	3.0642	1.53603	1.92582	2.21028	1.94605	7.55778	2.0825	6.88867
PLEKHH1	11.8333	27.5816	14.6425	16.2585	10.1827	10.5305	7.62148	19.0689	8.67065	4.5528	6.42234	7.02218	13.5167	6.73452	5.04328	14.8253	17.9881	16.4266	31.4054	14.7427	6.40355	16.2537	15.9733	6.68305	21.3652	5.94759	15.3649	14.1139	23.5085	16.7988	12.4898	13.0157	16.9987	10.6799	12.2791	7.61316	9.70606	8.84361	10.7615	9.76738	19.375	15.8207	2.88463	10.8808	9.21795	7.77368	13.4291	13.8173	12.833
ATP9A	10.0227	17.6354	6.06564	18.4898	6.33765	5.39468	4.88476	13.7182	6.57488	4.30206	5.43794	5.74382	6.39265	9.497	6.89282	3.61905	16.0505	11.894	9.11087	4.59291	3.06198	13.8567	9.13589	6.68884	12.0392	7.22814	12.5734	8.7789	7.26849	6.56108	7.11578	9.29623	6.77771	3.46138	8.07797	4.68384	14.8691	11.2356	16.456	6.6131	10.092	6.66703	4.04149	7.17177	4.87545	9.31065	10.0471	4.84837	10.8565
SPO11	1.16347	1.16347	1.16347	1.16347	1.16347	1.16347	1.16347	1.16347	1.16347	1.16347	1.16347	1.16347	1.16347	1.16347	1.16347	1.16347	1.16347	1.16347	1.16347	1.16347	1.16347	1.16347	1.16347	1.16347	1.16347	1.16347	1.16347	1.16347	1.16347	1.16347	1.16347	1.16347	1.16347	1.16347	1.16347	1.16347	1.16347	1.16347	1.16347	1.16347	1.16347	1.16347	1.16347	1.16347	1.16347	1.16347	1.16347	1.16347	1.16347
CBLN4	1.09223	1.10382	1.06805	1.07392	1.06805	1.06805	1.08856	1.08691	1.06805	1.074	1.06805	1.06805	1.08417	1.06805	1.07275	1.06805	1.27483	1.0765	1.11071	1.06805	1.07541	1.06805	1.07627	1.08081	1.06805	1.074	1.10507	1.08042	1.07384	1.07697	1.07361	1.31271	1.06805	1.06805	1.06805	1.06805	1.08159	1.07729	1.06805	1.06805	1.06805	1.07298	1.06805	1.08143	1.06805	1.06805	1.16979	1.06805	1.15266
CHRDL2	1.03785	1.05271	1.03785	1.06644	1.03785	1.03785	1.04448	1.16562	1.03785	1.04944	1.20854	1.05447	1.03785	1.06209	1.06971	1.04357	1.04204	1.05828	1.04532	1.04639	1.03785	1.04364	1.03785	1.03785	1.04273	1.04928	1.06468	1.05576	1.03785	1.03785	1.04326	1.04257	1.04235	1.06537	1.04425	1.03785	1.03785	2.48888	1.04212	1.04555	1.03785	1.04738	1.05294	1.06369	1.06979	1.04715	1.03785	1.05942	1.04265
FAM168A	6.17253	9.99656	8.61462	7.55926	6.97496	6.63812	5.87302	8.87086	7.30209	4.91871	9.34416	5.84525	7.62274	9.78298	5.96928	6.09895	7.51915	7.99746	9.30173	6.59299	5.9999	8.08925	7.51853	5.09581	7.8354	6.79069	7.70234	8.01829	8.55129	9.35033	7.45227	7.56412	8.86199	4.82229	5.91182	4.47164	7.88662	8.66869	11.5929	9.03832	9.47127	8.03919	6.92475	9.54949	5.53663	8.92663	7.24941	8.18837	7.41864
RELT	1.55409	2.53388	1.45273	2.26898	1.55792	1.59719	1.4764	2.14709	1.4879	1.5563	1.81771	1.65596	1.53816	1.57938	1.3552	1.48748	2.47928	2.50126	1.52129	1.72648	1.46175	2.19343	2.34427	1.6057	1.92801	1.56882	2.59035	2.12579	1.70263	1.60494	2.28329	2.7458	1.57461	1.50707	1.97239	1.43399	2.11123	1.81686	1.68117	1.71669	1.5379	1.63816	1.37189	1.57555	1.46823	1.8775	2.52476	1.5672	1.46729
GALC	2.76611	3.85618	5.19142	3.77833	6.44517	6.55166	2.8065	2.97559	4.92947	2.97312	6.80324	2.60847	3.72416	3.67293	5.86523	3.8106	4.08951	3.46863	4.03975	3.41987	3.44224	2.62642	3.96669	3.0091	4.23762	6.06102	3.31664	2.81966	5.59887	3.39944	2.78801	3.36996	4.24947	2.59044	2.39155	2.54811	6.01351	4.10831	7.45879	3.61326	8.33915	7.11767	3.30596	9.20883	2.36717	2.38892	3.56776	5.15993	6.24033
NOP58	6.69578	15.2406	5.43237	12.5812	9.58705	7.97158	4.56152	12.9561	3.76393	4.15218	6.39568	3.36627	3.86258	4.11481	8.66817	3.06233	14.0489	16.298	7.43813	11.3989	7.33039	4.88293	12.1728	5.02578	8.18855	5.68076	8.34471	8.92189	11.7397	6.34169	4.80904	18.6412	4.91561	3.31824	6.39936	2.83423	4.81696	6.53218	5.45431	3.95347	6.43768	7.4893	3.32592	15.9529	4.5869	5.23319	19.8457	4.12774	11.5519
SZRD1	21.482	22.8718	14.8675	16.0281	16.9247	12.0129	11.8432	27.1732	15.8896	19.941	19.5494	29.6467	22.4768	16.4016	10.4452	25.409	29.8719	25.446	8.12294	9.40005	8.07021	32.5287	29.359	11.9356	14.6665	19.3048	30.8959	11.9316	10.3424	12.0391	16.4278	27.2349	12.5456	25.2368	26.8871	22.8393	18.9068	25.9481	19.0618	25.6619	11.7476	12.1642	10.5255	22.1925	14.615	20.467	29.7184	24.086	10.5057
KCNH2	0.93215	1.05493	0.933367	1.02867	0.934357	0.9288	0.955061	1.57726	0.936108	0.938315	1.08568	0.940675	0.948135	0.962293	0.939914	0.922559	0.952169	0.953843	1.07404	0.995176	0.961531	0.944709	0.935651	0.973102	0.954452	0.925679	0.990989	0.955214	0.956127	0.936641	0.946155	0.943263	0.951864	0.927582	0.943567	0.940675	0.96549	1.04488	0.994415	0.93725	0.936945	0.932987	1.07891	0.936641	1.05044	1.54019	1.02144	0.943796	1.012
CUL1	14.6136	17.7414	8.01843	13.8857	11.4582	10.9723	4.95653	13.7035	5.06447	3.6094	11.1318	4.36015	4.65651	8.40916	6.66657	1.18658	17.4115	15.0334	9.28743	10.8917	6.32356	6.54781	12.9499	7.76917	12.9841	6.6402	15.51	10.7989	13.3519	7.42624	4.77062	19.4509	6.24711	4.68753	8.33881	1.63128	10.752	10.3544	7.90165	5.80561	9.20389	12.3417	3.38499	11.2165	4.62617	7.02453	17.5362	6.24375	13.6759
FAM114A2	3.7913	5.12944	4.52459	4.8435	5.02075	3.94808	3.41689	4.56193	3.79822	2.84476	4.62277	3.41569	3.87578	3.19473	4.45698	2.7821	4.89884	5.86512	3.90389	3.78628	3.43401	3.67759	4.97138	3.17267	6.96	4.07007	5.62528	3.5505	5.29212	3.60441	2.82199	4.9748	3.93073	3.38559	3.61062	2.36493	3.64016	4.11634	4.08895	4.23403	4.72637	5.71017	2.73408	6.23475	2.65175	4.04642	4.68384	5.00809	4.28443
CYFIP2	1.78967	2.30734	1.72881	1.93255	1.80701	1.58285	1.3897	3.06626	2.21723	1.41871	2.4318	1.46239	1.41454	2.55201	1.37028	1.39462	2.21398	2.95881	4.12462	1.55584	2.10436	1.59402	2.70022	2.01032	2.23832	1.53066	4.01325	1.4959	2.14654	1.37036	2.31501	1.95647	1.77633	1.30767	3.10719	1.48265	2.59244	2.46173	4.25924	1.69647	5.02942	2.31759	1.82885	1.83026	6.65772	3.24899	2.55209	1.45381	1.91788
TAB2	3.04941	5.2511	9.22069	7.84019	9.22545	7.01708	4.27274	4.96134	7.46777	2.06191	5.58972	3.82942	3.18561	5.52918	4.66029	1.88646	5.3525	6.65373	8.35433	6.4033	3.01722	2.48948	7.52247	2.30082	11.1091	4.6321	8.06335	3.37574	9.60025	7.32504	3.1008	4.34849	7.75069	3.53751	3.52899	2.26317	5.30994	4.52594	8.992	3.55272	11.0314	9.3373	3.20666	11.2559	3.47952	5.80673	4.37046	6.33954	13.1763
GINM1	6.60598	9.18271	8.73867	13.9985	11.6492	9.07942	6.50827	7.64216	8.15005	2.91149	7.57052	5.76758	4.23942	7.41601	4.5603	3.77886	9.32721	18.8374	14.8007	11.7755	4.73346	4.14033	11.0224	4.93331	15.1497	5.01436	16.4554	6.22333	9.99251	13.3427	5.48562	8.88385	7.02235	6.25612	7.82657	2.81125	12.5642	8.00134	8.13453	4.90235	11.7601	11.5634	4.68774	13.4697	4.61098	6.97158	7.87733	12.4046	12.9638
EIF2AK2	2.9626	6.27587	2.66664	4.87869	4.52139	4.1386	2.71554	4.74956	2.51801	2.32116	3.50216	2.75439	2.85489	4.00671	8.40501	2.06313	7.72135	5.74637	5.20674	5.07899	3.95442	2.65113	5.21081	4.19411	4.39218	4.55993	5.89316	3.27591	5.61002	5.20996	2.13752	5.94905	3.62637	2.47056	2.92414	1.77616	3.92978	3.31445	7.86338	2.95799	4.2956	5.15983	2.33445	7.62776	2.46028	3.816	7.07001	3.24197	6.12348
USP36	5.50505	6.24338	7.52831	5.82619	4.87575	5.12222	4.48736	5.12662	5.57524	11.3053	10.0715	9.34455	10.4458	5.53285	7.64467	9.42957	6.08362	5.37958	4.45346	5.2853	5.94185	5.96039	6.2989	4.02531	6.18493	8.4755	4.8129	6.92765	6.23481	5.32962	7.83547	4.57755	11.8195	9.33784	5.23449	9.21761	6.50544	6.9492	6.54081	6.14902	5.78874	5.61956	3.17718	7.62614	8.14402	9.11052	5.69477	8.46763	7.36647
KMT2C	3.60045	5.83766	3.88636	5.03679	3.78883	3.62702	2.91032	4.07029	3.34062	3.52407	3.39719	2.91843	3.99209	3.41166	4.19782	2.22456	4.33378	4.12518	3.98445	4.08843	3.70999	3.37547	4.14595	3.06401	4.60832	4.33266	3.99917	3.85056	4.97331	4.14929	3.43378	3.97419	4.23099	2.72257	2.90284	2.58184	3.25669	3.83338	3.6481	2.84866	4.68262	4.95684	2.57094	5.04387	2.94452	3.59973	3.5512	3.31556	5.84148
MCOLN3	1.62578	2.44705	2.33046	2.15664	3.27848	4.95954	1.67924	1.53117	1.98417	1.48963	2.4088	2.13979	1.54764	2.44462	1.5548	1.82449	2.67906	2.42119	2.66735	2.13901	1.59625	1.68785	1.67972	1.53669	2.47145	1.64583	2.60353	2.01661	4.96777	2.06803	1.51035	1.6099	1.91716	2.59007	1.88491	1.52653	1.49689	2.05167	2.64779	2.77571	2.99426	5.47112	1.87756	2.46273	2.06609	1.8059	2.16748	3.01741	1.98001
CCDC85A	1.15607	1.20199	1.20199	1.21982	1.22471	1.21982	1.15734	1.29256	1.1567	1.16522	1.21493	1.14676	1.22976	1.21146	1.27757	1.15592	1.25327	1.19252	1.21256	1.15355	1.14676	1.22092	1.22329	1.14676	1.20893	1.18337	1.2468	1.18495	1.20025	1.15371	1.16396	1.17706	1.2397	1.14676	1.20814	1.14676	1.16775	1.23986	1.18747	1.14676	1.23071	1.20751	1.17091	1.28088	1.14676	1.17643	1.31654	1.17438	1.47765
PUM2	8.94086	16.9991	11.8479	15.0106	16.6804	15.6159	6.03432	14.993	5.58764	5.31701	10.457	10.8855	8.16633	6.20125	16.3562	4.03074	22.9311	13.8491	14.5592	12.4701	14.386	7.01062	13.8882	7.86801	20.0734	15.0116	14.575	10.2636	23.1135	14.4726	4.51243	13.2492	18.0711	7.25622	7.36943	2.31994	6.74745	10.1362	9.41759	7.25135	12.6374	19.4732	4.54811	35.2719	3.32195	12.3276	20.9374	13.2392	24.677
MRPL43	10.6676	8.42291	8.58199	8.11405	13.0041	10.1017	10.3872	7.9456	10.692	11.1931	11.3918	12.8742	11.3587	9.0913	11.4991	13.205	9.17857	8.82912	11.1386	11.1886	13.0672	8.14831	7.88527	11.8334	9.32126	10.2333	11.0666	10.7333	9.63012	9.7138	7.74344	10.1786	9.44154	12.5293	8.40324	9.54247	4.67522	8.07143	13.4168	11.4939	10.2038	12.2217	7.8407	11.4102	10.0846	7.99915	11.8047	13.6712	11.4665
ITIH4	0.979665	1.00349	1.02026	0.989195	1.02522	0.989195	1.00349	0.969755	1.01207	0.969755	0.978903	0.969755	0.969755	0.969755	0.993007	0.969755	0.976807	0.969755	1.00806	0.98443	1.01835	0.969755	0.990148	0.969755	0.986336	0.979475	0.969755	0.969755	0.969755	0.98443	0.969755	1.00196	0.969755	1.00101	0.969755	0.969755	0.969755	0.985002	1.03475	0.976235	0.992054	0.99415	0.995484	1.00273	0.969755	0.969755	0.989957	0.999105	1.06829
ITIH1	1.04215	1.05205	1.05205	1.04215	1.04215	1.04215	1.04215	1.04215	1.04215	1.04215	1.04215	1.04215	1.04215	1.05843	1.06041	1.04215	1.05887	1.04215	1.04963	1.04215	1.05645	1.04215	1.04215	1.04215	1.05205	1.04215	1.09627	1.04215	1.04215	1.05073	1.04215	1.05161	1.06019	1.04215	1.04215	1.12597	1.04215	1.05117	1.05073	1.05777	1.04215	1.04215	1.04215	1.06811	1.04215	1.04215	1.05007	1.04215	1.05183
ZFR	6.1743	15.0648	5.47279	12.9345	8.26714	8.40088	3.6391	11.5455	3.51584	3.34539	6.53217	3.37277	5.67176	5.03456	12.6856	2.65	17.2699	12.8891	11.6254	7.84795	6.34276	4.38527	10.203	5.03807	14.7618	13.1932	10.9763	7.30327	15.1673	8.49853	3.87447	10.3277	10.1126	3.8406	4.00462	2.01027	4.93232	6.52391	5.45765	4.2968	10.2499	9.83878	2.83436	12.1756	2.28907	4.72525	12.6306	7.46232	15.8289
ZNF280C	2.05151	2.87944	2.05038	2.65775	2.42853	2.32902	1.85505	2.47522	1.78661	1.74274	2.19808	1.76553	2.00924	1.82963	3.07731	1.70707	3.10056	2.41751	2.59505	2.51617	2.65389	1.79264	2.42551	1.90466	2.07975	2.44255	2.44971	2.18528	2.90655	2.39567	1.85025	2.6088	2.45714	1.81852	1.78972	1.66264	1.84036	1.98533	2.01743	1.8269	2.43361	2.79575	1.73738	2.96011	1.75103	1.65708	2.6297	2.17276	3.07157
NPFFR2	1.06536	1.06536	1.06536	1.06536	1.06536	1.06536	1.06536	1.11544	1.06536	1.06536	1.07266	1.07297	1.0725	1.07646	1.06536	1.06536	1.06536	1.07095	1.06536	1.07126	1.07514	1.06536	1.07079	1.07382	1.07204	1.06536	1.07763	1.07359	1.06536	1.10666	1.08019	1.06536	1.07149	1.10309	1.06536	1.06536	1.0923	1.07149	1.06536	1.06536	1.06536	1.07188	1.06536	1.06536	1.07996	1.06536	1.06536	1.07126	1.07856
PHF21B	1.0661	1.12968	1.11091	1.09095	1.17086	1.10175	1.0925	1.13921	1.09413	1.1168	1.149	1.14556	1.17276	1.09068	2.27384	1.05867	1.0681	1.06529	1.0739	1.17104	1.14927	1.05867	1.08261	1.07445	1.08261	1.2963	1.06066	1.24677	1.23426	1.06583	1.06184	1.0759	1.0944	1.08969	1.07118	1.16469	1.07563	1.08606	1.48458	1.05749	1.13485	1.2436	1.16397	1.11998	1.25584	1.38727	1.08969	1.06048	1.43361
TRAF1	1.42464	4.1287	2.67358	2.38534	3.33484	2.79733	1.50387	2.64054	1.8613	1.5344	1.95949	2.25427	1.95408	2.0531	1.64697	1.45433	2.69976	2.26637	1.83892	2.7251	2.85381	2.42164	3.00208	1.98338	2.30306	2.00416	4.86676	1.82941	3.00672	2.19559	1.91397	4.20192	1.57824	0.899006	2.32703	1.35698	1.28086	2.9093	2.21812	1.26716	1.8272	8.48547	1.53013	2.33655	1.40204	1.77529	2.07502	1.38506	2.71924
RC3H2	3.02448	5.891	3.90846	4.2204	3.91456	3.77594	2.32448	4.36034	2.69793	2.12589	3.02927	2.67452	3.57527	2.6018	4.74446	2.34302	4.59718	4.28006	4.38545	4.16631	3.28449	2.82141	4.52029	2.48984	4.81732	4.54247	4.04415	3.30219	4.71015	5.16303	2.34457	4.49796	3.9056	2.92132	2.64554	2.1218	2.20224	3.94833	3.64921	2.83215	4.82907	5.29053	1.7587	4.57276	2.3574	3.20684	3.99523	3.81063	5.4127
IL17RB	1.25758	1.23319	1.41341	1.42798	1.41379	1.5776	1.05758	1.16049	1.19362	1.10742	1.38258	1.20014	1.1394	0.998221	1.79746	1.09937	1.6549	1.45497	1.1588	1.19746	1.24761	1.07199	1.13403	0.990322	1.52261	1.58557	1.2368	1.15459	1.87806	1.13994	1.04922	1.45934	1.56993	1.10773	1.11747	0.950445	1.08956	1.2233	1.23358	1.8095	1.49462	1.91717	1.04186	1.76341	0.940092	1.39255	1.48526	1.30888	1.61172
TRAF3IP2	4.93937	6.28418	13.9074	10.4967	6.20181	9.61416	8.87413	6.87464	8.3113	3.19431	7.71617	10.3912	4.82869	6.7178	4.47107	6.20281	8.46202	12.1273	14.6649	11.9002	3.68404	7.23019	12.6552	4.54379	14.5887	6.01619	11.066	8.84604	7.37042	15.1727	11.6468	6.27706	11.8635	12.6596	13.263	13.1357	14.5803	7.58252	6.45372	11.3976	4.72925	7.63649	2.93253	4.7154	8.29408	7.09585	7.1228	12.3416	5.0463
GYG2	27.6858	14.2699	49.122	20.8671	41.5398	39.1104	66.8777	18.2974	41.5852	35.858	37.2994	45.6348	73.4577	48.868	26.5165	47.9424	14.1006	41.1718	64.005	10.9458	18.0992	22.0091	10.5434	44.4373	25.4946	30.473	19.6795	32.3436	45.7227	22.5426	20.1953	7.14024	51.6888	40.7433	14.2228	47.349	11.898	19.2701	52.7051	81.6333	73.7193	48.1754	9.63754	78.5203	76.8837	49.2328	7.8249	37.4613	110.485
DCBLD2	2.48535	3.15679	3.13632	3.06008	4.63384	5.29997	2.29573	2.4145	2.41442	1.93505	4.37908	2.20322	2.25368	2.62863	3.3073	2.41243	3.01168	3.00716	2.82991	2.98209	3.72049	1.82557	2.56611	1.95227	3.05381	3.15655	2.43108	2.40577	6.09598	2.62847	1.78185	2.9329	3.15679	3.31753	2.54088	2.07469	2.36896	2.89878	3.13711	2.24558	3.66146	6.51147	2.34873	5.12209	1.83659	2.8983	3.04889	3.46026	4.932
SERPINB3	1.01266	1.01266	1.01266	1.01266	1.01266	1.06355	1.01266	1.01266	1.01266	1.01266	1.01266	1.01266	1.01266	1.01266	1.0532	1.01266	1.01266	1.01266	1.01266	1.01266	1.01266	1.01266	1.01266	1.01266	1.01266	1.01266	1.01266	1.01266	1.01266	1.01266	1.01266	1.01266	1.01266	1.01266	1.01266	1.01266	1.01266	1.01266	1.01266	1.01266	1.01266	1.01266	1.01266	1.01266	1.01266	1.01266	1.01266	1.01266	1.01266
SOAT1	3.82354	19.3455	8.57911	19.8256	10.1666	5.92396	2.23572	11.2423	4.66538	2.26246	7.74701	3.88767	2.27594	6.23872	3.18697	1.71768	15.7278	17.9766	4.91263	4.54271	3.29141	7.31486	13.1972	5.59257	10.0956	2.60419	11.7952	6.34652	5.87477	3.35109	4.71725	14.9087	4.55458	2.26805	5.03086	1.72442	11.9561	6.36997	7.69429	5.00167	13.3119	10.3945	4.42992	10.6579	4.00529	4.5316	13.0233	3.56142	5.41312
PKP2	0.980132	1.04297	1.10819	1.20719	1.17791	1.19144	1.09236	1.0442	1.09672	1.05666	1.41124	1.05077	1.08671	1.10681	1.26843	1.01675	1.07073	1.14565	1.58028	1.06369	1.07845	1.00658	1.00842	1.12401	1.24634	1.31231	1.01836	1.04297	1.70252	1.05804	1.0218	0.992593	1.13066	1.06553	1.04183	1.03434	0.995422	1.35811	1.3961	1.0601	1.51155	1.41667	1.01186	1.04825	1.04068	1.03671	1.11056	1.07807	1.26132
MSH4	1.00116	1.14681	1.02015	1.00849	1.04971	1.03774	1.00116	1.03232	1.0091	1.01593	1.0285	1.02237	1.20752	1.1255	1.24582	1.02317	1.18792	1.07966	1.12118	1.19335	1.17465	1.00859	1.03181	1.03272	1.01362	1.68308	1.01834	1.01643	1.20863	1.25456	1.01493	1.14661	1.12711	1.03644	1.01754	1.01181	1.00116	1.02407	1.00658	1.00116	1.00678	2.99998	1.0494	1.10037	1.04207	1.00116	1.08177	1.11173	1.21084
F7	6.02003	2.46379	2.83382	4.48261	3.60831	0.974678	5.27669	5.50189	1.43255	1.68198	0.783454	2.41221	4.03023	6.0297	5.43119	7.44369	3.69783	2.69311	3.64237	10.7267	12.2119	4.88098	3.70926	4.47111	6.26885	2.33001	6.34754	13.4347	1.52649	1.81827	3.54584	5.36803	7.79993	3.61662	8.27015	1.91366	16.7723	5.64192	4.04844	0.878151	5.97302	2.65951	4.02276	3.39911	8.21354	11.5846	2.9647	1.16369	3.16134
GDI2	52.1148	67.7327	32.8935	53.9216	51.9982	39.7337	31.0559	65.6669	27.7306	19.4166	32.9355	19.23	31.4605	23.5974	46.078	23.5637	54.8186	75.0861	56.3902	45.2481	23.079	35.4639	66.9784	32.1506	52.1607	57.8625	52.4339	44.1668	46.0549	58.806	21.0299	70.1159	39.7921	30.9772	35.4962	4.30473	24.5667	52.5241	35.4878	33.3481	53.8092	61.3482	11.4565	44.3671	8.608	22.6997	62.4716	39.2324	38.6449
PRDM1	1.28308	1.43992	1.17396	1.29179	1.18158	1.27573	1.11889	1.49171	1.21496	1.13223	1.35048	1.22983	1.17232	1.33669	1.26476	1.1159	1.41388	1.59113	1.26031	1.13504	1.21641	1.22983	1.58796	1.19337	1.18103	1.27619	4.24623	1.18702	1.1843	1.16888	1.25369	1.74861	1.20933	1.13776	1.20779	1.12452	1.3093	1.32481	1.33887	1.31419	1.17269	1.17659	1.20625	1.53399	1.3171	1.20561	1.36989	1.22484	1.37969
ATG5	2.56288	3.41432	3.22752	4.77486	4.13299	4.1408	2.5896	3.19957	2.89298	1.82711	3.14037	2.49085	2.01309	3.00496	2.99493	1.90135	3.7339	4.49746	5.23602	4.36476	2.43996	1.99344	4.26972	2.16576	4.7557	3.10395	4.41927	2.48929	4.76097	4.45462	2.1559	3.55401	2.99699	2.61615	2.4814	1.86263	3.26839	2.69837	3.76367	2.51511	4.77963	5.19327	2.24995	4.6397	2.24379	2.61574	3.73982	3.67092	5.3799
TMCC3	1.8303	1.73422	1.56861	1.80907	1.67431	1.49008	1.42639	1.92511	1.85944	1.72163	1.85917	1.79036	1.72577	1.81869	3.11418	1.44141	1.72595	2.20776	1.62222	1.77003	3.13406	1.63977	1.64876	1.79521	2.44381	1.7443	2.49203	1.59794	1.51203	3.06371	1.52696	1.86349	1.66073	1.37925	1.59236	1.46408	1.47793	1.70768	2.00428	2.23907	2.37409	1.83354	1.6583	1.7989	1.80574	2.3239	1.62393	1.4675	4.26987
PITHD1	18.0974	20.2518	18.5701	11.4338	24.8064	14.1019	12.7056	25.1618	16.5914	17.9858	18.197	20.6281	24.9057	12.1302	20.6743	13.7157	20.6672	20.3093	6.65974	8.74324	9.53672	27.6528	20.6591	6.50031	14.8638	31.1641	24.7115	7.89073	13.4965	9.77936	7.446	27.5677	10.5066	18.2566	16.5403	18.1369	9.98823	17.6548	18.1754	28.8512	12.0035	21.161	10.8969	21.2758	6.80928	12.8616	17.7127	27.2813	11.4047
MTA3	5.42027	4.76431	3.96075	4.6765	5.22505	3.92235	4.03646	4.79529	3.54488	3.05783	3.60436	5.39888	4.50782	4.60539	8.45162	3.16937	5.64639	4.47137	5.25089	4.89192	6.20985	4.22676	4.01281	4.15401	5.46936	5.84839	5.476	6.06584	4.26102	5.00908	3.65798	4.414	6.24638	4.33103	4.26305	3.36606	3.87715	5.36727	4.9169	5.20913	5.27509	6.07646	3.51811	9.02382	4.6228	6.65468	6.88486	5.43791	6.59653
USP13	3.75574	4.09411	3.46428	3.67585	5.00586	4.03716	3.05409	3.46762	2.95071	3.35722	3.9634	3.38823	4.17799	2.97397	5.23719	2.75733	3.94226	3.79515	3.3037	3.04389	3.93239	2.94622	3.34245	3.68002	6.80978	5.68907	3.17845	3.40079	4.58173	3.09359	2.72575	3.46354	3.92937	3.08649	2.83591	2.54428	3.33862	3.46762	3.68418	3.09383	4.08228	4.65508	2.73342	4.78205	2.62156	3.97719	3.56195	3.75639	5.34204
ATP11B	2.25438	3.73653	2.57959	3.05728	3.79813	3.86328	2.30863	2.77349	2.33336	2.00776	2.66398	2.07894	2.5343	2.18335	3.2222	1.91464	2.80418	3.10388	2.62967	2.7442	2.63276	1.86595	2.89885	1.84214	3.70075	3.39633	3.46828	2.42587	5.98449	2.67024	1.70156	2.78887	3.11857	2.03103	1.85389	1.60009	2.34233	2.3162	2.88826	1.99192	3.98987	5.12788	1.69878	4.8012	1.71733	2.70023	2.89228	2.89939	5.60642
LAMC2	1.17572	1.17788	1.17259	1.32811	1.28821	1.23053	1.2432	1.19211	1.18257	1.18187	1.21241	1.17554	1.17537	1.18127	1.20174	1.17259	1.18812	1.18569	1.2046	1.17719	1.17259	1.17259	1.17901	1.17259	1.19332	1.20313	1.22273	1.17259	1.17554	1.17485	1.18699	1.20295	1.30149	1.1824	1.18283	1.19029	1.25647	1.3256	1.18621	1.17875	1.17494	1.17511	1.17259	1.17945	1.17259	1.21709	1.18101	1.17953	1.18031
CDK14	1.80278	2.11847	1.50242	1.93571	2.38944	1.45545	1.77122	1.66777	1.76154	1.338	1.61809	1.59248	1.55	1.8311	1.59	1.50628	1.74429	2.04001	2.27825	1.51735	1.38651	1.50342	2.19925	1.71852	1.78313	2.03715	2.07174	1.74065	1.88805	3.29859	1.55991	2.22424	1.96891	1.35239	1.64378	1.41839	1.48942	1.85486	2.1423	1.3291	4.30345	4.03481	1.56857	1.59627	2.17937	1.36152	1.69531	1.43967	4.43251
SEC61A1	37.9284	35.1584	43.9099	32.2177	28.9377	28.0546	21.1417	43.9953	39.5447	38.7724	62.3772	46.4149	40.8582	31.1354	37.9854	42.8442	47.2297	33.8237	21.4861	13.5968	25.9272	45.4854	33.6231	26.01	29.2579	33.6661	43.3838	26.6606	22.6907	15.8399	30.7539	37.9345	39.9907	39.8189	24.4102	51.6826	34.7946	30.8218	42.3269	38.4545	33.0212	25.1724	15.6285	26.5709	26.1371	34.4653	55.192	40.4221	40.442
PPP1R12A	2.89927	6.26704	2.94352	4.59539	4.07114	3.74705	2.50883	4.23111	2.60038	2.6353	3.02024	2.62916	2.94671	2.70245	3.83764	2.36169	6.17924	4.5111	3.88812	3.80223	3.25741	2.72007	4.77993	2.92183	4.94197	3.73692	4.09945	3.07271	5.34541	3.66667	2.69049	5.47922	3.27782	2.5794	2.81035	2.37366	2.65149	3.32112	2.99305	2.55261	3.34449	5.21064	2.56577	6.21975	2.35954	2.94719	5.70586	2.92407	5.66392
RASGRF1	1.04436	1.33283	1.08889	1.37414	1.04774	1.04329	1.00214	1.15733	1.23435	1.00505	1.0777	1.00106	1.00244	1.10966	1.00014	0.995776	1.17312	1.05073	1.00421	1.17687	1.02773	1.06636	1.11579	1.03724	1.03471	1.01777	1.08023	1.05885	1.00474	1.03295	1.06483	1.13365	1.09019	1.0075	1.14131	1.05425	2.51061	1.17204	1.06092	1.00559	1.00137	1.01103	1.02229	1.09288	1.03662	1.12629	1.38249	1.02068	1.02965
CAMK2B	0.966532	1.09329	1.10829	1.08567	1.04796	1.15224	0.98192	1.40827	0.961733	0.966152	1.13533	1.0635	1.13008	1.01285	0.991594	1.41436	0.996012	0.988318	1.45557	1.04796	0.983367	0.94368	0.983748	0.995098	1.03197	0.990299	0.948784	1.00927	1.00614	0.98649	0.982453	0.957392	1.3279	1.13495	1.01757	1.01513	0.963562	1.04987	1.15232	1.66398	0.977273	1.04263	1.20031	0.99068	0.985881	1.3244	1.03814	1.29241	1.11522
CROCC	4.90532	5.31479	6.00191	2.65243	6.7641	3.90692	3.2152	4.70504	3.81212	3.81895	5.20079	6.3409	3.71593	4.68877	1.21717	2.63716	7.25256	4.66889	1.67269	3.18073	2.53614	6.07691	5.31502	3.14611	4.12609	2.62864	3.48664	3.60539	4.09469	3.41102	3.51289	5.36606	2.81433	4.14351	8.70233	4.08555	2.54251	4.00111	4.29796	4.30019	2.8554	5.84815	2.37439	4.77697	2.89056	6.48714	5.84116	3.54229	3.37702
POLR3E	2.39845	3.96888	2.55006	3.71606	2.84508	2.70806	2.16418	3.19788	2.60572	2.44658	2.98871	2.79337	2.53151	1.69786	3.24312	2.04351	4.38053	3.34174	2.93214	2.42704	2.28941	3.12344	3.22252	2.08412	3.83901	3.03205	4.19584	2.5585	3.37816	2.52892	2.49965	3.33779	2.88439	2.57416	2.32614	1.40444	2.80189	2.49091	2.59165	2.88173	3.29049	3.27331	0.798589	2.93373	2.08647	2.70882	4.29203	2.20053	3.76305
ATP2B4	10.7915	27.571	11.2731	21.5653	10.0706	8.5718	5.86779	21.4469	12.1111	13.2973	18.9914	15.7349	19.1396	12.1748	10.6868	4.32919	9.68539	19.6015	12.1764	2.29405	10.6319	21.7133	14.9888	5.97271	17.3808	25.9415	20.9592	12.543	5.86825	9.12335	5.15913	17.2673	25.109	5.67956	5.35163	4.0326	7.82936	12.2954	15.3227	18.3052	12.3388	9.67033	4.97386	40.7096	5.24336	12.1478	8.05472	17.5498	14.9635
RIOK2	4.35174	6.25165	3.21868	5.4507	4.23796	3.52998	3.68814	6.51159	2.61905	2.6825	3.43235	2.32009	3.34118	2.61568	6.34204	2.7911	6.04585	6.0537	4.64388	6.00476	4.70284	3.56486	5.416	3.70713	5.76053	5.04703	4.98159	4.20818	4.90088	5.41574	2.54524	6.29715	4.09932	3.06804	3.77965	2.15909	4.00065	4.4234	3.80028	3.19244	3.95187	4.44532	2.48973	4.38109	2.54593	2.45736	6.63141	4.17442	3.56452
YIPF1	10.4943	13.2605	16.0824	7.2314	12.3179	12.8437	11.9296	14.8666	16.4898	8.40618	20.8714	14.2771	10.8826	9.19891	5.8528	10.8225	11.0072	14.6926	5.60559	5.79863	4.23493	15.928	15.6283	7.33888	8.40137	8.77806	15.4607	6.61154	11.1301	5.66846	7.69182	18.0236	6.77097	12.8165	11.6733	11.9169	11.0293	11.7174	20.4846	16.2882	13.4153	13.1496	9.23925	11.917	5.92644	8.43559	15.3876	15.7886	6.60451
NDC1	5.53617	7.06094	3.65503	4.7383	4.44005	4.46033	3.12075	7.55405	2.60589	2.99113	4.09784	3.26306	3.4799	2.89207	4.79085	2.83581	8.07472	6.44818	3.36057	3.82428	2.94949	4.1774	5.55467	2.65333	4.73505	5.22275	5.2438	3.67245	5.64567	3.3937	2.82606	6.58059	2.66865	2.86986	3.27196	2.11626	3.32366	4.62532	3.87528	3.05582	5.21114	4.59537	2.25029	4.43657	2.10388	3.03469	9.64746	3.26515	3.4474
DGKG	1.32247	1.05083	0.966096	1.24659	1.14215	1.0818	1.14508	1.08464	0.97194	0.931786	1.08973	0.933039	0.952072	1.58977	1.20326	0.989888	1.07921	1.20844	1.12387	0.928948	1.16937	1.009	1.05225	1.21595	1.13957	1.02779	1.31329	1.20485	1.17221	0.94122	0.978869	1.31671	1.04549	0.95274	1.14199	1.02078	0.964343	1.04991	1.12371	1.15234	1.82385	1.09566	1.00433	0.9494	1.08931	0.961839	1.29868	0.985046	1.28541
FLYWCH1	9.68557	10.0498	18.3746	13.3793	12.457	10.4677	12.026	12.0514	21.8797	14.6844	18.3648	31.5812	16.4327	12.3112	12.5119	26.9584	7.26216	11.7272	10.2394	10.6055	9.25965	19.4955	12.4861	7.73493	7.67038	9.01549	22.8098	23.8362	6.75522	11.2022	22.5505	12.5283	19.6349	18.2266	11.4188	18.6088	13.0334	10.8132	22.4759	24.1202	18.5322	25.3873	12.0198	10.2688	10.0735	14.724	8.85564	23.4808	17.4864
UNKL	2.47346	4.73327	3.2194	3.32087	2.71467	3.12873	2.30657	3.04322	2.5758	2.27624	2.81439	3.20606	2.60685	2.31641	3.36279	2.06941	3.25688	3.00018	3.26585	2.7292	2.71062	2.65496	3.07879	2.37342	3.51111	2.68775	3.5142	2.58398	4.01242	2.78383	2.77724	3.28062	2.86465	2.63226	2.2074	2.23058	2.19597	2.5839	3.57915	2.76771	2.91531	3.54326	1.95039	3.97534	2.47815	3.12428	2.89705	2.95207	5.26134
TBXAS1	1.75172	1.89186	1.45134	1.46597	1.50734	1.53408	1.33772	2.33034	1.70214	1.42749	2.71454	1.52611	1.4131	2.00486	1.46573	1.2628	1.47301	2.86031	1.14174	1.17983	1.55269	1.41138	2.23219	1.18053	1.5473	1.61901	5.18519	1.43586	1.1577	1.28352	1.80474	3.24421	1.14268	1.17983	1.9394	1.16692	2.36725	2.57175	1.68595	1.56552	1.32653	1.30855	1.66319	2.72909	1.65428	2.23212	1.7403	1.33881	1.54096
PARP12	3.70923	5.94625	2.62034	5.65974	4.04225	3.14894	3.06051	6.28557	4.11908	2.57625	3.77832	2.77134	2.74731	6.56393	6.79917	3.0676	4.23275	4.8589	4.41817	4.2604	3.24157	3.84845	8.16199	5.28762	3.77437	2.97086	10.2078	3.04172	3.40014	3.51559	3.7114	10.4078	3.03342	2.58898	3.36121	3.24754	5.3305	4.38939	16.4506	3.61144	4.83649	4.09844	3.24609	4.43969	4.4771	3.60733	5.37718	2.47975	3.32686
ALDH18A1	12.1954	11.4486	19.9006	10.1041	13.1535	18.6294	9.67324	13.3203	13.6121	11.7592	20.1544	13.0877	11.9357	12.931	11.0994	10.4189	20.6417	15.4436	12.9454	5.77477	10.3833	13.8253	14.288	11.1817	9.68197	19.8124	10.914	9.98059	19.8494	6.26244	9.39138	10.6884	10.9619	11.5454	8.96734	13.1505	8.35432	9.74575	18.5203	20.0899	13.3496	11.9399	6.44958	7.87232	11.9585	13.0652	22.4243	14.066	12.2362
TARBP1	4.79372	9.6866	4.80108	9.41386	8.04625	7.87897	4.43006	6.05014	3.90894	5.85732	4.67209	4.13325	5.49846	7.54471	8.27513	3.92628	9.4168	7.68375	7.6552	7.85429	8.60413	3.93564	5.89423	4.80649	6.81669	8.81637	6.67819	5.70303	6.03389	6.3731	4.58853	8.81118	5.42789	4.29744	4.98105	2.93247	5.00032	5.46418	4.82661	5.105	5.64137	19.666	4.11886	11.2396	3.0107	4.7781	7.84268	4.92859	11.2378
MXD1	1.99326	2.35641	2.20834	2.62326	2.32184	2.47936	1.97248	2.39166	2.0675	1.95545	2.41039	2.31852	2.2533	2.25806	2.6293	1.82713	2.21174	2.67086	2.67418	1.94804	2.50465	1.86009	2.24733	1.82901	2.04596	2.74417	2.49758	1.88486	2.56383	2.4877	1.82441	2.21064	2.18526	2.04996	1.81726	1.82884	1.97836	2.10642	2.14908	2.13196	2.73293	3.07565	1.86375	3.52897	2.25355	2.06589	2.54058	2.27697	3.55724
CDK17	4.31124	8.64564	4.13688	6.91979	4.56373	4.42448	3.38447	6.00702	3.13818	2.94163	4.29288	3.20788	4.23381	3.45111	5.49808	2.7818	6.11047	6.24275	4.63817	5.61238	4.30757	3.4658	5.77979	3.71362	7.23647	5.19861	6.58697	5.25799	5.64061	5.69402	3.38899	6.825	4.75715	3.30398	3.48057	2.48815	3.40498	4.68676	5.12134	3.26427	6.55844	5.29823	2.89151	6.60771	2.85808	3.77399	5.2016	3.7632	6.56257
SLC2A3	2.13231	5.42046	2.26703	3.55317	1.98316	1.93567	1.80184	3.66729	2.0885	1.96831	4.80444	1.81293	1.85363	1.94605	1.86074	1.66713	3.18662	2.75392	1.84621	2.58976	2.16192	2.06193	6.15044	2.45664	1.98587	1.90838	4.15826	2.0466	2.13942	3.37975	4.16735	3.80799	1.71166	1.73241	2.52807	2.292	3.76098	3.4582	3.68932	2.11627	2.19105	1.76369	2.40828	2.33414	2.23263	1.99776	4.80979	2.7955	1.87119
PSD	0.965556	1.28341	1.11767	1.05197	1.2624	1.05494	1.90077	1.68143	1.07511	1.25303	1.76898	1.1852	1.07694	1.0592	1.86795	1.09529	1.18558	0.94599	1.05159	1.01877	2.08455	0.971266	0.957562	1.03133	0.970124	1.01892	1.03567	1.22068	1.11683	0.952918	0.972027	1.04359	1.06651	0.997836	0.968373	1.01055	0.973398	0.976519	5.38717	1.02905	3.78938	1.09483	1.87526	1.26689	1.37454	3.28478	1.87549	1.02189	1.44961
CTDP1	5.33865	6.58824	8.55666	7.16088	6.15388	5.73216	5.73355	7.28854	8.18454	8.35428	7.44844	11.3701	9.29911	6.9964	8.53449	7.80994	6.77171	7.3824	5.36802	5.00551	6.00933	9.39987	7.64213	5.3657	9.23928	7.75599	10.7491	8.51837	4.51054	6.14505	8.3156	7.53687	9.59	9.11922	6.95346	3.95868	5.73588	7.27234	7.99317	11.6248	5.58272	6.21318	3.502	6.75202	8.21477	8.34862	6.30441	9.15456	5.97616
YBX3	10.4366	13.9591	20.5592	16.9062	12.6343	19.1052	5.96192	12.8686	23.023	15.573	21.9176	9.9029	9.77678	15.8556	22.1928	12.9846	13.0324	18.5078	16.837	18.706	14.9292	9.18683	24.907	13.7774	23.6995	14.5602	7.99322	12.6225	25.9734	14.2398	19.6418	13.752	11.9571	12.2243	20.9295	9.44835	10.9722	14.9126	22.7071	10.6824	13.7267	16.5829	13.2127	9.45078	8.94524	12.9937	15.1954	11.0384	9.47933
STYK1	1.1915	1.19836	1.1915	1.19939	1.1915	1.19939	1.20978	1.21675	1.1915	1.1995	1.21367	1.1915	1.1915	1.1915	1.19779	1.1915	1.20304	1.19722	1.2019	1.19744	1.20133	1.1995	1.20258	1.1915	1.1915	1.1915	1.30906	1.19973	1.1915	1.19744	1.1915	1.21115	1.1915	1.1915	1.20041	1.20304	1.1915	1.19767	1.2091	1.1915	1.1915	1.19813	1.1915	1.1915	1.1915	1.1915	1.20236	1.1915	1.19813
WNK1	7.21466	14.3806	5.62301	12.2586	5.28158	4.63724	1.96031	11.6044	4.57495	5.83595	5.47327	5.02522	7.54737	4.8469	6.66908	4.35459	10.2199	9.55857	8.1992	6.89815	4.40718	6.43947	8.98937	5.80247	10.1522	7.52383	8.76703	9.35862	5.78611	7.25418	7.85441	8.46282	8.6935	3.93168	4.25782	3.06661	5.43597	7.8327	6.55748	5.89343	7.45107	5.92713	2.32367	7.57107	5.11526	8.23138	8.68501	5.65656	9.08973
CCAR1	3.3109	13.5787	3.94226	7.14994	6.94013	5.55297	2.68443	7.27275	2.85152	2.49591	4.16123	2.28766	3.54292	2.67092	4.95913	2.29302	10.1881	8.18436	5.61395	6.71588	4.54674	3.42283	7.16338	3.38609	4.85932	5.07425	5.60665	4.22586	10.5784	5.80869	3.26026	12.6687	3.99415	2.35959	3.36652	2.18598	2.39641	3.94793	3.09216	2.33108	3.95725	10.2525	2.38926	6.71161	2.52667	3.19897	12.168	3.38741	8.39619
OGFR	6.52597	7.32634	8.2229	9.32486	8.4544	5.14349	11.7201	9.61207	11.0392	9.0251	9.72425	10.2471	9.39617	14.7601	9.10713	9.9884	7.24856	8.12655	6.93821	11.0664	9.09724	15.1061	17.134	13.9982	9.8435	7.0032	16.1228	11.2131	4.58086	11.8092	12.5162	15.6212	11.6374	7.83196	13.4383	12.8749	18.2368	11.3392	49.5055	8.16795	8.37039	7.98409	12.5827	5.59508	16.8302	18.6678	6.92193	7.36911	8.40463
GNA15	1.38753	1.69459	1.60701	1.34781	1.42256	1.38585	1.27421	2.03996	1.67177	1.42177	2.85074	1.50643	1.25837	1.5795	1.12532	1.21883	1.252	1.60807	1.26908	1.05915	1.2881	1.56331	2.2866	1.17955	1.17486	1.44061	3.41559	1.09312	1.25731	1.11701	1.35577	2.50652	1.14664	1.12046	1.65036	1.32879	1.71812	1.68053	1.98953	1.65797	1.28367	1.31703	1.58808	1.81137	2.14099	1.40726	1.68964	1.44132	1.41142
CREB3L3	1.24249	1.24249	1.24249	1.26191	1.24249	1.24249	1.24249	1.30442	1.24249	1.24249	1.26062	1.24249	1.24249	1.24249	1.24249	1.24249	1.24249	1.27033	1.24249	1.24249	1.24249	1.24249	1.24249	1.24249	1.24249	1.24249	1.2576	1.24249	1.24249	1.24249	1.24249	1.32275	1.24249	1.24249	1.24249	1.27076	1.24249	1.24249	1.24249	1.24249	1.24249	1.24249	1.24249	1.24249	1.24249	1.24249	1.24249	1.24249	1.24249
PIGV	6.05637	7.13005	6.40925	4.57187	4.94325	5.58643	4.93997	6.68509	5.05165	4.17114	5.98152	5.53639	6.56996	3.43436	3.86427	5.66372	6.7062	6.42607	4.33522	4.28476	3.44991	6.98557	5.98144	4.77429	5.51814	4.94955	5.78532	5.0133	5.66817	4.879	4.67523	6.61478	4.09613	5.32102	5.01078	4.20848	5.73234	5.5448	6.68761	4.64672	4.97209	5.47105	3.30922	4.95586	3.6869	4.51065	6.27057	6.16208	3.58708
PTPRU	2.14196	10.913	15.3603	7.021	1.8172	1.94694	1.2449	11.4041	5.73319	0.161481	4.09444	1.91262	1.61289	3.43958	0.440819	4.91184	15.6879	11.943	6.48872	2.52022	0.136674	25.7184	9.70549	4.4861	4.04825	1.63838	10.7229	5.13761	0.250434	2.87276	6.88973	7.99103	2.57783	1.65519	8.58296	24.8415	6.87033	11.0332	11.849	12.1866	8.23697	0.821286	1.37707	-0.133153	6.59921	1.12262	19.3268	8.87669	0.579005
SNRNP40	6.37506	7.81081	4.33575	5.11906	4.9773	4.79342	3.4261	9.78215	3.69755	3.38725	4.86979	4.46241	5.41581	3.05873	3.81798	4.63788	8.6996	7.02711	3.17605	3.14366	2.88988	4.45953	7.88188	2.79794	4.00178	7.06035	7.13812	3.92899	5.38934	7.53888	3.19886	9.63541	3.01856	4.32057	3.85745	3.2103	4.45237	5.91544	5.79836	5.51663	5.53874	6.05658	1.49344	5.77726	2.09731	3.24751	11.1369	5.71553	4.49479
RIMBP2	1.03409	1.04945	1.15026	1.13269	1.04732	1.03409	1.03442	1.1371	1.05174	1.03613	1.19372	1.12175	1.04667	1.13465	1.03687	1.03809	1.03352	1.06374	1.07698	1.10312	1.04961	1.03205	1.28513	1.04945	1.04749	1.03605	1.07935	1.09103	1.03793	1.16398	1.04536	1.0421	1.051	1.03532	1.05459	1.11399	1.03899	1.22778	1.71981	1.03474	1.07061	1.07902	1.0559	1.06391	1.06954	1.08106	1.03205	1.04422	1.67194
COL11A1	1.50251	1.48143	1.73536	1.65483	2.65628	2.83836	2.52687	1.51615	2.02842	3.61614	12.7468	13.9003	6.89172	1.50028	6.05465	1.72577	1.35045	2.09399	1.6349	1.37997	5.43217	1.93448	1.45124	1.39708	6.83797	11.3515	1.78151	1.34548	5.80807	1.82996	1.3798	1.375	2.53886	2.33197	1.54964	1.87271	1.40047	2.22687	1.50491	13.9871	1.40725	2.66984	1.56924	7.99199	1.75215	2.30667	1.35433	7.77377	2.09994
QSER1	2.92119	3.81463	3.51208	3.67508	4.43892	4.18423	2.46615	3.29585	2.89466	2.83164	3.52906	2.3987	3.2104	3.367	4.4931	2.34247	3.85925	3.6183	3.4801	3.53751	3.38051	2.37217	3.57052	2.45841	4.10431	4.57247	3.01944	3.03547	6.42283	3.24365	2.20261	3.15117	3.24854	2.62844	2.48265	2.1786	2.82366	3.46714	3.18394	2.56478	4.63328	4.90692	2.28569	5.07451	2.23128	3.64365	3.53767	2.91488	6.12273
MPC1	8.79711	17.0723	33.1182	50.5412	32.1536	21.4182	11.7279	14.085	14.5885	2.12192	24.1458	16.2502	5.11496	20.3527	8.58759	2.74364	15.1571	32.0487	19.2643	35.0451	7.17195	6.10052	19.4841	8.9013	17.4802	15.4868	32.57	11.7017	25.7806	27.6818	13.9745	15.5764	16.5659	14.3314	13.3814	3.76822	30.131	13.5599	16.6145	14.0491	20.9298	29.2597	10.2097	21.9007	6.18722	4.75911	14.412	20.6332	20.9491
ACAA1	5.74733	3.5823	7.62416	4.13736	7.21982	7.74159	5.65248	4.78013	7.3988	5.18114	8.33709	7.00063	4.67188	5.45595	4.95083	6.89328	4.63144	5.56567	7.21024	4.56817	4.05615	4.62007	4.6597	3.24633	5.24603	5.06436	5.03017	4.2902	6.76765	3.56159	4.14199	4.62372	4.45708	6.33399	4.75065	4.92355	7.23509	3.88382	7.65323	6.77723	7.40465	7.67297	4.08831	5.20559	3.76648	5.64736	4.57735	6.71267	6.29517
BCAT1	2.99468	3.28679	1.58236	2.17762	1.67007	1.55571	1.56319	4.57306	1.52214	1.51326	1.99294	1.54393	1.51157	2.10908	1.61162	1.49923	3.50298	2.25972	1.58329	1.53233	1.64762	1.64996	2.19155	1.71551	1.69877	1.62425	3.66203	3.91684	1.51784	2.42214	1.6969	3.32438	1.59264	1.52663	2.09159	1.51372	1.6696	2.36772	2.06737	1.56104	1.58722	1.59171	1.73159	1.62724	1.74113	2.18491	5.759	1.55777	1.64725
HDAC7	3.76187	7.86357	4.47008	4.56197	3.98844	5.59108	4.72074	4.86083	3.75105	4.55679	4.68986	4.57273	6.43426	4.32344	2.97115	6.54484	5.76006	4.50798	13.2009	5.80506	6.8321	5.35239	9.18344	4.22346	4.97255	5.42095	6.2029	5.32265	4.02069	8.92371	7.42592	5.36062	7.63578	4.26213	6.69384	10.7643	3.03651	7.84046	6.06479	3.48971	2.97634	6.0458	2.4134	3.08379	7.56685	4.61917	5.77005	5.97542	5.47745
LZTS1	8.92443	13.5764	35.5041	21.2235	17.9188	9.53783	5.17505	20.5642	42.3237	20.6979	22.3142	39.4522	17.8051	53.1176	3.02773	4.12595	10.6305	12.7177	-1.89195	9.08274	10.9607	33.3268	23.3375	4.90991	40.9438	14.5174	21.7459	19.4265	0.211045	3.23615	33.1439	14.9138	31.3638	15.4281	20.8215	15.9727	78.9364	55.0644	47.5374	51.8741	24.311	17.4449	12.9624	42.1012	16.4943	36.9023	13.1365	16.1738	16.9076
PRDM6	0.965875	1.06062	0.969611	1.05773	0.98659	0.996438	0.965875	1.01257	0.975384	0.965875	0.99457	0.97861	0.96978	0.965875	0.972837	0.965875	1.01053	1.14144	0.977421	1.02174	0.971309	0.979289	1.02089	0.989476	0.995759	0.97029	0.989816	0.993382	0.965875	0.985571	0.96995	1.11461	0.969271	0.972837	0.980647	0.965875	0.970969	1.00357	0.998306	0.968762	0.996098	1.00595	0.977421	0.970799	0.974025	0.973006	1.0866	0.965875	0.969611
WNT8A	1.05291	1.05291	1.05291	1.0785	1.10131	1.05291	1.05291	1.05291	1.05291	1.05291	1.05291	1.05291	1.05291	1.05291	1.05291	1.05291	1.05291	1.05291	1.05291	1.05291	1.08468	1.05291	1.05291	1.05291	1.05291	1.05291	1.05291	1.05291	1.05291	1.05291	1.05291	1.05291	1.05291	1.05291	1.05291	1.05291	1.05291	1.05291	1.05291	1.05291	1.05291	1.05291	1.05291	1.05291	1.05291	1.05291	1.05291	1.05291	1.05291
SPAG4	0.957916	2.12266	1.0959	2.68894	1.93753	1.35051	2.61627	1.21119	1.45339	1.52012	2.24805	1.70029	2.37611	1.90332	1.14801	2.42645	1.32596	1.09838	1.78466	2.56026	1.40829	1.18514	2.78563	3.41829	1.32179	1.12674	3.73059	1.96589	1.39233	1.4767	1.83996	1.458	2.08508	1.35272	1.29069	3.44594	3.2772	1.2984	2.71517	1.48875	1.4121	1.53608	1.19108	2.45144	3.22323	3.16457	1.67078	2.08349	1.32463
NCKAP1	4.49957	10.9427	4.23377	9.4521	6.05036	5.73579	3.59005	7.09378	3.69765	2.89464	5.0722	4.07487	4.14397	3.40907	6.1963	2.47823	7.87324	7.94939	6.3677	5.88901	3.78791	3.6886	6.46908	3.98814	8.18306	6.8957	7.49478	5.42673	7.36832	5.94584	2.95615	7.2141	5.60565	3.21244	3.35638	2.01419	4.6834	5.75987	5.40434	3.67142	8.10683	6.50075	2.80699	10.328	2.43007	5.83418	7.18067	4.9972	8.14748
MRPS35	13.5774	16.5934	7.34979	17.2128	14.112	12.1472	4.56267	17.3714	5.6022	5.11486	7.63752	7.13562	7.44746	7.84087	21.6868	5.8916	19.7123	20.028	26.7246	17.9104	11.6143	8.8604	15.6836	8.79471	20.8961	14.7912	12.4642	12.2537	18.9639	17.613	5.39527	19.2661	11.9767	8.62158	8.5439	3.314	7.08266	13.2797	10.8512	7.93899	11.8728	17.1892	4.10898	15.5438	6.08541	7.33171	25.0201	13.0156	16.4007
SFSWAP	4.35128	7.62636	6.18748	6.80819	7.1911	5.75818	5.42498	5.05949	5.85498	5.1854	5.32587	5.26624	7.23578	5.10038	7.68629	5.06662	6.77799	5.53409	5.80433	7.1434	8.4309	4.12796	5.49839	4.94342	6.72921	6.59362	5.23504	5.43412	6.91017	8.01717	4.45125	6.7162	7.68544	5.37279	5.62933	4.64398	3.34464	5.55244	6.31037	4.39875	4.74983	9.0932	4.76958	4.42562	4.75162	5.43908	5.37845	6.38656	9.62726
TNK2	2.1498	2.67338	8.28275	2.19145	5.7674	6.50543	4.38571	2.31504	6.70592	5.23031	5.3639	6.05959	5.87268	5.61085	3.05155	6.38054	2.56199	2.8683	3.14386	2.72266	4.81758	3.92934	3.30147	2.35525	2.81734	3.61846	3.59237	3.78286	3.27195	4.42805	3.70253	2.57519	7.40908	5.7413	3.55788	8.80816	5.14853	2.85251	5.41974	7.76581	3.77653	7.16541	4.4462	5.95293	4.21169	8.03596	2.92674	7.06211	7.33516
MON2	2.51566	4.85446	2.61098	3.98595	3.21756	3.0241	2.07846	3.23597	2.19565	2.09782	2.47749	2.18282	2.61176	2.25791	3.11666	1.99881	3.80776	3.54552	3.10981	3.43037	3.39079	2.29167	3.50333	2.2265	3.87797	3.11894	3.54198	2.62318	3.92378	2.86952	2.17353	3.7799	2.75894	2.08893	2.45136	1.9201	2.30403	2.92391	2.6486	2.25948	3.03221	4.56247	2.13796	2.83387	1.97677	2.46435	3.24132	2.50433	4.70162
CDH3	1.54402	1.35691	2.94859	2.36608	3.65009	1.86191	1.14391	2.70021	2.08925	1.24451	2.3561	2.48705	2.9899	1.88145	8.49818	1.20081	3.54899	5.0234	1.51004	1.33605	2.83767	2.59342	1.81342	1.42956	3.1361	2.22993	1.46526	2.21798	1.13962	1.31263	1.61782	1.71784	4.66321	1.74102	3.59517	1.3828	5.52197	2.066	4.59922	3.17544	1.49578	1.63002	1.95509	3.05372	2.23249	4.23161	6.58102	1.83873	2.04266
ARSF	1.04878	1.08081	1.05675	1.06728	1.05752	1.04878	1.04878	1.05863	1.0588	1.04878	1.09194	1.05778	1.04878	1.06189	1.04878	1.04878	1.07576	1.08184	1.04878	1.04878	1.04878	1.10513	1.04878	1.09871	1.04878	1.07661	1.06326	1.06814	1.05786	1.06274	1.09245	1.06411	1.04878	1.04878	1.04878	1.04878	1.06993	1.07053	1.06249	1.05504	1.10547	1.04878	1.06094	1.04878	1.10042	1.06377	1.04878	1.04878	1.06437
GPBP1	7.73434	15.7066	6.78521	12.0533	10.9324	8.91675	5.71951	12.2523	4.76882	3.87859	7.44059	3.83266	6.30091	4.89733	11.4736	4.03789	12.0762	10.3443	10.8488	11.9172	10.1356	5.08952	11.5047	5.90334	13.2191	9.76838	11.6624	7.87989	13.2111	10.1872	3.80492	14.0004	8.35793	5.07944	6.27146	2.88993	5.81092	7.8691	10.0093	4.86733	9.49885	13.9517	4.53421	13.763	4.23429	4.76937	13.4573	8.21879	10.6631
DGAT2	1.25107	2.42525	1.46	1.52087	1.05008	1.5638	1.04127	1.7965	1.03775	1.40122	2.10857	1.09268	1.02762	1.09939	1.97306	1.28751	2.10967	2.47787	1.23875	1.69809	1.28256	1.4032	1.79034	1.50898	1.22587	1.49588	1.9025	1.92573	1.55841	1.43369	1.9068	1.97691	1.04116	1.06174	1.2994	1.12008	1.4611	1.40254	2.20103	1.43831	1.08563	1.12427	1.188	1.06318	1.11777	1.09058	2.3034	1.04259	1.18316
ZNF112	1.97507	3.92377	2.46798	2.87105	3.30896	2.86257	2.36794	2.69204	2.15103	2.14653	2.41299	2.20032	2.76107	2.68356	3.7286	2.16004	3.51315	2.89344	3.72661	3.25146	3.28697	2.18972	2.88787	2.55516	3.08543	3.7115	2.51475	2.49501	3.55144	3.94126	2.14215	2.99507	2.79684	2.35084	2.36595	1.98222	2.31441	2.71509	2.6022	2.2728	2.70542	4.80385	2.20734	3.75086	1.9915	2.23729	3.3299	3.3242	4.34301
CS	37.8464	26.4825	27.9928	24.5339	21.5163	24.0183	20.6869	36.0258	29.7001	43.2586	34.5259	28.9483	34.6341	18.4152	22.1805	29.089	29.9373	28.4465	21.8075	25.9235	14.7996	32.5816	22.6973	26.2378	28.3609	31.0622	14.8181	35.6982	23.4516	36.1937	41.7354	29.0806	29.2086	25.5981	22.8253	27.9549	13.9231	32.5592	20.8982	26.4868	37.3315	28.6682	9.91975	7.31128	39.4953	17.1626	27.5525	23.9051	17.5005
LTK	1.13976	1.13242	1.80462	2.07891	1.53968	1.0149	1.00423	1.37526	2.75235	1.09819	0.843986	2.93987	0.802881	1.98874	1.10066	0.857508	1.32357	0.799945	0.749646	1.39612	1.10406	1.80562	1.00431	2.08965	3.91943	0.957565	1.22235	1.3034	1.28184	0.953934	4.60994	1.25078	1.34188	0.786579	1.11959	0.858357	1.75602	1.97885	1.18951	1.90977	0.836723	1.29305	1.31909	4.27732	1.08899	8.32367	1.06968	0.799559	2.12542
ELMO2	5.07724	8.59448	9.01482	6.42324	5.96365	6.80944	5.7142	9.00657	6.22013	6.27732	7.67279	8.8353	6.79448	8.35801	5.39038	6.20662	8.43871	7.64057	7.46885	5.37404	4.51588	9.26541	6.94505	6.17233	8.99038	7.32087	7.82566	7.51573	6.48295	7.35454	6.80196	8.26325	8.7475	7.18969	4.76816	7.53131	9.19967	5.91288	15.8485	8.77094	5.90242	6.83716	3.63008	7.52153	6.75912	8.6519	8.03197	9.13133	8.62365
VMP1	15.1974	36.3149	6.63914	19.1002	9.94979	5.25635	5.27928	27.7386	4.48573	7.97117	15.3738	12.1467	14.3784	7.2894	11.7889	4.88085	14.1282	21.1256	10.4277	11.4264	10.7512	8.9583	18.2081	9.36661	10.5135	8.39796	28.861	14.9648	6.04461	9.94757	7.81662	44.5228	10.7801	12.2397	7.62266	1.58945	14.3603	13.8908	10.3584	11.5918	9.41376	11.0625	5.32635	22.4701	3.38867	10.2053	23.4525	15.91	10.5025
APPBP2	4.59476	7.84834	3.84932	6.14542	4.80902	4.12929	3.15146	6.01816	3.18455	3.34127	5.38293	3.79625	4.33815	3.29407	4.93281	2.93789	6.55143	6.32436	5.12818	4.47845	4.04777	3.76031	5.7931	3.70879	6.2814	4.74261	6.24399	4.52565	5.1804	4.89803	3.1375	6.42016	4.02663	3.81939	3.4039	2.58387	5.11553	5.09478	4.6634	3.25072	5.4107	5.583	2.89593	7.8913	2.95355	4.08826	6.36455	5.54136	6.3694
POLD1	3.70661	5.77107	6.27836	4.51582	4.47933	4.82079	6.08424	5.34046	5.86214	9.57122	5.65861	8.47175	9.24495	6.28302	7.05606	9.02944	6.25497	5.27736	5.24858	3.60421	4.94281	5.84462	5.20124	3.71634	4.26101	6.42064	4.38713	6.50632	5.1559	5.58659	6.64667	4.35626	9.54879	7.79276	4.56855	11.2913	3.74986	4.03988	6.48213	8.04854	3.4776	4.52024	2.55023	3.79238	6.04742	7.34552	7.0563	9.34518	4.99852
SEZ6	1.13051	1.21093	1.1382	1.14489	1.14702	1.12298	1.14892	1.6206	1.21458	1.11933	1.25558	1.16528	1.12929	1.12968	1.15706	1.12298	1.14862	1.13241	1.13127	1.13028	1.12846	1.12671	1.12443	1.12328	1.13485	1.14124	1.12503	1.15752	1.13006	1.11933	1.12968	1.12534	1.13074	1.11933	1.13979	1.23603	1.11933	1.15935	1.44448	1.14147	1.16688	1.15273	1.34064	1.11933	1.28921	1.53364	1.12937	1.14694	1.16855
EIF4B	153.518	54.5817	83.3357	55.8169	104.983	152.783	97.5781	88.2113	77.2018	62.8848	88.998	42.4272	108.269	19.5458	107.711	67.2501	79.6194	37.4857	108.876	100.418	69.9868	61.2139	66.1747	62.4547	112.108	161.576	30.7655	122.025	172.862	70.8985	43.7559	58.1588	81.4559	66.4083	55.7931	19.0136	11.7373	89.6011	38.5791	42.6905	168.986	123.124	22.7807	22.1889	53.102	36.4731	60.3052	76.0924	86.8169
SLC6A16	2.86354	2.49888	2.99704	2.00644	4.1875	3.78278	3.07594	2.18049	2.69692	3.10726	3.24929	3.20322	2.94425	2.82008	3.1736	2.40874	2.69291	2.28428	2.3164	2.24152	3.0397	2.26762	2.01035	2.33065	2.43514	2.88101	2.31048	2.14466	4.44145	2.52377	1.95314	2.68648	2.44588	2.73195	2.39098	2.36548	2.42872	2.07128	2.98711	3.85124	2.65517	5.21424	2.33236	2.50912	2.50791	2.20197	2.24965	2.84899	5.6316
SPHK2	4.25048	4.9089	4.10233	4.03443	3.21354	3.2992	2.4557	4.37435	3.79768	3.76473	3.60663	5.66737	3.4994	4.18568	2.80039	4.81639	5.3917	4.94774	3.23312	2.99877	2.87761	5.80135	5.14373	4.31034	3.48683	2.4358	4.85874	4.95777	3.02217	2.96661	5.01835	4.35007	3.3554	3.58705	3.88851	4.33892	5.25	4.13266	4.99248	4.08761	3.28566	3.30063	2.34919	3.53984	5.92004	3.89202	5.70391	3.46223	4.76616
RPL18	427.529	2.07682	465.861	105.004	592.081	547.384	634.297	118.789	797.24	684.838	411.314	212.168	413.764	627.82	261.552	464.147	64.2364	89.9084	248.285	471.674	426.672	233.639	159.47	360.461	96.9566	267.772	36.1754	309.565	436.696	299.887	346.69	84.2049	182.005	462.315	633.808	521.321	200.853	362.107	315.496	183.307	456.571	467.082	1021.29	190.583	491.304	169.79	87.6237	174.101	236.474
CA11	1.27633	2.64015	2.89508	1.4651	2.36929	3.17023	1.88918	2.54918	2.21707	1.29143	4.25492	1.39329	2.30238	2.86312	1.56137	2.06064	1.58896	1.35489	10.0131	1.75643	4.5044	1.73076	3.67395	1.39804	1.33504	1.41	2.40163	1.24552	2.32392	1.26506	1.25724	1.92176	3.57538	1.84565	1.68968	4.84976	1.67488	2.69051	4.72621	2.01664	1.69504	1.90375	2.14778	2.04546	2.74516	3.11697	3.19829	3.00246	1.79698
ISOC2	18.4358	9.75221	5.75355	12.7931	7.29584	5.6502	8.50549	14.7956	8.35828	13.2188	12.648	10.325	7.71329	15.3384	6.95466	9.8863	14.7285	15.242	6.18108	10.9869	7.45808	6.89387	9.33521	16.0977	3.64172	4.23705	13.4107	15.3899	3.00955	8.816	16.1023	16.1178	5.93722	10.4531	12.586	6.59327	14.1678	14.1212	13.1205	9.94015	7.04901	5.92433	8.1965	3.77452	12.996	5.16029	15.351	7.10393	5.54807
U2AF2	25.5407	35.3097	26.6138	29.0628	21.0699	19.0294	14.2731	35.5334	26.8244	43.1869	26.9232	38.064	24.9157	21.65	22.3412	24.7688	45.3522	28.6561	16.9933	14.1702	21.1115	35.7216	33.7528	27.7496	24.6217	20.4333	25.5474	33.2433	24.0561	16.6677	30.8353	32.7692	23.5575	28.4049	22.1745	33.0123	18.1136	21.7494	24.2081	23.9328	15.507	19.8164	8.97665	14.3394	27.5512	21.8409	44.5157	22.863	25.7116
EPN1	10.577	6.01592	13.6893	6.40638	9.83408	9.56682	14.7319	7.72261	18.5884	22.1809	12.8798	15.955	13.8301	15.774	9.74586	14.3161	6.90122	7.57877	6.76934	8.85842	8.89606	13.9627	8.43779	13.6561	5.38524	8.94329	7.25321	13.8003	6.79723	8.61492	16.7034	6.68645	11.1991	14.8809	13.1044	19.1906	10.5445	10.6813	14.1142	11.993	10.9424	7.54844	13.7458	5.96906	20.2261	10.5355	7.67248	10.0158	10.2772
MED29	12.324	22.5033	7.91016	15.2872	11.2634	8.97039	7.64779	18.2043	7.0312	8.79835	8.98184	13.0526	10.1248	13.6578	12.2844	9.58561	20.4051	21.5575	20.2688	19.3919	12.4058	14.8574	18.0219	16.9677	14.099	10.2946	17.5917	15.6653	8.76807	17.4864	12.0244	19.1575	12.2291	9.16532	13.0868	7.57516	16.3318	14.8977	16.9496	10.3488	11.4999	12.0688	8.28452	15.6557	13.2961	8.37173	20.7017	13.3884	16.0705
AHRR	3.5204	3.5387	3.21082	3.41134	3.26828	3.24577	3.21457	3.29689	3.25515	3.22302	3.21106	3.19089	3.21997	3.27321	3.30885	3.26992	3.26875	3.29173	3.18596	3.70334	3.50117	3.21739	3.27977	3.24788	3.31566	3.21645	3.55605	3.39305	3.26664	3.74063	3.36819	3.31073	3.20871	3.22489	3.2786	3.16509	3.24788	3.38508	3.21387	3.19112	3.18924	3.32644	3.23287	3.36655	3.24952	3.27368	3.3105	3.21528	3.36866
GSC2	1.02094	1.05094	1.04489	1.0279	1.06043	1.03479	1.03701	1.08002	1.04359	1.15433	1.04688	1.03441	1.03984	1.0406	1.14246	1.16726	1.03104	1.02591	1.03004	1.04175	1.12486	1.02094	1.02094	1.02094	1.02094	1.06961	1.02637	1.04275	1.04129	1.02094	1.02094	1.02668	1.04267	1.04321	1.02874	1.02094	1.04481	1.02094	1.04673	1.03027	1.02622	1.03249	1.0667	1.05231	1.02094	1.20101	1.03525	1.03142	1.04435
ZNF275	4.37112	6.17618	4.76275	5.56091	4.00704	3.95318	4.21373	4.86663	3.75228	4.80939	3.87186	4.42194	4.70595	4.11904	6.06043	3.58304	5.40504	5.46451	4.17798	4.35694	5.24872	5.04247	4.84996	4.63711	3.73908	5.43865	5.79221	5.58418	4.22149	4.53911	5.22866	4.93547	5.27788	3.82415	4.60349	4.1152	3.57252	5.86943	4.81491	3.9184	4.80181	4.87519	3.97895	5.22215	4.75258	4.4635	4.95741	5.53371	6.80651
MTMR1	4.47237	7.78134	4.96064	7.56078	4.88363	5.15187	3.69882	5.33195	3.97088	3.10167	4.80173	3.43019	4.20298	3.46625	4.84742	3.65641	6.55306	5.53533	6.30575	4.71975	3.46404	3.83106	6.09679	3.81754	4.23324	5.18427	6.11322	5.0767	6.35655	5.49132	4.35242	5.15814	5.52562	3.98524	4.05965	2.74328	3.52867	5.28657	4.29566	3.94574	6.79097	6.73519	2.59888	4.60225	3.1294	3.13712	5.27908	7.24211	5.47871
GPC1	12.1933	14.6916	9.70286	14.1554	6.03514	5.52014	8.77776	12.7908	12.3836	10.2038	9.01732	8.8844	7.66497	4.9238	4.64326	10.6313	12.9809	15.4328	10.6104	19.0989	5.09998	34.9746	14.9472	25.2992	12.0699	4.64059	11.0567	17.1647	3.04108	14.4575	26.3514	16.6995	12.8913	4.74556	22.3103	10.2188	12.6613	18.695	11.4585	2.74957	6.13515	1.24115	6.39284	-0.216768	15.4836	21.2852	15.6902	4.34223	5.80304
ADCK1	6.73292	6.60988	6.67538	6.60327	5.9331	5.46419	5.43109	7.23596	7.11707	6.37113	6.59356	7.92181	5.95467	5.62304	4.83859	8.53318	5.71886	5.93302	5.54489	5.83402	5.94655	7.78827	7.25268	5.38214	8.04875	4.70672	7.31212	8.06984	5.62384	6.05478	7.33855	7.72453	7.66428	8.10844	8.1503	8.03745	9.07864	7.81724	7.74466	9.01299	5.95944	7.6256	3.44046	5.14554	7.72087	5.83251	7.0113	5.93939	7.92858
HAGH	4.89793	6.24842	5.96782	7.96681	5.59314	6.64074	6.61568	6.50103	7.51725	5.0272	7.54745	9.08881	4.72628	4.95335	5.19205	5.64437	7.47368	8.92854	7.11093	9.06556	5.591	8.34181	6.03645	9.33833	9.32639	4.47683	11.5341	8.65545	5.00632	7.17672	6.74621	6.72621	6.19814	6.05329	8.01582	5.08096	7.65419	6.4581	6.565	8.66099	6.60113	5.94205	4.84661	4.81096	9.5556	6.11156	7.11868	6.90331	5.43794
RNF4	7.92423	15.0096	8.19098	9.97062	7.74174	8.15355	6.10434	10.4924	7.67421	7.35513	7.64992	13.5328	8.11543	5.77289	7.9007	6.91872	14.7597	14.4977	9.77453	8.02254	5.9385	7.54832	10.9349	8.28952	8.17295	9.10841	13.3065	13.3146	8.20068	9.5423	8.27952	10.573	8.188	6.97594	6.41952	5.37712	5.89374	8.7568	8.68698	7.20893	8.77559	8.56934	3.94574	8.14263	6.0857	6.6147	17.0473	8.34154	9.33445
CASP8	2.12	3.80482	1.54493	2.58966	1.99615	1.93756	1.82541	3.54186	1.64359	1.64181	2.10613	1.5833	1.97786	1.95337	2.30252	1.64158	3.04073	2.61005	2.80233	2.82915	2.44559	1.85541	3.02655	2.08629	2.15209	2.51875	3.98138	2.07613	2.24152	2.62516	1.74799	4.86684	2.09543	1.63483	1.88687	1.41682	2.08791	2.18665	1.97825	1.86928	1.85913	1.88455	1.50874	2.67755	1.41155	2.48132	2.76443	1.99917	2.52309
LIMCH1	1.681	3.67841	1.84517	2.87569	2.37272	2.42545	1.50401	2.41255	1.52718	1.44618	2.47424	1.88993	1.61878	1.56368	1.52042	1.43021	3.0124	2.68317	2.00602	1.65178	1.76875	1.57342	2.0362	1.69425	1.83517	1.70179	2.06718	2.08034	2.56058	1.69609	1.56824	2.45046	2.08964	1.48155	1.64836	1.50734	1.63256	2.90482	2.16554	1.7497	2.27347	1.97574	1.58834	1.6702	1.74637	1.51068	3.22879	1.91397	2.75267
TM7SF3	12.1214	35.9578	15.4122	19.2601	10.1147	15.9024	2.39182	18.4852	5.61527	5.92313	13.1091	10.4373	5.50208	7.37601	6.26238	8.66338	21.7711	24.5417	11.6557	4.56043	4.33803	16.8517	17.9556	9.80199	23.1789	7.1341	19.8779	10.7195	21.753	9.65103	10.7436	16.1736	6.37038	5.81886	6.96418	3.58999	7.67161	12.9983	12.9912	11.2786	12.6481	19.0708	3.752	16.4682	4.1336	9.79636	23.5495	11.6502	16.8223
DLX3	1.09188	1.33905	1.49993	1.17351	1.37591	1.77645	1.22175	1.41973	1.30757	1.03501	1.31873	2.05518	1.03991	1.95362	1.05415	1.84265	1.13728	1.11031	1.4622	1.23955	1.21139	1.22516	1.14685	1.22318	1.26296	1.15302	1.17841	1.15879	1.83474	1.11498	1.25664	1.15887	1.95441	1.53331	1.09093	1.08152	1.2356	1.1569	1.95797	1.28709	1.24414	1.28092	1.42321	1.09148	1.25347	3.56297	1.28851	1.61328	1.50025
SPA17	1.20048	1.6176	1.90928	1.65908	1.61024	1.49684	1.45001	1.29915	1.27189	1.19847	1.66593	1.48162	1.29815	1.37475	1.45787	1.22021	1.47594	1.99726	2.09159	1.63449	1.31153	1.28527	1.5905	1.53648	1.28577	1.32809	1.6375	1.32608	1.73518	2.45	1.28745	1.41238	1.46824	1.38746	1.26269	1.07052	1.50738	1.45704	1.89691	1.58515	1.65372	1.40168	1.27791	1.29966	1.19011	1.55404	1.4179	1.42325	1.37391
TSPAN32	1.08037	1.08743	0.958037	1.1658	1.03823	0.98054	0.953174	1.11365	1.02087	1.12671	0.991314	0.948788	0.939825	2.44798	0.948025	0.992935	1.10011	1.04061	0.934009	1.02097	0.973007	1.1762	1.11203	0.936107	0.97234	1.01668	1.39617	0.978442	0.996082	0.953937	0.952984	1.23255	1.03594	0.958132	0.964616	1.46425	0.918276	0.947167	1.0285	0.939158	1.03746	1.07017	0.953937	1.07322	0.924283	0.929718	1.15036	0.922567	1.18812
DMRT3	1.04234	1.05603	1.06284	1.05021	1.04234	1.07394	1.04234	1.04234	1.05093	1.04234	1.04234	1.04234	1.04234	1.04234	1.11153	1.04234	1.06534	1.04234	1.04234	1.04234	1.07188	1.05039	1.04789	1.05084	1.04234	1.04234	1.04851	1.04234	1.04234	1.04234	1.04234	1.04234	1.05469	1.04234	1.04234	1.04234	1.04234	1.04234	1.04825	1.04234	1.04234	1.04896	1.04234	1.04234	1.04234	1.04234	1.0478	1.04234	1.04234
ST3GAL6	7.56078	13.2775	12.7469	11.1893	18.0357	25.6931	11.8437	8.51664	3.43331	2.14098	9.25096	5.38014	6.6925	5.77091	4.24851	7.30938	18.9476	11.9022	25.835	12.6484	12.2855	5.97707	11.905	6.23487	15.8256	10.1534	12.8305	7.95559	36.3522	11.7789	2.64804	10.7795	9.56191	12.8708	7.21594	4.37592	7.84234	5.09051	8.46744	6.30874	15.6833	32.5449	2.60372	11.8744	1.69446	2.78116	15.9745	21.5479	11.6066
ATP2C2	0.997497	1.02066	1.01278	1.02478	1.01456	1.02778	0.997872	1.02347	1.00434	0.997497	1.00294	1.00322	1.01372	1.01587	1.02337	1.01269	1.032	1.02919	1.02825	1.01719	1.02469	1.07147	1.00284	1.01081	1.00734	1.01569	1.12745	1.023	1.00922	1.01953	0.994403	1.02459	0.999185	0.999279	1.02159	0.994403	1.01175	1.01109	1.0124	1.00256	0.996747	1.0576	0.998435	1.02525	1.00003	1.00922	1.02159	1.01044	1.06604
NGFR	0.710901	1.52477	0.809106	1.75738	0.631637	0.598927	0.645862	9.01697	1.5412	0.74498	17.2871	1.06021	0.785144	0.676822	0.687624	0.664803	1.66473	0.718508	1.61696	0.632854	0.732048	0.750001	0.794729	0.627986	0.716682	0.905638	1.04195	0.654229	0.615814	0.669215	0.759433	0.916212	0.620987	0.660391	0.639168	0.723605	0.705424	1.57048	1.02841	0.634299	0.62365	0.677583	3.45456	0.698882	1.25784	4.34191	1.15948	1.30401	1.53351
CDON	1.51982	2.03141	1.95816	2.08334	1.54052	1.80746	1.45307	2.00852	1.54026	1.53903	2.20563	1.73342	1.76965	1.59228	1.5028	1.49552	1.74869	1.77921	1.77904	1.57061	1.49473	1.52201	1.83807	1.45324	1.8193	1.84439	1.66535	1.72553	2.83397	1.60272	1.65281	1.51245	1.87492	1.63939	1.51333	1.33192	2.20282	1.80185	1.91387	2.25536	1.67053	1.69754	1.33613	2.44782	1.42377	2.7038	2.03001	1.79904	2.46125
TAF2	5.44446	15.1033	3.30664	12.0041	4.28885	4.35855	2.597	12.7937	2.87443	3.14585	3.60645	3.28617	3.73654	3.56675	4.84031	2.73395	14.5712	9.9186	4.98248	4.48172	5.22305	4.59081	8.68944	4.22768	6.34705	4.77176	7.5846	6.3155	5.66665	3.8444	3.5816	12.2131	4.16037	2.89551	3.47728	2.55261	4.39448	5.3006	3.68523	3.78778	4.5835	5.12873	2.66517	5.84236	2.74618	3.60237	14.574	3.62568	5.63772
HIPK2	10.3552	9.87233	11.6187	6.69499	9.77633	7.03187	7.34138	7.86767	6.36947	18.9156	10.3125	8.2535	22.09	16.5708	20.2667	5.5474	4.68453	6.33478	2.87096	3.84378	5.32558	8.87686	9.19193	4.5257	9.57098	17.7089	6.83522	7.60345	11.8617	5.57165	6.11456	4.77611	8.72832	10.8809	6.93221	5.01082	10.8853	11.3161	9.41626	7.52263	15.0785	9.8872	9.735	23.5825	3.77714	20.3181	3.85324	10.6448	15.0321
TNPO3	15.0102	13.8762	9.37506	12.5873	10.4625	7.52777	5.62137	14.0076	7.64623	6.32853	10.3024	8.51454	4.62818	9.8062	6.82855	3.64913	14.6549	13.5076	6.43224	7.49737	3.85855	10.5859	11.6668	8.74	11.6669	6.77723	12.3952	11.5378	10.4713	6.41598	8.56243	12.8729	6.04685	4.2098	7.96105	2.83825	11.3371	10.3789	10.1201	8.57167	11.108	10.7835	3.97136	12.5788	7.44139	7.77981	13.5835	5.64909	11.3778
RFXANK	14.7926	9.12115	10.4199	8.11477	11.7792	10.5791	17.2421	12.3681	15.8179	24.7369	15.7884	17.0281	20.2534	21.0625	13.8462	17.6912	8.93005	9.71791	9.96155	18.6613	16.2648	19.1076	12.2746	22.7084	9.0916	11.4318	11.8418	20.6995	8.83209	14.7716	21.77	12.3426	14.3346	21.7491	18.6837	26.2066	14.1065	15.1338	14.6874	13.3095	9.31379	10.8833	15.0568	10.0561	22.2704	11.3149	12.3549	14.7839	9.69615
TMEM161A	16.9579	19.6432	11.0748	25.6653	7.02549	6.86122	11.6492	22.7927	9.15223	13.9995	12.9191	12.5253	12.9237	15.5329	9.05912	15.0543	17.226	20.1665	11.7886	14.6661	7.62194	43.2496	19.8186	31.1974	15.4061	6.26819	19.4399	24.7069	5.76363	12.0623	33.589	22.3438	15.2152	17.5813	17.6107	11.8865	21.7234	19.4022	12.9169	14.4442	4.91399	6.39856	5.86208	6.51606	18.241	6.02338	23.8256	14.1457	6.31437
LPAR2	1.69915	2.57594	3.29498	2.64158	3.91368	3.80319	2.99328	2.78215	3.82413	1.80956	3.26528	3.96986	1.72369	5.7415	2.89037	2.88201	2.32614	2.26167	3.16769	1.75174	1.44059	2.6197	2.98047	1.52771	2.09422	2.44537	4.36212	1.85105	2.45413	1.47708	1.74713	2.80505	2.08656	2.82357	1.95537	6.40036	4.04479	2.05929	7.25981	2.46038	3.0461	3.36772	2.71339	2.95367	2.11235	2.72199	2.97297	2.07992	4.56809
CTSA	19.2072	32.1319	25.1451	16.895	12.1323	13.9106	12.775	28.8801	17.1301	18.3149	33.8264	24.5566	12.7204	13.3342	9.13818	17.8358	26.3788	34.3185	5.15111	9.10963	10.1623	35.7362	22.241	24.4035	13.2468	10.1779	29.4837	18.038	8.77288	11.4274	26.5409	31.8238	12.0639	19.3231	17.0091	23.1603	39.5735	14.8195	51.9016	26.5766	14.8365	11.1238	20.4671	17.4622	24.1827	25.755	22.35	28.0592	8.55712
SUGP2	4.54462	10.1777	5.51418	8.40921	6.65453	5.97112	3.88809	6.44406	4.60689	3.96085	6.46344	5.35816	5.42633	5.85554	4.77056	3.65541	9.02278	8.27051	7.68176	6.55764	5.65089	4.87978	6.66089	5.05893	6.78565	5.42212	8.04472	6.04771	7.28862	8.64052	7.39194	8.78221	6.23612	5.00018	5.80338	3.10618	4.63737	6.07015	5.8763	4.42078	6.76804	11.5663	4.00665	6.71642	3.84313	5.33886	6.89778	4.60544	10.0116
SLC12A2	2.22751	2.95955	2.41136	2.8936	2.68813	3.03721	1.95728	2.95555	1.98008	1.89042	2.58086	2.13976	1.99861	2.01795	2.11442	1.7905	3.00724	3.58685	3.50419	2.04729	1.88833	2.17174	2.95882	1.96209	2.75935	2.34133	2.70476	2.60702	4.26857	2.73328	2.01904	2.53862	1.99942	1.92658	1.93239	1.85191	2.04439	2.87825	2.38011	2.06619	3.04402	3.0135	1.82112	2.78351	1.8679	1.89678	2.96191	2.13486	3.24395
SNX24	2.8114	2.91087	3.26655	4.28805	4.65645	6.66146	2.94347	2.94508	3.89192	1.84769	3.91727	2.2496	2.12107	2.25222	2.61699	2.60027	2.76894	4.17702	5.87844	4.43476	2.50873	2.2956	3.46335	3.44455	3.9457	2.41727	4.8225	3.39253	4.40864	5.9162	2.83806	3.21315	2.77271	2.63055	2.98407	1.6005	3.82534	3.30523	4.32411	2.44007	5.72256	4.75908	2.6445	4.1865	3.25145	2.03785	3.00272	3.3134	2.10651
EYA2	0.887034	0.896473	1.89508	1.04612	0.96871	0.955922	1.0446	1.02778	1.08083	0.952268	1.6585	1.4663	0.999843	3.83467	0.903552	0.916264	0.908881	1.11174	0.940927	0.884675	0.923343	0.912078	1.02108	0.95478	0.916797	1.00647	1.16898	0.961555	0.87006	1.06203	1.02489	1.00593	0.871049	1.0771	1.021	0.995961	1.01941	1.62486	15.0863	0.974038	2.56249	0.902563	5.97117	1.26017	2.96204	0.965741	0.932401	0.960718	1.53214
CNN2	3.08088	5.74897	23.5298	9.04172	12.6407	21.0385	31.2364	10.3404	16.8848	6.36473	31.3884	21.4571	15.2132	6.5905	13.1907	20.8456	7.93985	7.35371	3.08012	5.20721	11.6376	5.93654	8.99384	5.49031	10.5977	18.008	21.0905	2.51461	6.5478	8.2314	9.44449	9.51589	10.4723	12.7124	6.92613	23.2471	4.0484	5.88226	17.8389	9.86932	10.1836	7.17748	9.57991	4.56268	7.74071	10.914	10.2422	18.2214	4.41295
ABCA7	2.58396	3.63633	2.85444	3.19846	1.6729	2.50134	1.93423	2.60134	2.64812	1.54659	2.39579	1.78676	1.50435	1.5172	3.73349	1.52166	2.0617	2.26986	2.29517	1.5829	1.41312	2.15239	2.06708	1.91284	2.2554	1.40827	4.31691	1.90307	1.70583	1.40135	1.9543	2.45403	2.10231	1.67452	1.98392	2.48349	4.27052	2.14255	2.87374	2.62265	2.04416	1.6859	2.21309	1.54951	1.97531	2.57026	1.65552	2.37871	1.45097
SNCAIP	1.11841	1.09704	1.09704	1.12213	1.09001	1.11758	1.09718	1.11993	1.08642	1.08146	1.28388	1.09897	1.08559	1.08146	1.11027	1.08146	1.12103	1.13647	1.08435	1.10186	1.08711	1.10435	1.12875	1.12048	1.08532	1.09497	1.14861	1.10986	1.08146	1.10186	1.10283	1.12268	1.08146	1.08146	1.08656	1.08146	1.10738	1.17357	1.08146	1.08752	1.08146	1.08518	1.13509	1.10186	1.13192	1.08876	1.15923	1.102	1.16143
DDX20	4.55422	6.96952	3.44566	4.32366	4.92646	3.89307	3.37083	6.0367	2.87415	2.93292	3.38647	2.89971	3.77199	3.12396	8.77597	2.96395	4.19527	5.7192	5.01138	3.57557	5.59517	3.6034	4.74862	2.94747	4.30315	5.84154	5.32863	3.20586	5.10118	3.3224	2.66764	6.28331	3.25286	3.25782	3.44701	2.26488	3.35788	4.03904	4.02937	3.4064	4.64352	5.35243	2.70295	5.12481	2.28455	2.72053	6.54061	4.7181	4.24765
BTBD1	11.5033	20.9563	8.29388	16.2632	11.0573	12.4263	6.20323	17.3257	5.49711	4.33841	7.80438	4.59511	7.2959	5.30729	8.10965	4.95576	21.2445	18.0571	5.5073	10.0427	5.23965	9.89817	14.0073	6.62891	16.5742	11.5734	13.5088	9.63749	16.1368	5.21705	5.41606	18.0252	4.65655	4.30379	7.08003	3.75562	7.23216	12.5844	7.64773	5.56031	12.6458	14.1633	3.6123	9.19411	3.34281	5.73864	20.6959	7.20949	10.8398
FAR2	5.23326	22.5172	6.74788	9.96464	6.54804	7.24697	1.93328	9.19098	4.44997	5.34032	8.26425	5.58953	6.14601	3.06313	9.59493	2.63182	15.779	10.9944	3.50941	4.4878	6.6762	8.79101	11.1889	8.52683	8.04791	8.11929	5.12666	5.79639	6.8609	6.05056	4.85659	12.6455	6.68621	5.01165	4.94562	2.26463	6.55698	9.02768	6.11911	9.96847	8.51827	6.87038	2.92122	28.2677	2.78725	16.2185	14.4136	6.76171	3.71979
BCAS1	1.3211	1.3263	1.35768	1.34521	1.33835	1.36329	1.34209	1.37908	1.3211	1.3211	1.42833	1.35622	1.47509	1.33814	1.34043	1.3211	1.32983	1.34708	1.35685	1.3211	1.3211	1.32734	1.33378	1.3211	1.3211	1.33918	1.45347	1.3211	1.32692	1.3211	1.3211	1.35622	1.33523	1.3211	1.3211	1.36495	1.33503	1.33066	1.33004	1.3211	1.33503	1.36142	1.329	1.43041	1.35477	1.3211	1.3211	1.3211	1.42812
POU1F1	1.32765	1.32765	1.32765	1.36131	1.32765	1.32765	1.32765	1.36353	1.32765	1.32765	1.42198	1.3602	1.32765	1.37526	1.38124	1.36153	1.32765	1.35179	1.32765	1.37814	1.36973	1.32765	1.39807	1.32765	1.32765	1.32765	1.354	1.32765	1.32765	1.3529	1.32765	1.35555	1.32765	1.38168	1.3653	1.32765	1.32765	1.32765	1.35268	1.35024	1.32765	1.32765	1.37194	1.36574	1.32765	1.32765	1.3509	1.37858	1.41268
CHI3L2	0.95591	1.3805	1.04808	1.11605	0.965905	0.972805	0.957418	4.48882	1.04387	0.978913	8.40515	1.00525	0.949406	0.992873	1.03539	0.961463	1.02777	1.06307	1.10582	0.965667	0.987083	1.22345	1.87616	0.975105	1.05633	0.967174	2.69321	0.962177	0.966618	0.948455	0.998266	1.93628	0.957655	0.971774	1.13041	0.944171	1.17396	1.18221	1.03348	1.06759	0.974868	0.963287	1.04237	1.09305	1.2643	1.00921	1.31522	1.0135	0.953848
SBNO2	9.15181	24.7485	8.975	12.3888	5.68335	9.84573	7.13046	13.0861	8.76624	9.88719	12.014	13.2223	15.3045	7.85085	9.47515	26.9561	16.678	9.12982	6.1663	9.54141	10.2022	11.7055	18.7754	10.6148	8.01123	14.7286	16.0235	12.2237	8.89793	9.07961	22.4135	14.846	15.5753	11.0011	9.75816	13.6077	8.94837	10.7146	7.77592	13.4779	4.90788	9.69547	3.53541	6.86418	5.39486	6.75835	13.4124	14.5697	6.48629
PMS1	2.06372	3.47091	1.76015	2.98418	2.64222	2.30962	1.69062	2.65478	1.41561	1.38603	1.79371	1.55249	1.84662	1.87432	2.82998	1.39149	3.63362	3.17374	2.78698	3.0275	2.65627	1.53204	2.66384	1.70451	2.23041	2.23064	2.31196	2.10875	3.32116	2.50253	1.60118	3.76004	1.85606	1.45775	2.0638	1.28872	1.76733	2.26022	2.04429	1.50379	1.96992	4.08578	1.59369	3.89872	1.51316	1.95759	3.60857	1.81267	4.02834
HMG20B	18.6357	20.0479	27.0803	15.214	28.4185	32.2457	22.9103	22.9479	42.2811	30.6426	29.7231	47.9896	34.1963	35.5499	17.4937	45.391	18.5913	15.4508	29.8681	26.8697	20.6357	28.2698	18.1263	26.4566	18.2744	27.5838	22.6797	29.858	17.7546	19.3823	25.5851	14.1949	54.3185	57.0979	25.2633	53.8774	48.2038	17.9373	20.6537	66.6364	8.04264	21.6514	19.777	21.9145	26.5729	13.2571	24.5792	72.3932	20.6351
CALCRL	1.38434	1.38348	1.09929	1.26245	1.09695	1.31582	1.13422	1.28448	1.0764	1.07702	1.22447	1.13743	1.10664	1.09554	1.24323	1.07171	1.59618	1.59876	1.26737	1.11367	1.29011	1.18572	1.19087	1.16141	1.21986	1.27823	2.20793	1.18712	1.27518	1.15415	1.15204	1.51249	1.10851	1.0814	1.1343	1.07093	1.14501	1.22424	1.14133	1.13266	1.2476	1.12719	1.08562	1.31613	1.10562	1.11891	1.50272	1.14493	1.32754
TAF11	10.1854	10.8733	8.5326	8.20586	18.9125	13.9203	6.10217	15.9294	7.8798	7.38489	10.4978	10.3073	13.2686	7.34807	26.43	5.66633	13.6028	8.66677	8.19343	8.1374	17.9315	8.03288	6.93861	6.20058	9.41775	14.0205	10.817	7.11227	13.3757	7.86036	3.88756	10.1864	11.0656	10.2345	6.23161	3.65146	4.00259	7.44321	7.99164	9.28084	6.31684	16.3177	5.50129	14.9999	4.02493	8.03913	13.7197	14.1444	13.4407
ANKS1A	11.6948	12.2735	11.445	8.52047	9.19832	10.8598	5.00726	11.9854	8.81123	8.21266	9.68763	12.7888	14.1352	6.65801	17.7463	10.2498	11.8275	9.19022	8.08949	5.39795	7.32272	11.1066	8.21809	5.53075	15.8256	17.9308	10.1545	9.38846	12.2652	8.08352	9.20023	7.5754	15.4377	9.19457	4.79915	9.73443	5.58244	7.48098	7.57487	13.1756	11.6606	9.24932	3.20674	12.4163	7.85408	9.92511	10.8804	12.5083	14.3919
AP3D1	23.1287	28.2837	28.9458	20.23	19.0161	17.5234	16.5444	26.9895	23.409	26.9429	26.6515	31.2435	26.3681	19.354	16.7941	23.9092	28.1288	21.6019	24.8853	15.1463	10.2684	31.2833	22.0618	16.9392	19.9787	21.677	27.9584	27.2197	19.8559	16.4156	32.7366	20.2241	29.7662	27.5188	17.8312	31.7733	18.9891	21.674	21.282	24.6369	21.7479	19.728	6.29832	18.6681	34.4513	25.0745	26.8994	23.1236	27.9765
ZNF76	4.94182	6.74242	6.14011	5.94997	7.66912	6.28201	4.08201	6.09691	6.59239	6.63179	3.92168	11.259	5.19049	6.10101	5.67761	3.70305	6.68838	4.95065	4.03633	4.3169	4.74928	7.26964	5.17346	4.33687	7.45552	4.044	6.51017	4.94407	6.90446	3.70258	5.06863	5.6999	7.55981	4.24567	5.16401	4.26015	5.22285	4.76066	6.03381	9.80719	4.02759	7.44538	3.35505	12.1741	2.4522	9.05135	5.6166	5.86922	7.41891
SLC9A3R2	8.19013	4.39723	5.08491	5.69139	4.88159	6.22913	10.9885	6.41929	8.9997	13.8115	11.7151	9.05353	11.6423	12.7729	5.42381	22.9782	8.14299	6.65174	7.3649	6.63402	14.2965	14.5664	6.14107	12.1867	7.3506	10.7896	18.7044	13.3397	1.79903	12.2144	14.7344	7.87632	8.30434	4.65994	15.5822	9.07353	14.7134	13.9335	12.8878	9.91952	4.28842	4.61333	10.3899	3.68849	7.66038	22.0562	8.23218	4.40575	9.7165
NTHL1	7.73135	3.68271	5.73127	4.25711	6.66247	6.21925	7.18359	6.33625	6.36219	18.7163	9.60599	6.61392	11.3279	11.0497	11.45	11.8368	6.42452	4.97297	6.96562	7.41202	13.7456	9.02137	5.37624	8.71203	4.23682	8.79589	7.27039	10.1042	5.73909	8.89609	9.13675	5.5627	9.1215	11.1082	9.89218	8.60827	13.1453	8.80278	10.1189	9.08247	5.69178	4.85705	7.54117	6.21468	11.5747	15.3344	7.59995	5.8907	9.62008
UHRF1BP1	4.54447	6.81311	4.92227	4.50558	3.59432	4.79011	2.12925	10.3732	2.91788	2.62793	4.46798	3.72084	3.87878	2.41714	7.27564	2.30496	9.03089	6.32725	3.23459	3.41259	3.06529	4.91404	4.74618	2.88997	5.37046	5.22923	5.74979	2.52116	5.0854	3.23894	3.32024	5.40211	5.22305	3.16237	3.16329	2.0099	2.77672	3.8122	2.97805	4.94828	3.78719	3.4042	1.61418	6.83256	2.07846	4.18009	7.67159	4.50565	3.702
GNAI3	7.08953	8.3024	6.8633	6.33973	7.55972	6.7042	4.93712	8.59825	5.32097	4.88117	7.12485	5.39638	6.35685	5.29799	6.42202	5.33683	5.07927	8.67507	7.62247	4.39051	5.81148	6.07865	8.69156	3.60023	6.22283	8.15752	8.8591	3.98205	8.626	5.13858	3.60578	8.48807	4.92939	6.8565	5.69739	3.83076	4.99737	7.30262	6.94426	6.04099	7.28825	7.87558	4.24875	9.45972	3.99439	4.86031	8.80174	8.57122	5.58752
IPO5	16.4156	14.2796	11.2151	14.6562	18.0171	18.6873	14.4685	16.2893	8.07055	6.42077	11.3538	5.17659	10.5321	9.90497	19.0895	6.61289	14.681	7.6767	17.279	13.7871	15.8022	10.1594	13.0387	8.7248	18.2479	17.897	12.5397	13.986	30.869	9.38088	5.70739	11.5722	9.57017	8.13693	10.3007	1.53774	9.59573	15.6016	8.74357	8.4573	23.7751	19.0374	4.66731	13.8504	6.09719	13.2536	16.8427	10.6959	17.4953
OAT	13.6601	27.9592	17.559	39.1844	20.336	17.1238	4.31564	20.0713	11.1343	5.88011	11.9523	11.2728	7.57508	12.6423	17.7683	9.60155	31.9585	40.7369	29.7631	16.745	10.2393	13.0536	21.6879	19.2667	22.8277	13.8604	31.772	20.0169	15.6666	19.8575	13.9554	26.8808	12.2565	10.1151	9.33743	4.94194	14.3775	25.1064	19.8382	13.4362	24.7077	22.6196	3.804	17.9965	6.94329	10.5568	23.1509	16.6181	22.7291
WDR3	5.15946	6.01692	4.05923	4.46722	4.16181	4.21321	3.3528	6.10198	3.21332	3.34776	4.22857	3.057	3.89509	3.78537	3.87299	3.51268	4.55414	6.38801	4.78147	2.93884	4.21624	3.70419	5.41556	2.76245	4.20492	6.67295	4.02356	3.57091	6.14005	3.05778	3.08058	5.60226	3.69722	3.38731	3.51315	2.70267	3.64837	4.76899	3.66155	4.19034	4.83893	4.34262	2.25242	4.77566	2.40454	3.39514	7.52413	3.59657	4.32556
PKN2	4.82633	16.3701	4.0176	6.97211	7.47858	5.73438	3.33601	9.73354	3.24616	3.42494	3.77586	3.31156	4.04534	3.53863	4.02967	2.33765	16.2132	9.83691	4.7267	5.08289	5.56469	3.74202	10.5398	3.03896	5.99384	6.15719	10.6879	3.76715	10.1239	4.45432	2.7089	10.8778	3.3406	3.01237	4.46326	2.28402	4.1591	5.79458	4.14023	3.17816	6.2038	9.87901	3.11093	9.73461	2.33444	2.96951	11.2443	4.68827	6.89608
WDR18	13.2725	7.1385	13.1391	13.9948	13.0647	7.98484	10.1025	12.0088	13.4863	18.8178	12.8946	16.138	15.0046	16.9516	19.5245	31.0963	13.178	21.131	9.98354	26.2392	11.2281	27.1624	11.518	18.5125	14.1078	8.74543	6.12913	18.035	9.54398	17.5542	26.2805	13.4519	13.7837	29.6492	19.1446	18.6837	16.1074	12.303	15.1203	15.9167	11.456	9.56616	8.67096	9.38072	17.2509	14.268	11.2768	8.89977	11.1638
TRAM2	7.31272	14.7291	6.01726	7.34816	5.17894	4.89567	2.78323	9.32564	4.55224	8.26835	5.64038	9.59081	4.94562	3.86799	12.8954	2.7965	12.6553	7.96343	2.69975	3.71285	4.51725	8.09694	6.2957	4.36357	6.69407	14.5468	12.6583	4.44797	3.51275	5.55621	5.48946	11.2114	4.467	2.27085	3.24605	2.83778	3.36858	6.89049	3.12566	5.12915	3.22119	4.46769	2.37389	6.92271	3.43732	6.30368	9.79759	3.45328	5.05265
NTN1	1.12103	1.20486	1.19706	1.25982	1.11069	1.13956	1.09679	1.63311	1.08791	1.23033	1.25951	1.40872	1.14488	1.21991	1.27479	1.08529	1.34812	1.15816	1.45943	1.24284	1.11802	1.15546	1.15561	1.22995	1.27302	1.20864	1.36526	1.2064	1.08166	1.16796	1.1861	1.34789	1.10968	1.10428	1.16603	1.07865	1.18494	1.68004	1.10042	1.17128	1.069	1.11563	1.10274	1.19606	1.52836	1.17908	1.64948	1.0883	1.32643
GLP2R	0.953224	0.953224	0.953224	0.961385	0.95711	0.953224	0.953224	0.970518	0.953224	0.953224	0.957013	0.95711	0.953224	0.970421	0.959733	0.953224	0.953224	0.956138	0.953224	0.953224	0.953224	0.953224	0.953224	0.953224	0.980914	0.957304	0.972267	0.953224	0.957207	0.953224	0.953224	0.953224	0.953224	0.953224	0.953224	0.953224	0.962551	0.969158	0.959248	0.953224	0.953224	0.953224	0.953224	0.953224	0.953224	0.959831	0.953224	0.953224	0.960025
MCM10	1.30989	1.40477	1.14999	1.59965	1.32878	1.4858	1.21384	1.77358	1.15197	1.18471	1.39497	1.20431	1.38418	1.15934	1.57474	1.14082	1.83321	1.51368	1.31268	1.52159	1.27095	1.4081	1.44623	1.29154	1.36979	1.30989	1.49938	1.41709	1.51602	1.69426	1.25009	1.4929	1.34577	1.21016	1.44353	1.14352	1.20827	1.34308	1.15889	1.19127	1.12139	1.22697	1.1249	1.25117	1.16051	1.35756	2.04176	1.21906	1.35729
DGKA	1.45853	2.76958	1.53526	2.74468	1.39879	1.63665	1.78073	2.23091	1.56809	1.65195	1.71233	1.6308	1.44059	1.60982	1.48008	1.5536	2.12879	1.50811	1.41801	1.58764	1.50418	1.59637	2.48127	2.06256	1.47199	1.6095	3.3837	1.85842	1.37332	1.72971	1.81661	3.0197	1.50707	1.31013	1.65059	1.69327	1.30476	2.23868	1.7217	1.46182	1.43467	1.41649	1.41673	1.6055	1.68278	1.80155	2.65882	1.40664	1.78233
ERBB3	11.7931	-0.538086	14.9054	1.62667	17.7306	25.3798	19.217	0.658925	6.14254	26.2772	9.29245	14.7884	32.5093	14.261	31.0999	4.56496	10.1319	9.0113	17.7896	12.1989	32.7726	9.10038	4.28388	2.26298	53.712	52.2973	3.66066	6.44278	37.6052	16.7261	-1.48339	-1.91797	23.2718	11.6201	12.3743	34.493	2.24761	6.25671	16.4435	3.30846	1.74853	14.4891	2.26807	14.2632	9.67347	46.2285	5.13448	16.138	61.8276
ROPN1	1.67847	1.80209	3.99502	1.7987	2.29455	6.99737	2.79626	1.82771	2.17706	1.8149	4.19742	4.42306	2.47563	1.68222	1.94108	6.99344	1.78809	1.79623	2.88602	1.75899	1.72276	1.85461	1.8537	1.68424	1.80813	1.93431	1.70254	1.78452	3.59195	1.74847	1.68222	1.82432	3.44546	5.97356	1.78745	2.46731	2.23206	1.72523	2.53822	3.50558	1.93449	3.03361	1.91006	1.83201	1.77629	1.74682	2.03725	9.6446	1.74984
ANKRD44	3.57146	10.2833	2.79282	5.95434	2.93819	3.20238	2.20051	5.00024	2.2074	2.25715	2.83901	2.90626	2.84519	2.58979	4.45331	2.14989	5.00721	4.42258	3.17323	2.77135	3.70866	3.07492	4.24418	2.87204	3.16966	3.49596	6.08386	3.04672	3.71231	3.17703	2.45805	8.20413	2.86301	2.48395	2.66599	2.02219	3.22686	3.88675	2.60397	3.19644	2.69119	3.07666	2.18894	6.52724	2.18245	2.95451	6.52756	3.23747	3.34069
ADAT1	2.78423	3.53931	5.87427	4.39891	4.36514	5.86659	3.24464	3.46383	2.98028	3.25502	3.72328	4.13776	4.16748	2.82873	2.7383	3.6245	6.69554	4.64883	4.80334	2.29563	2.24235	4.10796	4.97423	3.38556	5.81593	3.81312	3.17279	2.90843	5.94671	3.6272	3.09334	3.85154	3.99651	3.94762	3.11706	2.2204	5.78764	3.9304	4.34876	3.8268	5.34049	6.0992	2.58117	4.55781	3.40894	3.73232	4.3507	5.60983	4.38734
TBC1D22B	6.1951	5.92677	9.62588	4.88991	6.77241	7.89165	4.31977	7.88639	7.86594	7.41013	8.69084	12.3635	8.40657	4.41656	11.2898	6.17397	7.06546	4.67238	4.31962	3.9966	6.32927	8.0233	5.3371	4.04686	5.75805	9.3728	6.92244	4.68039	7.91705	3.88608	3.67732	5.02545	9.97498	8.8726	4.18408	6.53101	3.74268	4.71685	6.9933	12.4407	5.19539	5.54861	3.53003	10.6204	4.61716	8.61708	8.19644	10.0361	7.03868
NDUFB4	24.3355	14.6607	41.3814	19.8502	36.9287	25.8663	46.7025	21.9587	34.4855	39.0413	39.8846	49.5843	32.6709	32.8605	35.1498	38.0274	14.4409	24.5127	15.9713	28.3273	37.5466	26.152	20.492	29.9485	23.5273	24.782	37.4813	18.4639	20.0886	22.0622	23.1453	25.2011	27.354	43.299	28.9572	40.1813	36.8423	17.2783	36.7113	49.2006	25.29	33.2486	36.9256	46.8292	19.2674	30.4126	15.7995	50.6555	26.2811
SPEN	4.29599	8.23146	6.84125	5.05245	4.42454	4.74488	4.41294	5.3527	5.01834	5.88919	5.57095	3.95135	6.85659	3.38551	4.07765	3.81127	5.49924	4.54796	3.01814	3.28179	2.98395	4.61399	6.68194	2.68884	4.80896	8.92407	4.62364	3.223	6.74953	3.91032	4.16284	4.44167	4.47547	4.51035	3.85145	4.89407	3.26528	5.33969	5.94852	4.64109	5.50056	4.76193	2.96674	6.71176	3.67914	4.60239	4.49587	4.87087	5.1061
MYLK	1.63937	2.10355	1.92954	2.24803	1.9072	1.72481	1.66435	2.80511	1.6597	1.82935	2.69653	1.86292	1.97605	1.97585	2.81118	1.58225	2.14197	2.08363	1.60844	1.50511	1.98192	1.86615	1.62663	1.57244	1.97241	2.43487	3.01571	1.58619	1.72905	1.57487	1.65727	2.35186	2.37997	1.64281	1.70802	1.53594	1.63584	2.6394	1.98879	2.30818	1.61895	1.61895	1.68083	2.64496	1.78355	1.75585	2.42799	2.69713	2.35317
ZC3H15	10.0717	20.7122	5.94283	15.9647	10.1715	10.539	5.41615	16.5014	3.25223	3.13129	6.67261	3.99247	5.13013	4.73874	16.539	3.23627	20.8203	18.4751	16.302	15.095	11.1724	5.24664	13.5011	6.34948	10.9064	10.2115	13.0575	10.1627	16.6924	12.38	4.05943	20.2168	7.78224	3.95995	5.90595	1.54437	6.48959	7.31466	6.99245	4.61452	10.4751	12.5704	2.56857	20.949	3.56383	7.27091	23.7588	7.82034	14.7834
MAP2K4	4.33748	4.4133	3.24643	6.03097	4.50102	4.2687	3.17546	5.84309	3.03618	2.85409	3.70655	4.35031	3.70936	3.22992	4.66394	2.9278	6.20468	5.80107	5.28384	4.18364	3.83957	3.77611	5.02647	3.46718	5.86281	4.74954	6.44515	4.16955	4.43991	4.24311	2.73444	5.4167	4.31259	3.51358	3.57798	2.27003	5.7247	4.73882	4.18113	3.44316	4.92044	5.30606	2.30352	6.37973	3.01802	4.42042	6.59398	4.79313	5.92071
SNAP91	1.15203	1.30959	1.23153	1.20979	1.14852	1.15508	1.15293	1.79585	1.14547	1.14547	1.45458	1.16415	1.15715	1.15005	1.15311	1.1487	1.16191	1.16388	1.23189	1.16478	1.17359	1.1487	1.14772	1.15239	1.17556	1.1487	1.1505	1.15894	1.14547	1.15032	1.14852	1.14547	1.15805	1.16092	1.16712	1.15481	1.14915	1.26135	1.20754	1.14763	1.17745	1.14547	1.23018	1.14547	1.16344	1.60433	1.14772	1.16487	1.19964
SLK	5.03585	10.4218	5.31593	9.66073	7.80493	6.24906	5.31065	8.02179	4.73313	4.79433	5.38193	4.60368	5.77299	4.86568	8.09563	4.04439	7.40922	8.51834	7.14024	8.15411	5.32438	4.40156	9.05002	5.03252	6.00878	7.869	7.02994	6.18073	8.88241	7.27077	4.75221	10.1104	6.30413	4.91726	4.90152	3.80248	4.37209	6.35431	5.29615	4.71622	6.47197	10.6057	4.43638	9.60287	4.36006	4.94076	7.91142	6.16902	11.344
CYB5R4	1.52594	1.9402	1.81722	2.46597	2.03105	2.2837	1.52408	1.94978	1.60684	1.37141	1.73093	1.46841	1.6033	1.72776	2.09668	1.40288	1.81471	2.47817	2.17832	2.18065	1.60088	1.4187	2.45098	1.43509	1.82281	1.94718	2.85918	1.67712	2.62599	1.96868	1.4996	2.09724	1.97585	1.54568	1.58971	1.27879	1.97762	1.73875	2.09696	1.62164	2.14565	2.42026	1.439	2.25093	1.34591	1.61969	1.90501	2.15784	2.2945
COL17A1	0.933332	0.928342	0.919732	0.966403	0.919732	0.923058	0.931277	0.944584	0.923352	0.919732	0.935289	0.926189	0.919732	0.919732	0.940963	0.919732	0.929418	0.948302	0.967772	0.927265	0.928048	0.923156	0.924428	0.930494	0.925406	0.919732	0.982351	0.919732	0.92296	0.929809	0.925994	0.941844	0.927559	0.919732	0.927168	0.924526	0.927363	0.924917	0.919732	0.933234	0.919732	0.919732	0.924134	0.919732	0.95701	0.925113	0.92433	0.924722	0.922569
GSTO2	1.57767	1.31038	2.03515	1.33022	3.11482	1.9877	2.67187	1.33662	3.71469	1.40722	1.57319	1.54694	1.60949	1.75845	1.44965	2.60137	1.33086	1.38481	8.78382	2.51148	3.73371	1.31449	1.3037	1.64405	1.39999	1.67121	1.24628	1.4052	4.39155	1.62906	1.31449	1.25286	3.96625	4.34866	1.34888	1.74153	1.29703	1.3134	1.74025	3.28847	5.73292	6.09458	1.56651	1.31047	2.84214	3.81427	1.44425	2.89371	2.07429
SEC61A2	1.39198	3.31482	1.78155	2.77751	2.2181	2.03054	1.41624	2.28599	1.60412	1.47743	1.92994	1.8287	1.56542	2.03046	1.66084	1.26059	2.37957	2.89415	2.21523	1.9285	1.94134	1.68557	2.12292	1.49075	1.67735	1.51788	3.12447	1.76838	1.9636	2.51161	1.68733	2.79546	1.68214	1.46698	1.86882	1.44137	1.81888	2.03277	1.97389	1.60093	1.86731	3.18797	1.41185	2.5049	1.47639	1.83213	2.30346	1.69969	3.44957
PRKCQ	0.918712	0.97382	1.37668	1.00283	2.19367	1.98176	1.06488	1.12724	1.42406	1.40766	2.12564	1.39544	1.20245	1.01363	2.63761	0.866207	0.985015	0.994948	0.953874	0.924546	1.30115	1.17848	1.45686	0.897347	0.947725	1.61382	1.76086	1.24171	2.03001	0.881895	0.984069	1.11525	1.20363	0.961048	0.943467	1.26599	0.945281	1.01221	2.54742	1.05597	1.85972	1.42966	1.01056	1.18865	1.15743	0.971297	1.27632	0.959471	1.05242
TLE2	1.225	2.43242	9.64189	2.87023	4.38368	6.78309	5.84828	2.14053	9.85784	5.12251	4.32861	4.86394	5.45625	1.93242	2.22378	4.29483	3.84074	2.23545	4.9253	2.80042	3.62288	4.42822	2.50645	1.83674	3.15075	3.25473	1.73015	5.93514	2.90555	4.03396	4.4233	1.40078	5.69408	3.50669	3.72939	3.90994	0.999992	5.80229	13.9321	1.38227	8.81337	5.6669	6.82034	1.13584	4.56161	2.31224	5.53566	2.45884	2.44771
ASB1	4.10959	5.24376	4.79476	4.7963	3.94658	4.07024	2.62506	5.33578	3.8869	3.47632	3.18202	7.12078	4.06432	2.68535	4.29779	3.82823	5.53122	4.58039	3.54131	2.79862	2.87601	4.51755	4.47905	3.05135	4.40266	4.76142	3.87335	5.40208	4.63875	3.21736	3.72065	4.57569	4.48683	3.63487	2.95625	3.49634	2.83058	5.2594	4.4337	4.4722	5.96181	2.70707	1.84949	2.42177	4.39204	5.98884	5.03447	4.53696	7.1157
FAM107B	2.82678	3.43582	2.39997	4.31768	3.56689	2.70704	2.48281	4.80094	2.4375	2.42846	2.87958	2.46618	2.86058	3.37426	3.76691	2.13235	4.5209	5.7091	3.03083	2.91648	2.60502	3.50606	4.7898	2.62438	3.67165	3.86382	8.36363	3.0554	2.87154	3.73595	2.65671	4.7613	2.91611	2.30826	3.18281	2.30589	2.45541	3.15331	3.00443	2.65808	2.81189	3.11258	2.63196	3.62708	2.26862	2.60365	4.47213	2.43906	5.97736
ME1	1.99077	4.68111	1.47651	7.93498	2.03763	1.37934	1.41953	4.20447	1.47418	1.32243	2.47039	1.39332	1.36117	1.90196	1.41663	1.35096	3.90988	8.46765	6.66959	2.57094	1.52948	1.5495	4.08631	1.65857	1.90806	1.52892	5.45652	2.36654	1.39429	2.06585	2.00219	4.94009	1.57602	1.31182	1.70455	1.31005	3.68418	2.55591	2.81674	1.50175	3.65171	1.52731	1.64852	1.96039	1.82704	1.45144	4.1007	1.44075	1.6605
TBC1D1	9.02981	16.6661	3.96773	16.4691	7.42391	3.45425	6.29197	8.7843	5.38248	3.9085	3.79553	6.98671	6.00855	10.7569	2.70059	2.8619	22.1339	13.0758	9.92286	5.68295	2.34485	14.2915	12.042	20.9809	6.73305	6.33742	10.9684	16.8955	2.64745	4.49255	6.94834	12.2969	6.89863	2.34934	9.16281	4.98007	2.94092	16.5326	6.31778	2.50441	12.4962	7.92658	2.56371	4.91026	6.31816	6.20557	18.4657	2.96696	10.102
CDK13	3.62313	4.73192	2.9426	3.97175	3.38865	3.10848	2.65613	3.91192	2.76654	2.70081	2.99388	2.6608	3.01175	3.03824	3.11019	2.8172	4.40848	3.7636	3.34296	3.4717	3.11695	3.01011	4.03344	2.92092	3.60837	3.35228	3.9782	3.19068	3.84845	3.34972	2.86964	4.16537	3.18959	2.51667	3.09224	2.35506	3.3233	3.38228	3.05261	2.79024	3.23139	4.15309	2.45568	3.8709	2.60175	2.81541	3.99312	2.95922	4.42813
MTHFD2	2.87958	3.64106	2.54485	3.85982	3.11814	3.21702	2.4557	4.07619	2.36136	2.80911	2.6494	2.54724	2.72826	2.80224	4.79897	2.65284	4.18649	4.30988	4.22249	3.98768	3.39277	2.52418	3.65846	3.09339	3.58208	3.81098	3.79725	3.31439	3.57266	4.56544	2.84239	3.79422	3.06426	2.99762	2.9566	2.15665	2.6692	3.09212	2.70232	2.8463	2.83097	2.86106	2.29448	3.36427	2.39265	2.90568	6.04323	2.74366	3.41623
SLC9A7	1.16047	1.24718	1.12624	1.24484	1.11034	1.11117	1.11829	1.32895	1.10389	1.10322	1.57594	1.11837	1.10423	1.13478	1.1254	1.10523	1.20876	1.32234	1.69094	1.12967	1.15001	1.12758	1.18993	1.15771	1.18014	1.12917	1.65763	1.12649	1.19085	1.12071	1.11779	1.19604	1.12331	1.10481	1.1444	1.12423	1.16608	1.41131	1.21379	1.12607	1.10891	1.10515	1.1557	1.29815	1.16206	1.18257	1.22994	1.13293	1.19947
FOXJ2	3.90174	6.58887	5.41253	4.80489	4.53613	4.06689	2.76182	4.4965	5.2927	5.84979	5.48118	6.06377	6.0314	4.09466	4.58692	4.13687	4.60962	4.58099	4.48941	3.89846	3.09759	5.26009	5.56715	3.54078	4.85536	5.9718	4.21519	4.94929	4.57467	5.54577	6.15669	4.02336	6.01252	4.10808	3.88637	5.19316	3.74509	5.81476	6.53528	4.32956	5.3186	4.62569	3.00109	6.42731	4.24577	4.94086	4.36295	5.04595	5.3729
YBX1	142.054	90.1927	89.3113	88.1851	134.283	103.764	109.561	118.867	92.8887	101.965	119.865	70.1268	97.2915	91.4123	53.9156	61.8599	145.232	175.112	40.3204	74.006	36.4909	74.3697	110.398	53.985	93.9749	101.007	90.2814	62.3215	109.38	60.6064	53.6594	123.895	32.1586	74.5509	114.263	29.5475	74.8726	126.172	87.4947	71.4798	106.939	108.667	86.4655	121.469	19.3655	65.0231	133.536	89.8863	51.0093
PDE4A	2.83797	3.83122	1.89924	4.36694	1.99847	1.95606	3.39305	4.34696	3.19094	2.55356	2.07893	3.49266	1.82549	2.38683	3.17958	2.16573	3.02162	2.84918	6.23958	3.11315	2.84453	4.85178	4.28762	5.23504	3.62118	2.00328	4.66835	4.03791	1.04221	3.02292	5.12193	3.66991	3.39458	1.63695	3.33173	3.39267	4.31195	5.17783	3.76319	2.5338	3.292	2.11783	1.50432	2.53975	4.43939	3.83549	4.44656	1.57838	2.27899
PPP2R5A	10.9297	18.8951	9.34273	16.139	11.3622	25.7234	4.74705	16.5272	7.4554	3.27039	11.9894	8.59127	2.49419	3.26384	5.50171	0.83267	12.8588	15.7692	6.47205	4.53685	2.22668	3.04793	15.7425	5.89395	9.57591	2.96155	10.871	13.6024	23.808	3.68189	3.59657	13.4309	7.19413	1.79623	3.81317	1.44044	7.72268	12.3259	11.5863	15.214	13.3831	24.2802	7.12412	30.1424	4.95764	2.68598	14.6507	7.92641	16.5146
CTNNA2	1.1432	1.28597	1.36553	1.36676	1.36904	1.33833	1.1599	2.34087	1.30918	1.14833	2.97912	1.18987	1.16519	1.60359	1.35739	1.13783	1.15257	1.16324	1.34778	1.15908	1.37091	1.1353	1.15167	1.13563	1.22204	1.18164	1.14418	1.33459	1.20559	1.15721	1.13498	1.13864	1.19858	1.15078	1.17334	1.18995	1.17724	1.21072	1.32872	1.15607	1.16755	1.24582	1.38101	1.19695	1.22595	1.73935	1.15314	1.23311	1.28621
ELAVL1	9.39833	9.49571	10.2516	10.6602	9.72578	7.42109	8.08426	10.5178	10.4888	10.1523	10.3372	10.7061	9.68299	9.8261	8.11554	8.77894	11.3305	10.1916	8.37472	9.35539	6.85199	10.2041	11.6082	9.50158	10.1154	9.32341	12.1308	10.8035	8.81169	9.95554	10.6397	9.79892	9.80038	8.90197	8.47945	8.15562	8.42693	8.17802	8.88822	11.091	8.26521	8.41118	4.56414	8.38793	8.01877	8.00564	11.4078	9.37392	10.7781
TIE1	2.17194	1.57927	1.7159	1.44204	1.17612	1.88378	1.42935	1.44372	2.24529	1.2779	2.07879	2.91017	1.28455	1.72163	1.65447	1.34621	2.25798	2.19249	1.45518	1.14861	1.57675	1.94583	1.41911	1.37487	1.63093	1.62803	3.95222	1.59349	1.1548	1.36578	2.67573	1.83457	1.32153	1.12278	2.16414	1.63636	1.55459	1.71774	1.7282	2.05533	1.25299	1.19331	2.56432	1.45999	2.00268	1.64392	1.67418	1.69351	1.62627
DIP2B	5.47525	13.3076	5.19391	11.1742	5.50992	5.7624	4.05564	10.6498	3.70779	4.50861	4.9553	5.19866	6.14976	3.68972	6.72459	4.12515	9.86121	8.57366	8.08594	7.27073	3.96439	5.25722	8.09007	4.18525	13.4493	9.33582	6.88061	9.1374	10.3214	9.39837	5.2008	7.07077	7.40485	3.54878	4.2739	2.96438	4.44071	7.48109	5.34304	5.07013	8.5523	9.13487	2.40179	4.67749	4.09231	6.68012	9.00718	6.4216	9.99311
SMARCD1	14.5606	14.2294	14.4298	12.2096	10.6446	11.4622	10.5099	15.2822	14.1427	16.928	14.5291	16.9964	13.8676	10.4129	11.8467	10.2013	17.1448	14.8167	6.84384	11.585	10.173	16.8177	15.9431	13.3327	19.1609	10.4462	12.0046	18.9797	10.8205	10.1983	19.6568	14.5121	12.0492	11.4002	13.3378	17.6465	10.9575	15.7905	17.0518	13.573	8.07457	11.7036	7.66862	6.70495	11.8507	19.0835	16.7604	9.23813	8.41975
KDM4A	5.84883	5.25567	4.26321	3.69383	4.44623	4.59205	3.53608	5.52843	3.90916	3.86761	5.51011	4.8329	5.84764	3.3961	3.51254	5.1499	5.77157	4.63321	3.12642	3.12871	2.71756	6.17151	4.90265	2.59883	4.58676	5.90547	4.99539	3.34579	4.14306	2.94324	3.08495	5.32432	3.39121	5.39841	4.75115	4.98915	3.84597	5.21412	5.28553	4.5426	4.38825	4.5599	3.60085	4.91363	3.37896	4.54395	5.31823	6.03075	3.24673
NFYC	6.92581	8.51834	9.31434	5.08076	8.47231	7.50636	7.40005	9.62192	8.12812	9.54702	9.95976	10.8857	10.6718	6.13709	3.93551	9.22772	8.40369	9.48751	3.4602	4.38739	4.21369	9.32575	8.50724	4.48244	4.84571	8.05191	8.70752	5.12794	6.43334	4.9756	4.85428	9.66719	5.39807	9.71268	8.26062	8.62044	5.61283	7.43789	8.35291	11.3509	6.61003	9.28746	5.96974	9.05271	7.11139	5.47351	8.13754	10.1198	4.06273
ZMYND12	2.59456	2.28142	2.9133	2.38504	4.24102	2.77799	3.94676	2.19422	3.20898	1.88705	2.03746	2.94595	2.13576	3.60221	2.53146	3.53475	2.68148	4.67506	2.64286	2.82145	2.34718	1.96372	2.84451	1.74026	3.56625	2.98998	2.75835	1.60039	3.86544	1.98498	1.89189	1.87832	2.02873	3.44242	2.46171	1.81797	2.46893	3.25605	3.26402	3.36043	3.23081	5.41027	2.48648	4.11093	1.90973	2.20589	2.08642	3.7027	2.25874
SLC9A3	2.2782	9.41819	1.05777	16.7264	1.13418	1.15357	1.20414	2.84132	0.996484	0.910184	0.904177	0.980669	1.45178	1.67472	0.850801	2.67906	8.92191	0.785107	3.57673	1.08985	1.26755	2.02957	0.929421	1.70612	1.16756	1.63442	2.23076	5.34287	1.67137	2.87257	2.24505	4.91479	1.39361	1.04598	0.856884	1.66962	2.32846	1.85127	0.719108	0.731654	1.13852	2.93172	0.598061	1.28276	1.26337	0.592282	0.990781	1.99992	2.28216
NGEF	1.0597	1.06237	1.0364	1.1317	1.04934	1.05043	1.03899	1.11107	1.03372	1.27137	1.19677	1.10364	1.12636	1.05327	1.19251	1.04191	1.04776	1.07808	1.20304	1.06438	1.18391	1.10723	1.03798	1.0891	1.03272	1.0891	1.0592	1.21699	1.03322	1.31898	1.06538	1.03965	1.16971	1.02905	1.04341	1.04767	1.09278	1.27053	1.06079	1.04057	1.05202	1.03615	1.09671	1.05319	1.17247	1.10539	1.07323	1.04843	1.1733
ASPM	1.54996	2.04292	1.23315	2.41684	1.60897	1.43997	1.28617	2.22068	1.2425	1.32327	1.58487	1.26543	1.48496	1.22453	1.96244	1.20379	2.31971	1.90577	1.49898	2.21352	1.37279	1.41456	1.75459	1.47664	1.43106	1.63248	1.66973	1.63818	2.39946	1.94024	1.35409	2.21323	1.56223	1.29479	1.55171	1.27156	1.4315	1.47021	1.23052	1.23388	1.21212	1.51914	1.2016	1.65921	1.2628	1.40974	2.55019	1.37118	1.51753
CD84	1.34214	1.71142	1.38114	1.36187	1.25705	1.46232	1.2476	1.87923	1.29923	1.20323	2.02396	1.31305	1.23251	1.54132	1.4006	1.22423	1.49951	2.01223	1.26005	1.19305	1.3436	1.26505	1.75669	1.19996	1.42005	1.53332	4.05032	1.21878	1.28923	1.30396	1.25005	1.95005	1.21196	1.18851	1.32396	1.2146	1.53896	1.64823	1.47405	1.35823	1.38142	1.27269	1.36832	2.41087	1.33396	1.6816	1.41396	1.31333	1.36051
SPI1	2.1812	3.98346	2.22667	2.54039	1.92329	2.3443	1.97302	7.54166	3.84287	2.26993	11.3695	4.00231	0.957267	9.55392	1.85714	1.7605	2.27967	8.76255	0.988822	0.521055	3.37814	4.31611	8.57421	1.13998	0.988594	2.31609	23.5668	1.36915	0.722776	1.29228	4.26729	11.9238	0.652063	1.06508	4.71963	2.58609	10.5586	6.70414	6.85347	4.99829	0.81972	1.21662	6.88921	8.79069	9.58054	6.47611	3.17475	2.38535	1.67739
MPPED2	1.52175	1.55489	3.70098	1.65825	5.68812	5.38363	2.74302	1.66767	1.9187	1.53607	1.85859	3.12075	1.74102	1.92822	1.54705	3.05426	1.60853	1.60677	6.7971	1.62844	1.52371	1.55931	1.68993	1.62373	1.57608	1.6357	1.56872	1.78112	7.68084	1.60304	1.52381	1.58853	2.50688	3.09094	1.55774	3.10634	1.68924	1.7318	1.92312	1.57049	1.84898	5.77235	1.55803	1.55489	2.21828	1.55921	1.5699	3.12085	8.7555
CLDN18	1.06212	1.08011	1.04786	1.06137	1.03957	1.04015	1.02954	1.05217	1.03535	1.02954	1.04936	1.03468	1.03924	1.03709	1.05068	1.02954	1.13415	1.08276	1.03303	1.07339	1.05607	1.03493	1.08516	1.04098	1.02954	1.03485	1.03783	1.06287	1.06593	1.05756	1.03957	1.13954	1.03369	1.02954	1.0593	1.02954	1.04173	1.03369	1.03742	1.03311	1.03767	1.05168	1.04355	1.07157	1.02954	1.04679	1.06983	1.02954	1.08773
ZBTB11	2.65748	4.02849	2.70201	3.25638	4.05436	3.40504	2.46543	3.0306	2.30997	2.24399	2.79148	2.19938	2.7359	2.50038	4.12959	2.19152	3.41347	3.37712	3.14758	3.10346	4.23806	2.15567	3.01071	2.27412	3.10207	3.61665	3.21618	2.46428	5.20116	2.94088	2.11588	3.51358	2.87007	2.33895	2.26716	2.03893	2.40551	2.56636	3.04722	2.24907	3.7703	4.86143	2.31603	4.66439	2.09214	2.58536	3.59921	3.01398	5.53933
ATXN3	2.41653	3.29023	2.23537	3.12046	2.76362	2.58411	2.14054	2.87526	2.12169	1.93895	2.28305	2.0597	2.23466	2.34991	3.27939	2.12569	3.06287	3.22432	2.88571	2.90527	2.85672	2.23466	3.1368	2.30049	3.2409	2.72034	2.9891	2.53854	2.98124	2.80715	2.09607	3.18197	2.24519	2.14305	2.31487	1.90328	2.78358	2.47216	2.40789	2.20048	2.5332	3.19792	2.18721	3.5271	2.10314	2.22287	3.07764	2.43107	3.56167
GOLGA5	7.51628	13.7111	6.48463	12.3152	8.41114	8.21834	5.28024	13.874	4.98377	3.10875	6.58029	3.57795	5.65962	5.48416	12.0731	4.03704	15.1304	14.9986	13.5801	8.9137	6.88905	6.56637	11.1889	6.27589	14.7512	8.37715	15.3047	8.45827	10.022	9.07034	4.48743	16.4393	6.00477	4.93695	4.75831	2.70628	9.23032	8.59421	7.8906	5.46153	8.89473	11.3612	3.14616	8.58885	4.31765	5.92474	16.5414	10.1858	13.2351
FGFR2	1.16019	2.2543	1.61002	1.94185	1.15212	1.37522	1.18639	2.4375	1.13067	1.32559	1.96346	1.42974	1.35409	1.22707	1.2015	1.63099	2.37942	2.23135	2.06808	2.04141	1.23229	3.34499	2.6845	2.02946	1.55866	1.18172	2.5441	2.5259	1.51545	4.01079	1.49218	2.42175	1.25057	1.53357	2.29545	2.40387	1.32805	4.74363	1.13289	1.29853	1.11825	1.40632	1.15378	1.2015	1.30423	1.12656	1.95499	2.45373	1.78674
LRRC40	3.59438	6.02736	3.0453	4.77521	4.35814	3.75093	2.92108	4.90404	2.8855	2.89066	3.04006	2.8708	3.27635	3.19589	4.33201	2.77485	7.30748	5.33477	3.93543	4.00191	3.33815	2.95944	4.53828	3.1418	3.65561	4.46044	4.79697	3.1171	5.08457	3.56586	2.92608	5.41721	3.04292	2.91631	3.13354	2.75818	3.19176	3.6692	3.23608	2.93268	3.77189	5.2219	2.95142	5.3995	2.79741	2.96286	5.5659	3.54458	4.56401
ISOC1	5.13869	7.12984	5.55741	5.92669	6.94475	7.04727	5.29323	7.12376	5.38269	5.51867	6.9185	6.31818	5.51478	4.37484	9.26143	4.26763	6.35416	7.29953	8.3099	4.68019	5.36397	5.56187	6.61858	5.10247	6.36324	6.12458	7.47838	6.14249	7.93219	4.29186	4.28157	6.56364	5.7365	5.37564	4.12355	3.03369	6.48957	4.34875	7.74993	6.27231	6.86388	6.91793	3.30524	8.70681	3.89178	4.61803	7.30537	7.52092	4.59737
EML1	1.59963	1.68349	1.39663	2.17777	2.01919	1.26027	1.7056	2.22662	1.28912	1.46192	1.93341	1.73907	2.4904	3.47531	2.90313	1.45933	1.81081	2.85043	2.70859	1.7106	1.70224	1.53885	1.65666	1.42884	1.31806	1.5176	2.90082	2.07785	1.13881	2.29345	1.59213	1.72185	1.97582	2.0216	1.63992	1.22536	1.7609	2.23652	3.16354	1.53472	4.31405	2.57492	1.94601	4.1523	2.35605	3.09931	2.16834	2.08708	2.80206
TRMT11	2.67736	3.54563	3.01497	3.97175	3.48308	3.52335	2.86612	3.04643	2.63084	2.50305	2.78031	2.48848	2.61469	3.18476	3.20875	2.36337	3.31623	3.85448	3.71272	3.66376	3.28697	2.55054	3.60953	2.69438	3.59839	3.09295	3.4881	2.74518	4.27827	3.28477	2.54087	3.40706	2.85829	2.5137	2.84152	2.43927	3.2276	2.91509	3.11192	2.78386	3.65372	4.53264	2.54491	3.93343	2.64627	2.92072	3.31476	2.90003	4.53374
THUMPD1	5.64018	10.317	5.47953	7.5168	8.42044	7.17429	4.54905	8.83298	4.50774	3.94965	6.23356	3.8984	5.14313	4.582	7.6985	3.61834	9.21649	7.98231	8.92586	8.94339	7.38213	4.51462	7.96463	5.5624	11.2043	7.82753	10.3771	6.04717	9.62668	8.45769	3.99832	8.34829	6.05311	4.36626	4.99649	2.98169	5.17545	6.35352	6.36596	4.58168	7.20137	9.13456	4.09895	8.99019	3.9455	4.87935	8.4659	5.86375	9.40194
MSANTD3	5.29484	7.02406	5.8217	6.23412	6.20093	7.04034	3.71576	7.39362	3.99228	3.44025	4.86448	5.1856	4.33793	3.39833	7.27974	3.48304	6.1635	6.67856	6.17482	7.30475	6.0589	4.56326	6.05363	4.05417	4.92189	5.6235	6.91898	6.27062	5.38898	11.9173	3.66204	7.41792	5.65772	4.62051	4.84214	2.87942	5.74651	6.37844	5.18796	4.08854	5.39071	6.41627	3.29389	5.79551	3.29255	3.60864	6.64749	7.00235	4.82044
KIF26A	1.34099	2.04875	1.80219	2.69732	1.4394	1.58394	1.74099	1.86507	1.81663	1.30553	1.52723	2.43504	2.2046	1.11736	1.54351	1.54993	2.07402	1.6692	1.26382	1.74372	1.22284	1.83187	2.03656	2.81146	2.44218	2.1831	1.53605	1.85505	1.41301	2.81643	3.08618	1.91584	1.44309	1.29671	2.07073	1.2611	1.63567	1.991	1.89684	1.36874	1.43307	1.1395	1.23728	1.05159	1.38109	1.72623	2.01659	1.16613	1.61795
ATG2B	3.11977	5.87486	3.34921	4.91452	3.64565	3.61062	2.38683	4.07343	2.5814	2.3635	3.16265	2.52885	2.85702	2.5565	3.30742	2.45784	4.60575	4.61533	3.42493	3.67943	3.27192	2.87996	4.2372	2.54008	4.88483	3.23311	4.34764	3.51235	4.49358	3.45556	2.78138	4.10885	2.74721	2.27851	2.86291	1.99487	3.53128	3.7132	3.32847	2.81775	3.97021	4.73748	2.25479	4.55532	2.25668	3.11348	3.7751	2.91908	5.02292
ARFGEF1	5.80771	20.5256	2.85567	15.5079	3.45723	3.6612	2.11994	16.2674	2.22385	1.87403	2.92071	2.11664	3.3239	2.5762	5.71563	1.6497	18.2572	12.5395	5.16645	4.61404	2.85828	3.8489	9.82173	4.31337	6.1884	5.08573	5.65696	9.16572	5.0809	3.42167	2.74738	16.7979	4.43011	1.98339	2.82211	1.54057	3.786	5.03151	3.47335	3.06809	4.42581	4.71418	1.68641	6.35037	2.20065	3.28666	21.6027	4.13152	4.63408
ACSM2B	1.01297	1.01297	1.01297	1.01297	1.01297	1.01915	1.02021	1.01957	1.01297	1.01297	1.01297	1.01297	1.01297	1.01297	1.01297	1.01297	1.01297	1.01744	1.01297	1.01297	1.01297	1.01297	1.01297	1.01297	1.01297	1.01297	1.01297	1.01297	1.01297	1.01297	1.01894	1.01297	1.01297	1.01297	1.01297	1.01297	1.01297	1.01297	1.01297	1.01297	1.01297	1.01297	1.01297	1.01297	1.01297	1.01297	1.01297	1.01297	1.01297
ZFAT	2.68495	3.35323	2.15856	3.46274	2.03531	1.80278	2.22343	3.64637	2.25033	3.2368	2.23315	2.88239	3.30136	2.23427	2.5931	2.4399	2.91884	2.74943	2.24503	2.08027	2.11632	3.26852	3.22315	2.60779	2.51594	2.68592	2.89532	3.01889	1.95052	1.79861	2.85903	3.21207	3.02949	2.26173	2.15671	2.32581	2.27121	2.38024	2.48751	3.11066	2.49474	1.83418	1.50385	2.7752	1.75541	2.8416	3.17168	2.31264	2.24254
MTFR1	4.28214	9.51777	2.8445	10.8734	3.63962	3.76166	2.24795	12.2449	2.32155	2.12491	3.21703	2.65889	3.01229	2.5708	5.89937	1.93645	12.2677	10.8874	3.3359	3.88856	2.83355	3.64208	9.31442	4.00689	5.26857	3.75201	4.9421	5.9833	4.16457	3.38574	2.87436	10.1966	3.2063	2.29462	2.44752	1.72554	3.83911	3.7939	2.93113	3.68343	3.0956	3.86726	1.87851	5.6873	1.91979	2.74738	15.7735	4.04114	3.87652
STAG3	1.06172	1.32574	1.14184	1.30015	1.19516	1.16723	1.20668	1.10423	1.19597	1.15805	1.18659	1.2025	1.18649	1.29292	2.49303	1.11993	1.22197	1.20331	1.21259	1.27569	1.55948	1.12146	1.15448	1.12727	1.04572	1.23858	1.31707	1.02217	1.21575	1.12981	1.05815	1.20566	1.28833	1.02166	1.06631	1.28486	1.16223	1.12044	1.32706	1.0817	1.11942	1.49404	1.05907	1.63553	1.13868	1.23298	1.13461	1.15601	1.83849
FECH	4.14248	4.58697	3.87084	4.65247	4.46728	4.35142	2.43021	4.44306	2.98075	2.44822	3.83729	3.17439	3.26706	2.3816	4.90882	2.64185	5.84289	5.23194	4.42895	2.89222	3.28937	3.09494	3.32579	2.79883	4.90834	3.85084	4.60705	4.17348	4.51414	2.94593	2.65086	4.37102	3.31384	2.63054	2.5134	1.93879	2.94824	3.88247	4.14017	3.59927	5.04755	5.26485	1.87926	4.13316	2.22263	3.38938	4.30791	3.71609	3.39177
MYO9A	3.17654	4.11948	3.25431	3.64763	3.50007	3.47936	2.90496	3.49494	2.89442	2.9381	3.13058	2.84523	3.09174	2.99583	3.81068	2.75435	3.69378	3.75218	3.06401	3.57347	3.2225	2.94978	3.36864	2.9569	4.04067	3.76386	3.34215	3.22231	4.25233	3.36484	2.80534	3.28403	3.31328	2.80876	2.92984	2.64382	2.87837	3.3337	3.07189	2.95851	3.78998	4.00316	2.73365	3.9571	2.86194	3.16856	3.38165	3.06278	4.52847
DDX3Y	1.16724	1.00084	1.00364	1.0045	7.89321	0.998029	1.00934	1.63722	1.08981	2.88854	0.998029	3.34238	0.998029	0.998029	1.14525	2.49693	0.998029	1.00037	8.82224	1.00045	1.12763	4.10828	0.998029	1.00154	14.0067	7.08535	8.884	1.05573	8.76586	0.998029	1.05932	1.62973	5.50807	2.90032	5.17682	2.12989	6.03279	6.01657	1.1667	1.00021	1.00052	9.72718	1.12209	0.998029	0.998029	0.998029	1.15453	5.03264	0.998029
PFKP	6.93872	13.303	5.93039	16.7744	2.28549	3.82506	1.54648	12.0641	2.77125	2.85879	6.85941	2.11772	5.12183	3.93926	5.24609	6.12741	13.2902	13.3907	6.51132	9.70322	4.35067	9.86877	14.37	11.2849	4.34488	2.50346	9.75076	17.1283	2.80333	10.9417	16.9643	13.4765	4.55615	3.19797	7.63407	4.28538	17.0165	12.5574	6.13313	3.3943	4.118	2.40297	1.56263	1.40188	6.63321	9.03484	13.5679	2.57987	4.44324
IDI1	5.21191	9.41501	4.28123	7.86298	6.98558	5.86301	3.95894	6.83539	3.51606	3.35806	3.94437	4.0957	4.72472	4.03292	15.7171	3.50755	6.13823	9.68034	7.33646	5.79324	6.39175	4.31902	6.53618	4.65626	10.9495	7.56545	8.01952	5.79432	9.39056	7.58906	3.62707	8.50465	5.73122	3.56267	3.83038	2.42438	4.44713	5.78036	5.45463	4.26337	5.97202	10.4743	3.09173	10.0669	3.07502	4.28107	8.89593	7.10686	9.85812
SP100	3.14168	7.0891	3.35398	5.31647	5.41163	4.23974	2.83382	5.9611	2.59725	2.33453	4.36216	3.24999	2.87116	3.24598	6.53081	2.09725	6.30787	5.5216	4.87902	4.44653	3.90471	2.92086	6.68261	3.79781	5.09975	4.16672	7.28447	3.41535	5.25604	4.21816	2.44056	8.64132	3.43189	2.51753	3.44441	2.03557	3.61788	4.04698	7.11313	3.00224	4.13631	4.50656	2.37408	10.9555	2.66571	4.55974	5.69893	3.53808	5.63149
KLF6	5.53912	8.56046	9.5676	12.2385	11.5028	20.1872	5.33519	9.25917	6.23523	6.30945	8.24137	11.1224	5.69775	8.43471	17.3161	2.53748	7.97609	10.2655	4.71756	9.66549	5.50616	2.74575	9.17711	6.2503	12.5386	12.9405	7.59762	7.50712	29.7107	16.864	5.26448	9.67516	9.96191	5.66296	4.2686	2.51861	5.36313	10.0681	7.38373	8.98635	8.52149	12.3751	4.08523	19.7534	3.68446	7.79401	7.34308	9.12801	27.321
NEO1	5.84196	13.515	34.3279	4.46532	20.2396	16.9653	11.3611	5.5807	13.7163	20.7316	17.1103	33.6752	12.8873	6.84569	11.3114	24.7593	7.1428	9.85513	7.76312	1.47087	12.5582	36.5155	12.2258	10.829	32.9572	16.0692	12.1918	14.1344	22.0033	6.8275	13.7347	3.97712	24.1677	20.5577	10.4011	25.1332	0.303442	18.3884	21.5997	22.6246	9.16837	22.9521	9.14478	26.1639	10.6787	24.1269	3.28435	23.5972	30.4348
TRAM1	22.8228	87.7883	6.00024	111.872	16.9887	10.4841	6.88589	76.2261	3.66035	2.5636	7.04817	9.60487	12.6039	12.7671	29.4563	2.09119	81.2149	71.9023	19.5927	35.8473	8.83847	27.0403	70.6127	38.1618	45.6661	27.615	39.8902	33.2218	20.5962	14.0755	13.1951	100.595	18.2739	5.33856	12.4022	-0.668858	20.4644	23.3785	11.9458	15.3682	18.156	17.1697	5.05657	33.4345	2.93007	9.68351	106.24	22.3407	27.0159
PHKA1	1.10092	4.37834	1.28262	1.19593	2.13417	3.14195	2.32706	1.74101	1.99009	1.1688	2.61705	2.08798	1.6051	1.66753	1.09188	1.6099	1.54571	6.76242	3.97029	1.61799	1.7326	3.28387	4.51833	1.52578	3.70096	1.50625	4.87915	0.941884	3.47828	1.03745	1.09556	2.84877	3.67887	1.85482	1.22595	1.91854	1.04714	1.23507	2.3277	6.16164	4.1383	2.17435	1.10981	1.20474	2.59608	1.4407	3.93748	4.29662	1.8858
TNFRSF1A	13.7546	22.2904	8.40339	16.3796	6.043	5.35243	5.30985	23.4246	12.3841	14.0994	15.9369	13.5599	10.7186	9.08487	8.88961	9.76833	19.5467	19.6144	11.7462	12.8907	6.36126	25.2813	22.7274	19.2395	13.1203	9.10811	23.1963	16.2778	3.78299	16.627	22.2228	26.9493	10.6876	6.64031	18.0634	12.6094	14.0817	21.8266	15.3353	10.3708	6.13749	4.90558	6.31616	6.86407	15.5597	11.6635	24.9891	8.26961	7.87008
CACNB1	1.14505	1.577	1.33226	1.54261	1.25701	1.2193	1.05653	1.44299	1.3793	1.07025	1.33519	1.03471	1.07018	1.26688	1.18082	1.07233	1.44661	1.28646	1.288	1.52172	1.38377	1.20442	1.47082	1.29001	1.08328	1.04111	1.55626	1.26202	1.1058	1.83685	1.35609	1.58664	1.14127	1.09516	1.30689	1.15746	1.43227	1.40914	1.78874	1.0327	1.2156	1.29903	1.16664	1.36488	1.1826	1.44422	1.49133	1.06802	1.2459
EVI5	2.19855	3.88428	2.36917	2.96019	3.33065	3.19907	1.9768	2.91126	2.11615	1.8563	2.49257	1.9834	2.11654	2.07923	2.31128	1.80234	2.55824	3.47015	2.85046	2.31992	2.42887	2.05457	3.04267	1.81491	2.57568	2.57168	3.46465	2.15559	4.24931	2.48715	1.84366	3.45562	1.97751	1.9365	2.0281	1.78655	1.95214	2.53067	2.35746	1.95253	3.04637	4.47774	1.83195	3.65491	1.9182	2.0387	3.33489	2.32329	3.27244
STOML1	2.55095	2.50453	2.56911	2.44482	2.72625	2.26128	2.4846	2.35572	3.13001	2.15974	2.49367	2.80253	2.27046	2.99355	2.34355	2.5794	2.42236	2.74843	1.56224	2.1194	2.3005	3.69755	2.13961	2.23648	2.56181	2.24743	2.6349	2.16283	2.27617	1.71714	2.18257	2.48722	2.4129	2.50228	2.56658	2.76724	2.31557	2.55881	3.56886	2.55311	2.6744	2.80019	2.82686	2.02309	3.6662	2.65166	2.43153	2.82115	3.17493
PKM	23.927	71.7228	22.9712	94.0862	29.9554	23.1747	30.4395	84.0938	23.7514	29.8402	62.079	24.9034	46.3061	24.7692	4.8428	75.9928	95.3124	120.022	32.8634	65.7936	2.93356	115.27	122.238	98.8531	89.9392	16.4395	56.0833	78.4529	17.7285	34.5622	102.542	93.1257	42.9359	56.7241	65.3896	114.557	67.9146	81.4112	41.9149	38.8555	18.6602	14.5576	11.8347	16.4637	66.1205	37.828	124.852	72.8229	27.3837
DHX29	5.49174	11.1857	5.46338	8.5629	7.53924	7.01507	4.34091	8.11055	4.28243	3.7246	5.31067	3.71014	4.22089	4.4565	6.87594	4.05629	8.31765	8.80293	8.31516	6.84284	5.5152	4.99858	7.32097	4.69083	9.5787	6.22894	7.95937	6.35129	9.96317	7.1922	4.24122	8.36818	5.37911	4.1804	4.64641	3.08066	6.03028	6.67896	5.32786	4.7322	6.12773	9.32035	3.29579	7.46637	3.6707	3.71649	9.40558	5.6671	5.16005
DNTTIP2	4.97293	8.60325	3.53576	5.25755	6.74263	4.80265	3.36664	7.35942	2.86036	2.46772	4.03099	2.24179	3.48597	3.15407	5.79936	2.55526	4.9308	8.71172	4.36602	4.82118	6.16439	3.13786	7.74325	2.52908	4.18826	5.40716	5.8665	3.7136	7.46682	4.31552	2.30662	9.8901	3.16956	3.21614	4.10152	2.1123	3.16458	5.21872	4.53166	2.84888	4.86811	8.50146	2.72322	7.59043	2.49453	2.75599	10.5645	4.88004	6.2994
METTL22	2.50684	2.98563	3.06587	2.84249	3.06596	2.65105	2.61863	2.48347	3.0942	3.28087	2.65018	3.4689	2.34403	2.44267	2.72116	2.323	2.6383	2.72331	1.73467	2.4527	2.39369	2.53956	2.34511	2.24286	3.32186	1.95454	3.05788	3.09849	2.77569	2.15279	2.52252	2.74716	2.1303	2.12017	2.6344	2.38581	3.17824	2.90247	4.4327	2.16857	3.39217	3.58643	2.79088	3.37999	2.26964	3.46977	2.76907	2.13585	3.17405
TP53BP1	3.77631	5.15287	3.45713	3.79593	3.27723	3.39851	2.24326	4.51127	3.11672	2.45356	3.56608	2.50435	3.26079	2.69821	3.77351	2.43727	4.97584	3.84974	2.87331	2.72962	2.76405	3.48528	3.6976	2.66657	3.72962	3.98064	2.99513	3.27956	4.77934	2.32313	2.67161	3.63673	3.32004	2.5249	2.45937	2.15339	2.67154	3.35858	3.7563	2.76389	4.72645	3.84788	1.89516	3.4918	2.21023	3.38106	4.24964	3.09694	4.49111
TRO	2.47269	6.36115	3.41126	2.81412	3.34131	2.84161	2.15852	3.18477	2.85626	2.3917	2.70099	2.55399	2.53351	3.45869	4.46935	1.84135	6.04461	2.73904	2.81892	2.64411	5.86523	4.01668	3.73197	3.19643	3.55779	2.27716	2.98381	2.53012	4.29524	2.01293	2.31127	5.38113	3.32012	2.53808	2.92914	2.80065	2.31159	3.55945	3.67864	2.85934	2.53752	3.98099	1.98056	5.08571	2.89558	3.92955	6.03752	2.73038	5.66931
RRP15	3.88892	5.64434	3.44325	6.18339	3.85671	4.10608	2.64547	4.20891	2.48012	3.20962	3.7726	2.70052	3.27565	3.22851	5.23654	2.51718	5.26731	5.04753	4.52171	4.09664	3.78159	3.29229	4.61167	3.05083	3.97573	4.29464	3.48346	3.93651	4.74535	4.04248	2.76826	5.09836	3.72788	3.34771	2.97554	2.3019	3.87362	3.70755	3.94901	3.07386	4.12129	5.77694	2.22877	6.75653	2.86668	3.2877	5.43814	3.59096	5.31301
RHOA	60.7081	33.6566	50.4825	52.2389	41.6612	44.3781	35.6946	44.2119	45.9284	63.6749	71.642	83.4503	58.6444	32.8828	62.9718	47.2451	31.3723	35.4329	16.1952	27.9949	26.8434	35.6352	43.7777	28.101	62.5711	61.0002	56.0311	36.5902	42.1842	34.1601	34.856	47.756	44.6127	52.0827	27.9971	50.0505	39.2138	44.8335	43.7184	88.5815	34.5664	44.4182	16.5597	56.5184	21.296	55.2864	39.696	61.0983	59.5216
DHX8	5.65787	6.61595	6.16423	5.95752	3.84905	4.62004	3.91387	6.88457	5.34934	5.48679	3.4243	6.44663	4.83012	3.92184	4.35816	4.00236	6.25272	5.29418	3.44199	3.55378	3.41778	6.77049	6.78926	4.6195	6.74551	4.83035	6.08707	5.94886	4.74262	3.16082	6.75669	5.43868	5.02817	3.85986	4.14893	5.33141	7.95872	5.67641	6.20621	6.31355	5.16899	4.12311	1.86678	4.77587	5.2666	8.59608	5.86818	4.15736	6.18238
PMS2P4	3.77863	2.90992	4.1064	2.72316	2.37169	2.50482	3.12725	3.08728	2.27028	2.26673	3.80355	4.01826	2.50768	4.05785	2.78984	3.69535	1.93256	3.19556	2.64227	2.53469	2.28541	3.66649	2.85173	1.92754	2.05233	2.11801	4.09436	5.67949	2.8197	2.60724	2.91834	3.8095	2.66303	3.40578	2.3054	3.30299	3.89609	2.83745	3.94903	4.12476	2.88098	4.89754	2.96881	4.80508	1.62647	2.7301	2.21865	4.06395	3.09924
PRKCZ	2.76537	4.45255	5.22948	2.78682	4.15442	4.73221	4.35749	3.51929	5.43238	2.4247	4.97949	5.4414	3.74372	2.245	2.40054	5.18335	4.14514	3.71378	2.89781	2.60335	2.11921	5.47282	4.18146	3.00127	4.34594	3.32882	3.49198	2.67784	4.43793	2.26723	2.73456	3.78486	2.3496	4.25762	3.54397	6.70483	2.71837	2.91068	5.10431	4.10365	4.35451	4.43986	2.35301	2.71601	2.60712	2.64721	4.10269	4.57921	2.50313
ZFY	1.25735	1.23686	1.23686	1.23351	2.90039	1.23351	1.23804	1.35343	1.2462	1.44561	1.23351	1.52301	1.23704	1.23351	1.27674	1.38551	1.23351	1.23351	2.54762	1.23931	1.24801	1.80509	1.23351	1.23351	3.33193	2.54463	3.12971	1.23759	3.8	1.23351	1.23713	1.33321	2.03867	1.4767	1.74264	1.28998	2.31902	2.02779	1.24792	1.23351	1.23351	3.25126	1.25399	1.23351	1.23351	1.24611	1.24955	1.83219	1.23351
IARS2	18.4708	27.8393	10.6673	36.5376	16.695	14.1041	9.21655	26.0059	7.65741	13.2614	14.3714	9.13588	12.9278	8.90583	20.7386	5.29132	30.1837	25.2515	24.5567	15.6423	9.19711	12.2221	18.8834	13.0507	19.0179	22.3192	16.141	18.1482	23.0061	22.1639	10.5611	23.158	15.7989	8.35158	8.583	3.22695	22.2133	18.6916	14.3093	10.8597	21.9942	22.5997	1.89518	35.5336	7.53823	12.4104	28.2286	13.0395	23.1578
SYT1	1.05418	1.52638	1.05279	1.22477	1.05356	1.05108	1.04867	2.7224	1.04851	1.04828	1.69393	1.04812	1.04797	1.04532	1.05224	1.04532	1.14247	1.05154	1.16306	1.12141	1.06701	1.04532	1.04532	1.04532	1.06009	1.05403	1.08612	1.04532	1.051	1.05185	1.04532	1.06693	1.04532	1.04532	1.04532	1.07058	1.04532	1.15428	1.11193	1.04532	1.05644	1.05737	1.20557	1.05185	1.06149	2.04093	1.04929	1.10221	1.20635
NAV3	1.28389	1.47538	1.5915	1.32588	2.28982	1.66831	1.3432	1.32095	1.56637	1.23112	1.40566	1.3738	1.36869	1.4306	1.27922	1.28918	1.33495	1.49396	1.99836	1.26603	1.35298	1.25732	1.34455	1.25643	1.28496	1.40512	1.25553	1.31413	1.70412	1.34607	1.26361	1.35379	1.64328	1.35343	1.32831	1.24225	1.40817	1.41068	1.74073	1.34212	2.05831	2.4745	1.37551	1.58908	1.33934	1.24521	1.28963	1.77582	1.90522
IDH3G	30.7134	15.9359	31.2619	26.8978	20.842	15.0136	33.777	30.1501	28.5478	38.7383	23.4273	47.7279	36.5394	27.7292	16.2512	62.9678	31.4134	34.0323	25.5254	37.9646	17.2411	54.5418	30.8579	50.2154	11.9884	17.5694	19.7161	41.8529	9.73193	42.5382	70.6126	26.6438	32.9878	50.1929	62.6425	62.3169	39.1964	46.3977	27.842	32.1712	15.4531	19.3108	24.3368	16.0679	69.5538	30.9831	26.3294	58.5811	16.2795
ROGDI	1.39906	1.67431	1.55283	1.54521	1.79431	1.44248	1.47556	1.89245	1.61416	1.29439	2.33471	1.34878	1.28427	1.82412	1.26731	1.41968	1.86186	2.03696	1.50178	1.43812	1.46879	1.60855	1.67789	1.53665	1.25446	1.11018	2.30319	1.80918	1.30878	1.33197	1.59205	1.93525	0.99096	1.42357	1.61548	1.20995	2.05626	1.39314	2.69899	1.56801	1.33314	1.55688	2.147	1.37859	1.50988	1.97836	1.95268	1.38054	1.2589
PDZD4	5.36452	5.93386	7.71038	5.56587	4.53403	2.65486	2.41324	5.00758	8.23145	3.84266	4.7723	6.33603	3.67899	7.87345	2.53794	4.81371	4.29913	4.54654	0.527271	4.16993	5.38008	8.67716	3.01675	4.98463	2.15064	1.47201	4.58856	13.2503	1.71622	2.25033	8.96088	6.93756	5.73671	1.68457	5.75883	2.60322	3.56108	11.0044	13.9131	2.30341	5.91579	7.17353	8.28316	3.19789	1.4232	8.92618	5.60583	2.34803	2.71701
ATP2B3	1.97462	1.16624	1.05773	1.20917	1.03233	1.01647	1.06428	1.41422	1.03233	1.24798	1.20071	1.78863	1.68477	3.55501	1.09646	1.20032	1.38471	1.02265	1.02982	1.04842	1.47713	1.25622	1.04934	1.13108	1.0366	1.20238	1.05925	1.24333	1.01403	1.02128	1.12773	1.07389	2.00009	1.64474	1.14092	1.09807	1.48887	1.39173	1.06589	1.55743	1.03432	1.02608	1.16967	3.92386	1.23388	1.18599	1.17173	2.15214	2.34591
ROCK1	2.60928	5.91726	2.76321	4.29577	3.80048	3.68354	2.20348	4.06568	2.4645	2.3022	2.77213	1.99953	2.59633	2.23256	4.15618	2.05141	3.99217	4.34555	3.31612	3.01888	2.48257	2.21845	4.19309	2.37765	3.58575	3.41003	3.54775	3.08146	5.81676	3.10736	2.27839	4.40914	2.88101	2.17339	2.24512	1.94324	2.13454	3.01369	2.82215	2.13059	3.4526	5.12202	1.98294	5.34947	2.12842	2.76259	4.43938	2.5488	5.86438
CBFB	3.51653	6.10677	3.93752	11.0432	5.59324	5.88612	3.60563	5.04001	3.42293	3.52355	3.57074	3.42972	4.36989	4.34317	4.32629	2.91719	10.0358	10.0323	5.50651	5.93719	3.72886	4.12198	8.96049	5.72991	7.83792	5.74487	7.06572	3.63877	6.44645	9.17763	4.1981	6.24702	4.47556	2.9701	5.6379	2.40671	7.51939	7.39563	5.58286	3.4666	3.87026	5.8781	3.20541	7.95252	2.81289	5.51834	6.56471	3.90721	6.82468
PDK3	3.34773	4.38193	4.74404	3.15378	4.13184	3.89775	3.33174	3.5642	2.79918	2.16977	3.20894	2.42262	2.34258	2.9662	2.68911	2.4675	3.15958	4.18537	4.957	3.13608	2.65533	2.75601	3.51255	2.63387	2.2432	2.53922	3.85483	3.96866	4.79862	2.51303	2.51858	3.92957	3.06795	2.31647	2.57488	2.21888	1.98381	3.12221	3.54013	3.03392	5.91613	4.41024	2.50234	4.0336	2.94515	2.57316	2.91863	3.05897	3.91162
HYAL2	4.22211	4.47532	5.3933	3.79745	6.95176	5.21034	6.67148	3.72093	7.25863	6.80341	8.35433	8.12342	5.82121	8.84693	7.04876	5.61619	4.76607	4.37276	3.20721	2.78636	7.74861	3.82714	3.35763	3.68926	3.04775	6.86588	7.63717	3.2134	4.36419	3.72173	3.69688	5.17898	5.94067	5.76311	4.17734	6.85548	4.78599	3.3458	5.89281	8.09771	4.72503	5.39671	7.0028	4.73853	4.739	6.44034	5.52625	6.41002	6.69085
HDAC4	6.93389	14.7039	5.29316	17.914	4.27313	7.03817	3.05059	8.57294	3.72187	4.37107	3.7907	7.25567	3.84655	5.50492	5.31256	5.04449	13.0179	9.77234	5.16046	8.82275	4.12371	7.04764	11.5039	4.81951	9.06454	5.15145	6.58645	8.76477	7.44153	8.40946	9.02642	8.78807	4.80393	4.21393	6.67545	3.85174	5.89324	10.1011	4.17825	8.07195	6.27422	5.28941	2.43599	3.78298	4.40614	9.42528	8.39441	3.6716	12.1232
RASSF1	4.84819	4.72846	8.15807	5.59393	6.08151	6.71019	5.86258	5.27524	9.90544	4.7922	5.36756	5.72579	6.49213	8.48184	6.3872	5.86791	4.32983	4.52582	3.28936	6.13084	6.07956	3.08022	5.1011	3.86504	3.91844	8.15024	6.69359	4.19484	6.28596	5.73182	6.26215	7.73641	5.66323	6.16608	3.83599	7.72357	3.74774	6.51969	7.56752	5.89703	5.99687	6.47396	4.36726	4.64179	5.84207	5.36294	6.80447	6.99709	8.57698
FGFR3	1.96958	3.62476	1.50802	6.39445	1.73904	1.55692	1.78982	2.80563	1.64945	5.70748	2.212	4.19626	3.78206	2.17611	3.59888	1.53056	3.25165	2.99613	2.04933	3.70133	2.33951	2.75941	2.86829	2.95341	3.60523	4.90911	2.48281	3.23277	1.346	4.01617	3.40773	3.03454	4.48376	2.03818	2.03492	2.75379	2.20939	2.33129	1.75817	2.32731	1.52511	1.49036	1.49776	2.68723	1.78534	2.66859	4.46455	2.04314	3.21113
IFI35	9.8017	19.7566	7.05921	16.8761	7.61115	6.66175	7.65998	29.1398	6.05725	8.53869	6.79101	16.5704	6.37176	12.7687	15.7943	14.1668	12.2598	12.6408	13.4323	13.6465	8.36921	22.3888	32.2054	29.9208	17.7448	4.24277	55.6783	10.6037	3.38058	10.4111	13.9476	47.4036	8.59643	10.5624	10.4182	17.4805	30.7392	14.9642	39.8132	23.2327	7.03788	6.42699	2.68285	10.0954	19.772	15.8177	16.5593	5.36226	3.85178
HEATR6	3.92435	5.09941	4.01223	4.09904	3.85205	3.52574	3.14571	4.658	3.41781	4.80766	5.80656	5.51449	4.66933	3.78651	5.3398	3.32619	4.4472	4.48584	3.54946	3.51808	3.95386	3.78708	4.07915	3.52867	5.15166	4.57616	4.40399	4.2139	4.36772	3.76597	3.56332	4.54583	3.70972	4.37734	3.40999	3.28135	5.03216	3.80558	4.60232	3.89998	4.30406	4.20917	2.94583	6.7925	3.7067	5.25991	4.71009	4.4979	4.93344
COASY	18.6613	19.7882	21.3796	15.9537	13.2109	14.793	17.0357	23.1037	19.2968	16.3487	13.2855	33.2929	17.5942	9.1771	15.4093	18.9244	25.977	19.9946	13.791	15.3198	10.6695	25.8996	20.998	18.4942	23.8079	15.0435	19.1822	21.0647	12.3297	15.7562	24.0733	23.4703	17.2795	18.1151	17.0129	20.8521	25.0283	17.7968	21.617	20.6706	10.8566	13.9497	5.55184	10.594	18.6446	24.9383	25.2252	17.6694	12.728
PLEKHH3	3.23742	5.88989	2.09698	4.67003	2.36586	1.77192	2.40606	3.39893	2.83286	2.42159	1.79286	3.0399	4.07137	1.88987	2.83484	3.19699	4.36506	3.65135	2.68057	3.21168	2.46652	3.9822	4.4208	3.70595	3.44058	2.55531	4.13899	4.68693	1.20478	3.81255	5.62002	5.19323	3.62165	2.71034	3.02185	2.91875	5.94966	3.84042	3.60132	2.50185	2.0216	2.27852	0.986625	2.76813	3.25029	3.86829	4.16115	3.7728	2.96566
MEF2A	3.35553	6.95813	3.15333	6.53186	4.32228	4.92434	3.09206	4.72206	2.87162	2.79528	4.15369	3.07799	3.87901	2.77728	6.44617	2.21934	6.85745	5.52987	3.93874	4.31703	3.58478	3.40622	5.01513	3.28777	6.36311	5.11387	5.38538	3.86873	7.11939	3.20765	2.69476	5.06164	3.83234	2.60629	2.93428	2.04163	2.74281	3.78173	3.46664	2.95182	4.76448	5.45106	2.36707	6.92599	2.5872	3.89454	5.11032	3.8097	6.18277
OTUD5	15.7594	11.6252	19.9516	12.7117	12.2242	11.4531	15.4939	14.0484	21.5311	22.1861	18.7208	26.1393	19.9585	10.1165	15.4139	20.1842	11.7648	16.5938	13.3705	12.3007	10.225	21.5773	16.7393	13.2226	9.80325	16.8461	14.1391	18.6359	11.7519	12.4937	21.9099	13.5465	18.902	23.6648	14.0248	39.1863	9.29288	15.7008	19.5874	15.9621	12.339	12.7033	7.5335	14.6456	24.8468	10.6619	12.0724	19.4101	13.0044
TFE3	7.17359	14.3928	8.30196	11.3577	5.39583	6.3616	6.47249	13.3634	8.9064	8.39206	9.8075	13.832	8.07682	7.60963	6.41423	9.71801	10.8253	12.1766	8.05557	10.1065	5.1729	16.7131	14.0475	10.1167	9.02461	7.25059	14.9247	13.1357	5.33483	9.32622	15.5829	13.2293	9.44245	7.88961	9.82174	17.5364	10.5166	13.2641	10.9179	9.11334	6.87746	7.17808	3.51747	8.79383	16.58	6.97647	11.9945	10.3103	9.30497
TBC1D25	4.90467	5.03194	5.73834	4.50777	4.03793	5.17659	4.09189	5.489	6.9044	3.90706	5.39532	7.19446	4.8263	3.22431	5.52979	4.38348	4.65418	5.03562	3.21979	3.30038	3.27314	6.30438	5.17146	4.05018	3.03757	4.9411	5.06715	4.21457	4.3694	3.89803	6.27759	4.45848	5.19595	5.09309	3.49455	7.37569	3.10943	5.14284	6.79679	9.02544	5.57089	4.51535	2.98874	4.92197	5.16435	3.18153	5.17276	5.79406	4.32608
ACSL4	2.1297	7.12055	2.1739	6.74909	4.3423	4.55618	1.69091	4.80975	1.58128	1.71841	2.61592	1.78858	2.14387	2.19658	4.25765	1.46768	6.0673	5.14926	6.13472	2.89492	3.18096	2.02912	5.16428	2.72975	2.31026	4.19974	5.13095	2.95796	5.31473	2.47703	1.88648	6.74289	3.38649	1.87193	1.71825	1.3517	2.1474	3.15009	2.45972	1.85906	3.68403	4.15377	1.49204	5.75812	1.43719	1.66731	6.81819	2.69513	5.32408
INPP5A	6.92778	13.3584	7.6192	12.0604	7.57854	7.85885	5.00883	8.10055	7.76427	5.5268	7.28154	6.15506	8.14342	11.0239	7.51203	5.88315	9.15762	9.04794	7.48999	6.81292	4.85469	7.38382	8.65674	7.88836	7.89965	8.98204	7.24035	8.67314	6.72436	7.03678	7.99179	8.87373	9.30666	5.35992	5.87606	5.05666	3.79114	9.6746	9.88107	6.51164	10.7848	8.52013	3.15983	8.08362	5.01402	9.10614	8.29574	6.8152	10.5757
GPKOW	10.7669	11.4218	10.272	11.7345	8.93896	8.02813	8.81324	13.5418	11.4765	11.2782	13.5404	12.8886	10.3436	8.2831	13.6898	10.6337	11.0364	11.5682	9.00524	10.4178	8.09494	13.9741	13.5133	10.8609	8.44983	9.62885	12.2031	14.0093	7.77239	13.3309	12.1307	12.6409	10.7175	12.4719	8.94349	11.9598	11.275	11.9966	15.8653	13.5434	9.18748	9.59429	5.18134	12.2654	11.9261	8.74827	12.418	12.2409	12.6145
GRIPAP1	5.57876	8.94639	5.90207	6.90894	5.50657	5.54305	3.9602	7.66532	5.9766	4.65609	6.08068	5.61626	6.05074	4.59683	5.28274	5.93637	8.26516	6.90403	6.96383	6.0965	5.58663	8.86001	10.7351	5.56028	5.05158	5.55194	8.55471	8.25549	5.34355	6.53831	6.96266	9.36715	6.97638	6.24104	7.26905	7.62946	4.6256	8.07852	6.88586	5.9228	4.66076	7.71974	3.40831	5.30706	5.4495	5.09587	7.87021	6.53894	6.69681
FTSJ1	8.17843	9.75566	8.38815	10.3322	8.71937	6.63428	4.89117	10.3921	8.49415	7.40563	9.67402	7.67194	4.92531	6.77404	6.16543	5.08302	11.2399	12.9055	5.22896	6.52354	6.1429	8.31468	11.2538	9.74619	5.36025	5.09157	11.0204	10.175	6.05095	7.6643	10.5847	12.7569	5.43158	4.32396	8.42198	4.52642	8.23419	9.22625	10.87	9.78247	10.0845	7.95925	4.14426	7.96093	8.14109	6.14298	14.8501	4.47953	12.1722
PRR11	4.26783	4.1415	3.72139	4.42537	3.96404	4.1546	3.8768	5.09345	3.71926	4.00185	4.54424	4.09644	4.70093	3.82226	5.06565	3.86657	5.26111	4.59729	4.3687	5.04509	4.23374	4.14853	4.45924	4.31097	4.65375	4.64597	4.49024	5.05873	4.71925	5.0272	4.11508	4.60624	4.69316	4.8524	4.51186	3.79063	4.28295	4.34718	3.90982	3.90119	3.73918	4.03871	3.82972	4.65108	3.79616	4.93815	5.2168	4.81683	3.94913
REEP1	3.26175	6.77575	2.22835	5.03258	2.33233	2.07439	1.84942	3.84096	2.08538	1.83961	2.1486	1.93449	2.0165	2.00303	2.32288	1.89704	4.16058	3.45849	2.19432	2.42497	2.01768	2.9243	2.5137	2.62855	3.03265	2.15226	3.04789	2.85328	1.84198	2.09743	2.2892	5.50591	2.17802	1.80239	2.62879	1.81338	1.85415	2.95939	2.94297	1.92693	3.02107	2.53272	2.35478	1.82579	1.8968	2.0289	4.91985	1.85509	2.01874
ATP11A	2.57055	10.3755	7.1989	7.59744	2.58204	6.59168	3.2372	7.99774	3.56687	3.02396	5.1268	7.53215	8.08746	3.20379	6.2821	3.69266	11.2393	2.84679	21.9406	4.68336	3.47654	5.70723	5.15595	2.70882	6.46155	6.81124	5.13898	6.94411	16.7023	2.43889	3.33149	3.24519	23.4424	6.36239	1.74081	3.8301	2.99831	1.93829	2.20982	8.57877	3.57554	4.56175	0.632691	4.05986	1.23199	3.92576	6.12069	12.7421	6.29382
POLR1A	6.78277	9.1053	9.85987	6.2305	4.88213	6.12958	4.25456	8.10522	5.86714	8.08753	7.48572	14.175	5.37486	4.43508	5.29864	5.43671	9.34036	6.48433	3.26501	3.34669	3.56691	6.86207	6.72623	4.18002	5.78561	6.34418	6.5854	5.58385	8.50519	3.82258	8.86017	5.68877	5.76953	4.43454	5.39955	6.84207	5.59516	6.49994	6.30703	9.23306	6.52186	5.43855	2.31069	8.02191	6.22481	11.4314	12.8851	3.68636	7.75024
LAPTM4A	78.96	146.87	78.3987	134.859	112.285	70.802	51.1075	158.697	74.1655	57.5626	93.3236	134.395	75.5079	63.2684	70.4912	48.7683	189.888	114.718	83.097	106.87	38.3638	103.547	196.816	76.9384	106.444	84.8554	115.98	101.963	61.0761	123.413	80.8943	172.563	134.148	63.2038	60.285	42.953	87.5049	126.646	130.095	78.3933	114.459	102.431	43.1	195.946	54.0455	85.6067	228.783	117.868	155.188
TTC7A	1.73557	2.30927	2.01355	2.10838	1.62875	2.28861	1.47655	2.73929	1.72727	1.1624	2.28492	2.01516	1.6028	1.42848	1.45805	1.62299	2.21965	2.60068	3.14728	1.37834	1.15542	2.21297	2.72877	1.30884	2.07751	1.38671	4.09809	1.37488	2.22802	1.44706	1.46465	2.61251	1.40022	1.35699	1.64234	1.55818	1.77934	1.79024	1.86227	1.78663	1.39492	1.86488	1.28911	1.78671	1.83808	1.83248	2.6165	1.76298	1.52493
IP6K2	6.40168	4.84839	6.09354	4.5533	8.98685	8.02655	6.5436	5.24945	6.28633	5.74851	6.83931	6.55001	9.51029	6.10933	11.1508	5.64028	5.73788	4.68514	4.86199	4.71499	8.61384	4.44241	4.68342	3.15842	4.81846	8.58125	4.9564	4.10762	8.0822	4.40209	2.9865	5.79376	6.31228	7.47623	4.42944	7.01546	4.73031	4.55745	9.4838	5.59018	6.19255	10.6685	5.90114	10.7214	4.13396	8.87814	6.34323	7.96161	10.657
SRBD1	3.40897	4.33731	3.55486	3.9165	4.21684	4.17804	3.00395	4.67785	2.61655	2.43767	3.90396	3.17817	3.1186	2.38035	3.63918	2.35393	6.86395	5.06127	3.95422	3.01085	2.34255	3.48523	4.26586	2.7842	4.92618	3.60072	4.21476	3.80036	5.88451	4.22664	2.39539	4.30698	3.24505	2.70378	2.78321	1.62008	3.06584	3.63245	3.23566	3.44652	4.28621	4.72513	1.90064	4.3948	1.66727	3.65331	5.54829	3.66078	4.27483
KIF2A	2.45291	3.72794	2.29227	3.37913	2.87228	3.20292	1.89584	3.4657	1.86263	1.74978	2.51284	1.77489	1.96829	1.95551	2.76456	1.66744	3.90748	3.68268	2.66061	2.31692	2.24592	1.86659	3.40405	1.94021	3.24926	2.62066	3.09699	2.57404	3.93052	2.29182	1.79064	3.64983	2.33375	1.73619	1.95002	1.51751	2.26572	2.48341	2.74827	1.79388	3.09798	3.41494	1.60696	3.52249	1.6723	1.95884	3.83297	2.20515	2.4691
RASGRP2	1.2453	1.42135	1.21538	1.53204	1.24779	1.21507	1.14185	1.4289	1.23003	1.15455	1.27996	1.24756	1.23992	1.43132	1.30504	1.16654	1.3429	1.20791	1.17464	1.17784	1.26898	1.2104	1.25254	1.28191	1.20105	1.29476	3.26512	1.18757	1.15345	1.21476	1.28175	1.6231	1.21126	1.12557	1.24366	1.16498	1.43848	1.27357	1.32429	1.24374	1.16506	1.18664	1.197	1.19988	1.31361	1.27389	1.62871	1.20128	1.29788
PSME4	5.99298	13.1785	5.2489	11.3169	5.49217	6.14425	3.33135	10.2047	3.42809	2.88577	4.63281	4.23206	3.56477	3.54895	5.74017	2.98444	13.9313	9.70566	7.07979	6.27907	4.59503	5.30677	10.6025	6.12486	6.44725	4.46377	10.7042	6.75297	6.30778	7.70147	3.84613	12.198	5.32453	3.61015	5.21531	2.58897	6.4751	6.57246	4.70642	4.02199	5.60007	6.12455	2.61093	7.9857	3.61364	5.02417	14.1125	5.5443	5.99725
IFT80	2.06616	3.13006	2.07544	2.51377	3.56771	2.6563	1.9556	2.25129	1.9717	1.89166	2.05979	1.94398	2.21261	2.34698	2.77122	1.91704	2.51298	2.26481	2.99591	2.7834	2.98943	1.81587	2.44893	2.01485	2.26604	2.37246	2.10104	2.13625	3.74669	2.38208	1.91066	2.64154	2.23631	1.97438	2.1765	1.81654	2.17303	2.27253	2.59928	1.89781	2.54004	3.95148	2.17214	2.95701	1.86997	2.40935	2.60286	2.41863	3.99978
SIRT2	7.04881	7.30828	10.2051	7.71685	10.9435	6.39507	10.6225	7.42618	14.1596	15.6655	9.66277	17.0653	13.9487	17.5846	8.28289	10.0851	6.78328	9.26219	8.28904	7.78878	7.71131	10.0998	8.27498	11.567	7.21544	10.2663	10.1072	9.56216	5.51353	12.4141	11.8659	7.32534	10.9018	9.63833	11.1011	14.8693	14.4826	10.9553	9.9675	10.2181	6.39285	11.2647	6.73309	12.7032	7.56813	7.73729	6.13461	12.1631	11.1087
[truncated: 16,661 more rows]
[truncated: 31 more columns]

## Sheet: GSE22138
geneNames	GSM550623	GSM550624	GSM550625	GSM550626	GSM550627	GSM550628	GSM550629	GSM550630	GSM550631	GSM550632	GSM550633	GSM550634	GSM550635	GSM550636	GSM550637	GSM550638	GSM550639	GSM550640	GSM550641	GSM550642	GSM550643	GSM550644	GSM550645	GSM550646	GSM550647	GSM550648	GSM550649	GSM550650	GSM550651	GSM550652	GSM550653	GSM550654	GSM550655	GSM550656	GSM550657	GSM550658	GSM550659	GSM550660	GSM550661	GSM550662	GSM550663	GSM550664	GSM550665	GSM550666	GSM550667	GSM550668	GSM550669	GSM550670	GSM550671
[truncated: 17,661 more rows]
[truncated: 14 more columns]
