# Supplementary material for: Tryptophan metabolism-related gene expression patterns: unveiling prognostic insights and immune landscapes in uveal melanoma
Source: Aging (Albany NY). 2023 Oct 13;15(20):11201–16. doi: 10.18632/aging.205122 (PMC10637787; doi:10.18632/aging.205122)
Supplement: Supplementary File 2 [file aging-15-205122-s002.xlsx]

## Sheet: gene
Supplementary File 2. The list of tryptophan metabolism-related genes.
Gene	Type
AADAT	tryptophan
AANAT	tryptophan
ACAT1	tryptophan
ACAT2	tryptophan
ACMSD	tryptophan
AFMID	tryptophan
ALDH1B1	tryptophan
ALDH2	tryptophan
ALDH3A2	tryptophan
ALDH7A1	tryptophan
ALDH9A1	tryptophan
AOC1	tryptophan
AOX1	tryptophan
ASMT	tryptophan
CAT	tryptophan
CYP1A1	tryptophan
CYP1A2	tryptophan
CYP1B1	tryptophan
DDC	tryptophan
ECHS1	tryptophan
EHHADH	tryptophan
GCDH	tryptophan
HAAO	tryptophan
HADH	tryptophan
HADHA	tryptophan
IDO1	tryptophan
IDO2	tryptophan
IL4I1	tryptophan
INMT	tryptophan
KMO	tryptophan
KYNU	tryptophan
MAOA	tryptophan
MAOB	tryptophan
OGDH	tryptophan
OGDHL	tryptophan
TDO2	tryptophan
TPH1	tryptophan
TPH2	tryptophan
WARS1	tryptophan
WARS2	tryptophan
