# Supplementary material for: Tryptophan metabolism-related gene expression patterns: unveiling prognostic insights and immune landscapes in uveal melanoma
Source: Aging (Albany NY). 2023 Oct 13;15(20):11201–16. doi: 10.18632/aging.205122 (PMC10637787; doi:10.18632/aging.205122)
Supplement: Supplementary File 3 [file aging-15-205122-s003.xlsx]

## Sheet: Supplementary File 3
Supplementary File 3. The tumor infiltrating immune cells calculated based on CIBERSORTx.
Mixture	B cells naive	B cells memory	Plasma cells	T cells CD8	T cells CD4 naive	T cells CD4 memory resting	T cells CD4 memory activated	T cells follicular helper	T cells regulatory (Tregs)	T cells gamma delta	NK cells resting	NK cells activated	Monocytes	Macrophages M0	Macrophages M1	Macrophages M2	Dendritic cells resting	Dendritic cells activated	Mast cells resting	Mast cells activated	Eosinophils	Neutrophils	P-value	Correlation	RMSE
TCGA_TCGA-WC-A88A	0.000636755	0	0	0	0.0380581	0	0	0	0.0524038	0.091104	0	0.0514027	0	0.408671	0.0165413	0.319165	0	0	0.0220165	0	0	0	0.029	0.187516	1.05292
TCGA_TCGA-V4-A9EU	0.0186029	0	0	0	0	0.129827	0	0	0.0399547	0.0499187	0	0.110611	0	0.132285	0	0.434227	0.00530209	0	0.0792719	0	0	0	0.179	0.0647189	1.07771
TCGA_TCGA-VD-A8KE	0	0	0	0	0	0.33539	0	0.0259589	0.00547008	0	0	0.114723	0.0109713	0.024271	0.0032347	0.365855	0.0601869	0	0.0539391	0	0	0	0.381	0.0213468	1.08807
TCGA_TCGA-RZ-AB0B	0	0	0	0.201437	0	0	0	0.109503	0	0.00352827	0	0.186993	0	0.0554267	0.0546524	0.223976	0.0598723	0	0.103871	0	0	0.000740779	0.821	-0.0222861	1.11666
TCGA_TCGA-WC-A87U	0	0	0	0	0.00629988	0.35256	0	0	0	0.0492825	0	0.108365	0.0339961	0	0.00542894	0.399628	0.0128795	0	0.0315605	0	0	0	0.552	0.00156117	1.10352
TCGA_TCGA-YZ-A983	0.0449856	0	0	0	0.0556172	0.204287	0	0.00738955	0.0469361	0	0	0.087913	0.0353816	0	0	0.372696	0.0680403	0	0.0767538	0	0	0	0.626	-0.00506991	1.08644
TCGA_TCGA-V4-A9EC	0	0	0	0	0.0692339	0.210494	0	0	0	0.082767	0	0.205087	0	0.104963	0	0.228293	0.0593073	0	0	0	0	0.0398538	0.118	0.0881733	1.08227
TCGA_TCGA-V3-A9ZX	0	0	0	0.299888	0	0.0218715	0	0.0893168	0.124197	0.048934	0	0.0513297	6.94283e-05	0	0.12466	0.150393	0.0244413	0	0.0648994	0	0	0	0.083	0.107895	1.07341
TCGA_TCGA-V3-A9ZY	0	0	0	0	0	0.227509	0	0.00918285	0.138359	0	0	0.117656	0.00135557	0.0507326	0	0.363276	0.0341027	0	0	0	0	0.057826	0.219	0.0529633	1.08229
TCGA_TCGA-V4-A9ET	0	0	0	0	0.117659	0.130752	0	0	0	0.0113716	0	0.169743	0	0	0	0.483549	0.0139024	0	0	0	0	0.0730228	0.206	0.0555406	1.09089
TCGA_TCGA-WC-A884	0	0	0.00193603	0.0902444	0	0.0865473	0	0.0237831	0.0823303	0.00660876	0	0.0451244	0.00903307	0.140724	0.00905292	0.47112	0	0	0.0275693	0	0	0.00592564	0.062	0.12671	1.05386
TCGA_TCGA-VD-AA8S	0	0	0.00669928	0	0	0.0860695	0	0.0204062	0.0230164	0	0	0.0588853	0	0.104678	0	0.62599	0.0463748	0	0.0278799	0	0	0	0.115	0.0889347	1.0932
TCGA_TCGA-VD-A8KB	0	0	0.013078	0	0.142568	0.159005	0	0	0	0.0852699	0	0.28738	0	0.012431	0	0.255828	0	0.015732	0	0	0	0.0287067	0.765	-0.0167697	1.16446
TCGA_TCGA-V4-A9F2	0.0121918	0.00986258	0.0288588	0.0444123	0	0.0393477	0	0.023386	0.0148011	0.0253393	0	0.0932751	0.0693269	0.0495382	0.0226748	0.40019	0.0304252	0	0.136371	0	0	0	0.2	0.0581595	1.0634
TCGA_TCGA-WC-AA9E	0.0335947	0.0197289	0.0953129	0.143336	0	0	0.0301234	0.087333	0.0467583	0.0120178	0	0.0828887	0	0	0.0074809	0.309058	0.0198124	0.0676928	0.0119103	0	0	0.0329528	0.015	0.226999	0.991927
TCGA_TCGA-V4-A9E9	0	0	0	0	0.114642	0.166697	0	0.0214379	0	0.0978148	0	0.161208	0	0.0525928	0	0.285707	0.0276566	0	0	0	0	0.0722435	0.265	0.0433194	1.09495
TCGA_TCGA-V4-A9EX	0.0227303	0	0	0	0.0227078	0.288903	0	0.00145954	0.0309666	0.0169336	0.029531	0.00702926	0	0.261952	0	0.307395	0.00776089	0	0.00263049	0	0	0	0.199	0.0582562	1.088
TCGA_TCGA-V4-A9F1	0	0	0	0	0	0.072428	0	0.0236772	0	0.0363506	0	0.0652971	0	0.1249	0.0107302	0.518433	0.0880213	0	0.0601624	0	0	0	0.045	0.144162	1.0531
TCGA_TCGA-VD-A8KH	0	0	0	0	0.126472	0.354997	0	0	0	0.0115941	0	0.13834	0	0.254274	0	0.0722528	0	0	0.0420715	0	0	0	0.472	0.0105493	1.12037
TCGA_TCGA-WC-AA9A	0.037138	0	0	0	0.0470977	0.502839	0	0.0148623	0	0	0	0.168634	0.0447536	0.0991293	0	0	0.00612494	0	0.0625495	0	0.0168716	0	0.885	-0.027794	1.14917
TCGA_TCGA-WC-A881	0	0	0	0	0.0125589	0.149082	0	0.00305573	0	0.059679	0	0.123206	0	0	0.0405217	0.517926	0.0305942	0	0.0633766	0	0	0	0.141	0.0767354	1.07418
TCGA_TCGA-VD-A8KI	0	0	0	0.34938	0	0	0	0.021086	0.118329	0	0	0.0682222	0.0391366	0.0314171	0.0116019	0.201293	0.0761496	0	0.0780771	0	0.0053077	0	0.22	0.0525188	1.07814
TCGA_TCGA-VD-A8K8	0.0160984	0	0	0.465114	0	0	0	0.0732689	0.0398197	0.0252594	0	0.134388	0.00956187	0.0157084	0.0419858	0.0753816	0.0239393	0	0.0794742	0	0	0	0.045	0.147435	1.07769
TCGA_TCGA-V4-A9F5	0	0	0	0	0.019209	0.311055	0	0	0.0024348	0.103131	0	0.0779557	0	0.34243	0.0341264	0.109659	0	0	0	0	0	0	0.146	0.0742128	1.08985
TCGA_TCGA-V4-A9EO	0	0	0	0	0.155447	0.215318	0.0159108	0	0	0.0368134	0	0.0779345	0	0.110488	0	0.340307	0.00725713	0	0.0350715	0	0	0.00545267	0.6	-0.00287658	1.10187
TCGA_TCGA-V4-A9F4	0.003781	0	0	0	0.0108983	0.183697	0	0	0	0.0477294	0	0.100761	0.0006897	0	0.00830438	0.538424	0.049708	0	0.0543719	0	0	0.00163494	0.272	0.0416687	1.08923
TCGA_TCGA-VD-A8KM	0.0227565	0.0511041	0.0391678	0.332964	0	0	0	0.0695035	0.0825428	0	0	0.0787856	0	0.092883	0.0600866	0.112855	0.0150623	0	0.0422882	0	0	0	0.022	0.205708	1.01433
TCGA_TCGA-V4-A9E7	0	0	0	0	0.0636942	0.235386	0	0	0.00160241	0.075279	0	0.252931	0	0.0840022	0	0.25058	0	0.0161916	0	0	0	0.0203343	0.421	0.0160734	1.13515
TCGA_TCGA-VD-A8KO	0.00208642	0	0	0	0.0986931	0.366769	0	0	0.00428368	0	0	0.171658	0	0.0515029	0	0.1843	0.0953084	0	0.00708268	0	0	0.0183161	0.851	-0.0247554	1.12819
TCGA_TCGA-V4-A9ES	0.0446174	0	0	0	0.0373144	0.573732	0	0.012438	0	0.0312128	0	0.124714	0.0199289	0.112622	0	0	0.00520951	0	0	0.037689	0.000522145	0	0.857	-0.0252618	1.16231
TCGA_TCGA-V4-A9EQ	0	0	0	0	0.0314582	0.0724002	0	0.0337791	0.0429592	0.0858095	0	0.0483355	0	0.0679309	0	0.472303	0.0517378	0	0.0782813	0	0.0150052	0	0.164	0.0688324	1.07
TCGA_TCGA-V4-A9EL	0.0133836	0	0.0257662	0.295905	0	0	0.0662774	0.0698114	0	0.0911042	0	0.0389866	0	0	0.0746103	0.21399	0.0342133	0	0.0759522	0	0	0	0.088	0.104243	1.0527
TCGA_TCGA-VD-A8KA	0	0	0	0	0.119978	0.211156	0	0	0	0.125586	0	0.147555	0	0.135323	0	0.163445	0	0.0352077	0	0	0	0.0617481	0.611	-0.00360141	1.12017
TCGA_TCGA-WC-A885	0.00144304	0	0	0	0.147084	0.274661	0	0	0	0.0160595	0	0.14851	0	0.106199	0	0.284228	0.00199847	0	0	0.00127882	0	0.0185372	0.494	0.00765571	1.11178
TCGA_TCGA-VD-A8KK	0	0	0.00322824	0.196536	0	0.00831932	0	0.0426314	0.172501	0	0	0.0895605	0	0.137874	0.0374534	0.231874	0.0401387	0	0.0161983	0	0	0.0236851	0.261	0.0440904	1.08377
TCGA_TCGA-V4-A9EA	0	0.0543062	0	0	0.100049	0.0959654	0	0.0275097	0	0.0318746	0	0.214454	0	0.0744641	0	0.295488	0.0542731	0.0116137	0	0	0	0.0400013	0.411	0.0178194	1.10331
TCGA_TCGA-VD-AA8O	0.0276208	0	0	0.280155	0	0	0	0.0356404	0.0747688	0	0	0.0899993	0	0.0178253	0.0142875	0.275637	0.0917609	0	0.0923054	0	0	0	0.489	0.00847099	1.08816
TCGA_TCGA-V4-A9F0	0.0248206	0	0	0.129403	0	0	0	0.0343237	0.0686534	0.00696433	0	0.0348901	0.00405956	0.175631	0.00854516	0.407059	0.0119583	0	0.0936921	0	0	0	0.044	0.150547	1.03593
TCGA_TCGA-V4-A9EH	0.0235636	0	0	0.225743	0	0.00423843	0	0.0234414	0.0887881	0	0	0.158062	0.0291431	0.0681748	0.0644313	0.123413	0.0171851	0	0.172239	0	0.00157762	0	0.349	0.026529	1.09139
TCGA_TCGA-VD-A8KG	0.0410363	0	0	0.12	0	0.0466926	0	0.00210966	0.0756366	0	0	0.0574992	0.127568	0.0294938	0.0240534	0.280416	0.0358762	0	0.146461	0	0.013157	0	0.548	0.00202519	1.07322
TCGA_TCGA-VD-AA8R	0	0	0	0	0.122298	0.174708	0	0	0	0.0995311	0	0.160349	0	0.0514278	0	0.347993	0	0.0139465	0	0	0	0.0297467	0.634	-0.00561918	1.11923
TCGA_TCGA-WC-A87T	0	0	0	0	0.0835573	0.196606	0	0	0	0.0747976	0	0.231577	0	0	0	0.343993	0	0.0149366	0.038472	0	0	0.0160603	0.473	0.0104302	1.1252
TCGA_TCGA-VD-AA8Q	0	0	0	0.0109167	0	0.121507	0	0.0463526	0.0508981	0.0223634	0	0.0444056	0	0.211872	0	0.389758	0.0184431	0	0.0834841	0	0	0	0.021	0.206771	1.01469
TCGA_TCGA-V4-A9EK	0.00366715	0.00985836	0.0308478	0.205754	0	0	0	0.0322735	0.0728182	0	0	0.0415865	0.0243992	0.0314967	0.0124864	0.449	0.0161787	0	0.0593946	0	0.0102393	0	0.173	0.0665121	1.06382
TCGA_TCGA-WC-A882	0.0296471	0	0	0.0117665	0	0.0628764	0	0.0488929	0.0501861	0	0	0.0954696	0.0491838	0.137953	0.00452997	0.332272	0.00866268	0	0.157238	0	0.0113221	0	0.076	0.114319	1.04233
TCGA_TCGA-YZ-A982	0.0126404	0	0	0	0.008461	0.305801	0	0.00851219	0.0332691	0.0231498	0	0.123621	0.0191553	0.106411	0	0.251493	0.00767293	0	0.0919315	0	0.00788155	0	0.427	0.0155002	1.08866
TCGA_TCGA-V4-A9EI	0	0	0	0.131546	0	0	0	0.0821361	0.0414171	0.0218126	0	0.0602716	0	0.257415	0.0526851	0.327782	0	0	0.01338	0	0	0.0115544	0.094	0.10159	1.06818
TCGA_TCGA-V4-A9EJ	0	0	0	0	0.0487295	0.156274	0	0.0581394	0	0.140132	0	0.0889204	0	0.101393	0.00624448	0.344924	0.0389753	0	0.0162679	0	0	0	0.43	0.0153153	1.09766
TCGA_TCGA-WC-A87W	0	0	0	0	0	0.386652	0	0.0126727	0	0	0	0.118482	0.00762842	0	0	0.402749	0.018242	0.017369	0.0239261	0	0	0.0122786	0.772	-0.0178975	1.11258
TCGA_TCGA-V4-A9F8	0	0	0	0	0.0449981	0	0	0	0.147648	0	0.0914948	0.0790399	0.045707	0.143445	0.00487291	0.174728	0.24947	0	0	0	0	0.0185962	0.167	0.0680782	1.0696
TCGA_TCGA-VD-AA8P	0	0	0	0	0.261389	0.0777037	0	0	0	0.0108813	0	0.14611	0.00395475	0.00854673	0	0.401755	0.0026029	0.0342835	0.0527735	0	0	0	0.386	0.0206161	1.09338
TCGA_TCGA-VD-A8KD	0.0218712	0	0.0715383	0.283777	0	0.0198889	0	0.0742631	0.0775698	0	0	0.0767763	0.000925656	0.119475	0.0813957	0.0971796	0.01647	0	0.0588695	0	0	0	0.04	0.161842	1.03039
TCGA_TCGA-V4-A9EE	8.52887e-05	0	0	0.255248	0	0.00335183	0	0.116488	0.0800272	0	0	0.0516068	0	0.167977	0.0432835	0.260743	0.0211895	0	0	0	0	0	0.417	0.0170871	1.10064
TCGA_TCGA-V4-A9EW	0	0	0	0	0.180223	0.129559	0	0	0	0	0	0.213225	0.00264881	0.131735	0	0.269043	0.00438422	0	0.0643222	0	0	0.00485883	0.492	0.00801189	1.11049
TCGA_TCGA-YZ-A985	0	0	0.00719468	0.00430911	0	0.0377003	0	0.0398301	0.15156	0.0218548	0	0.143134	0	0.179203	0.0357889	0.319165	0.00662443	0	0.0251105	0	0	0.0285246	0.159	0.0697965	1.07779
TCGA_TCGA-VD-A8KL	0.0506323	0	0	0	0.0900732	0.265641	0	0.0271834	0.0166154	0.169725	0	0.0724151	0.0133696	0.0643622	0	0.150782	0.00642761	0	0.0514223	0	0.0213509	0	0.903	-0.0295201	1.11993
TCGA_TCGA-VD-A8K9	0	0.0229696	0.0255213	0	0.0379998	0.0909564	0	0.0431026	0	0.0605927	0	0.174302	0	0.107324	0	0.264118	0	0.0594905	0.039924	0	0	0.0736986	0.564	0.000440863	1.09853
TCGA_TCGA-V4-A9ED	0	0	0	0.172269	0	0.0230617	0	0.0626073	0.0777221	0	0	0.0720807	0.034217	0	0.0271263	0.443464	0.0318963	0	0.0555556	0	0	0	0.124	0.0851158	1.05981
TCGA_TCGA-V4-A9EM	0	0	0	0	0	0.326262	0	0.0263625	0.0162223	0	0	0.127256	0.00418579	0.120484	0	0.345072	0	0	0.0341555	0	0	0	0.385	0.020701	1.09785
TCGA_TCGA-VD-AA8T	0	0.0512758	0	0	0	0.122413	0	0	0.0582078	0.0421677	0	0.145016	0	0.143748	0	0.39661	0	0	0	0	0	0.0405615	0.617	-0.00420727	1.11433
TCGA_TCGA-V4-A9EY	0	0	0	0	0	0.249875	0	0.0261784	0.00117576	0	0	0.103558	0	0	0.00931809	0.56552	0	0	0.0443754	0	0	0	0.118	0.0887532	1.07178
TCGA_TCGA-VD-AA8M	0.017585	0	0.00447846	0	0.0261192	0.407156	0	0.0219537	0	0.00295521	0.00157007	0.0712994	0.0158451	0.1924	0	0.0797706	0.0105535	0	0.0550062	0	0.0933078	0	0.195	0.0593979	1.07375
TCGA_TCGA-WC-A883	0	0	0	0	0	0	0	0.0428747	0.0287463	0.0382432	0	0.12966	0	0.444889	0	0.190243	0	0.000459971	0	0.0939443	0	0.0309391	0.18	0.0643072	1.12807
TCGA_TCGA-VD-A8K7	0	0.103126	0.0414693	0	0.125808	0.132969	0	0	0	0.0455039	0	0.186257	0	0.0356333	0	0.215395	0.0209998	0	0	0	0.0372647	0.0555744	0.999	-0.124179	1.15327
TCGA_TCGA-V4-A9E5	0.00857639	0	0	0	0.0182929	0.177548	0	0.0389743	0.0276023	0	0	0.0927754	0	0.123632	0	0.471561	0.00309079	0	0.00674482	0	0	0.0312017	0.095	0.100354	1.06727
TCGA_TCGA-V4-A9EV	0	0	0.00130563	0.387331	0	0.0546439	0	0.075203	0.0892832	0.0288619	0	0.0725959	0.00155838	0	0.0793381	0.141833	0.0297838	0	0.0342372	0	0	0.0040245	0.002	0.438617	0.904044
TCGA_TCGA-YZ-A980	0	0	0	0.0658383	0	0.105078	0	0.132349	0	0	0	0.0886313	0	0.0925876	0.00313971	0.457076	0	0	0.0263198	0	0	0.0289807	0.124	0.0846424	1.0691
TCGA_TCGA-VD-AA8N	0	0.04315	0.00512308	0.175181	0	0	0	0.0369711	0.0725451	0.0116359	0	0.0814404	0	0.101295	0.0787195	0.288406	0.0222824	0	0.08325	0	0	0	0.042	0.15792	1.02319
TCGA_TCGA-VD-A8KN	0.00775008	0	0.00992005	0.229524	0	0.00672167	0.00126551	0.0411461	0.0592491	0.0318407	0	0.0456298	0	0.0286473	0.0508199	0.44776	0.00941417	0	0.0222795	0	0	0.00803212	0.064	0.124433	1.04691
TCGA_TCGA-V4-A9E8	0.018354	0	0	0.186068	0	0	0	0.0342853	0.130956	0	0.0249371	0	0	0.175708	0.0399974	0.350646	0.016648	0	0.022399	0	0	0	0.011	0.261907	0.985167
TCGA_TCGA-V4-A9EZ	0.0313965	0	0	0	0	0.209435	0	0.011925	0.104773	0	0	0.171275	0.0537959	0.159935	0	0.122787	0.0146893	0	0.104529	0	0.0154593	0	0.418	0.0164823	1.09011
TCGA_TCGA-VD-A8KF	0	0	0.00488054	0	0.010551	0.183196	0	0	0.0122579	0.0651674	0	0.13155	0.00712945	0	0.0390616	0.43234	0.0707692	0	0.0101039	0	0.0081545	0.0248382	0.696	-0.0112363	1.10813
TCGA_TCGA-WC-A888	0.0143814	0.00657364	0.0471159	0.304998	0	0	0	0.0888917	0.0920979	0	0	0.100877	0.0130895	0.0496718	0.0786706	0.113493	0.015551	0	0.0745872	0	0	0	0.063	0.125392	1.05257
TCGA_TCGA-V4-A9F3	0	0	0.00908457	0.529315	0	0	0.0328564	0.0784409	0.0631716	0.0199749	0	0.0450653	0.00536088	0.0276262	0.049933	0.0962234	0.0126607	0	0.0302873	0	0	0	0.141	0.0767536	1.11426
TCGA_TCGA-VD-A8KJ	0	0	0	0	0.018903	0.180266	0	0	0	0.0687349	0	0.115319	0	0.187619	0	0.391374	0	0	0	0	0	0.0377846	0.078	0.11131	1.06762
TCGA_TCGA-V4-A9F7	0	0	0	0	0.115187	0.182493	0	0.00597957	0	0.0751478	0	0.210299	0	0	0	0.349736	0	0.031934	0	0	0	0.0292232	0.684	-0.00994274	1.13119
TCGA_TCGA-V4-A9EF	0	0	0	0	0	0.20195	0	0.0265511	0.0561219	0	0	0.133468	0.00983346	0	0	0.476034	0.0139641	0.035787	0.0462904	0	0	0	0.209	0.0547831	1.07945
TCGA_TCGA-WC-A880	0.0439136	0	0	0	0.0846063	0.186465	0	0.00741919	0.0159067	0.0178321	0	0.11486	0.0404628	0	0	0.354512	0.0271759	0	0.105358	0	0.00148895	0	0.834	-0.0233806	1.09508
TCGA_TCGA-WC-A87Y	0	0	0	0.503798	0	0	0	0.0821092	0.157767	0	0	0.0758472	0.0210065	0.0202611	0.00532711	0.079851	0.0138058	0	0.0402269	0	0	0	0.149	0.0733745	1.13085
TCGA_TCGA-YZ-A984	0	0	0	0	0	0.138446	0	0.0159252	0.0471447	0	0	0.187854	0	0.151705	0.0139626	0.151089	0.0525981	0	0.209734	0	0	0.031541	0.119	0.0876863	1.06164
GSE22138_GSM550623	0.00351717	0	0.00720308	0.340071	0	0	0.0161853	0.0962703	0.0517542	0.0978336	0	0.104653	0	0.0457516	0.078333	0.0744038	0.0180425	0	0.0659812	0	0	0	0.069	0.121637	1.07911
GSE22138_GSM550624	0.161424	0	0.0786278	0.207269	0	0.234776	0.0651015	0	0.069161	0	0.0729202	0	0.0445587	0.0458694	0	0	0	0.00888967	0	0.0114032	0	0	0.014	0.238616	1.00999
GSE22138_GSM550625	0.120825	0	0.0315552	0.0532937	0	0.107432	0.0268835	0	0.0837988	0	0.0424925	0	8.15814e-05	0	0.0432343	0.363921	0.126482	0	0	0	0	0	0.023	0.197757	1.00313
GSE22138_GSM550626	0.123758	0	0.0271604	0.0818128	0	0.131641	0	0	0.0922532	0	0.0161886	0.0302478	0.0294089	0.0661411	0	0.306621	0	0	0.012647	0	0.0821203	0	0.022	0.201089	1.00222
GSE22138_GSM550627	0.0482458	0	0.0647337	0.294886	0	0	0.0149029	0.0367635	0.0203765	0.109453	0	0.0441496	0	0.0582391	0.0724733	0.165764	0.0400684	0	0.0299449	0	0	0	0.016	0.225478	1.00152
GSE22138_GSM550628	0.277286	0	0.0509132	0.0685103	0	0.251844	0.0307935	0	0.0736553	0	0	0.00972765	0.0451728	0	0	0.192098	0	0	0	0	0	0	0.007	0.322319	0.960858
GSE22138_GSM550629	0.0770298	0	0.104181	0.199844	0	0.100382	0	0	0.182365	0	0	0.0771802	0.0252684	0	0.0144441	0.170403	0	0	0.0150167	0	0	0.0338859	0.018	0.219821	1.00881
GSE22138_GSM550630	0	0.00410276	0.00916064	0.411922	0	0	0	0.0653379	0.0665281	0	0	0.0401867	0.000819682	0	0.100205	0.233009	0.011628	0	0.0541896	0	0	0.00290941	0.178	0.0654063	1.08586
GSE22138_GSM550631	0.146679	0	0.0641782	0.0533801	0	0.00826845	0.00870623	0	0.0285667	0	0.0318583	0	0.0132681	0.191633	0.013486	0.439976	0	0	0	0	0	0	0.011	0.260286	0.994178
GSE22138_GSM550632	0.0347693	0.0202844	0.0297584	0.0978956	0	0.00745561	0	0.025848	0.0788196	0	0.0037338	0.0475274	0	0.353683	0.0202136	0.280011	0	0	0	0	0	0	0.033	0.183505	1.0358
GSE22138_GSM550633	0.122848	0	0.0336466	0.0526558	0	0.127043	0.0602192	0	0.0147084	0	0.0779922	0	0.0336161	0.0255632	0	0.439433	0	0	0	0.0122736	0	0	0.028	0.19026	1.0099
GSE22138_GSM550634	0.166199	0	0.058006	0	0	0.193591	0.116443	0	0.0204843	0	0.10956	0	0.0284165	0.145866	0	0.151447	0	0	0	0.00998736	0	0	0.01	0.274505	0.9719
GSE22138_GSM550635	0.191174	0	0.0312963	0.117861	0	0.250036	0.0226793	0	0.0995946	0	0.0985108	0	0.0483584	0	0.0752667	0.0603324	0	0	0	0	0	0.00489023	0.021	0.207317	1.01916
GSE22138_GSM550636	0.130202	0	0.0352094	0.0507183	0	0.219433	0	0	0.0986556	0	0.105993	0	0.0125123	0.126494	0.079412	0.14137	0	0	0	0	0	0	0.028	0.189148	1.0129
GSE22138_GSM550637	0.179679	0	0.107319	0.0188265	0	0.241161	0.0835833	0	0.124131	0	0.0669785	0	0.0337783	0.102678	0	0.0147999	0	0.00246243	0	0.0179636	0.00663888	0	0.007	0.310606	0.964573
GSE22138_GSM550638	0.186279	0	0.0457924	0.0352822	0	0.0454226	0.0572603	0.0100748	0.122233	0	0	0	0	0.00155129	0	0.479302	0.0168019	0	0	0	0	0	0.011	0.26216	0.984942
GSE22138_GSM550639	0.0171121	0	0.0248351	0.350599	0	0	0.0822996	0.0443977	0.0348713	0.103777	0	0	0	0	0.110775	0.201353	0.0029688	0	0.0146016	0	0	0.0124092	0.063	0.125816	1.05625
GSE22138_GSM550640	0.162927	0	0.0277658	0.162407	0	0.068559	0.0445454	0	0.12082	0	0.101624	0	0.0105595	0.114177	0	0.170616	0	0	0	0.0127196	0	0.00328022	0.017	0.224311	0.998763
GSE22138_GSM550641	0.00987563	0.0119784	0.0232928	0.303784	0	0	0.0047581	0.0193728	0.0934846	0	0.0168304	0.0183476	0.0485907	0.0754011	0	0.308555	0.0105097	0	0.0475114	0	0.0077078	0	0.085	0.105966	1.04784
GSE22138_GSM550642	0.0448739	0	0.0138497	0.0540138	0	0.0972515	0.0119333	0	0.0458078	0	0.053915	0	0.00127372	0	0.047824	0.424247	0.195783	0	0	0.00581564	0	0.00341176	0.1	0.0961283	1.05201
GSE22138_GSM550643	0.0598667	0	0.0170226	0.00558326	0	0.0965141	0.0535908	0.0295535	0.0155844	0	0.0372369	0.00730835	0.0469995	0.0741428	0.180167	0.171309	0.17087	0	0.0342512	0	0	0	0.077	0.113354	1.04318
GSE22138_GSM550644	0.168063	0	0.0933552	0.0711452	0	0.146377	0.000422571	0	0.115548	0	0.0990581	0	0.0112836	0.0305221	0.005981	0.244795	0	0	0	0.00685663	0	0.00659196	0.007	0.303057	0.964129
GSE22138_GSM550645	0.189557	0	0.124834	0.208848	0	0.00453904	0.0675752	0	0.0805799	0	0.0035268	0.0303799	0.031265	0.057789	0	0.188786	0	0	0	0	0	0.0123208	0.004	0.369406	0.934096
GSE22138_GSM550646	0.1565	0	0.0483936	0.278187	0	0.0171863	0	0	0.07098	0	0	0.0860018	0.0696909	0.0340899	0	0.151595	0.000472969	0	0.0532774	0	0	0.0336244	0.012	0.247401	0.989362
GSE22138_GSM550647	0.167532	0	0.0485404	0.15588	0	0.0716921	0.0204937	0	0.0533044	0	0.0759435	0	0.0274742	0.0139618	0	0.339052	0	0.0110278	0	0	0	0.015098	0.011	0.261694	0.979831
GSE22138_GSM550648	0.0271613	0.0226677	0.0764697	0.0770384	0	0.235378	0.0110531	0.00655578	0.0384206	0	0	0.00335908	0.0675951	0	0	0.280215	0.00324795	0.0580728	0.0927647	0	0	0	0.032	0.184198	1.00414
GSE22138_GSM550649	0.125917	0	0.134947	0.209937	0	0.0641171	0.0350992	0	0.0653809	0	0.0250253	0.0441887	0.0336017	0	0	0.250457	0	0	0	0	0	0.0113295	0.007	0.317155	0.959462
GSE22138_GSM550650	0	0.0418596	0.00913922	0.0393417	0	0.0480751	0	0.111109	0.0848267	0.0729486	0	0.0721043	0	0.272838	0.0597475	0.153996	0.00183154	0	0.0234829	0	0	0.00869949	0.045	0.144445	1.03861
GSE22138_GSM550651	0.17992	0	0.159137	0.142024	0	0.0923694	0.0333352	0	0.0846629	0	0.110738	0	0.0114493	0.00846021	0	0.110314	0	0	0	0.0512374	0	0.0163541	0.004	0.362092	0.942365
GSE22138_GSM550652	0.0928973	0	0.0290543	0.0999866	0	0.0693732	0.00972365	0	0.0739623	0	0.0743391	0	0.0230877	0.0755146	0.0048257	0.447236	0	0	0	0	0	0	0.042	0.157173	1.02878
GSE22138_GSM550653	0	0.0569585	0.0804911	0	0	0.23841	0	0	0.0992394	0	0.0305221	0.0388775	0.0455574	0.108824	0.146302	0.0706996	0	0	0.0841183	0	0	0	0.036	0.18054	1.01416
GSE22138_GSM550654	0.171106	0	0.140707	0.00296112	0	0.279569	0.0204863	0	0.0822223	0	0	0.033755	0.049466	0.0248104	0	0.176204	0.0187127	0	0	0	0	0	0.006	0.349017	0.945166
GSE22138_GSM550655	0.0919294	0	0.0522437	0.199432	0	0.103391	0	0	0.171611	0	0	0.0902833	0.0391175	0.0367662	0	0.179418	0	0	0.00658841	0	0	0.0292189	0.039	0.167905	1.03136
GSE22138_GSM550656	0.260517	0	0.0775318	0.0697401	0	0.148022	0.00467566	0	0.0989441	0	0.0478111	0.0369137	0.0364317	0.00145153	0.00246165	0.200495	0	0	0	0	0	0.0150051	0.006	0.344019	0.948913
GSE22138_GSM550657	0.206476	0	0.0573847	0.00228291	0	0.2215	0	0	0.170097	0	0.00883287	0.00542972	0.000441247	0.24484	0.00313418	0.0708164	0	0	0	0.00876436	0	0	0.008	0.285214	0.978468
GSE22138_GSM550658	0	0.0270533	0.0928629	0	0	0.327481	0.00383518	0	0.11509	0	0.0881927	0.0154869	0.0688487	0.136659	0	0	0	0	0.12449	0	0	0	0.042	0.15706	1.02665
GSE22138_GSM550659	0.1189	0	0.154984	0.317809	0	0	0	0	0.0817515	0	0	0.0649983	0	0.100721	0.0363964	0.0795729	0	0	0.0336545	0	0	0.0112112	0.006	0.33756	0.95437
GSE22138_GSM550660	0.236737	0	0.0630159	0.103087	0	0.118315	0.0354234	0	0.118438	0	0.0349854	0	0	0.154967	0	0.130184	0	0	0	0.000688876	0	0.00415886	0.006	0.335171	0.951308
GSE22138_GSM550661	0.0437461	0	0.0709204	0.336965	0	0	0	0.0666724	0.0989387	0	0.0286084	0	0.00771224	0	0.022113	0.315045	0.00614397	0	0	0.000505802	0	0.00262888	0.033	0.183748	1.02293
GSE22138_GSM550662	0.0140011	0	0.0407144	0.363269	0	0	0.0271682	0.0857976	0.0288618	0.00692915	0	0.068208	0	0.123341	0.058678	0.111237	0.019087	0	0.0527072	0	0	0	0.043	0.151234	1.03907
GSE22138_GSM550663	0.00149	0	0.0474572	0.474975	0	0	0	0.0414884	0.0626992	0.069466	0	0.0620027	0	0.00856775	0.0594438	0.158692	0	0	0.0137187	0	0	0	0.044	0.149324	1.06983
GSE22138_GSM550664	0.030373	0	0.0118423	0.477994	0	0	0	0.0714271	0.0349399	0.0533873	0	0.0330028	0	0	0.0460341	0.213597	0.0130696	0	0.0143335	0	0	0	0.103	0.0938543	1.08852
GSE22138_GSM550665	0.0929099	0	0.0259535	0.0718815	0	0.0306183	0.00943902	0.00740582	0.0910531	0	0.0338624	0.00429348	0	0.344423	0.0257171	0.262443	0	0	0	0	0	0	0.032	0.184089	1.03123
GSE22138_GSM550666	0	0.102462	0.0346456	0.140639	0	0.0500551	0.024328	0	0.107233	0	0.0888799	0	0.0516181	0.0334868	0	0.366652	0	0	0	0	0	0	0.028	0.18977	1.0101
GSE22138_GSM550667	0.0134615	0	0.00592191	0.484341	0	0	0.000752404	0.0873725	0.0365092	0.0989958	0	0.056962	0	0.049702	0.0639803	0.0578977	0.00926767	0	0.0348358	0	0	0	0.057	0.13014	1.0925
GSE22138_GSM550668	0.00619849	0.0738058	0.0417528	0	0	0.34031	0.0091219	0	0.175312	0	0.0553877	0.0116429	0.10113	0.0447156	0	0.140623	0	0	0	0	0	0	0.05	0.135842	1.04287
GSE22138_GSM550669	0.0154358	0.0276043	0.0157217	0.0657444	0	0.116495	0.00723031	0	0.138444	0	0.0450189	0.00263011	0.0473315	0.122186	0	0.340489	0.00532912	0	0.05034	0	0	0	0.094	0.101366	1.04672
GSE22138_GSM550670	0.0678917	0	0.0142955	0.326051	0	0	0.0161666	0.0377833	0.0633802	0	0	0	0	0.0152467	0.0912742	0.336461	0	0	0.0303044	0	0	0.00114486	0.062	0.126674	1.04209
GSE22138_GSM550671	0.0383413	0	0.0383731	0.0730688	0.0265525	0	0.0129688	0	0.0478228	0.144474	0	0.0233158	0.0115297	0.0674278	0.0327766	0.382731	0.0274709	0	0.073147	0	0	0	0.058	0.129886	1.03307
GSE22138_GSM550672	0.125679	0	0.121588	0.0468363	0	0.0749474	0.0118526	0	0.0432919	0	0.0237289	0.009569	0.0113831	0.037431	0.037807	0.374868	0.0547333	0	0	0.0203803	0	0.00590436	0.007	0.324938	0.952521
GSE22138_GSM550673	0.00375275	0	0.0831553	0.39297	0	0	0.0438832	0.108431	0.0232562	0.107127	0	0.0157829	0	0.0322084	0.0676537	0.0865797	0.0198416	0	0.0153581	0	0	0	0.039	0.164659	1.05043
GSE22138_GSM550674	0.107216	0	0.0336172	0.222441	0	0.094052	0.0175615	0	0.0867669	0	0	0.0443416	0.0286459	0.160443	0	0.204914	0	0	0	0	0	0	0.029	0.188097	1.01604
GSE22138_GSM550675	0.16464	0	0.0528768	0.257448	0	0.0477157	0.0233416	0	0.131408	0	0.0895601	0	0.0595484	0.0362999	0	0.10783	0.0293314	0	0	0	0	0	0.014	0.242813	0.996866
GSE22138_GSM550676	0.119099	0	0.055736	0.101874	0	0.176242	0	0	0.0974	0	0.083666	0.0364546	0.0341154	0.0296938	0	0.265719	0	0	0	0	0	0	0.022	0.204128	1.0082
GSE22138_GSM550677	0.125114	0	0.0418334	0.102203	0	0.180722	0	0	0.072378	0	0.0302809	0.0267588	0.03494	0	0.049119	0.315021	0	0	0.00484745	0	0	0.0167825	0.023	0.198417	1.00575
GSE22138_GSM550678	0.100319	0	0.0618551	0.234249	0	0.225452	0	0	0.187705	0	0.00932999	0.0476892	0.0406106	0	0.0131392	0.0703751	0	0	0	0.00515749	0	0.00411863	0.041	0.160007	1.059
GSE22138_GSM550679	0.0123111	0	0.0102903	0.258326	0	0	0	0.0578669	0.0689952	0.0319667	0	0.0708179	0	0.160637	0.0607119	0.220053	0.00291733	0	0.0451075	0	0	0	0.1	0.0965348	1.05931
GSE22138_GSM550680	0.11732	0	0.123055	0.0950942	0	0.251282	0	0	0.166238	0	0.0252994	0.083975	0.0350675	0.0396203	0	0.0560251	0	0	0	0	0	0.00702322	0.012	0.250023	1.00566
GSE22138_GSM550681	0.0937401	0.0109144	0.0285461	0.139861	0	0.197419	0	0	0.157918	0	0.00586946	0.100941	0.0439184	0	0.0092802	0.192925	0	0	0	0	0	0.0186681	0.051	0.135624	1.0498
GSE22138_GSM550682	0.120475	0	0.031006	0.170619	0	0.13584	0	0	0.156196	0	0.0493425	0.0449907	0.0577545	0.0555253	0	0.120406	0.0578441	0	0	0	0	0	0.038	0.17321	1.02515
GSE22138_GSM550683	0.142979	0	0.0590065	0.0584453	0	0.176896	0.00470716	0.0244563	0.0794217	0	0.0716246	0	0	0.152594	0.0710901	0.12169	0	0	0	0.0155234	0	0.0215655	0.012	0.250083	0.984733
GSE22138_GSM550684	0	0.0237779	0.0120975	0.450131	0	0	0	0.0716706	0.106239	0	0	0.0787531	0	0.00499201	0.00649485	0.245316	0	0	0	0.000527764	0	0	0.101	0.0946878	1.09435
GSE22138_GSM550685	0.0541262	0	0.0301334	0.232674	0	0	0.0264394	0	0.0853694	0	0.0402924	0	0.0370761	0.211277	0	0.23088	0.0282201	0	0	0.023513	0	0	0.042	0.159229	1.0263
