# Supplementary material for: Tryptophan metabolism-related gene expression patterns: unveiling prognostic insights and immune landscapes in uveal melanoma
Source: Aging (Albany NY). 2023 Oct 13;15(20):11201–16. doi: 10.18632/aging.205122 (PMC10637787; doi:10.18632/aging.205122)
Supplement: Supplementary File 4 [file aging-15-205122-s004.xlsx]

## Sheet: Supplementary File 4
Supplementary File 4. The gene marker from ImmuCellAI.
Gene	Immune	cor	text	pvalue
ATP13A3	B cells naive	0.102522		0.439713
CHST11	B cells naive	-0.0249869		0.850994
TPST2	B cells naive	-0.230412		0.0791457
TAPBPL	B cells naive	-0.31254	*	0.0159518
MRPL24	B cells naive	-0.0357833		0.787882
riskScore	B cells naive	-0.263562	*	0.0437002
ATP13A3	B cells memory	0.0936023		0.480723
CHST11	B cells memory	-0.10271		0.43887
TPST2	B cells memory	0.264366	*	0.0430384
TAPBPL	B cells memory	0.0084541		0.949329
MRPL24	B cells memory	-0.00415699		0.975072
riskScore	B cells memory	0.0522659		0.694215
ATP13A3	Plasma cells	0.42149	***	0.000885409
CHST11	Plasma cells	-0.101835		0.442803
TPST2	Plasma cells	-0.167473		0.204856
TAPBPL	Plasma cells	-0.300037	*	0.0209554
MRPL24	Plasma cells	-0.187706		0.154552
riskScore	Plasma cells	-0.324128	*	0.0122652
ATP13A3	T cells CD8	0.0277697		0.834621
CHST11	T cells CD8	0.251447		0.0547234
TPST2	T cells CD8	0.00245542		0.985274
TAPBPL	T cells CD8	0.440456	***	0.000480989
MRPL24	T cells CD8	-0.179187		0.174484
riskScore	T cells CD8	0.196843		0.135099
ATP13A3	T cells CD4 memory resting	0.012503		0.92512
CHST11	T cells CD4 memory resting	-0.229438		0.0804567
TPST2	T cells CD4 memory resting	-0.175425		0.183859
TAPBPL	T cells CD4 memory resting	-0.484941	***	9.92357e-05
MRPL24	T cells CD4 memory resting	-0.0480411		0.717857
riskScore	T cells CD4 memory resting	-0.278597	*	0.0326257
ATP13A3	T cells CD4 memory activated	0.205219		0.11894
CHST11	T cells CD4 memory activated	0.0414249		0.755408
TPST2	T cells CD4 memory activated	-0.0599862		0.651765
TAPBPL	T cells CD4 memory activated	-0.0947733		0.475226
MRPL24	T cells CD4 memory activated	0.0173935		0.89597
riskScore	T cells CD4 memory activated	-0.108848		0.411857
ATP13A3	T cells follicular helper	-0.0439646		0.740922
CHST11	T cells follicular helper	0.183812		0.163444
TPST2	T cells follicular helper	0.0749583		0.57259
TAPBPL	T cells follicular helper	0.429065	***	0.000696853
MRPL24	T cells follicular helper	-0.0931176		0.483008
riskScore	T cells follicular helper	0.245185		0.0612502
ATP13A3	T cells regulatory (Tregs)	0.109468		0.408171
CHST11	T cells regulatory (Tregs)	-0.385272	**	0.00275786
TPST2	T cells regulatory (Tregs)	-0.10263		0.438208
TAPBPL	T cells regulatory (Tregs)	-0.351666	**	0.00657218
MRPL24	T cells regulatory (Tregs)	-0.250146		0.0562657
riskScore	T cells regulatory (Tregs)	-0.259205	*	0.0477107
ATP13A3	T cells gamma delta	-0.158851		0.22948
CHST11	T cells gamma delta	0.110023		0.406795
TPST2	T cells gamma delta	-0.0616389		0.642814
TAPBPL	T cells gamma delta	0.200709		0.127447
MRPL24	T cells gamma delta	0.0126098		0.924482
riskScore	T cells gamma delta	0.130811		0.32338
ATP13A3	NK cells resting	0.0659607		0.619645
CHST11	NK cells resting	-0.0985477		0.45774
TPST2	NK cells resting	0.174342		0.186624
TAPBPL	NK cells resting	-0.168986		0.200735
MRPL24	NK cells resting	0.026112		0.844366
riskScore	NK cells resting	-0.035885		0.787293
ATP13A3	NK cells activated	-0.00879157		0.94731
CHST11	NK cells activated	-0.00436588		0.97382
TPST2	NK cells activated	-0.185042		0.160596
TAPBPL	NK cells activated	0.0572947		0.666449
MRPL24	NK cells activated	-0.201369		0.126175
riskScore	NK cells activated	-0.0401302		0.762826
ATP13A3	Monocytes	-0.0222341		0.867252
CHST11	Monocytes	-0.0120657		0.927732
TPST2	Monocytes	0.0271256		0.838404
TAPBPL	Monocytes	-0.253528		0.0526842
MRPL24	Monocytes	0.0939463		0.479105
riskScore	Monocytes	-0.0710897		0.592619
ATP13A3	Macrophages M0	-0.0362945		0.784923
CHST11	Macrophages M0	-0.116858		0.378089
TPST2	Macrophages M0	0.0324247		0.80739
TAPBPL	Macrophages M0	-0.0664911		0.616825
MRPL24	Macrophages M0	-0.0128409		0.923103
riskScore	Macrophages M0	-0.027089		0.838619
ATP13A3	Macrophages M1	-0.0859897		0.517264
CHST11	Macrophages M1	0.193278		0.142457
TPST2	Macrophages M1	0.220322		0.0935836
TAPBPL	Macrophages M1	0.368222	**	0.00411233
MRPL24	Macrophages M1	0.0446144		0.737229
riskScore	Macrophages M1	0.3347	**	0.00956777
ATP13A3	Macrophages M2	-0.122036		0.357173
CHST11	Macrophages M2	0.00134426		0.991938
TPST2	Macrophages M2	0.157191		0.234447
TAPBPL	Macrophages M2	0.11473		0.386894
MRPL24	Macrophages M2	0.342729	**	0.00787866
riskScore	Macrophages M2	0.108184		0.414732
ATP13A3	Dendritic cells resting	-0.307279	*	0.0179164
CHST11	Dendritic cells resting	0.331851	*	0.0102385
TPST2	Dendritic cells resting	0.13048		0.324618
TAPBPL	Dendritic cells resting	0.421269	***	0.000891544
MRPL24	Dendritic cells resting	0.219964		0.0941316
riskScore	Dendritic cells resting	0.397091	**	0.00184586
ATP13A3	Dendritic cells activated	0.0336355		0.800344
CHST11	Dendritic cells activated	0.159466		0.227659
TPST2	Dendritic cells activated	-0.0917716		0.489384
TAPBPL	Dendritic cells activated	-0.0281304		0.832503
MRPL24	Dendritic cells activated	-0.0122201		0.92681
riskScore	Dendritic cells activated	-0.0318811		0.810559
ATP13A3	Mast cells resting	-0.122279		0.356209
CHST11	Mast cells resting	0.129168		0.329551
TPST2	Mast cells resting	0.0547215		0.680604
TAPBPL	Mast cells resting	0.214532		0.102753
MRPL24	Mast cells resting	0.0555664		0.675944
riskScore	Mast cells resting	0.186131		0.158103
ATP13A3	Eosinophils	0.0423144		0.750325
CHST11	Eosinophils	-0.205234		0.118913
TPST2	Eosinophils	-0.253513		0.0526979
TAPBPL	Eosinophils	-0.291727	*	0.0249703
MRPL24	Eosinophils	-0.0786637		0.553704
riskScore	Eosinophils	-0.242515		0.0642167
